# Supplementary material for: Novel recurrently mutated genes and a prognostic mutation signature in colorectal cancer
Source: HighWire-hosted journal article supplement (doi:10.1136/gutjnl-2013-306620), 2014-06-20
Supplement: gutjnl-2013-306620supp_tableS1.pdf [file gutjnl-2013-306620supp_tableS1.pdf]

**Table S1.** Distribution of somatic mutations identified in 22 human colorectal cancer exomes.

| sample | syn | missense | nonsense | splicing | frameshift_indel | nonframeshift_indel | Total |
|--------|-----|----------|----------|----------|------------------|---------------------|-------|
| D1     | 5   | 15       | 1        | 0        | 0                | 0                   | 21    |
| D2     | 17  | 31       | 3        | 3        | 1                | 0                   | 55    |
| D3     | 19  | 62       | 7        | 2        | 10               | 3                   | 103   |
| D4     | 15  | 20       | 1        | 0        | 5                | 3                   | 44    |
| D5     | 11  | 30       | 3        | 2        | 2                | 0                   | 48    |
| D6     | 11  | 36       | 6        | 1        | 3                | 0                   | 57    |
| D7     | 15  | 42       | 3        | 1        | 4                | 0                   | 65    |
| D8     | 16  | 36       | 7        | 3        | 5                | 0                   | 67    |
| D9     | 8   | 29       | 5        | 1        | 2                | 0                   | 45    |
| D10    | 26  | 49       | 9        | 2        | 3                | 0                   | 89    |
| D11    | 16  | 39       | 1        | 0        | 0                | 0                   | 56    |
| D12    | 22  | 67       | 3        | 5        | 4                | 0                   | 101   |
| D13    | 14  | 28       | 3        | 0        | 0                | 0                   | 45    |
| D14    | 6   | 16       | 1        | 1        | 0                | 1                   | 25    |
| D15    | 12  | 37       | 5        | 1        | 4                | 2                   | 61    |
| D16    | 28  | 65       | 5        | 1        | 7                | 3                   | 109   |
| D17    | 3   | 8        | 1        | 0        | 1                | 0                   | 13    |
| D18    | 6   | 32       | 6        | 3        | 1                | 2                   | 50    |
| D19    | 8   | 28       | 5        | 0        | 2                | 0                   | 43    |
| D20    | 12  | 18       | 2        | 1        | 5                | 1                   | 39    |
| D21    | 5   | 28       | 2        | 0        | 2                | 0                   | 37    |
| D22    | 15  | 48       | 6        | 2        | 4                | 0                   | 75    |
