# Supplementary material for: Novel recurrently mutated genes and a prognostic mutation signature in colorectal cancer
Source: HighWire-hosted journal article supplement (doi:10.1136/gutjnl-2013-306620), 2014-06-20
Supplement: gutjnl-2013-306620supp_tableS2.pdf [file gutjnl-2013-306620supp_tableS2.pdf]

**Table S2.** A complete list of somatic point mutations identified in 22 colorectal cancer patients by exome sequencing.

| Chrom | Start    | End      | Ref | Obs | Func            | ExonicFunc        | Gene     | Amino acid change              | dbsnp_id | SIFT | mutated | sample |
|-------|----------|----------|-----|-----|-----------------|-------------------|----------|--------------------------------|----------|------|---------|--------|
| chr1  | 94285138 | 94285138 | C   | T   | exonic          | nonsynonymous SNV | ABCA4    | NM_000350:c.G2843A:p.R948H     |          | 0.13 | D15     |        |
| chr1  | 1.17E+08 | 1.17E+08 | C   | T   | exonic          | synonymous SNV    | TTF2     | NM_003594:c.C1107T:p.P369P     |          |      | D15     |        |
| chr1  | 1.75E+08 | 1.75E+08 | C   | T   | exonic          | nonsynonymous SNV | ASTN1    | NM_004319:c.G2530A:p.D844N     |          | 0.01 | D15     |        |
| chr1  | 1.98E+08 | 1.98E+08 | C   | T   | exonic          | synonymous SNV    | FAM58B   | NM_001105517:c.C252T:p.A84A    |          |      | D15     |        |
| chr2  | 26852797 | 26852797 | G   | A   | exonic          | nonsynonymous SNV | C2orf18  | NM_017877:c.G589A:p.E197K      |          | 0    | D15     |        |
| chr2  | 53810098 | 53810098 | C   | G   | splicing        |                   | ASB3     |                                |          |      | D15     |        |
| chr2  | 1.45E+08 | 1.45E+08 | C   | T   | exonic          | synonymous SNV    | ZEB2     | NM_001171653:c.G144A:p.E48E    |          |      | D15     |        |
| chr2  | 1.45E+08 | 1.45E+08 | C   | G   | exonic          | nonsynonymous SNV | ZEB2     | NM_001171653:c.G142C:p.E48Q    |          | 0.01 | D15     |        |
| chr2  | 1.79E+08 | 1.79E+08 | T   | C   | exonic          | synonymous SNV    | TTN      | NM_003319:c.A3123G:p.K1041K    |          |      | D15     |        |
| chr2  | 1.89E+08 | 1.89E+08 | C   | T   | exonic          | nonsynonymous SNV | DIRC1    | NM_052952:c.G61A:p.G21R        |          |      | D15     |        |
| chr4  | 89196305 | 89196305 | C   | T   | exonic          | nonsynonymous SNV | PKD2     | NM_000297:c.C1760T:p.S587L     |          | 0    | D15     |        |
| chr4  | 1.51E+08 | 1.51E+08 | G   | A   | exonic;splicing | nonsynonymous SNV | DCLK2    | NM_001040260:c.G1778A:p.S593N  |          | 0.01 | D15     |        |
| chr5  | 55458586 | 55458586 | C   | T   | exonic          | synonymous SNV    | ANKRD55  | NM_024669:c.G717A:p.A239A      |          |      | D15     |        |
| chr5  | 77599150 | 77599150 | C   | T   | exonic          | nonsynonymous SNV | AP3B1    | NM_003664:c.G154A:p.E52K       |          | 0.01 | D15     |        |
| chr5  | 1.12E+08 | 1.12E+08 | C   | T   | exonic          | stopgain SNV      | APC      | NM_001127511:c.C793T:p.R265X   |          | 0    | D15     |        |
| chr5  | 1.12E+08 | 1.12E+08 | G   | T   | exonic          | stopgain SNV      | APC      | NM_001127511:c.G3862T:p.E1288X |          | 0.1  | D15     |        |
| chr6  | 26515898 | 26515898 | G   | C   | exonic          | nonsynonymous SNV | BTN3A1   | NM_001145009:c.G454C:p.V152L   |          | 0.04 | D15     |        |
| chr6  | 28335391 | 28335391 | C   | T   | exonic          | nonsynonymous SNV | NKAPL    | NM_001007531:c.C263T:p.S88L    |          | 0    | D15     |        |
| chr6  | 38837533 | 38837533 | G   | A   | exonic          | synonymous SNV    | DNAH8    | NM_001371:c.G942A:p.T314T      |          |      | D15     |        |
| chr7  | 11642998 | 11642998 | G   | A   | exonic          | synonymous SNV    | THSD7A   | NM_015204:c.C306T:p.A102A      |          |      | D15     |        |
| chr7  | 43560758 | 43560758 | C   | T   | exonic          | nonsynonymous SNV | HECW1    | NM_015052:c.C4553T:p.A1518V    |          | 0.36 | D15     |        |
| chr7  | 75532151 | 75532151 | T   | G   | exonic          | nonsynonymous SNV | MDH2     | NM_005918:c.T829G:p.F277V      |          | 0    | D15     |        |
| chr7  | 1.5E+08  | 1.5E+08  | C   | T   | exonic          | nonsynonymous SNV | GIMAP4   | NM_018326:c.C941T:p.A314V      |          | 0.66 | D15     |        |
| chr8  | 95947016 | 95947016 | C   | T   | exonic          | nonsynonymous SNV | INTS8    | NM_017864:c.C2183T;p.S728F     |          | 0    | D15     |        |
| chr9  | 1.22E+08 | 1.22E+08 | G   | A   | exonic          | nonsynonymous SNV | CDK5RAP2 | NM_001011649:c.C4222T;p.R1408C |          | 0    | D15     |        |
| chr10 | 27366949 | 27366949 | C   | T   | exonic          | nonsynonymous SNV | ANKRD26  | NM_014915:c.G2416A:p.D806N     |          | 0.13 | D15     |        |
| chr10 | 35969436 | 35969436 | C   | G   | exonic          | nonsynonymous SNV | FZD8     | NM_031866:c.G928C:p.E310Q      |          | 0    | D15     |        |
| chr11 | 54892778 | 54892778 | C   | A   | exonic          | synonymous SNV    | OR4A15   | NM_001005275:c.C843A:p.P281P   |          |      | D15     |        |
| chr11 | 66213978 | 66213978 | G   | A   | exonic          | synonymous SNV    | SPTBN2   | NM_006946:c.C5823T;p.S1941S    |          |      | D15     |        |
| chr11 | 1.28E+08 | 1.28E+08 | T   | A   | exonic          | stopgain SNV      | KCNJ1    | NM_000220:c.A568T:p.K190X      |          | 0.02 | D15     |        |
| chr12 | 43457352 | 43457352 | C   | T   | exonic          | nonsynonymous SNV | NELL2    | NM_001145108:c.G619A:p.D207N   |          | 0    | D15     |        |
| chr12 | 51355258 | 51355258 | C   | T   | exonic          | nonsynonymous SNV | KRT1     | NM_006121:c.G1921A;p.G641R     |          | 0.1  | D15     |        |
| chr12 | 54768144 | 54768144 | A   | G   | exonic          | nonsynonymous SNV | ERBB3    | NM_001982:c.A805G:p.T269A      |          | 0.04 | D15     |        |
| chr12 | 1.01E+08 | 1.01E+08 | G   | A   | exonic          | synonymous SNV    | GNPTAB   | NM_024312:c.C2613T;p.G871G     |          |      | D15     |        |
| chr13 | 47517803 | 47517803 | A   | G   | exonic          | nonsynonymous SNV | NUDT15   | NM_018283:c.A362G:p.E121G      |          | 0.14 | D15     |        |
| chr13 | 98951999 | 98951999 | C   | A   | exonic          | nonsynonymous SNV | TM9SF2   | NM_004800:c.C138A:p.F46L       |          | 0.04 | D15     |        |
| chr15 | 26031844 | 26031844 | C   | T   | exonic          | nonsynonymous SNV | HERC2    | NM_004667:c.G14200A:p.A4734T   |          | 0    | D15     |        |
| chr16 | 56057607 | 56057607 | T   | A   | exonic          | nonsynonymous SNV | POLR2C   | NM_032940:c.T225A:p.S75R       |          | 0    | D15     |        |
| chr17 | 7519221  | 7519221  | A   | G   | exonic          | nonsynonymous SNV | TP53     | NM_001126115:c.T38C:p.L13P     |          | 0    | D15     |        |
| chr17 | 39244022 | 39244022 | C   | T   | exonic          | nonsynonymous SNV | MPP3     | NM_001932:c.G1333A;p.D445N     |          | 0.12 | D15     |        |
| chr18 | 28514445 | 28514445 | G   | A   | exonic          | nonsynonymous SNV | KLHL14   | NM_020805:c.C1354T;p.R452C     |          | 0.04 | D15     |        |
| chr18 | 59622707 | 59622707 | C   | T   | exonic          | nonsynonymous SNV | SERPINB7 | NM_001040147:c.C1001T;p.T334I  |          | 0.01 | D15     |        |
| chr19 | 23334287 | 23334287 | C   | A   | exonic          | nonsynonymous SNV | ZNF91    | NM_003430:c.G3334T;p.G1112C    |          |      | D15     |        |
| chr19 | 57019765 | 57019765 | C   | A   | exonic          | nonsynonymous SNV | FPR3     | NM_002030:c.C952A:p.P318T      |          | 0.54 | D15     |        |
| chr19 | 61728238 | 61728238 | C   | G   | exonic          | synonymous SNV    | ZNF471   | NM_020813:c.C990G;p.G330G      |          |      | D15     |        |
| chr19 | 62696955 | 62696955 | A   | T   | exonic          | nonsynonymous SNV | ZNF419   | NM_001098495:c.A1083T;p.R361S  |          | 0.01 | D15     |        |
| chr20 | 18234401 | 18234401 | C   | T   | exonic          | nonsynonymous SNV | ZNF133   | NM_001083330:c.C71T;p.T24I     |          | 0.11 | D15     |        |
| chr20 | 31071843 | 31071843 | G   | T   | exonic          | nonsynonymous SNV | BPIL1    | NM_025227:c.G1129T;p.G377W     |          | 0    | D15     |        |

|       |          |          |   |   |          |                            |                               |            |      |    |
|-------|----------|----------|---|---|----------|----------------------------|-------------------------------|------------|------|----|
| chr20 | 31225590 | 31225590 | C | T | exonic   | nonsynonymous SN\ C20orf70 | NM_080574:c.C347T:p.P116L     | 1          | D15  |    |
| chr20 | 33741891 | 33741891 | C | T | exonic   | nonsynonymous SN\ NFS1     | NM_021100:c.G419A:p.R140Q     | 0.22       | D15  |    |
| chrX  | 18935361 | 18935361 | G | A | exonic   | synonymous SNV GPR64       | NM_001184835:c.C1488T:p.Y496Y |            | D15  |    |
| chrX  | 53475783 | 53475783 | G | A | exonic   | nonsynonymous SN\ HSD17B10 | NM_001037811:c.C364T:p.L122F  | 0.01       | D15  |    |
| chrX  | 63481764 | 63481764 | G | A | exonic   | stopgain SNV MTMR8         | NM_017677:c.C751T:p.R251X     | 0.16       | D15  |    |
| chrX  | 1E+08    | 1E+08    | C | T | exonic   | nonsynonymous SN\ BTK      | NM_000061:c.G1279A:p.V427M    | 0          | D15  |    |
| chrX  | 1.38E+08 | 1.38E+08 | A | T | exonic   | stopgain SNV FGF13         | NM_004114:c.T465A:p.Y155X     | 0.09       | D15  |    |
| chr1  | 65834793 | 65834793 | C | G | exonic   | nonsynonymous SN\ LEPR     | NM_001198687:c.C778G:p.P260A  | 0.04       | D3   |    |
| chr1  | 1.68E+08 | 1.68E+08 | G | A | exonic   | nonsynonymous SN\ SLC19A2  | NM_006996:c.C823T:p.R275C     | 0.02       | D3   |    |
| chr1  | 2.03E+08 | 2.03E+08 | T | A | exonic   | nonsynonymous SN\ DSTYK    | NM_199462:c.A2634T:p.R878S    | 0.56       | D3   |    |
| chr1  | 2.05E+08 | 2.05E+08 | A | G | exonic   | nonsynonymous SN\ IL19     | NM_153758:c.A52G:p.T18A       |            | D3   |    |
| chr1  | 2.17E+08 | 2.17E+08 | C | T | exonic   | nonsynonymous SN\ TGFB2    | NM_003238:c.C917T:p.A306V     | 0.18       | D3   |    |
| chr1  | 2.28E+08 | 2.28E+08 | G | A | exonic   | nonsynonymous SN\ GALNT2   | NM_004481:c.G1153A:p.A385T    | 0.01       | D3   |    |
| chr2  | 20701770 | 20701770 | G | A | exonic   | nonsynonymous SN\ HS1BP3   | NM_022460:c.C530T:p.A177V     | 0.15       | D3   |    |
| chr2  | 21089595 | 21089595 | C | A | exonic   | synonymous SNV APOB        | NM_000384:c.G4158T:p.R1386R   |            | D3   |    |
| chr2  | 61157681 | 61157681 | A | C | exonic   | nonsynonymous SN\ KIAA1841 | NM_001129993:c.A554C:p.Q185P  |            | D3   |    |
| chr2  | 1.02E+08 | 1.02E+08 | T | C | exonic   | nonsynonymous SN\ IL18RAP  | NM_003853:c.T632C:p.V211A     | 0.02       | D3   |    |
| chr2  | 1.79E+08 | 1.79E+08 | A | G | exonic   | synonymous SNV FKBP7       | NM_001135212:c.T517C:p.L173L  |            | D3   |    |
| chr2  | 1.92E+08 | 1.92E+08 | C | T | exonic   | nonsynonymous SN\ STAT4    | NM_003151:c.G733A:p.A245T     | 0          | D3   |    |
| chr2  | 2.17E+08 | 2.17E+08 | G | A | exonic   | nonsynonymous SN\ XRCC5    | NM_021141:c.G721A:p.E241K     | 0.06       | D3   |    |
| chr3  | 1.27E+08 | 1.27E+08 | C | T | exonic   | nonsynonymous SN\ ALDH1L1  | NM_012190:c.G897A:p.M299I     |            | D3   |    |
| chr3  | 1.31E+08 | 1.31E+08 | T | C | exonic   | nonsynonymous SN\ IFT122   | NM_052990:c.T1783C:p.F595L    | rs73204230 | 0.01 | D3 |
| chr3  | 1.31E+08 | 1.31E+08 | C | T | exonic   | synonymous SNV IFT122      | NM_052990:c.C1794T:p.A598A    | rs73204231 |      | D3 |
| chr3  | 1.43E+08 | 1.43E+08 | C | T | exonic   | nonsynonymous SN\ ATP1B3   | NM_001679:c.C260T:p.P87L      |            | 0.11 | D3 |
| chr3  | 1.44E+08 | 1.44E+08 | T | G | exonic   | nonsynonymous SN\ ATR      | NM_001184:c.A7842C:p.L2614F   |            | 0.11 | D3 |
| chr3  | 1.5E+08  | 1.5E+08  | G | T | exonic   | nonsynonymous SN\ GYG1     | NM_001184720:c.G746T:p.W249L  |            | 0    | D3 |
| chr3  | 1.59E+08 | 1.59E+08 | C | A | exonic   | nonsynonymous SN\ VEPH1    | NM_001167917:c.G165T:p.Q55H   |            | 0.01 | D3 |
| chr3  | 1.62E+08 | 1.62E+08 | G | A | exonic   | nonsynonymous SN\ TRIM59   | NM_173084:c.C772T:p.R258C     |            | 0.04 | D3 |
| chr4  | 77004624 | 77004624 | A | T | exonic   | nonsynonymous SN\ PPEF2    | NM_006239:c.T2001A:p.D667E    |            |      | D3 |
| chr4  | 82284413 | 82284413 | G | A | exonic   | nonsynonymous SN\ PRKG2    | NM_006259:c.C1250T:p.A417V    |            | 0.13 | D3 |
| chr4  | 1.01E+08 | 1.01E+08 | G | A | exonic   | nonsynonymous SN\ MTTT     | NM_000253:c.G424A:p.A142T     |            | 0.51 | D3 |
| chr5  | 40879235 | 40879235 | G | T | exonic   | nonsynonymous SN\ CARD6    | NM_032587:c.G508T:p.D170Y     |            | 0.08 | D3 |
| chr5  | 1.02E+08 | 1.02E+08 | A | T | exonic   | nonsynonymous SN\ PAM      | NM_000919:c.A1229T:p.Y410F    |            | 0.33 | D3 |
| chr5  | 1.12E+08 | 1.12E+08 | G | T | exonic   | stopgain SNV APC           | NM_001127511:c.G1843T:p.E615X |            | 0.01 | D3 |
| chr5  | 1.19E+08 | 1.19E+08 | G | T | exonic   | stopgain SNV HSD17B4       | NM_001199292:c.G1252T:p.G418X |            | 0.05 | D3 |
| chr5  | 1.31E+08 | 1.31E+08 | G | T | exonic   | nonsynonymous SN\ ACSL6    | NM_001205251:c.C875A:p.P292Q  |            | 0    | D3 |
| chr5  | 1.53E+08 | 1.53E+08 | G | T | exonic   | nonsynonymous SN\ GRIA1    | NM_000827:c.G907T:p.A303S     |            | 0    | D3 |
| chr6  | 8364910  | 8364910  | C | T | splicing | SLC35B3                    |                               |            |      | D3 |
| chr6  | 26135194 | 26135194 | T | C | exonic   | nonsynonymous SN\ HIST1H4B | NM_003544:c.A266G:p.Y89C      |            |      | D3 |
| chr6  | 1.12E+08 | 1.12E+08 | G | A | exonic   | stopgain SNV FYN           | NM_153047:c.C1165T:p.R389X    |            | 1    | D3 |
| chr6  | 1.3E+08  | 1.3E+08  | C | T | exonic   | synonymous SNV LAMA2       | NM_000426:c.C7056T:p.S2352S   |            |      | D3 |
| chr6  | 1.39E+08 | 1.39E+08 | C | A | exonic   | nonsynonymous SN\ KIAA1244 | NM_020340:c.C4850A:p.A1617D   |            | 0    | D3 |
| chr6  | 1.53E+08 | 1.53E+08 | A | T | exonic   | nonsynonymous SN\ SYNE1    | NM_033071:c.T9793A:p.S3265T   |            | 0.36 | D3 |
| chr7  | 29946986 | 29946986 | C | A | exonic   | synonymous SNV SCR1        | NM_001145515:c.G372T:p.S124S  |            |      | D3 |
| chr7  | 43630712 | 43630712 | T | A | exonic   | nonsynonymous SN\ STK17A   | NM_004760:c.T991A:p.F331I     |            | 0.47 | D3 |
| chr7  | 91512347 | 91512347 | G | A | exonic   | nonsynonymous SN\ AKAP9    | NM_005751:c.G5252A:p.R1751H   |            | 0.06 | D3 |
| chr7  | 1.21E+08 | 1.21E+08 | T | C | exonic   | nonsynonymous SN\ PTPRZ1   | NM_002851:c.T5978C:p.I1993T   |            |      | D3 |
| chr7  | 1.39E+08 | 1.39E+08 | A | G | exonic   | nonsynonymous SN\ PARP12   | NM_022750:c.T895C:p.Y299H     |            | 0    | D3 |
| chr7  | 1.41E+08 | 1.41E+08 | C | A | exonic   | nonsynonymous SN\ TAS2R5   | NM_018980:c.C496A:p.Q166K     |            | 1    | D3 |
| chr8  | 41664844 | 41664844 | A | T | exonic   | synonymous SNV ANK1        | NM_000037:c.T4245A:p.G1415G   |            |      | D3 |
| chr8  | 66768438 | 66768438 | C | T | exonic   | synonymous SNV MTFR1       | NM_001145838:c.C72T:p.N24N    |            |      | D3 |
| chr8  | 94846825 | 94846825 | G | A | exonic   | synonymous SNV TMEM67      | NM_153704:c.G522A:p.E174E     |            |      | D3 |
| chr9  | 21207084 | 21207084 | G | A | exonic   | nonsynonymous SN\ IFNA16   | NM_002173:c.C221T:p.A74V      |            | 0.03 | D3 |

|       |          |          |   |   |          |                            |                                |             |      |     |
|-------|----------|----------|---|---|----------|----------------------------|--------------------------------|-------------|------|-----|
| chr9  | 32479405 | 32479405 | A | G | exonic   | nonsynonymous SN\ DDX58    | NM_014314:c.T736C:p.Y246H      | 0           | D3   |     |
| chr9  | 99177587 | 99177587 | C | T | exonic   | synonymous SNV C9orf174    | NM_020893:c.C4869T:p.V1623V    |             | D3   |     |
| chr9  | 1.37E+08 | 1.37E+08 | G | T | exonic   | nonsynonymous SN\ FCN1     | NM_002003:c.C266A:p.P89H       | 0           | D3   |     |
| chr9  | 1.38E+08 | 1.38E+08 | C | T | exonic   | nonsynonymous SN\ SOHLH1   | NM_001012415:c.G343A:p.A115T   | 0.19        | D3   |     |
| chr10 | 35367956 | 35367956 | A | T | exonic   | nonsynonymous SN\ CUL2     | NM_001198777:c.T775A:p.Y259N   | 0.13        | D3   |     |
| chr10 | 97184457 | 97184457 | G | A | exonic   | synonymous SNV SORBS1      | NM_001034954:c.C84T:p.A28A     |             | D3   |     |
| chr10 | 1E+08    | 1E+08    | C | T | exonic   | nonsynonymous SN\ LOXL4    | NM_032211:c.G1165A:p.D389N     | 0.11        | D3   |     |
| chr10 | 1.02E+08 | 1.02E+08 | T | G | exonic   | nonsynonymous SN\ ERLIN1   | NM_006459:c.A522C:p.K174N      | 0.02        | D3   |     |
| chr10 | 1.33E+08 | 1.33E+08 | C | A | exonic   | synonymous SNV TCERG1L     | NM_174937:c.G1551T:p.L517L     |             | D3   |     |
| chr11 | 10483921 | 10483921 | G | A | exonic   | nonsynonymous SN\ AMPD3    | NM_001172431:c.G1741A:p.A581T  | 0.01        | D3   |     |
| chr11 | 14471814 | 14471814 | T | C | exonic   | synonymous SNV COPB1       | NM_001144061:c.A441G:p.R147R   |             | D3   |     |
| chr11 | 26421909 | 26421909 | A | G | exonic   | nonsynonymous SN\ ANO3     | NM_031418:c.A263G:p.N88S       | 0.55        | D3   |     |
| chr11 | 35295601 | 35295601 | T | C | exonic   | nonsynonymous SN\ SLC1A2   | NM_004171:c.A56G:p.H19R        | 0.04        | D3   |     |
| chr11 | 77267648 | 77267648 | G | A | exonic   | nonsynonymous SN\ INTS4    | NM_033547:c.C2887T:p.R963C     | 0           | D3   |     |
| chr11 | 1.08E+08 | 1.08E+08 | G | T | exonic   | stopgain SNV ATM           | NM_000051:c.G64T:p.E22X        | 0           | D3   |     |
| chr11 | 1.33E+08 | 1.33E+08 | G | A | exonic   | nonsynonymous SN\ SPATA19  | NM_174927:c.C149T:p.A50V       | rs2282602   | D3   |     |
| chr12 | 21339923 | 21339923 | A | G | exonic   | synonymous SNV SLCO1A2     | NM_021094:c.T1146C:p.I382I     |             | D3   |     |
| chr12 | 54962499 | 54962499 | T | C | exonic   | nonsynonymous SN\ CS       | NM_004077:c.A560G:p.Q187R      | rs77708038  | 0.1  | D3  |
| chr12 | 54962511 | 54962511 | C | T | exonic   | nonsynonymous SN\ CS       | NM_004077:c.G548A:p.R183Q      | rs116165297 | 0.04 | D3  |
| chr12 | 84042322 | 84042322 | G | A | exonic   | nonsynonymous SN\ LRR1Q1   | NM_001079910:c.G3901A:p.D1301N |             | 0    | D3  |
| chr12 | 94628500 | 94628500 | C | T | exonic   | nonsynonymous SN\ NTN4     | NM_021229:c.G1030A:p.D344N     |             | 0.04 | D3  |
| chr12 | 1.05E+08 | 1.05E+08 | G | A | exonic   | nonsynonymous SN\ POLR3B   | NM_001160708:c.G248A:p.R83H    |             | 0    | D3  |
| chr12 | 1.17E+08 | 1.17E+08 | T | A | exonic   | nonsynonymous SN\ TAOK3    | NM_016281:c.A1442T:p.K481M     |             | 0    | D3  |
| chr13 | 20982195 | 20982195 | G | A | exonic   | nonsynonymous SN\ EFHA1    | NM_152726:c.C709T:p.R237C      |             | 0.03 | D3  |
| chr13 | 38163475 | 38163475 | T | C | exonic   | synonymous SNV FREM2       | NM_207361:c.T3994C:p.L1332L    |             |      | D3  |
| chr13 | 47987729 | 47987729 | A | G | exonic   | synonymous SNV RCBTB2      | NM_001268:c.T192C:p.N64N       |             |      | D3  |
| chr13 | 1.11E+08 | 1.11E+08 | C | T | exonic   | nonsynonymous SN\ ARHGEF7  | NM_001113512:c.C293T:p.S98F    |             | 0    | D3  |
| chr14 | 32361855 | 32361855 | C | T | exonic   | synonymous SNV AKAP6       | NM_004274:c.C5085T:p.D1695D    |             |      | D3  |
| chr14 | 68774138 | 68774138 | C | T | exonic   | synonymous SNV EXD2        | NM_018199:c.C1011T:p.C337C     |             |      | D3  |
| chr14 | 73797280 | 73797280 | G | A | exonic   | nonsynonymous SN\ VXS2     | NM_182894:c.G991A:p.A331T      |             | 0.17 | D3  |
| chr15 | 19305316 | 19305316 | C | T | exonic   | nonsynonymous SN\ POTE8    | NM_207355:c.G1702A:p.A568T     |             |      | D3  |
| chr15 | 42795192 | 42795192 | G | A | splicing | B2M                        |                                | rs111352556 |      | D3  |
| chr15 | 56966868 | 56966868 | G | A | exonic   | stopgain SNV SLTM          | NM_001013843:c.C2485T:p.R829X  |             |      | D3  |
| chr15 | 89326114 | 89326114 | T | C | exonic   | synonymous SNV PRC1        | NM_003981:c.A369G:p.L123L      |             |      | D3  |
| chr16 | 2153987  | 2153987  | C | T | exonic   | nonsynonymous SN\ TRAF7    | NM_032271:c.C65T:p.P22L        |             | 0.2  | D3  |
| chr17 | 38423406 | 38423406 | G | A | exonic   | synonymous SNV VAT1        | NM_006373:c.C834T:p.P278P      |             |      | D3  |
| chr17 | 71239883 | 71239883 | C | G | exonic   | nonsynonymous SN\ ITGB4    | NM_001005619:c.C1422G:p.F474L  |             | 0.95 | D3  |
| chr18 | 52756805 | 52756805 | A | G | exonic   | nonsynonymous SN\ WDR7     | NM_052834:c.A3776G:p.Q1259R    |             | 0.08 | D3  |
| chr19 | 15344122 | 15344122 | C | T | exonic   | nonsynonymous SN\ AKAP8    | NM_005858:c.G898A:p.G300S      |             | 0.84 | D3  |
| chr19 | 40450587 | 40450587 | A | T | exonic   | nonsynonymous SN\ LSR      | NM_205835:c.A1731T:p.E577D     |             | 0    | D3  |
| chr19 | 61099128 | 61099128 | C | T | exonic   | nonsynonymous SN\ NLRP13   | NM_176810:c.G3127A:p.G1043R    |             | 0    | D3  |
| chr19 | 61116300 | 61116300 | A | G | exonic   | nonsynonymous SN\ NLRP13   | NM_176810:c.T695C:p.V232A      |             | 0    | D3  |
| chr19 | 61645512 | 61645512 | G | A | exonic   | nonsynonymous SN\ ZNF667   | NM_022103:c.C664T:p.H222Y      |             | 0    | D3  |
| chr19 | 62334384 | 62334384 | C | T | exonic   | synonymous SNV USP29       | NM_020903:c.C2529T:p.S843S     |             |      | D3  |
| chr20 | 56162021 | 56162021 | G | C | exonic   | nonsynonymous SN\ C20orf85 | NM_178456:c.G84C:p.K28N        |             | 0.27 | D3  |
| chrX  | 23855323 | 23855323 | G | A | exonic   | nonsynonymous SN\ CXorf58  | NM_001169574:c.G470A:p.R157H   |             | 0.21 | D3  |
| chrX  | 40458798 | 40458798 | C | T | exonic   | nonsynonymous SN\ MED14    | NM_004229:c.G457A:p.A153T      |             | 0.43 | D3  |
| chrX  | 1.19E+08 | 1.19E+08 | C | T | splicing | SEPT6                      |                                |             |      | D3  |
| chr1  | 1946244  | 1946244  | G | A | exonic   | synonymous SNV GABRD       | NM_000815:c.G72A:p.A24A        |             |      | D11 |
| chr1  | 22775608 | 22775608 | C | T | exonic   | synonymous SNV EPHA8       | NM_001006943:c.C471T:p.A157A   |             |      | D11 |
| chr1  | 1.5E+08  | 1.5E+08  | C | T | exonic   | nonsynonymous SN\ MRPL9    | NM_031420:c.G757A:p.A253T      |             | 0.2  | D11 |
| chr1  | 1.54E+08 | 1.54E+08 | C | T | exonic   | nonsynonymous SN\ RAB25    | NM_020387:c.C364T:p.L122F      |             | 0    | D11 |
| chr1  | 1.66E+08 | 1.66E+08 | A | C | exonic   | nonsynonymous SN\ GPR161   | NM_153832:c.T650G:p.V217G      |             | 0.06 | D11 |

|       |          |          |   |   |                 |                            |                                |            |          |
|-------|----------|----------|---|---|-----------------|----------------------------|--------------------------------|------------|----------|
| chr2  | 30716956 | 30716956 | A | C | exonic          | nonsynonymous SN\ LCLAT1   | NM_001002257:c.A1098C;p.K366N  | 0.14       | D11      |
| chr2  | 1.99E+08 | 1.99E+08 | G | A | exonic          | synonymous SNV PLCL1       | NM_006226:c.G516A;p.T172T      |            | D11      |
| chr2  | 2.11E+08 | 2.11E+08 | C | A | exonic          | nonsynonymous SN\ MYL1     | NM_079420:c.G458T;p.R153L      |            | 0 D11    |
| chr3  | 3070549  | 3070549  | C | T | exonic          | nonsynonymous SN\ CNTN4    | NM_175607:c.C2870T;p.S957L     | 0.09       | D11      |
| chr3  | 7595588  | 7595588  | T | A | exonic          | synonymous SNV GRM7        | NM_000844:c.T1995A;p.G665G     |            | D11      |
| chr3  | 1.35E+08 | 1.35E+08 | A | C | exonic          | nonsynonymous SN\ TF       | NM_001063:c.A489C;p.K163N      | 0.14       | D11      |
| chr3  | 1.84E+08 | 1.84E+08 | T | C | exonic          | synonymous SNV MCF2L2      | NM_015078:c.A2415G;p.L805L     | rs61674109 | D11      |
| chr4  | 70195110 | 70195110 | A | G | exonic          | synonymous SNV UGT2B28     | NM_053039:c.A1584G;p.R528R     |            | D11      |
| chr5  | 38406255 | 38406255 | G | A | exonic          | nonsynonymous SN\ EGFLAM   | NM_152403:c.G646A;p.V216M      |            | 0 D11    |
| chr5  | 40800912 | 40800912 | T | C | exonic          | nonsynonymous SN\ PRKAA1   | NM_006251:c.A1007G;p.H336R     |            | 0.2 D11  |
| chr5  | 82852445 | 82852445 | C | A | exonic          | nonsynonymous SN\ VCAN     | NM_001164098:c.C2564A;p.T855N  |            | 0 D11    |
| chr5  | 1.12E+08 | 1.12E+08 | G | T | exonic          | stopgain SNV APC           | NM_001127511:c.G3808T;p.G1270X |            | 0.01 D11 |
| chr5  | 1.41E+08 | 1.41E+08 | C | T | exonic          | nonsynonymous SN\ HDAC3    | NM_003883:c.G884A;p.G295D      |            | 0 D11    |
| chr5  | 1.57E+08 | 1.57E+08 | A | G | exonic          | synonymous SNV ITK         | NM_005546:c.A267G;p.L89L       |            | D11      |
| chr5  | 1.58E+08 | 1.58E+08 | C | A | exonic          | nonsynonymous SN\ EBF1     | NM_024007:c.G1319T;p.S440I     |            | 0.03 D11 |
| chr6  | 73960977 | 73960977 | G | A | exonic          | nonsynonymous SN\ KCNQ5    | NM_001160134:c.G1588A;p.A530T  |            | 1 D11    |
| chr6  | 1.47E+08 | 1.47E+08 | G | A | exonic          | nonsynonymous SN\ GRM1     | NM_000838:c.G2362A;p.A788T     |            | 0.03 D11 |
| chr6  | 1.69E+08 | 1.69E+08 | G | A | exonic          | synonymous SNV THBS2       | NM_003247:c.C3441T;p.G1147G    | rs59953407 | D11      |
| chr7  | 99924803 | 99924803 | C | T | exonic          | nonsynonymous SN\ C7orf51  | NM_173564:c.C1523T;p.P508L     |            | 0 D11    |
| chr7  | 1.03E+08 | 1.03E+08 | A | T | exonic          | nonsynonymous SN\ RELN     | NM_005045:c.T719A;p.V240D      |            | 0 D11    |
| chr7  | 1.14E+08 | 1.14E+08 | G | T | exonic          | nonsynonymous SN\ FOXP2    | NM_148899:c.G312T;p.M104I      |            | 0.02 D11 |
| chr8  | 41909356 | 41909356 | C | A | exonic          | nonsynonymous SN\ MYST3    | NM_006766:c.G5539T;p.G1847W    |            | 0 D11    |
| chr9  | 1.07E+08 | 1.07E+08 | C | A | exonic          | synonymous SNV TAL2        | NM_005421:c.C34A;p.R12R        |            | D11      |
| chr9  | 1.25E+08 | 1.25E+08 | A | G | exonic          | synonymous SNV RC3H2       | NM_001100588:c.T1140C;p.A380A  |            | D11      |
| chr10 | 97086714 | 97086714 | C | T | exonic          | nonsynonymous SN\ SORBS1   | NM_001034954:c.G3193A;p.A1065T |            | 0.02 D11 |
| chr11 | 4860562  | 4860562  | C | T | exonic          | nonsynonymous SN\ OR51T1   | NM_001004759:c.C938T;p.P313L   |            | 0 D11    |
| chr11 | 40093225 | 40093225 | C | T | exonic          | synonymous SNV LRRC4C      | NM_020929:c.G1194A;p.A398A     |            | D11      |
| chr11 | 51268507 | 51268507 | C | T | exonic          | synonymous SNV OR4A5       | NM_001005272:c.G465A;p.A155A   |            | D11      |
| chr11 | 55409760 | 55409760 | G | A | exonic          | nonsynonymous SN\ SPRYD5   | NM_032681:c.G280A;p.G94R       |            | D11      |
| chr11 | 59613806 | 59613806 | C | T | exonic          | nonsynonymous SN\ MS4A2    | NM_000139:c.C122T;p.S41L       |            | 0.29 D11 |
| chr12 | 48230370 | 48230370 | G | A | exonic          | nonsynonymous SN\ KCNH3    | NM_012284:c.G1909A;p.A637T     |            | 0 D11    |
| chr12 | 55110280 | 55110280 | C | T | exonic          | nonsynonymous SN\ TIMELESS | NM_003920:c.G962A;p.R321H      |            | 0.8 D11  |
| chr12 | 77036186 | 77036186 | A | G | exonic          | synonymous SNV NAV3        | NM_014903:c.A3018G;p.G1006G    |            | D11      |
| chr12 | 1.28E+08 | 1.28E+08 | C | A | exonic          | nonsynonymous SN\ TMEM132D | NM_133448:c.G1426T;p.D476Y     |            | 0.05 D11 |
| chr13 | 27899326 | 27899326 | T | G | exonic          | nonsynonymous SN\ FLT1     | NM_001159920:c.A1406C;p.H469P  |            | 0.09 D11 |
| chr13 | 87128364 | 87128364 | G | A | exonic          | nonsynonymous SN\ SLITRK5  | NM_015567:c.G2720A;p.G907E     |            | 0.61 D11 |
| chr14 | 52396087 | 52396087 | C | T | exonic          | nonsynonymous SN\ FERMT2   | NM_006832:c.G1823A;p.R608H     |            | 0 D11    |
| chr15 | 27173807 | 27173807 | C | T | exonic;splicing | nonsynonymous SN\ APBA2    | NM_005503:c.C1250T;p.A417V     |            | 0.05 D11 |
| chr16 | 48322253 | 48322253 | G | A | exonic          | synonymous SNV ZNF423      | NM_015069:c.C207T;p.C69C       |            | D11      |
| chr17 | 7517846  | 7517846  | G | A | exonic          | nonsynonymous SN\ TP53     | NM_001126115:c.C421T;p.R141C   |            | 0 D11    |
| chr17 | 7745005  | 7745005  | A | C | exonic          | nonsynonymous SN\ CHD3     | NM_001005271:c.A3266C;p.N1089T |            | 0 D11    |
| chr17 | 74378605 | 74378605 | C | T | exonic          | nonsynonymous SN\ TIMP2    | NM_003255:c.G310A;p.V104I      |            | 0.58 D11 |
| chr18 | 54355969 | 54355969 | A | C | exonic          | synonymous SNV ALPK2       | NM_052947:c.T2430G;p.G810G     |            | D11      |
| chr18 | 59796577 | 59796577 | T | C | exonic          | synonymous SNV SERPINB8    | NM_001031848:c.T55C;p.L19L     |            | D11      |
| chr19 | 11694306 | 11694306 | C | T | exonic          | nonsynonymous SN\ ZNF823   | NM_001080493:c.G1043A;p.R348Q  |            | 1 D11    |
| chr19 | 49672827 | 49672827 | G | C | exonic          | nonsynonymous SN\ ZNF180   | NM_013256:c.C1711G;p.H571D     |            | 0 D11    |
| chr20 | 856988   | 856988   | G | A | exonic          | synonymous SNV PLCB1       | NM_015192:c.G294A;p.L98L       |            | D11      |
| chr20 | 54460430 | 54460430 | C | T | exonic          | nonsynonymous SN\ CASS4    | NM_001164114:c.C629T;p.A210V   |            | 0.35 D11 |
| chr20 | 60856560 | 60856560 | G | A | exonic          | nonsynonymous SN\ NTSR1    | NM_002531:c.G793A;p.V265I      |            | 0.74 D11 |
| chr22 | 36101314 | 36101314 | G | A | exonic          | synonymous SNV ELFN2       | NM_052906:c.C207T;p.A69A       |            | D11      |
| chr22 | 39027265 | 39027265 | A | G | exonic          | nonsynonymous SN\ TNRC6B   | NM_015088:c.A3772G;p.I1258V    |            | D11      |
| chrX  | 1.01E+08 | 1.01E+08 | G | A | exonic          | nonsynonymous SN\ ARMCX1   | NM_016608:c.G97A;p.E33K        |            | 0.06 D11 |
| chrX  | 1.53E+08 | 1.53E+08 | A | C | exonic          | nonsynonymous SN\ RENBP    | NM_002910:c.T793G;p.F265V      |            | 0 D11    |

|       |          |          |   |   |                 |                   |          |                                |          |
|-------|----------|----------|---|---|-----------------|-------------------|----------|--------------------------------|----------|
| chr1  | 33262636 | 33262636 | C | G | exonic          | synonymous SNV    | AK2      | NM_001199199:c.G213C:p.G71G    | D12      |
| chr1  | 36242569 | 36242569 | G | T | exonic          | nonsynonymous SNV | EIF2C3   | NM_024852:c.G699T:p.Q233H      | 0 D12    |
| chr1  | 70277383 | 70277383 | C | T | exonic          | synonymous SNV    | LRRCC7   | NM_020794:c.C3174T:p.Y1058Y    | D12      |
| chr1  | 86732536 | 86732536 | A | C | exonic          | nonsynonymous SNV | CLCA1    | NM_001285:c.A1759C:p.T587P     | 0.07 D12 |
| chr1  | 1.09E+08 | 1.09E+08 | G | A | exonic          | nonsynonymous SNV | HENMT1   | NM_001102592:c.C304T:p.R102W   | 0 D12    |
| chr1  | 1.49E+08 | 1.49E+08 | T | G | exonic          | nonsynonymous SNV | SETDB1   | NM_001145415:c.T791G:p.V264G   | 0.06 D12 |
| chr1  | 1.52E+08 | 1.52E+08 | T | G | exonic          | nonsynonymous SNV | S100A4   | NM_002961:c.A43C:p.T15P        | 0.06 D12 |
| chr1  | 1.53E+08 | 1.53E+08 | C | T | exonic          | nonsynonymous SNV | SHE      | NM_001010846:c.G667A:p.G223R   | 0.05 D12 |
| chr1  | 1.6E+08  | 1.6E+08  | T | G | splicing        |                   | FCGR2A   |                                | D12      |
| chr1  | 1.7E+08  | 1.7E+08  | A | C | exonic          | nonsynonymous SNV | MYOC     | NM_000261:c.T1169G:p.V390G     | 0.07 D12 |
| chr1  | 1.8E+08  | 1.8E+08  | A | G | exonic          | nonsynonymous SNV | CACNA1E  | NM_000721:c.A481G:p.N161D      | 0 D12    |
| chr1  | 2.26E+08 | 2.26E+08 | T | G | exonic          | synonymous SNV    | ZNF678   | NM_178549:c.T525G:p.T175T      | D12      |
| chr2  | 73535837 | 73535837 | C | A | exonic          | stopgain SNV      | ALMS1    | NM_015120:c.C7578A:p.Y2526X    | 0 D12    |
| chr2  | 1.52E+08 | 1.52E+08 | A | C | exonic          | nonsynonymous SNV | NEB      | NM_001164507:c.T5102G:p.V1701G | 0.01 D12 |
| chr2  | 1.75E+08 | 1.75E+08 | A | C | exonic          | nonsynonymous SNV | GPR155   | NM_152529:c.T2429G:p.V810G     | 0.01 D12 |
| chr2  | 1.75E+08 | 1.75E+08 | A | G | exonic          | nonsynonymous SNV | CHN1     | NM_001025201:c.T1076C:p.L359P  | D12      |
| chr2  | 1.79E+08 | 1.79E+08 | T | G | exonic          | nonsynonymous SNV | TTN      | NM_003319:c.A30204C:p.L10068F  | D12      |
| chr2  | 1.82E+08 | 1.82E+08 | T | A | exonic          | nonsynonymous SNV | CERKL    | NM_001030312:c.A1031T:p.N344I  | 0 D12    |
| chr2  | 1.86E+08 | 1.86E+08 | C | T | exonic          | nonsynonymous SNV | ZNF804A  | NM_194250:c.C455T:p.S152F      | 0 D12    |
| chr2  | 1.86E+08 | 1.86E+08 | T | C | exonic          | nonsynonymous SNV | FSIP2    | NM_173651:c.T5833C:p.S1945P    | D12      |
| chr2  | 1.98E+08 | 1.98E+08 | A | C | splicing        |                   | SF3B1    |                                | D12      |
| chr2  | 2.36E+08 | 2.36E+08 | C | T | exonic;splicing | synonymous SNV    | AGAP1    | NM_001037131:c.C672T:p.D224D   | D12      |
| chr3  | 12760397 | 12760397 | A | C | splicing        |                   | TMEM40   |                                | D12      |
| chr3  | 42756291 | 42756291 | G | C | exonic          | nonsynonymous SNV | CCDC13   | NM_144719:c.C1003G:p.R335G     | 0.16 D12 |
| chr3  | 64574073 | 64574073 | A | C | exonic          | synonymous SNV    | ADAMTS9  | NM_182920:c.T3342G:p.G1114G    | D12      |
| chr3  | 1.03E+08 | 1.03E+08 | C | T | exonic          | nonsynonymous SNV | ZBTB11   | NM_014415:c.G2042A:p.C681Y     | 0 D12    |
| chr3  | 1.25E+08 | 1.25E+08 | C | T | exonic          | nonsynonymous SNV | KALRN    | NM_001024660:c.C5T:p.T2M       | 0 D12    |
| chr3  | 1.85E+08 | 1.85E+08 | T | G | exonic          | nonsynonymous SNV | ALG3     | NM_001006941:c.A199C:p.T67P    | D12      |
| chr3  | 1.87E+08 | 1.87E+08 | C | A | exonic          | nonsynonymous SNV | DGKG     | NM_001080744:c.G490T:p.V164F   | 0 D12    |
| chr4  | 66150338 | 66150338 | T | G | exonic          | nonsynonymous SNV | EPHA5    | NM_004439:c.A526C:p.T176P      | 0 D12    |
| chr4  | 71425203 | 71425203 | C | A | exonic          | nonsynonymous SNV | AMTN     | NM_212557:c.C230A:p.P77H       | 0.5 D12  |
| chr5  | 90122767 | 90122767 | C | T | exonic          | nonsynonymous SNV | GPR98    | NM_032119:c.C14365T:p.R4789W   | D12      |
| chr5  | 1.12E+08 | 1.12E+08 | C | T | exonic          | stopgain SNV      | APC      | NM_001127511:c.C667T:p.R223X   | 0 D12    |
| chr5  | 1.41E+08 | 1.41E+08 | T | G | exonic          | nonsynonymous SNV | PCDHGB1  | NM_018922:c.T2000G:p.V667G     | D12      |
| chr5  | 1.49E+08 | 1.49E+08 | C | T | exonic          | synonymous SNV    | PDGFRB   | NM_002609:c.G780A:p.P260P      | D12      |
| chr6  | 18257329 | 18257329 | A | C | exonic          | synonymous SNV    | TPMT     | NM_000367:c.T9G:p.G3G          | D12      |
| chr6  | 26074866 | 26074866 | A | C | exonic          | nonsynonymous SNV | TRIM38   | NM_006355:c.A137C:p.N46T       | 0.04 D12 |
| chr6  | 47790416 | 47790416 | C | T | exonic          | synonymous SNV    | GPR115   | NM_153838:c.C1476T:p.L492L     | D12      |
| chr6  | 88023408 | 88023408 | T | G | exonic          | nonsynonymous SNV | ZNF292   | NM_015021:c.T3342G:p.S1114R    | 0 D12    |
| chr6  | 1.63E+08 | 1.63E+08 | C | T | exonic          | synonymous SNV    | PARK2    | NM_004562:c.G219A:p.P73P       | D12      |
| chr7  | 22982837 | 22982837 | C | T | exonic;splicing | nonsynonymous SNV | FAM126A  | NM_032581:c.G530A:p.R177Q      | 0 D12    |
| chr7  | 43250044 | 43250044 | G | C | exonic          | synonymous SNV    | HECW1    | NM_015052:c.G15C:p.L5L         | D12      |
| chr7  | 1.03E+08 | 1.03E+08 | G | A | exonic          | synonymous SNV    | RELN     | NM_005045:c.C9531T:p.A3177A    | D12      |
| chr7  | 1.07E+08 | 1.07E+08 | A | C | exonic          | nonsynonymous SNV | GPR22    | NM_005295:c.A92C:p.Y31S        | 0.43 D12 |
| chr8  | 77928742 | 77928742 | C | A | exonic          | nonsynonymous SNV | ZFX4     | NM_024721:c.C7030A:p.Q2344K    | 0.66 D12 |
| chr9  | 35605952 | 35605952 | A | G | exonic          | nonsynonymous SNV | CD72     | NM_001782:c.T676C:p.C226R      | 0 D12    |
| chr9  | 35796395 | 35796395 | T | G | exonic          | synonymous SNV    | NPR2     | NM_003995:c.T2379G:p.G793G     | D12      |
| chr9  | 96919418 | 96919418 | C | T | exonic;splicing | nonsynonymous SNV | FANCC    | NM_000136:c.G1072A:p.D358N     | 0.07 D12 |
| chr9  | 1.35E+08 | 1.35E+08 | T | G | exonic          | nonsynonymous SNV | GTF3C5   | NM_001122823:c.T749G:p.V250G   | 0.54 D12 |
| chr9  | 1.38E+08 | 1.38E+08 | G | A | exonic          | nonsynonymous SNV | QSOX2    | NM_181701:c.C1828T:p.R610C     | D12      |
| chr10 | 49955369 | 49955369 | C | T | exonic          | nonsynonymous SNV | C10orf72 | NM_001031746:c.G535A:p.V179M   | 0.06 D12 |
| chr10 | 60228840 | 60228840 | A | C | exonic          | nonsynonymous SNV | BICC1    | NM_001080512:c.A1547C:p.H516P  | 0.02 D12 |
| chr10 | 97366344 | 97366344 | G | C | exonic          | nonsynonymous SNV | ALDH18A1 | NM_001017423:c.C1479G:p.I493M  | 0.28 D12 |

|       |          |          |   |   |                 |                            |                                |            |     |
|-------|----------|----------|---|---|-----------------|----------------------------|--------------------------------|------------|-----|
| chr10 | 1.02E+08 | 1.02E+08 | T | C | exonic          | nonsynonymous SN\ SEC31B   | NM_015490:c.A278G:p.D93G       | 0.03       | D12 |
| chr10 | 1.03E+08 | 1.03E+08 | A | C | exonic          | nonsynonymous SN\ SEMA4G   | NM_001203244:c.A407C:p.H136P   | 0.25       | D12 |
| chr10 | 1.13E+08 | 1.13E+08 | G | A | exonic          | nonsynonymous SN\ RBM20    | NM_001134363:c.G1252A:p.D418N  | 0.59       | D12 |
| chr11 | 44061689 | 44061689 | A | C | exonic          | nonsynonymous SN\ ACCS     | NM_001127219:c.A1394C:p.H465P  | 0.27       | D12 |
| chr11 | 45943730 | 45943730 | T | G | exonic          | synonymous SNV PHF21A      | NM_001101802:c.A705C:p.R235R   |            | D12 |
| chr11 | 47157629 | 47157629 | T | G | exonic          | nonsynonymous SN\ PACSIN3  | NM_001184974:c.A688C:p.T230P   | 0.06       | D12 |
| chr11 | 62241057 | 62241057 | C | T | exonic          | nonsynonymous SN\ HNRNPUL2 | NM_001079559:c.G1961A:p.R654Q  |            | D12 |
| chr11 | 65523643 | 65523643 | G | A | exonic          | synonymous SNV EIF1AD      | NM_032325:c.C276T:p.H92H       |            | D12 |
| chr11 | 1.05E+08 | 1.05E+08 | A | C | exonic          | nonsynonymous SN\ GRIA4    | NM_000829:c.A2548C:p.T850P     | 0.09       | D12 |
| chr11 | 1.11E+08 | 1.11E+08 | T | G | exonic          | nonsynonymous SN\ FDXACB1  | NM_138378:c.A797C:p.Y266S      | 0.05       | D12 |
| chr11 | 1.25E+08 | 1.25E+08 | T | G | exonic          | nonsynonymous SN\ HYLS1    | NM_001134793:c.T646G:p.Y216D   | 0.03       | D12 |
| chr12 | 25269829 | 25269829 | C | T | exonic          | nonsynonymous SN\ KRAS     | NM_004985:c.G436A:p.A146T      | 0.01       | D12 |
| chr12 | 99542373 | 99542373 | A | C | exonic          | nonsynonymous SN\ GAS2L3   | NM_174942:c.A1659C:p.K553N     | 0          | D12 |
| chr12 | 1.23E+08 | 1.23E+08 | A | G | exonic          | nonsynonymous SN\ DNAH10   | NM_207437:c.A7637G:p.E2546G    |            | D12 |
| chr13 | 85267292 | 85267292 | C | A | exonic          | synonymous SNV SLITRK6     | NM_032229:c.G1353T:p.L451L     |            | D12 |
| chr14 | 63819357 | 63819357 | A | G | exonic          | nonsynonymous SN\ ESR2     | NM_001040275:c.T100C:p.S34P    | 0          | D12 |
| chr14 | 93487143 | 93487143 | C | T | exonic          | nonsynonymous SN\ ASB2     | NM_016150:c.G691A:p.A231T      | 0          | D12 |
| chr15 | 30979470 | 30979470 | A | C | splicing        | FMN1                       |                                |            | D12 |
| chr16 | 21089391 | 21089391 | A | C | exonic          | nonsynonymous SN\ TMEM159  | NM_020422:c.A229C:p.T77P       | 0.27       | D12 |
| chr16 | 23131937 | 23131937 | C | T | exonic          | nonsynonymous SN\ SCNN1G   | NM_001039:c.C1445T:p.P482L     | 0.14       | D12 |
| chr16 | 45287007 | 45287007 | T | G | exonic          | nonsynonymous SN\ ORC6     | NM_014321:c.T482G:p.M161R      | 0.01       | D12 |
| chr16 | 56358343 | 56358343 | T | G | exonic          | nonsynonymous SN\ KIFC3    | NM_001130099:c.A857C:p.Y286S   | 0          | D12 |
| chr16 | 70651784 | 70651784 | C | T | exonic          | nonsynonymous SN\ HP       | NM_001126102:c.C538T:p.H180Y   | 0.04       | D12 |
| chr16 | 82996298 | 82996298 | A | G | exonic          | nonsynonymous SN\ ATP2C2   | NM_014861:c.A274G:p.N92D       | rs75488406 | D12 |
| chr17 | 625832   | 625832   | A | C | exonic          | synonymous SNV GLOD4       | NM_016080:c.T339G:p.G113G      |            | D12 |
| chr17 | 7518937  | 7518937  | G | A | exonic          | stopgain SNV TP53          | NM_001126115:c.C241T:p.R81X    | 0          | D12 |
| chr17 | 10478922 | 10478922 | A | C | exonic          | nonsynonymous SN\ MYH3     | NM_002470:c.T4316G:p.L1439W    | 0.18       | D12 |
| chr17 | 33173716 | 33173716 | C | T | exonic          | nonsynonymous SN\ HNF1B    | NM_000458:c.G372A:p.M124I      | 0.38       | D12 |
| chr17 | 38091551 | 38091551 | G | A | exonic          | nonsynonymous SN\ CNTNAP1  | NM_003632:c.G766A:p.G256R      | 0.02       | D12 |
| chr17 | 62562583 | 62562583 | A | C | exonic          | synonymous SNV HELZ        | NM_014877:c.T3147G:p.G1049G    |            | D12 |
| chr17 | 68865835 | 68865835 | G | A | exonic          | synonymous SNV SDK2        | NM_001144952:c.C5571T:p.Y1857Y |            | D12 |
| chr17 | 71030953 | 71030953 | G | A | exonic          | nonsynonymous SN\ TSEN54   | NM_207346:c.G1255A:p.V419M     | 0.05       | D12 |
| chr17 | 75938763 | 75938763 | C | T | exonic          | nonsynonymous SN\ RNF213   | NM_020914:c.C10303T:p.R3435C   | 0.07       | D12 |
| chr19 | 1751375  | 1751375  | T | G | exonic          | nonsynonymous SN\ ATP8B3   | NM_001178002:c.A1085C:p.D362A  | 0.38       | D12 |
| chr19 | 8934925  | 8934925  | T | G | exonic          | synonymous SNV MUC16       | NM_024690:c.A13521C:p.S4507S   |            | D12 |
| chr19 | 8948873  | 8948873  | G | T | exonic          | nonsynonymous SN\ MUC16    | NM_024690:c.C3942A:p.N1314K    |            | D12 |
| chr19 | 16942714 | 16942714 | T | G | exonic          | synonymous SNV CPAMD8      | NM_015692:c.A2341C:p.R781R     |            | D12 |
| chr19 | 39524815 | 39524815 | A | C | exonic          | synonymous SNV KIAA0355    | NM_014686:c.A2136C:p.T712T     |            | D12 |
| chr19 | 41045683 | 41045683 | T | C | exonic          | nonsynonymous SN\ KIRREL2  | NM_199179:c.T1480C:p.S494P     | 0          | D12 |
| chr19 | 63077895 | 63077895 | G | T | exonic          | synonymous SNV ZNF814      | NM_001144989:c.C675A:p.T225T   |            | D12 |
| chr20 | 10569429 | 10569429 | A | C | splicing        | JAG1                       |                                |            | D12 |
| chr20 | 36385834 | 36385834 | T | G | exonic          | nonsynonymous SN\ BPI      | NM_001725:c.T917G:p.V306G      | 0.33       | D12 |
| chr21 | 41729647 | 41729647 | A | C | exonic          | nonsynonymous SN\ MX1      | NM_001178046:c.A119C:p.N40T    | 0.66       | D12 |
| chrX  | 1.35E+08 | 1.35E+08 | C | A | exonic          | nonsynonymous SN\ GPR112   | NM_153834:c.C5330A:p.A1777D    | 0          | D12 |
| chrX  | 1.38E+08 | 1.38E+08 | T | G | exonic          | nonsynonymous SN\ FGF13    | NM_004114:c.A547C:p.N183H      | 0          | D12 |
| chr1  | 2.14E+08 | 2.14E+08 | G | T | exonic          | nonsynonymous SN\ USH2A    | NM_206933:c.C9874A:p.Q3292K    | 0.36       | D14 |
| chr2  | 27584117 | 27584117 | C | A | exonic          | synonymous SNV GCKR        | NM_001486:c.C1209A:p.I403I     |            | D14 |
| chr5  | 1.71E+08 | 1.71E+08 | G | A | exonic;splicing | synonymous SNV NPM1        | NM_001037738:c.G258A:p.T86T    |            | D14 |
| chr6  | 1.45E+08 | 1.45E+08 | T | C | exonic          | synonymous SNV UTRN        | NM_007124:c.T5985C:p.A1995A    |            | D14 |
| chr7  | 2946070  | 2946070  | G | A | exonic          | nonsynonymous SN\ CARD11   | NM_032415:c.C703T:p.R235W      | 0.01       | D14 |
| chr9  | 1.32E+08 | 1.32E+08 | G | A | exonic          | nonsynonymous SN\ ASS1     | NM_054012:c.G911A:p.R304Q      | 0.01       | D14 |
| chr11 | 7024591  | 7024591  | T | A | exonic          | nonsynonymous SN\ NLRP14   | NM_176822:c.T2075A:p.I692N     | 0.1        | D14 |
| chr11 | 7280905  | 7280905  | G | A | exonic          | nonsynonymous SN\ SYT9     | NM_175733:c.G205A:p.V69M       | 0          | D14 |

|       |          |          |   |   |                 |                   |          |                               |                     |
|-------|----------|----------|---|---|-----------------|-------------------|----------|-------------------------------|---------------------|
| chr11 | 55352095 | 55352095 | C | T | exonic          | synonymous SNV    | OR5L2    | NM_001004739:c.C825T;p.T275T  | D14                 |
| chr11 | 1.19E+08 | 1.19E+08 | T | C | exonic          | nonsynonymous SNV | CBL      | NM_005188:c.T907C;p.W303R     | 0 D14               |
| chr12 | 10869422 | 10869422 | C | T | exonic          | synonymous SNV    | TAS2R10  | NM_023921:c.G714A;p.L238L     | D14                 |
| chr12 | 32684571 | 32684571 | A | C | exonic          | nonsynonymous SNV | FGD4     | NM_139241:c.A2138C;p.Q713P    | 0.02 D14            |
| chr13 | 22722816 | 22722816 | G | A | exonic          | synonymous SNV    | SGCG     | NM_000231:c.G345A;p.A115A     | rs1800352 D14       |
| chr13 | 97626654 | 97626654 | C | T | exonic          | nonsynonymous SNV | RNF113B  | NM_178861:c.G838A;p.A280T     | 0 D14               |
| chr14 | 31631091 | 31631091 | G | A | exonic          | nonsynonymous SNV | ARHGAP5  | NM_001030055:c.G1465A;p.E489K | rs78337553 0.04 D14 |
| chr14 | 77467627 | 77467627 | G | A | exonic          | nonsynonymous SNV | ADCK1    | NM_001142545:c.G1016A;p.R339H | 0.02 D14            |
| chr15 | 20405268 | 20405268 | G | T | exonic          | nonsynonymous SNV | TUBGCP5  | NM_001102610:c.G1465T;p.A489S | 0.61 D14            |
| chr16 | 27400007 | 27400007 | C | T | exonic          | nonsynonymous SNV | GTF3C1   | NM_001520:c.G4090A;p.A1364T   | D14                 |
| chr17 | 7514743  | 7514743  | G | A | exonic          | nonsynonymous SNV | TP53     | NM_001126115:c.C613T;p.R205C  | 0 D14               |
| chr20 | 22964308 | 22964308 | T | G | exonic          | nonsynonymous SNV | SSTR4    | NM_001052:c.T188G;p.V63G      | 0.5 D14             |
| chr20 | 47561096 | 47561096 | G | A | exonic          | nonsynonymous SNV | PTGIS    | NM_000961:c.C1234T;p.P412S    | 0.22 D14            |
| chrX  | 32501648 | 32501648 | T | A | exonic          | stopgain SNV      | DMD      | NM_004007:c.A1363T;p.K455X    | 0.05 D14            |
| chrX  | 66848153 | 66848153 | C | T | exonic          | synonymous SNV    | AR       | NM_000044:c.C2070T;p.H690H    | D14                 |
| chrX  | 1.41E+08 | 1.41E+08 | C | G | exonic          | nonsynonymous SNV | MAGEC1   | NM_005462:c.C1282G;p.P428A    | 0 D14               |
| chrX  | 1.53E+08 | 1.53E+08 | C | T | exonic          | nonsynonymous SNV | IRAK1    | NM_001025242:c.G1177A;p.E393K | 0.01 D14            |
| chr1  | 26260410 | 26260410 | C | T | exonic          | nonsynonymous SNV | TRIM63   | NM_032588:c.G335A;p.R112Q     | 0.26 D13            |
| chr1  | 38256833 | 38256833 | T | G | exonic          | synonymous SNV    | UTP11L   | NM_016037:c.T339G;p.A113A     | D13                 |
| chr1  | 86804272 | 86804272 | A | G | exonic          | nonsynonymous SNV | CLCA4    | NM_012128:c.A935G;p.D312G     | 0 D13               |
| chr1  | 1.11E+08 | 1.11E+08 | A | G | exonic          | nonsynonymous SNV | KCNA3    | NM_002232:c.T1193C;p.L398P    | 0 D13               |
| chr1  | 1.57E+08 | 1.57E+08 | G | A | exonic          | nonsynonymous SNV | CADM3    | NM_001127173:c.G770A;p.R257H  | 0.11 D13            |
| chr2  | 32728766 | 32728766 | C | T | exonic          | nonsynonymous SNV | TTC27    | NM_001193509:c.C452T;p.P151L  | 0 D13               |
| chr2  | 54734436 | 54734436 | G | T | exonic          | nonsynonymous SNV | SPTBN1   | NM_178313:c.G5725T;p.D1909Y   | 0 D13               |
| chr2  | 1.9E+08  | 1.9E+08  | C | G | exonic          | nonsynonymous SNV | COL3A1   | NM_000090:c.C1471G;p.R491G    | 0 D13               |
| chr3  | 10345805 | 10345805 | C | T | exonic          | nonsynonymous SNV | ATP2B2   | NM_001683:c.G3290A;p.R1097H   | 0 D13               |
| chr3  | 49697068 | 49697068 | C | T | exonic          | nonsynonymous SNV | MST1     | NM_020998:c.G1795A;p.A599T    | 0.31 D13            |
| chr3  | 1.02E+08 | 1.02E+08 | A | G | exonic          | nonsynonymous SNV | TOMM70A  | NM_014820:c.T757C;p.S253P     | 0 D13               |
| chr3  | 1.14E+08 | 1.14E+08 | C | A | exonic;splicing | synonymous SNV    | BOC;BOC  | NM_033254:c.C2022A;p.G674G    | D13                 |
| chr3  | 1.73E+08 | 1.73E+08 | C | G | exonic          | nonsynonymous SNV | FNDC3B   | NM_001135095:c.C133G;p.P45A   | 0 D13               |
| chr4  | 69718382 | 69718382 | G | A | exonic          | stopgain SNV      | UGT2B10  | NM_001075:c.G765A;p.W255X     | D13                 |
| chr4  | 1.53E+08 | 1.53E+08 | G | A | exonic          | nonsynonymous SNV | FBXW7    | NM_001013415:c.C1391T;p.S464L | 0.06 D13            |
| chr4  | 1.53E+08 | 1.53E+08 | G | A | exonic          | stopgain SNV      | FBXW7    | NM_001013415:c.C478T;p.R160X  | 0.17 D13            |
| chr4  | 1.64E+08 | 1.64E+08 | G | T | exonic          | synonymous SNV    | NPY1R    | NM_000909:c.C1152A;p.I384I    | D13                 |
| chr5  | 1.12E+08 | 1.12E+08 | C | T | exonic          | stopgain SNV      | APC      | NM_001127511:c.C1636T;p.R546X | 0.01 D13            |
| chr5  | 1.4E+08  | 1.4E+08  | C | T | exonic          | synonymous SNV    | HARS     | NM_002109:c.G1131A;p.V377V    | D13                 |
| chr7  | 1.03E+08 | 1.03E+08 | T | A | exonic          | synonymous SNV    | RELN     | NM_005045:c.A2559T;p.V853V    | D13                 |
| chr7  | 1.42E+08 | 1.42E+08 | G | T | exonic;splicing | nonsynonymous SNV | PRSS1    | NM_002769:c.G593T;p.G198V     | 0.03 D13            |
| chr8  | 14456712 | 14456712 | C | T | exonic          | nonsynonymous SNV | SGCZ     | NM_139167:c.G134A;p.R45Q      | 0 D13               |
| chr8  | 74011488 | 74011488 | C | A | exonic          | nonsynonymous SNV | KCNB2    | NM_004770:c.C1344A;p.S448R    | 0 D13               |
| chr8  | 1.09E+08 | 1.09E+08 | C | T | exonic          | nonsynonymous SNV | RSP02    | NM_178565:c.G482A;p.R161H     | 0.01 D13            |
| chr8  | 1.18E+08 | 1.18E+08 | A | C | exonic          | synonymous SNV    | SLC30A8  | NM_173851:c.A705C;p.A235A     | D13                 |
| chr9  | 1.38E+08 | 1.38E+08 | C | T | exonic          | synonymous SNV    | KCNT1    | NM_020822:c.C3066T;p.Y1022Y   | D13                 |
| chr10 | 25353665 | 25353665 | G | T | exonic          | nonsynonymous SNV | THNSL1   | NM_024838:c.G1507T;p.D503Y    | 0 D13               |
| chr11 | 21551495 | 21551495 | G | A | exonic          | synonymous SNV    | NELL1    | NM_201551:c.G2205A;p.T735T    | D13                 |
| chr11 | 36571539 | 36571539 | C | G | exonic          | nonsynonymous SNV | RAG2     | NM_000536:c.G756C;p.L252F     | 0 D13               |
| chr11 | 40094093 | 40094093 | C | A | exonic          | nonsynonymous SNV | LRRC4C   | NM_020929:c.G326T;p.R109M     | 0.05 D13            |
| chr11 | 65592729 | 65592729 | A | C | exonic          | nonsynonymous SNV | SF3B2    | NM_006842:c.A2625C;p.K875N    | 0.01 D13            |
| chr11 | 1.05E+08 | 1.05E+08 | C | T | exonic          | synonymous SNV    | GRIA4    | NM_001112812:c.C333T;p.S111S  | D13                 |
| chr12 | 56449434 | 56449434 | G | C | exonic          | nonsynonymous SNV | METTL1   | NM_023033:c.C409G;p.R137G     | 0 D13               |
| chr12 | 74023893 | 74023893 | C | A | exonic          | nonsynonymous SNV | GLIPR1L1 | NM_152779:c.C328A;p.P110T     | 0.33 D13            |
| chr12 | 1E+08    | 1E+08    | G | A | exonic          | nonsynonymous SNV | UTP20    | NM_014503:c.G2165A;p.R722H    | 0.02 D13            |
| chr13 | 47549388 | 47549388 | G | C | exonic          | nonsynonymous SNV | MED4     | NM_014166:c.C701G;p.P234R     | 0.04 D13            |

|       |          |          |   |   |                 |                   |           |                               |                    |
|-------|----------|----------|---|---|-----------------|-------------------|-----------|-------------------------------|--------------------|
| chr16 | 2175340  | 2175340  | C | T | exonic          | synonymous SNV    | CASKIN1   | NM_020764:c.G1119A:p.E373E    | D13                |
| chr16 | 54077092 | 54077092 | A | G | exonic          | nonsynonymous SNV | MMP2      | NM_001127891:c.A584G:p.N195S  | 1 D13              |
| chr17 | 7519005  | 7519005  | G | A | exonic          | nonsynonymous SNV | TP53      | NM_001126115:c.C173T:p.P58L   | 0 D13              |
| chr17 | 42724600 | 42724600 | G | A | exonic          | nonsynonymous SNV | ITGB3     | NM_000212:c.G1357A:p.V453I    | rs5921 0.46 D13    |
| chr17 | 57400292 | 57400292 | C | G | exonic          | nonsynonymous SNV | MED13     | NM_005121:c.G4077C:p.M1359I   | 0.05 D13           |
| chr19 | 6446310  | 6446310  | G | A | exonic          | synonymous SNV    | TUBB4     | NM_006087:c.C1200T:p.G400G    | D13                |
| chr19 | 8922146  | 8922146  | G | A | exonic          | nonsynonymous SNV | MUC16     | NM_024690:c.C26300T:p.T8767M  | D13                |
| chr20 | 31337615 | 31337615 | C | G | exonic          | synonymous SNV    | C20orf114 | NM_033197:c.C75G:p.P25P       | D13                |
| chr21 | 29831575 | 29831575 | A | G | exonic          | synonymous SNV    | GRIK1     | NM_175611:c.T2565C:p.C855C    | D13                |
| chrX  | 1.36E+08 | 1.36E+08 | G | A | exonic          | synonymous SNV    | ARHGEF6   | NM_004840:c.C2157T:p.Y719Y    | D13                |
| chr1  | 33931187 | 33931187 | A | C | exonic          | nonsynonymous SNV | CSMD2     | NM_052896:c.T3862G:p.Y1288D   | 0 D10              |
| chr1  | 37118924 | 37118924 | C | T | exonic          | nonsynonymous SNV | GRIK3     | NM_000831:c.G448A:p.V150M     | 0.01 D10           |
| chr1  | 42849242 | 42849242 | A | T | exonic          | stopgain SNV      | CCDC30    | NM_001080850:c.A1390T:p.K464X | 0.06 D10           |
| chr1  | 52078711 | 52078711 | A | C | exonic          | synonymous SNV    | NRD1      | NM_001101662:c.T405G:p.G135G  | D10                |
| chr1  | 1.49E+08 | 1.49E+08 | C | T | exonic          | nonsynonymous SNV | VPS72     | NM_005997:c.G905A:p.R302Q     | 0.38 D10           |
| chr1  | 1.57E+08 | 1.57E+08 | G | A | exonic          | nonsynonymous SNV | OR6N1     | NM_001005185:c.C877T:p.R293C  | 0 D10              |
| chr1  | 1.72E+08 | 1.72E+08 | G | T | exonic          | nonsynonymous SNV | DARS2     | NM_018122:c.G142T:p.V48F      | 0.02 D10           |
| chr1  | 1.95E+08 | 1.95E+08 | C | G | exonic          | nonsynonymous SNV | CFH       | NM_000186:c.C898G:p.P300A     | 0.3 D10            |
| chr1  | 2.24E+08 | 2.24E+08 | C | T | exonic          | nonsynonymous SNV | TMEM63A   | NM_014698:c.G2264A:p.R755Q    | 0.25 D10           |
| chr2  | 10043704 | 10043704 | T | G | exonic;splicing | nonsynonymous SNV | GRHL1     | NM_198182:c.T1112G:p.V371G    | 0 D10              |
| chr2  | 99133458 | 99133458 | G | T | exonic          | nonsynonymous SNV | C2orf15   | NM_144706:c.G107T:p.G36V      | 0 D10              |
| chr2  | 1.05E+08 | 1.05E+08 | T | C | exonic          | nonsynonymous SNV | FHL2      | NM_001450:c.A188G:p.E63G      | 0 D10              |
| chr2  | 1.11E+08 | 1.11E+08 | C | T | exonic          | nonsynonymous SNV | ACOXL     | NM_001142807:c.C764T:p.T255M  | rs1554005 0.14 D10 |
| chr2  | 1.87E+08 | 1.87E+08 | G | A | exonic;splicing | nonsynonymous SNV | FAM171B   | NM_177454:c.G565A:p.D189N     | 0.21 D10           |
| chr3  | 48395932 | 48395932 | G | T | exonic          | synonymous SNV    | FBXW12    | NM_001159927:c.G444T:p.L148L  | D10                |
| chr3  | 1.56E+08 | 1.56E+08 | A | C | exonic          | synonymous SNV    | DHX36     | NM_001114397:c.T915G:p.G305G  | D10                |
| chr4  | 25028389 | 25028389 | A | G | exonic          | nonsynonymous SNV | ANAPC4    | NM_013367:c.A2129G:p.H710R    | 0.85 D10           |
| chr4  | 41379216 | 41379216 | G | A | exonic          | nonsynonymous SNV | LIMCH1    | NM_001112720:c.G2174A:p.R725Q | 0.12 D10           |
| chr4  | 74226383 | 74226383 | T | G | exonic          | synonymous SNV    | ANKRD17   | NM_032217:c.A2271C:p.P757P    | D10                |
| chr4  | 87247424 | 87247424 | G | C | exonic          | synonymous SNV    | MAPK10    | NM_002753:c.C342G:p.L114L     | D10                |
| chr4  | 89746092 | 89746092 | C | G | exonic          | nonsynonymous SNV | HERC3     | NM_014606:c.C95G:p.S32C       | 0.15 D10           |
| chr4  | 1.24E+08 | 1.24E+08 | C | T | exonic          | nonsynonymous SNV | ADAD1     | NM_001159285:c.C86T:p.A29V    | 0.05 D10           |
| chr4  | 1.27E+08 | 1.27E+08 | C | T | exonic          | nonsynonymous SNV | FAT4      | NM_024582:c.C7022T:p.S2341F   | 0.02 D10           |
| chr5  | 52180986 | 52180986 | T | A | exonic          | nonsynonymous SNV | ITGA1     | NM_181501:c.T92A:p.V31D       | 0 D10              |
| chr5  | 1.11E+08 | 1.11E+08 | A | G | exonic          | nonsynonymous SNV | CAMK4     | NM_001744:c.A340G:p.I114V     | 0.16 D10           |
| chr5  | 1.12E+08 | 1.12E+08 | C | A | exonic          | stopgain SNV      | APC       | NM_001127511:c.C455A:p.S152X  | 0.16 D10           |
| chr5  | 1.12E+08 | 1.12E+08 | C | T | exonic          | stopgain SNV      | APC       | NM_001127511:c.C2602T:p.Q868X | 0.01 D10           |
| chr6  | 71355104 | 71355104 | C | T | exonic          | stopgain SNV      | C6orf57   | NM_145267:c.C283T:p.R95X      | 0 D10              |
| chr7  | 2270479  | 2270479  | G | A | exonic          | synonymous SNV    | SNX8      | NM_013321:c.C762T:p.L254L     | D10                |
| chr7  | 66051090 | 66051090 | C | A | exonic          | synonymous SNV    | C7orf42   | NM_017994:c.C570A:p.A190A     | D10                |
| chr7  | 91921887 | 91921887 | A | C | exonic          | nonsynonymous SNV | GATAD1    | NM_021167:c.A571C:p.T191P     | 0.06 D10           |
| chr7  | 1.13E+08 | 1.13E+08 | C | G | exonic          | nonsynonymous SNV | PPP1R3A   | NM_002711:c.G2081C:p.S694T    | 0.02 D10           |
| chr7  | 1.43E+08 | 1.43E+08 | T | G | exonic          | synonymous SNV    | TAS2R60   | NM_177437:c.T225G:p.G75G      | D10                |
| chr7  | 1.47E+08 | 1.47E+08 | C | T | exonic          | synonymous SNV    | CNTNAP2   | NM_014141:c.C1998T:p.S666S    | D10                |
| chr9  | 71661356 | 71661356 | G | A | exonic          | nonsynonymous SNV | C9orf135  | NM_001010940:c.G327A:p.M109I  | 0.72 D10           |
| chr10 | 419992   | 419992   | C | G | exonic          | synonymous SNV    | DIP2C     | NM_014974:c.G1851C:p.L617L    | D10                |
| chr10 | 13679543 | 13679543 | T | G | splicing        |                   | PRPF18    |                               | D10                |
| chr10 | 22730184 | 22730184 | T | C | exonic          | nonsynonymous SNV | SPAG6     | NM_012443:c.T1286C:p.L429P    | 0 D10              |
| chr10 | 60214820 | 60214820 | A | T | exonic          | nonsynonymous SNV | BICC1     | NM_001080512:c.A361T:p.M121L  | 0.26 D10           |
| chr10 | 1.02E+08 | 1.02E+08 | T | G | exonic          | nonsynonymous SNV | ERLIN1    | NM_006459:c.A522C:p.K174N     | 0.02 D10           |
| chr10 | 1.14E+08 | 1.14E+08 | A | C | exonic          | nonsynonymous SNV | GPAM      | NM_020918:c.T1573G:p.F525V    | 0 D10              |
| chr10 | 1.26E+08 | 1.26E+08 | C | T | exonic          | nonsynonymous SNV | CHST15    | NM_015892:c.G1556A:p.R519H    | 0.04 D10           |
| chr11 | 34074670 | 34074670 | C | T | exonic          | stopgain SNV      | CAPRIN1   | NM_005898:c.C1774T:p.Q592X    | 0.2 D10            |



|       |          |          |   |   |                 |                   |           |                                |            |          |
|-------|----------|----------|---|---|-----------------|-------------------|-----------|--------------------------------|------------|----------|
| chr11 | 34909528 | 34909528 | T | G | exonic;splicing | synonymous SNV    | PDHX;PDHX | NM_001135024:c.T117G:p.G39G    |            | D10      |
| chr11 | 35179877 | 35179877 | G | C | exonic          | nonsynonymous SNV | CD44      | NM_001001389:c.G991C:p.E331Q   | 0.01       | D10      |
| chr11 | 55492384 | 55492384 | G | A | exonic          | synonymous SNV    | OR10AG1   | NM_001005491:c.C132T:p.P44P    | rs78226543 | D10      |
| chr11 | 76724962 | 76724962 | G | T | exonic          | nonsynonymous SNV | PAK1      | NM_001128620:c.C1230A:p.F410L  |            | 0 D10    |
| chr11 | 1.06E+08 | 1.06E+08 | C | T | exonic          | nonsynonymous SNV | GUCY1A2   | NM_000855:c.G1307A:p.R436Q     |            | 0.01 D10 |
| chr12 | 25289551 | 25289551 | C | T | exonic          | nonsynonymous SNV | KRAS      | NM_004985:c.G35A:p.G12D        |            | 0 D10    |
| chr12 | 42231228 | 42231228 | G | A | exonic          | synonymous SNV    | ADAMTS20  | NM_025003:c.C204T:p.S68S       |            | D10      |
| chr12 | 48013205 | 48013205 | C | T | exonic          | nonsynonymous SNV | C1QL4     | NM_001008223:c.G616A:p.V206M   |            | 0.1 D10  |
| chr12 | 54502463 | 54502463 | G | T | exonic          | stopgain SNV      | DNAJC14   | NM_032364:c.C1859A:p.S620X     |            | 0 D10    |
| chr12 | 74023926 | 74023926 | A | C | exonic          | nonsynonymous SNV | GLIPR1L1  | NM_152779:c.A361C:p.T121P      |            | 0.24 D10 |
| chr12 | 1.08E+08 | 1.08E+08 | G | A | exonic          | synonymous SNV    | FOXN4     | NM_213596:c.C1416T:p.S472S     |            | D10      |
| chr12 | 1.18E+08 | 1.18E+08 | G | A | exonic          | nonsynonymous SNV | CCDC60    | NM_178499:c.G1354A:p.D452N     |            | 0.49 D10 |
| chr13 | 75276565 | 75276565 | A | G | exonic          | synonymous SNV    | LMO7      | NM_015842:c.A102G:p.R34R       |            | D10      |
| chr14 | 21033287 | 21033287 | A | C | exonic          | synonymous SNV    | TOX4      | NM_014828:c.A1701C:p.S567S     |            | D10      |
| chr14 | 72612826 | 72612826 | A | C | exonic          | synonymous SNV    | RBM25     | NM_021239:c.A153C:p.P51P       |            | D10      |
| chr14 | 76343541 | 76343541 | G | A | exonic          | synonymous SNV    | ANGEL1    | NM_015305:c.C934T:p.L312L      |            | D10      |
| chr14 | 79003500 | 79003500 | T | G | splicing        |                   | NRXN3     |                                |            | D10      |
| chr15 | 23518015 | 23518015 | C | T | exonic          | synonymous SNV    | ATP10A    | NM_024490:c.G1245A:p.T415T     |            | D10      |
| chr15 | 39892546 | 39892546 | C | T | exonic          | synonymous SNV    | MAPKBP1   | NM_001128608:c.C774T:p.C258C   |            | D10      |
| chr15 | 49560405 | 49560405 | C | T | exonic          | nonsynonymous SNV | DMXL2     | NM_001174117:c.G4282A:p.V1428I |            | 0.14 D10 |
| chr15 | 58533145 | 58533145 | T | G | exonic          | synonymous SNV    | NARG2     | NM_001018089:c.A663C:p.P221P   |            | D10      |
| chr15 | 65269924 | 65269924 | C | G | exonic          | nonsynonymous SNV | SMAD3     | NM_001145104:c.C689G:p.S230C   |            | 0 D10    |
| chr15 | 79398852 | 79398852 | T | G | exonic;splicing | nonsynonymous SNV | STARD5    | NM_181900:c.A283C:p.T95P       |            | 0.06 D10 |
| chr16 | 3222862  | 3222862  | A | G | exonic          | nonsynonymous SNV | ZNF200    | NM_001145446:c.T311C:p.V104A   |            | 0 D10    |
| chr16 | 56576865 | 56576865 | C | T | exonic          | synonymous SNV    | TEPP      | NM_199046:c.C747T:p.P249P      |            | D10      |
| chr17 | 7604851  | 7604851  | C | T | exonic          | synonymous SNV    | DNAH2     | NM_020877:c.C2854T:p.L952L     |            | D10      |
| chr17 | 26583935 | 26583935 | C | T | exonic          | nonsynonymous SNV | NF1       | NM_000267:c.C3406T:p.R1136W    |            | 0.02 D10 |
| chr17 | 38306639 | 38306639 | G | A | exonic          | nonsynonymous SNV | G6PC      | NM_000151:c.G220A:p.V74I       |            | 0.17 D10 |
| chr17 | 38434046 | 38434046 | C | T | exonic          | synonymous SNV    | RND2      | NM_005440:c.C507T:p.S169S      |            | D10      |
| chr17 | 38500080 | 38500080 | G | A | exonic          | nonsynonymous SNV | BRCA1     | NM_007297:c.C853T:p.R285W      | rs80357176 | 0 D10    |
| chr17 | 70656355 | 70656355 | C | T | exonic          | synonymous SNV    | HN1       | NM_001002032:c.G63A:p.L21L     |            | D10      |
| chr18 | 30904213 | 30904213 | G | C | exonic          | nonsynonymous SNV | MAPRE2    | NM_014268:c.G179C:p.R60T       |            | 0 D10    |
| chr19 | 10121605 | 10121605 | C | G | exonic          | nonsynonymous SNV | DNMT1     | NM_001379:c.G2257C:p.D753H     |            | 0.32 D10 |
| chr19 | 18640309 | 18640309 | G | A | exonic          | nonsynonymous SNV | KLHL26    | NM_018316:c.G1102A:p.G368R     |            | 0 D10    |
| chr19 | 37664904 | 37664904 | A | C | exonic          | nonsynonymous SNV | DPY19L3   | NM_001172774:c.A2069C:p.N690T  |            | 0.07 D10 |
| chr19 | 56941693 | 56941693 | G | A | exonic          | nonsynonymous SNV | FPR1      | NM_002029:c.C367T:p.R123C      |            | 0.07 D10 |
| chr19 | 61099200 | 61099200 | C | A | exonic          | stopgain SNV      | NLRP13    | NM_176810:c.G3055T:p.E1019X    |            | 0.75 D10 |
| chr19 | 62019810 | 62019810 | G | A | exonic          | synonymous SNV    | PEG3      | NM_001146186:c.C1812T:p.R604R  |            | D10      |
| chr20 | 3050564  | 3050564  | C | G | exonic          | nonsynonymous SNV | UBOX5     | NM_014948:c.G721C:p.E241Q      |            | 0.18 D10 |
| chr20 | 32977666 | 32977666 | T | G | exonic          | synonymous SNV    | ACSS2     | NM_018677:c.T1824G:p.G608G     |            | D10      |
| chr20 | 39467143 | 39467143 | G | A | exonic          | nonsynonymous SNV | CHD6      | NM_032221:c.C7652T:p.P2551L    |            | 0.1 D10  |
| chr21 | 29313453 | 29313453 | G | A | exonic          | nonsynonymous SNV | RWDD2B    | NM_016940:c.C17T:p.S6F         |            | 0 D10    |
| chr21 | 36542638 | 36542638 | C | T | exonic          | nonsynonymous SNV | DOPEY2    | NM_005128:c.C4900T:p.L1634F    |            | 0.03 D10 |
| chr22 | 39903359 | 39903359 | A | T | exonic          | stopgain SNV      | EP300     | NM_001429:c.A5698T:p.K1900X    |            | 0.44 D10 |
| chr22 | 48684099 | 48684099 | T | G | exonic          | nonsynonymous SNV | ALG12     | NM_024105:c.A1052C:p.H351P     |            | 0.05 D10 |
| chrX  | 74410879 | 74410879 | C | G | exonic          | stopgain SNV      | UPRT      | NM_145052:c.C65G:p.S22X        |            | 0.01 D10 |
| chr1  | 30985327 | 30985327 | C | T | exonic          | nonsynonymous SNV | LAPTM5    | NM_006762:c.G303A:p.M101I      |            | 0.04 D16 |
| chr1  | 53704902 | 53704902 | G | A | exonic          | synonymous SNV    | DMRTB1    | NM_033067:c.G1008A:p.S336S     |            | D16      |
| chr1  | 54948395 | 54948395 | C | T | exonic          | nonsynonymous SNV | HEATR8    | NM_001039464:c.C3919T:p.R1307C |            | 0 D16    |
| chr1  | 1.14E+08 | 1.14E+08 | G | A | exonic          | nonsynonymous SNV | DCLRE1B   | NM_022836:c.G731A:p.R244H      |            | 0.08 D16 |
| chr1  | 1.54E+08 | 1.54E+08 | C | T | exonic          | synonymous SNV    | PKLR      | NM_000298:c.G90A:p.G30G        |            | D16      |
| chr1  | 1.56E+08 | 1.56E+08 | C | T | exonic          | synonymous SNV    | CD1A      | NM_001763:c.C789T:p.R263R      |            | D16      |
| chr1  | 1.57E+08 | 1.57E+08 | C | G | exonic          | nonsynonymous SNV | AIM2      | NM_004833:c.G541C:p.V181L      |            | 0 D16    |

|       |          |          |   |   |          |                            |                               |          |
|-------|----------|----------|---|---|----------|----------------------------|-------------------------------|----------|
| chr1  | 1.58E+08 | 1.58E+08 | C | G | exonic   | nonsynonymous SN\ CASQ1    | NM_001231:c.C726G:p.I242M     | D16      |
| chr1  | 1.84E+08 | 1.84E+08 | G | C | exonic   | nonsynonymous SN\ HMCN1    | NM_031935:c.G7396C:p.E2466Q   | 0.19 D16 |
| chr1  | 2.13E+08 | 2.13E+08 | C | T | exonic   | nonsynonymous SN\ SMYD2    | NM_020197:c.C895T:p.R299C     | 0 D16    |
| chr1  | 2.21E+08 | 2.21E+08 | G | A | exonic   | nonsynonymous SN\ DISP1    | NM_032890:c.G1774A:p.E592K    | 0.17 D16 |
| chr1  | 2.45E+08 | 2.45E+08 | G | C | exonic   | nonsynonymous SN\ ZNF670   | NM_001204220:c.C527G:p.P176R  | 0.01 D16 |
| chr2  | 6909206  | 6909206  | T | C | exonic   | nonsynonymous SN\ CMPK2    | NM_207315:c.A1052G:p.H351R    | D16      |
| chr2  | 21087026 | 21087026 | A | G | exonic   | synonymous SNV APOB        | NM_000384:c.T6219C:p.F2073F   | D16      |
| chr3  | 8919081  | 8919081  | A | T | exonic   | nonsynonymous SN\ RAD18    | NM_020165:c.T1151A:p.L384Q    | 0.07 D16 |
| chr3  | 10121210 | 10121210 | G | A | exonic   | synonymous SNV C3orf24     | NM_001164839:c.C249T:p.N83N   | D16      |
| chr3  | 41241117 | 41241117 | C | T | exonic   | nonsynonymous SN\ CTNNB1   | NM_001098209:c.C110T:p.S37F   | 0 D16    |
| chr3  | 58494302 | 58494302 | G | A | exonic   | synonymous SNV ACOX2       | NM_003500:c.C493T:p.L165L     | D16      |
| chr3  | 87110568 | 87110568 | A | C | exonic   | nonsynonymous SN\ VGLL3    | NM_016206:c.T201G:p.D67E      | 0.46 D16 |
| chr3  | 1.27E+08 | 1.27E+08 | G | A | exonic   | synonymous SNV OSBPL11     | NM_022776:c.C363T:p.H121H     | D16      |
| chr3  | 1.27E+08 | 1.27E+08 | G | A | exonic   | nonsynonymous SN\ SLC41A3  | NM_001008486:c.C1202T:p.A401V | 0.08 D16 |
| chr3  | 1.42E+08 | 1.42E+08 | G | T | exonic   | nonsynonymous SN\ TRIM42   | NM_152616:c.G1438T:p.V480F    | 0.07 D16 |
| chr3  | 1.66E+08 | 1.66E+08 | G | T | exonic   | nonsynonymous SN\ SI       | NM_001041:c.C3825A:p.F1275L   | 0.11 D16 |
| chr3  | 1.69E+08 | 1.69E+08 | G | C | exonic   | nonsynonymous SN\ WDR49    | NM_178824:c.C279G:p.H93Q      | 0.34 D16 |
| chr3  | 1.85E+08 | 1.85E+08 | C | T | exonic   | synonymous SNV DVL3        | NM_004423:c.C1125T:p.Y375Y    | D16      |
| chr4  | 41444183 | 41444183 | G | A | exonic   | synonymous SNV PHOX2B      | NM_003924:c.C369T:p.P123P     | D16      |
| chr4  | 91093372 | 91093372 | C | A | exonic   | nonsynonymous SN\ MMRN1    | NM_007351:c.C3467A:p.A1156D   | 0.01 D16 |
| chr4  | 1.55E+08 | 1.55E+08 | G | A | exonic   | synonymous SNV DCHS2       | NM_017639:c.C7221T:p.A2407A   | D16      |
| chr4  | 1.87E+08 | 1.87E+08 | G | T | exonic   | synonymous SNV PDLIM3      | NM_001114107:c.C123A:p.A41A   | D16      |
| chr5  | 37209713 | 37209713 | T | G | exonic   | synonymous SNV C5orf42     | NM_023073:c.A6072C:p.T2024T   | D16      |
| chr5  | 45303035 | 45303035 | C | G | exonic   | nonsynonymous SN\ HCN1     | NM_021072:c.G1696C:p.V566L    | 0.12 D16 |
| chr5  | 1.4E+08  | 1.4E+08  | C | G | exonic   | nonsynonymous SN\ PCDHB3   | NM_018937:c.C213G:p.N71K      | 0.34 D16 |
| chr5  | 1.41E+08 | 1.41E+08 | C | T | exonic   | synonymous SNV PCDHGA6     | NM_018919:c.C1545T:p.Y515Y    | D16      |
| chr5  | 1.57E+08 | 1.57E+08 | G | A | exonic   | nonsynonymous SN\ SOX30    | NM_178424:c.C2129T:p.P710L    | 0 D16    |
| chr5  | 1.76E+08 | 1.76E+08 | G | C | exonic   | synonymous SNV UIMC1       | NM_001199298:c.C387G:p.T129T  | 0 D16    |
| chr6  | 14085935 | 14085935 | C | A | exonic   | stopgain SNV RNF182        | NM_001165033:c.C606A:p.Y202X  | 0 D16    |
| chr6  | 37294220 | 37294220 | T | C | exonic   | nonsynonymous SN\ TMEM217  | NM_001162900:c.A565G:p.S189G  | 0.05 D16 |
| chr6  | 90775130 | 90775130 | C | T | exonic   | nonsynonymous SN\ BACH2    | NM_0011170794:c.G155A:p.R52Q  | 0 D16    |
| chr6  | 1.12E+08 | 1.12E+08 | C | G | exonic   | nonsynonymous SN\ REV3L    | NM_002912:c.G2804C:p.S935T    | 0 D16    |
| chr6  | 1.53E+08 | 1.53E+08 | G | A | exonic   | nonsynonymous SN\ SYNE1    | NM_033071:c.C8564T:p.A2855V   | 0.04 D16 |
| chr6  | 1.69E+08 | 1.69E+08 | G | A | exonic   | nonsynonymous SN\ THBS2    | NM_003247:c.C175T:p.R59C      | 0.02 D16 |
| chr7  | 77600225 | 77600225 | G | T | exonic   | synonymous SNV MAGI2       | NM_012301:c.C3120A:p.A1040A   | D16      |
| chr7  | 87325932 | 87325932 | A | T | exonic   | nonsynonymous SN\ SLC25A40 | NM_018843:c.T47A:p.L16H       | 0 D16    |
| chr8  | 8234537  | 8234537  | G | A | exonic   | synonymous SNV SGK223      | NM_001080826:c.C2181T:p.S727S | D16      |
| chr8  | 35744076 | 35744076 | C | T | exonic   | stopgain SNV UNC5D         | NM_080872:c.C2428T:p.Q810X    | 0 D16    |
| chr8  | 70650803 | 70650803 | G | A | exonic   | nonsynonymous SN\ SULF1    | NM_001128204:c.G217A:p.G73R   | 0.17 D16 |
| chr8  | 99510194 | 99510194 | T | A | exonic   | nonsynonymous SN\ KCNS2    | NM_020697:c.T811A:p.F271I     | 0.07 D16 |
| chr8  | 1.11E+08 | 1.11E+08 | C | T | exonic   | nonsynonymous SN\ SYBU     | NM_001099746:c.G43A:p.E15K    | D16      |
| chr9  | 16425896 | 16425896 | G | A | exonic   | nonsynonymous SN\ BNC2     | NM_017637:c.C2296T:p.P766S    | 0 D16    |
| chr9  | 95447874 | 95447874 | G | A | exonic   | nonsynonymous SN\ PHF2     | NM_005392:c.G442A:p.D148N     | 0.13 D16 |
| chr9  | 1.34E+08 | 1.34E+08 | C | A | exonic   | nonsynonymous SN\ MED27    | NM_004269:c.G736T:p.A246S     | 0 D16    |
| chr10 | 5824245  | 5824245  | G | A | exonic   | nonsynonymous SN\ C10orf18 | NM_017782:c.G2507A:p.R836H    | 0.16 D16 |
| chr10 | 30655437 | 30655437 | A | G | exonic   | nonsynonymous SN\ MTPAP    | NM_018109:c.T914C:p.I305T     | 0 D16    |
| chr10 | 60699744 | 60699744 | A | G | exonic   | nonsynonymous SN\ FAM13C   | NM_001001971:c.T724C:p.S242P  | 0.09 D16 |
| chr10 | 88662005 | 88662005 | C | T | exonic   | nonsynonymous SN\ BMPR1A   | NM_004329:c.C559T:p.R187C     | 0.06 D16 |
| chr10 | 1.08E+08 | 1.08E+08 | C | T | splicing | SORCS1                     |                               | D16      |
| chr11 | 2390055  | 2390055  | A | G | exonic   | nonsynonymous SN\ TRPM5    | NM_014555:c.T2360C:p.F787S    | 0.01 D16 |
| chr11 | 49930590 | 49930590 | G | C | exonic   | nonsynonymous SN\ OR4C13   | NM_001001955:c.G40C:p.G14R    | 0 D16    |
| chr11 | 55363000 | 55363000 | A | C | exonic   | nonsynonymous SN\ OR5D16   | NM_001005496:c.A197C:p.N66T   | 0.13 D16 |
| chr11 | 55518607 | 55518607 | T | C | exonic   | nonsynonymous SN\ OR5F1    | NM_003697:c.A71G:p.Q24R       | 0.08 D16 |

|       |          |          |   |   |                 |                   |           |                                |             |      |     |
|-------|----------|----------|---|---|-----------------|-------------------|-----------|--------------------------------|-------------|------|-----|
| chr11 | 59988349 | 59988349 | G | A | exonic          | nonsynonymous SN\ | MS4A1     | NM_021950:c.G292A:p.G98R       | 0           | D16  |     |
| chr11 | 66955434 | 66955434 | C | A | exonic          | nonsynonymous SN\ | RPS6KB2   | NM_003952:c.C329A:p.A110D      | 0.02        | D16  |     |
| chr11 | 85086670 | 85086670 | C | T | exonic;splicing | nonsynonymous SN\ | SYTL2     | NM_032379:c.G779A:p.C260Y      | 0           | D16  |     |
| chr11 | 1.24E+08 | 1.24E+08 | A | T | exonic          | nonsynonymous SN\ | OR8A1     | NM_001005194:c.A419T:p.Y140F   | 0.02        | D16  |     |
| chr12 | 6822655  | 6822655  | C | A | exonic          | nonsynonymous SN\ | GNB3      | NM_002075:c.C260A:p.T87N       | 0.06        | D16  |     |
| chr12 | 25289548 | 25289548 | C | T | exonic          | nonsynonymous SN\ | KRAS      | NM_004985:c.G38A:p.G13D        | rs112445441 | 0    | D16 |
| chr12 | 26472196 | 26472196 | G | A | exonic          | nonsynonymous SN\ | ITPR2     | NM_002223:c.C6862T;p.R2288W    | rs61751236  |      | D16 |
| chr12 | 47374464 | 47374464 | G | C | exonic          | nonsynonymous SN\ | CCNT1     | NM_001240:c.C800G:p.T267R      |             | 0.01 | D16 |
| chr12 | 47457753 | 47457753 | C | T | exonic          | nonsynonymous SN\ | ADCY6     | NM_015270:c.G1048A:p.V350I     |             | 0    | D16 |
| chr12 | 48010571 | 48010571 | G | A | exonic          | nonsynonymous SN\ | TROAP     | NM_005480:c.G1676A:p.C559Y     |             | 0.02 | D16 |
| chr12 | 48010580 | 48010580 | G | T | exonic          | nonsynonymous SN\ | TROAP     | NM_005480:c.G1685T:p.S562I     |             | 0.2  | D16 |
| chr12 | 68290841 | 68290841 | G | A | exonic          | synonymous SNV    | LRRRC10   | NM_201550:c.C45T;p.D15D        |             |      | D16 |
| chr12 | 1.12E+08 | 1.12E+08 | G | A | exonic          | nonsynonymous SN\ | SDSL      | NM_138432:c.G757A:p.E253K      |             | 0.29 | D16 |
| chr14 | 44749346 | 44749346 | C | G | exonic          | nonsynonymous SN\ | MIS18BP1  | NM_018353:c.G3139C:p.G1047R    |             | 0.05 | D16 |
| chr15 | 22474447 | 22474447 | G | A | exonic          | synonymous SNV    | C15orf2   | NM_018958:c.G2340A:p.P780P     |             |      | D16 |
| chr15 | 64394510 | 64394510 | T | A | exonic          | synonymous SNV    | DIS3L     | NM_001143688:c.T897A:p.L299L   |             |      | D16 |
| chr15 | 81037189 | 81037189 | G | C | exonic          | synonymous SNV    | CPEB1     | NM_001079535:c.C114G:p.T38T    |             |      | D16 |
| chr16 | 2069400  | 2069400  | C | T | exonic          | nonsynonymous SN\ | TSC2      | NM_001077183:c.C3122T;p.S1041L |             | 0.08 | D16 |
| chr17 | 11637562 | 11637562 | A | G | exonic          | synonymous SNV    | DNAH9     | NM_001372:c.A8079G:p.S2693S    |             |      | D16 |
| chr17 | 37031453 | 37031453 | C | T | exonic          | nonsynonymous SN\ | KRT17     | NM_000422:c.G752A:p.R251H      |             | 0    | D16 |
| chr17 | 40346670 | 40346670 | A | G | exonic          | synonymous SNV    | GFAP      | NM_001131019:c.T570C:p.I190I   |             |      | D16 |
| chr17 | 40688328 | 40688328 | T | A | exonic          | nonsynonymous SN\ | C17orf46  | NM_152343:c.A1004T:p.K335I     |             | 0.04 | D16 |
| chr17 | 46096073 | 46096073 | C | T | exonic          | nonsynonymous SN\ | ABCC3     | NM_001144070:c.C1031T;p.A344V  |             | 0.27 | D16 |
| chr18 | 7039206  | 7039206  | G | A | exonic          | synonymous SNV    | LAMA1     | NM_005559:c.C639T:p.P213P      |             |      | D16 |
| chr18 | 8815400  | 8815400  | G | A | exonic          | nonsynonymous SN\ | KIAA0802  | NM_015210:c.G3892A:p.G1298S    |             | 0.25 | D16 |
| chr18 | 21866494 | 21866494 | C | T | exonic;splicing | nonsynonymous SN\ | SS18;SS18 | NM_005637:c.G1004A:p.G335D     |             | 0.01 | D16 |
| chr18 | 22293794 | 22293794 | G | A | exonic          | stopgain SNV      | KCTD1     | NM_001136205:c.C403T:p.R135X   |             | 0.31 | D16 |
| chr18 | 28102596 | 28102596 | G | A | exonic          | nonsynonymous SN\ | FAM59A    | NM_022751:c.C1864T:p.R622W     |             | 0.01 | D16 |
| chr19 | 10769188 | 10769188 | C | G | exonic          | synonymous SNV    | DNM2      | NM_001005361:c.C1329G:p.A443A  |             |      | D16 |
| chr19 | 12048319 | 12048319 | A | G | exonic          | nonsynonymous SN\ | ZNF844    | NM_001136501:c.A1384G:p.T462A  |             |      | D16 |
| chr19 | 19200012 | 19200012 | T | G | exonic          | synonymous SNV    | NCAN      | NM_004386:c.T2583G;p.P861P     |             |      | D16 |
| chr19 | 21399366 | 21399366 | A | G | exonic          | nonsynonymous SN\ | ZNF493    | NM_175910:c.A1681G:p.K561E     |             | 1    | D16 |
| chr19 | 60927287 | 60927287 | A | C | exonic          | stopgain SNV      | NLRP9     | NM_176820:c.T2030G;p.L677X     |             | 0.02 | D16 |
| chr19 | 62881219 | 62881219 | C | A | exonic          | synonymous SNV    | ZSCAN4    | NM_152677:c.C522A:p.P174P      |             |      | D16 |
| chr20 | 47423872 | 47423872 | G | A | exonic          | synonymous SNV    | KCNB1     | NM_004975:c.C1632T:p.I544I     |             |      | D16 |
| chr20 | 57980432 | 57980432 | T | G | exonic          | stopgain SNV      | CDH26     | NM_177980:c.T252G;p.Y84X       |             | 0.26 | D16 |
| chr22 | 21173398 | 21173398 | G | A | exonic          | nonsynonymous SN\ | ZNF280B   | NM_080764:c.C326T;p.S109L      |             | 0.22 | D16 |
| chr22 | 22782697 | 22782697 | G | A | exonic          | nonsynonymous SN\ | CABIN1    | NM_001201429:c.G986A:p.R329Q   |             | 0.02 | D16 |
| chrX  | 14772553 | 14772553 | A | C | exonic          | nonsynonymous SN\ | FANCB     | NM_152633:c.T2158G;p.Y720D     |             | 0    | D16 |
| chrX  | 19320455 | 19320455 | T | G | exonic          | nonsynonymous SN\ | MAP3K15   | NM_001001671:c.A2252C;p.K751T  |             | 0    | D16 |
| chrX  | 34872658 | 34872658 | C | T | exonic          | synonymous SNV    | FAM47B    | NM_152631:c.C1789T;p.L597L     |             |      | D16 |
| chr1  | 11097007 | 11097007 | C | T | exonic          | nonsynonymous SN\ | MTOR      | NM_004958:c.G7255A:p.E2419K    |             | 0    | D6  |
| chr1  | 70250192 | 70250192 | A | G | exonic          | nonsynonymous SN\ | LRRRC7    | NM_020794:c.A1015G:p.R339G     |             | 0.2  | D6  |
| chr1  | 1.44E+08 | 1.44E+08 | G | A | exonic          | nonsynonymous SN\ | PDE4DIP   | NM_001198832:c.C62T;p.T21M     | rs7547485   | 0    | D6  |
| chr1  | 1.48E+08 | 1.48E+08 | C | T | exonic          | nonsynonymous SN\ | MTMR11    | NM_181873:c.G401A:p.R134Q      |             | 0.03 | D6  |
| chr1  | 1.58E+08 | 1.58E+08 | C | T | exonic          | nonsynonymous SN\ | ATP1A4    | NM_144699:c.C1427T:p.A476V     |             | 0.28 | D6  |
| chr1  | 1.59E+08 | 1.59E+08 | T | G | exonic          | nonsynonymous SN\ | ITLN1     | NM_017625:c.A588C;p.E196D      |             | 0.62 | D6  |
| chr1  | 1.66E+08 | 1.66E+08 | T | G | exonic          | nonsynonymous SN\ | GPR161    | NM_153832:c.A631C:p.I211L      |             | 0    | D6  |
| chr1  | 1.75E+08 | 1.75E+08 | T | C | exonic          | nonsynonymous SN\ | ASTN1     | NM_004319:c.A772G;p.M258V      |             | 0    | D6  |
| chr1  | 2.1E+08  | 2.1E+08  | T | G | exonic          | nonsynonymous SN\ | DTL       | NM_016448:c.T451G;p.F151V      |             | 0.29 | D6  |
| chr2  | 21081676 | 21081676 | C | T | exonic          | nonsynonymous SN\ | APOB      | NM_000384:c.G11569A:p.V3857M   |             | 0.11 | D6  |
| chr2  | 48760046 | 48760046 | C | A | exonic          | nonsynonymous SN\ | GTF2A1L   | NM_001193487:c.C1296A:p.D432E  |             | 0.14 | D6  |
| chr2  | 1.63E+08 | 1.63E+08 | C | T | exonic          | synonymous SNV    | IFIH1     | NM_022168:c.G2199A:p.A733A     |             |      | D6  |

|       |          |          |   |   |                 |                   |          |                                       |      |     |
|-------|----------|----------|---|---|-----------------|-------------------|----------|---------------------------------------|------|-----|
| chr3  | 1.17E+08 | 1.17E+08 | T | C | exonic          | nonsynonymous SN\ | LSAMP    | NM_002338:c.A406G:p.N136D             | 0.36 | D6  |
| chr3  | 1.31E+08 | 1.31E+08 | T | C | exonic          | nonsynonymous SN\ | IFT122   | NM_052990:c.T1783C:p.F595L rs73204230 | 0.01 | D6  |
| chr4  | 1.53E+08 | 1.53E+08 | C | A | exonic          | nonsynonymous SN\ | FBXW7    | NM_001013415:c.G1646T:p.G549V         | 0.01 | D6  |
| chr4  | 1.53E+08 | 1.53E+08 | G | A | exonic          | stopgain SNV      | FBXW7    | NM_001013415:c.C1618T:p.R540X         | 0.12 | D6  |
| chr4  | 1.55E+08 | 1.55E+08 | G | T | exonic          | nonsynonymous SN\ | DCHS2    | NM_017639:c.C6383A:p.T2128K           | 0.03 | D6  |
| chr4  | 1.57E+08 | 1.57E+08 | C | T | exonic          | stopgain SNV      | GUCY1A3  | NM_001130684:c.C1840T:p.R614X         | 0.25 | D6  |
| chr5  | 13912561 | 13912561 | C | T | exonic;splicing | synonymous SNV    | DNAH5    | NM_001369:c.G4950A:p.K1650K           |      | D6  |
| chr5  | 1.12E+08 | 1.12E+08 | C | T | exonic          | stopgain SNV      | APC      | NM_001127511:c.C2572T:p.R858X         | 0.03 | D6  |
| chr5  | 1.22E+08 | 1.22E+08 | G | A | exonic;splicing | nonsynonymous SN\ | SNX24    | NM_014035:c.G442A:p.D148N             | 0.39 | D6  |
| chr5  | 1.53E+08 | 1.53E+08 | T | A | exonic          | synonymous SNV    | GRIA1    | NM_000827:c.T1374A:p.I458I            |      | D6  |
| chr6  | 52957271 | 52957271 | C | G | exonic          | nonsynonymous SN\ | GSTA4    | NM_001512:c.G364C:p.V122L             | 0.11 | D6  |
| chr6  | 70005744 | 70005744 | C | T | exonic          | nonsynonymous SN\ | BAI3     | NM_001704:c.C2719T:p.R907C            | 0    | D6  |
| chr6  | 1.45E+08 | 1.45E+08 | T | G | splicing        |                   | UTRN     |                                       |      | D6  |
| chr6  | 1.51E+08 | 1.51E+08 | C | T | exonic          | stopgain SNV      | PLEKHG1  | NM_001029884:c.C1636T:p.R546X         | 0    | D6  |
| chr6  | 1.66E+08 | 1.66E+08 | A | G | exonic          | nonsynonymous SN\ | PDE10A   | NM_001130690:c.T2185C:p.F729L         | 0    | D6  |
| chr7  | 31871143 | 31871143 | A | T | exonic          | nonsynonymous SN\ | PDE1C    | NM_001191056:c.T688A:p.L230I          | 0.33 | D6  |
| chr7  | 44981715 | 44981715 | T | G | exonic          | nonsynonymous SN\ | MYO1G    | NM_033054:c.A457C:p.T153P             | 0    | D6  |
| chr7  | 98353062 | 98353062 | C | T | exonic          | nonsynonymous SN\ | TRRAP    | NM_003496:c.C2446T:p.R816W            | 0    | D6  |
| chr7  | 1.5E+08  | 1.5E+08  | T | G | exonic;splicing | nonsynonymous SN\ | NOS3     | NM_001160109:c.T584G:p.V195G          | 0    | D6  |
| chr8  | 1.13E+08 | 1.13E+08 | C | T | exonic          | synonymous SNV    | CSMD3    | NM_052900:c.G6642A:p.G2214G           |      | D6  |
| chr9  | 1.07E+08 | 1.07E+08 | G | A | exonic          | synonymous SNV    | ABCA1    | NM_005502:c.C252T:p.Y84Y              |      | D6  |
| chr9  | 1.21E+08 | 1.21E+08 | G | T | exonic          | nonsynonymous SN\ | DBC1     | NM_014618:c.C334A:p.P112T             | 0.08 | D6  |
| chr10 | 87472864 | 87472864 | C | T | exonic          | nonsynonymous SN\ | GRID1    | NM_017551:c.G1873A:p.V625M            | 0.1  | D6  |
| chr10 | 1.18E+08 | 1.18E+08 | C | T | exonic          | nonsynonymous SN\ | C10orf96 | NM_198515:c.C50T:p.A17V               | 0.24 | D6  |
| chr11 | 19207828 | 19207828 | G | A | exonic          | nonsynonymous SN\ | E2F8     | NM_024680:c.C1642T:p.H548Y            | 0.34 | D6  |
| chr12 | 14555572 | 14555572 | C | G | exonic          | nonsynonymous SN\ | PLBD1    | NM_024829:c.G1075C:p.D359H            | 0.01 | D6  |
| chr12 | 22246085 | 22246085 | T | A | exonic          | nonsynonymous SN\ | ST8SIA1  | NM_003034:c.A739T:p.T247S             | 0.53 | D6  |
| chr12 | 41146361 | 41146361 | C | A | exonic          | nonsynonymous SN\ | PRICKLE1 | NM_001144881:c.G677T:p.G226V          | 0    | D6  |
| chr13 | 37052111 | 37052111 | A | C | exonic          | nonsynonymous SN\ | POSTN    | NM_001135934:c.T1547G:p.L516R         | 0    | D6  |
| chr14 | 32363376 | 32363376 | T | C | exonic          | synonymous SNV    | AKAP6    | NM_004274:c.T6606C:p.S2202S           |      | D6  |
| chr14 | 74585782 | 74585782 | C | T | exonic          | synonymous SNV    | MLH3     | NM_001040108:c.G330A:p.S110S          |      | D6  |
| chr15 | 67106043 | 67106043 | G | T | exonic          | stopgain SNV      | NOX5     | NM_001184779:c.G172T:p.E58X           |      | D6  |
| chr16 | 75882776 | 75882776 | C | T | exonic          | nonsynonymous SN\ | ADAMTS18 | NM_199355:c.G3290A:p.R1097H           | 0.16 | D6  |
| chr16 | 82650479 | 82650479 | T | G | exonic          | nonsynonymous SN\ | MBTPS1   | NM_003791:c.A2760C:p.K920N            | 0.11 | D6  |
| chr17 | 7518988  | 7518988  | G | A | exonic          | stopgain SNV      | TP53     | NM_001126115:c.C190T:p.R64X           | 0    | D6  |
| chr17 | 55358661 | 55358661 | C | T | exonic          | synonymous SNV    | RPS6KB1  | NM_003161:c.C465T:p.I155I             |      | D6  |
| chr19 | 59175002 | 59175002 | T | G | exonic          | nonsynonymous SN\ | CACNG8   | NM_031895:c.T437G:p.V146G             | 0.05 | D6  |
| chr20 | 10551310 | 10551310 | G | A | exonic          | synonymous SNV    | C20orf94 | NM_001009608:c.G510A:p.V170V          |      | D6  |
| chr20 | 21294273 | 21294273 | A | T | exonic          | nonsynonymous SN\ | XRN2     | NM_012255:c.A2387T:p.K796M            | 0.05 | D6  |
| chr22 | 41772509 | 41772509 | C | T | exonic          | synonymous SNV    | TLL1     | NM_012263:c.G993A:p.P331P             |      | D6  |
| chrX  | 9637344  | 9637344  | G | A | exonic          | synonymous SNV    | TBL1X    | NM_001139467:c.G1140A:p.S380S         |      | D6  |
| chrX  | 54176975 | 54176975 | G | A | exonic          | nonsynonymous SN\ | FAM120C  | NM_017848:c.C1846T:p.R616W            | 0.01 | D6  |
| chrX  | 71275502 | 71275502 | G | A | exonic          | nonsynonymous SN\ | NHSL2    | NM_001013627:c.G1379A:p.R460H         | 0    | D6  |
| chrX  | 1.1E+08  | 1.1E+08  | G | A | exonic          | nonsynonymous SN\ | CAPN6    | NM_014289:c.C1330T:p.R444C            | 0.01 | D6  |
| chr1  | 27299670 | 27299670 | C | T | exonic          | synonymous SNV    | SLC9A1   | NM_003047:c.G2163A:p.P721P            |      | D17 |
| chr1  | 2.46E+08 | 2.46E+08 | A | C | exonic          | nonsynonymous SN\ | OR2L2    | NM_001004686:c.A8C:p.N3T              | 0.71 | D17 |
| chr5  | 76749965 | 76749965 | C | T | exonic          | synonymous SNV    | PDE8B    | NM_001029851:c.C1776T:p.T592T         |      | D17 |
| chr5  | 1.12E+08 | 1.12E+08 | C | T | exonic          | stopgain SNV      | APC      | NM_001127511:c.C4078T:p.Q1360X        | 0.03 | D17 |
| chr6  | 1.45E+08 | 1.45E+08 | G | A | exonic          | synonymous SNV    | UTRN     | NM_007124:c.G7815A:p.L2605L           |      | D17 |
| chr10 | 27364257 | 27364257 | C | T | exonic          | nonsynonymous SN\ | ANKRD26  | NM_014915:c.G3128A:p.R1043H           | 0.29 | D17 |
| chr10 | 1.14E+08 | 1.14E+08 | T | G | exonic          | nonsynonymous SN\ | ACSL5    | NM_016234:c.T772G:p.F258V             | 0.27 | D17 |
| chr12 | 214594   | 214594   | C | T | exonic          | nonsynonymous SN\ | SLC6A13  | NM_001190997:c.G478A:p.G160R          | 0    | D17 |
| chr14 | 37748734 | 37748734 | G | A | exonic          | nonsynonymous SN\ | SSTR1    | NM_001049:c.G389A:p.C130Y             | 0    | D17 |

|       |          |          |   |   |          |                             |                                          |      |     |
|-------|----------|----------|---|---|----------|-----------------------------|------------------------------------------|------|-----|
| chr20 | 18091388 | 18091388 | A | T | exonic   | nonsynonymous SN\ CSR2BP    | NM_020536:c.A1470T;p.R490S               | 0    | D17 |
| chr20 | 54407659 | 54407659 | T | A | exonic   | nonsynonymous SN\ CSTF1     | NM_001033521:c.T875A;p.V292D             | 0    | D17 |
| chrX  | 1.41E+08 | 1.41E+08 | G | T | exonic   | nonsynonymous SN\ MAGEC1    | NM_005462:c.G2673T;p.L891F               | 0.04 | D17 |
| chr1  | 50439218 | 50439218 | C | T | exonic   | synonymous SNV ELAVL4       | NM_001144774:c.C882T;p.S294S             |      | D18 |
| chr1  | 1.11E+08 | 1.11E+08 | C | T | exonic   | stopgain SNV CD53           | NM_000560:c.C493T;p.R165X                | 0.44 | D18 |
| chr1  | 2.46E+08 | 2.46E+08 | G | A | exonic   | nonsynonymous SN\ OR2W3     | NM_001001957:c.G100A;p.A34T              | 0.19 | D18 |
| chr2  | 47455890 | 47455890 | G | T | exonic   | stopgain SNV EPCAM          | NM_002354:c.G439T;p.E147X                | 0.11 | D18 |
| chr2  | 48789625 | 48789625 | C | A | exonic   | stopgain SNV LHCGR          | NM_000233:c.G646T;p.G216X                | 0.02 | D18 |
| chr2  | 53846193 | 53846193 | G | C | exonic   | stopgain SNV ASB3           | NM_001164165:c.C135G;p.Y45X              |      | D18 |
| chr2  | 1.65E+08 | 1.65E+08 | C | A | exonic   | stoploss SNV SLC38A11       | NM_173512:c.G1154T;p.X385L               | 0.96 | D18 |
| chr3  | 10376651 | 10376651 | G | A | exonic   | nonsynonymous SN\ ATP2B2    | NM_001683:c.C1681T;p.R561C               | 0    | D18 |
| chr3  | 31700200 | 31700200 | G | A | exonic   | synonymous SNV OSBPL10      | NM_001174060:c.C1464T;p.C488C rs17849744 |      | D18 |
| chr3  | 1.11E+08 | 1.11E+08 | C | G | exonic   | nonsynonymous SN\ DPPA4     | NM_018189:c.G289C;p.D97H                 | 0    | D18 |
| chr3  | 1.6E+08  | 1.6E+08  | G | T | exonic   | synonymous SNV MLF1         | NM_022443:c.G15T;p.L5L                   |      | D18 |
| chr3  | 1.62E+08 | 1.62E+08 | G | A | exonic   | nonsynonymous SN\ SMC4      | NM_005496:c.G3790A;p.G1264R              | 0    | D18 |
| chr4  | 74146404 | 74146404 | G | A | exonic   | nonsynonymous SN\ COX18     | NM_173827:c.C818T;p.T273M                | 0.01 | D18 |
| chr5  | 1.38E+08 | 1.38E+08 | G | T | exonic   | nonsynonymous SN\ CTNNA1    | NM_001903:c.G1290T;p.L430F               | 0.01 | D18 |
| chr5  | 1.41E+08 | 1.41E+08 | C | T | exonic   | nonsynonymous SN\ PCDHGA7   | NM_018920:c.C2282T;p.A761V               |      | D18 |
| chr6  | 1.19E+08 | 1.19E+08 | G | A | exonic   | nonsynonymous SN\ MCM9      | NM_017696:c.C364T;p.H122Y                | 0.7  | D18 |
| chr7  | 3648167  | 3648167  | G | A | exonic   | nonsynonymous SN\ SDK1      | NM_152744:c.G617A;p.R206H                | 1    | D18 |
| chr7  | 48422600 | 48422600 | G | A | exonic   | nonsynonymous SN\ ABCA13    | NM_152701:c.G12170A;p.S4057N             |      | D18 |
| chr7  | 1.32E+08 | 1.32E+08 | G | T | exonic   | nonsynonymous SN\ PLXNA4    | NM_001105543:c.C332A;p.T111N             | 0.05 | D18 |
| chr7  | 1.46E+08 | 1.46E+08 | C | T | exonic   | synonymous SNV CNTNAP2      | NM_014141:c.C1053T;p.A351A               |      | D18 |
| chr8  | 1.09E+08 | 1.09E+08 | G | A | exonic   | nonsynonymous SN\ RSPO2     | NM_178565:c.C520T;p.R174W                | 0    | D18 |
| chr9  | 1.13E+08 | 1.13E+08 | T | A | exonic   | nonsynonymous SN\ OR2K2     | NM_205859:c.A328T;p.T110S                | 0.02 | D18 |
| chr9  | 1.3E+08  | 1.3E+08  | G | A | exonic   | synonymous SNV SLC27A4      | NM_005094:c.G900A;p.Q300Q                |      | D18 |
| chr10 | 25927205 | 25927205 | G | A | exonic   | nonsynonymous SN\ GPR158    | NM_020752:c.G2644A;p.A882T               | 0    | D18 |
| chr10 | 64637568 | 64637568 | C | T | exonic   | stopgain SNV JMJD1C         | NM_004241:c.G3210A;p.W1070X              | 0.1  | D18 |
| chr11 | 1.07E+08 | 1.07E+08 | G | A | exonic   | nonsynonymous SN\ CUL5      | NM_003478:c.G860A;p.R287K                | 0.85 | D18 |
| chr11 | 1.19E+08 | 1.19E+08 | G | A | exonic   | synonymous SNV ABCG4        | NM_001142505:c.G360A;p.E120E             |      | D18 |
| chr12 | 5973998  | 5973998  | C | T | exonic   | nonsynonymous SN\ VWF       | NM_000552:c.G6100A;p.V2034M              | 0.28 | D18 |
| chr13 | 31999630 | 31999630 | G | A | exonic   | nonsynonymous SN\ N4BP2L2   | NM_033111:c.C62T;p.A21V                  |      | D18 |
| chr14 | 44473067 | 44473067 | C | T | splicing | KLHL28                      |                                          |      | D18 |
| chr14 | 67319525 | 67319525 | A | T | exonic   | nonsynonymous SN\ ZFYVE26   | NM_015346:c.T4097A;p.F1366Y              | 0.01 | D18 |
| chr15 | 32870656 | 32870656 | C | T | exonic   | nonsynonymous SN\ ACTC1     | NM_005159:c.G941A;p.R314H                |      | D18 |
| chr16 | 15631821 | 15631821 | T | C | exonic   | nonsynonymous SN\ KIAA0430  | NM_001184998:c.A1393G;p.R465G            | 0    | D18 |
| chr16 | 17139890 | 17139890 | C | A | splicing | XYLT1                       |                                          |      | D18 |
| chr16 | 65771254 | 65771254 | G | A | exonic   | nonsynonymous SN\ KIAA0895L | NM_001040715:c.C679T;p.R227C             | 0.05 | D18 |
| chr17 | 7518990  | 7518990  | A | C | exonic   | nonsynonymous SN\ TP53      | NM_001126115:c.T188G;p.I63S              | 0    | D18 |
| chr18 | 61627987 | 61627987 | C | T | exonic   | nonsynonymous SN\ CDH7      | NM_004361:c.C278T;p.S93F                 | 0    | D18 |
| chr19 | 19683744 | 19683744 | C | G | exonic   | nonsynonymous SN\ ZNF14     | NM_021030:c.G1346C;p.C449S               | 0.06 | D18 |
| chr19 | 39777028 | 39777028 | C | G | exonic   | nonsynonymous SN\ SCGBL     | NM_001025591:c.G138C;p.E46D              |      | D18 |
| chr19 | 45010074 | 45010074 | G | A | exonic   | synonymous SNV DYRK1B       | NM_004714:c.C870T;p.Y290Y rs78838108     |      | D18 |
| chr19 | 48131398 | 48131398 | T | C | exonic   | nonsynonymous SN\ PSG7      | NM_002783:c.A428G;p.Y143C                |      | D18 |
| chr19 | 53571223 | 53571223 | G | C | exonic   | nonsynonymous SN\ SYNG4     | NM_012451:c.G541C;p.D181H                | 0.04 | D18 |
| chr20 | 1909480  | 1909480  | T | G | exonic   | nonsynonymous SN\ PDYN      | NM_001190892:c.A254C;p.K85T              | 0.06 | D18 |
| chr20 | 18244993 | 18244993 | G | A | exonic   | nonsynonymous SN\ ZNF133    | NM_001083330:c.G1495A;p.G499R            | 0.01 | D18 |
| chr20 | 36833782 | 36833782 | G | A | exonic   | nonsynonymous SN\ ACTR5     | NM_024855:c.G1733A;p.R578H               | 0.05 | D18 |
| chr20 | 52223046 | 52223046 | C | A | splicing | CYP24A1                     |                                          |      | D18 |
| chrX  | 18949208 | 18949208 | A | C | exonic   | nonsynonymous SN\ GPR64     | NM_001184835:c.T464G;p.L155R             | 0    | D18 |
| chrX  | 66859452 | 66859452 | C | T | exonic   | synonymous SNV AR           | NM_000044:c.C2508T;p.I836I               |      | D18 |
| chr1  | 47052485 | 47052485 | C | T | exonic   | nonsynonymous SN\ CYP4B1    | NM_000779:c.C790T;p.R264W rs45446505     | 0    | D2  |
| chr1  | 62873113 | 62873113 | T | G | exonic   | synonymous SNV DOCK7        | NM_033407:c.A954C;p.P318P                |      | D2  |

|       |          |          |   |   |          |                   |                  |                                |             |         |
|-------|----------|----------|---|---|----------|-------------------|------------------|--------------------------------|-------------|---------|
| chr1  | 1.17E+08 | 1.17E+08 | C | G | exonic   | synonymous SNV    | CD2              | NM_001767:c.C27G;p.A9A         |             | D2      |
| chr1  | 1.78E+08 | 1.78E+08 | C | T | exonic   | nonsynonymous SNV | NPHS2            | NM_014625:c.G880A;p.A294T      |             | 0 D2    |
| chr1  | 1.91E+08 | 1.91E+08 | A | G | exonic   | nonsynonymous SNV | CDC73            | NM_024529:c.A970G;p.T324A      |             | 0.04 D2 |
| chr1  | 2.08E+08 | 2.08E+08 | T | C | exonic   | nonsynonymous SNV | HSD11B1          | NM_005525:c.T95C;p.L32P        |             | 0 D2    |
| chr2  | 1.16E+08 | 1.16E+08 | G | A | exonic   | nonsynonymous SNV | DPP10            | NM_001004360:c.G1226A;p.R409Q  |             | 0.83 D2 |
| chr2  | 1.8E+08  | 1.8E+08  | C | T | exonic   | nonsynonymous SNV | ZNF385B          | NM_001113397:c.G65A;p.R22H     |             | 0.11 D2 |
| chr2  | 2.1E+08  | 2.1E+08  | C | A | exonic   | synonymous SNV    | MAP2             | NM_031847:c.C1029A;p.I343I     |             | D2      |
| chr2  | 2.11E+08 | 2.11E+08 | G | A | exonic   | stopgain SNV      | ACADL            | NM_001608:c.C736T;p.R246X      |             | 0.09 D2 |
| chr2  | 2.16E+08 | 2.16E+08 | T | A | exonic   | nonsynonymous SNV | ABCA12           | NM_015657:c.A1560T;p.K520N     |             | 0.1 D2  |
| chr3  | 9845938  | 9845938  | C | T | exonic   | synonymous SNV    | ARPC4-TTLL3,TTLL | NM_001025930:c.C1842T;p.N614N  |             | D2      |
| chr3  | 48692148 | 48692148 | T | G | exonic   | nonsynonymous SNV | NCKIPSD          | NM_016453:c.A1353C;p.E451D     |             | 0 D2    |
| chr3  | 74556736 | 74556736 | C | T | exonic   | nonsynonymous SNV | CNTN3            | NM_020872:c.G404A;p.R135H      |             | 0.42 D2 |
| chr3  | 1.75E+08 | 1.75E+08 | G | T | exonic   | synonymous SNV    | NLGN1            | NM_014932:c.G348T;p.V116V      |             | D2      |
| chr4  | 13230751 | 13230751 | A | T | exonic   | nonsynonymous SNV | BOD1L            | NM_148894:c.T282A;p.F94L       |             | 0.02 D2 |
| chr5  | 14555768 | 14555768 | T | G | splicing |                   | TRIO             |                                |             | D2      |
| chr5  | 26938340 | 26938340 | A | T | splicing |                   | CDH9             |                                |             | D2      |
| chr5  | 37099878 | 37099878 | C | T | exonic   | nonsynonymous SNV | NIPBL            | NM_015384:c.C8090T;p.T2697M    |             | D2      |
| chr5  | 1.12E+08 | 1.12E+08 | G | T | exonic   | stopgain SNV      | APC              | NM_001127511:c.G3862T;p.E1288X |             | 0.1 D2  |
| chr6  | 26496411 | 26496411 | A | G | exonic   | nonsynonymous SNV | BTN2A2           | NM_181531:c.A286G;p.I96V       |             | 0.27 D2 |
| chr7  | 69221100 | 69221100 | C | A | exonic   | nonsynonymous SNV | AUTS2            | NM_001127231:c.C569A;p.A190D   |             | 0 D2    |
| chr7  | 1.57E+08 | 1.57E+08 | C | G | exonic   | synonymous SNV    | UBE3C            | NM_014671:c.C3069G;p.L1023L    |             | D2      |
| chr8  | 11204598 | 11204598 | G | A | exonic   | nonsynonymous SNV | MTMR9            | NM_015458:c.G962A;p.C321Y      |             | 0 D2    |
| chr8  | 54844835 | 54844835 | T | A | exonic   | synonymous SNV    | ATP6V1H          | NM_213619:c.A1017T;p.S339S     |             | D2      |
| chr8  | 55703564 | 55703564 | A | G | exonic   | nonsynonymous SNV | RP1              | NM_006269:c.A4569G;p.I1523M    |             | 0.05 D2 |
| chr8  | 55703639 | 55703639 | T | G | exonic   | nonsynonymous SNV | RP1              | NM_006269:c.T4644G;p.S1548R    |             | 0 D2    |
| chr8  | 56598585 | 56598585 | T | C | exonic   | nonsynonymous SNV | XKR4             | NM_052898:c.T1198C;p.Y400H     |             | 0.01 D2 |
| chr8  | 59646022 | 59646022 | A | C | exonic   | nonsynonymous SNV | SDCBP            | NM_001007067:c.A74C;p.N25T     |             | 0.87 D2 |
| chr9  | 91168487 | 91168487 | A | G | exonic   | nonsynonymous SNV | SEMA4D           | NM_001142287:c.T2081C;p.V694A  |             | 0.05 D2 |
| chr10 | 24860840 | 24860840 | G | A | exonic   | nonsynonymous SNV | KIAA1217         | NM_001098501:c.G3053A;p.R1018H |             | 0 D2    |
| chr11 | 62172833 | 62172833 | C | T | exonic   | nonsynonymous SNV | INTS5            | NM_030628:c.G1295A;p.R432H     |             | 0.21 D2 |
| chr12 | 7530824  | 7530824  | C | T | exonic   | synonymous SNV    | CD163            | NM_004244:c.G2076A;p.S692S     |             | D2      |
| chr12 | 14929950 | 14929950 | C | A | exonic   | nonsynonymous SNV | MGP              | NM_000900:c.G43T;p.V15L        | rs112598629 | 0.6 D2  |
| chr12 | 27020521 | 27020521 | C | T | exonic   | stopgain SNV      | TM7SF3           | NM_016551:c.G1226A;p.W409X     |             | 0.52 D2 |
| chr12 | 38012982 | 38012982 | C | T | exonic   | synonymous SNV    | KIF21A           | NM_001173465:c.G2574A;p.T858T  |             | D2      |
| chr12 | 46802888 | 46802888 | A | G | exonic   | nonsynonymous SNV | PFKM             | NM_001166688:c.A64G;p.T22A     |             | 0 D2    |
| chr12 | 56263201 | 56263201 | C | A | exonic   | nonsynonymous SNV | KIF5A            | NM_004984:c.C3071A;p.P1024H    |             | 0 D2    |
| chr12 | 69425966 | 69425966 | G | A | exonic   | synonymous SNV    | PTPRR            | NM_130846:c.C171T;p.V57V       |             | D2      |
| chr12 | 1.08E+08 | 1.08E+08 | G | A | exonic   | nonsynonymous SNV | ACACB            | NM_001093:c.G2857A;p.E953K     |             | D2      |
| chr13 | 83353599 | 83353599 | G | A | exonic   | synonymous SNV    | SLITRK1          | NM_052910:c.C45T;p.A15A        |             | D2      |
| chr13 | 99751848 | 99751848 | T | G | exonic   | nonsynonymous SNV | PCCA             | NM_001127692:c.T1121G;p.V374G  |             | 0 D2    |
| chr14 | 64564232 | 64564232 | C | T | exonic   | synonymous SNV    | FNBT             | NM_002028:c.C585T;p.V195V      |             | D2      |
| chr16 | 30040812 | 30040812 | C | T | exonic   | nonsynonymous SNV | MAPK3            | NM_001040056:c.G187A;p.V63M    |             | 0.06 D2 |
| chr16 | 79276271 | 79276271 | G | A | exonic   | nonsynonymous SNV | CDYL2            | NM_152342:c.C281T;p.S94L       |             | 0.29 D2 |
| chr17 | 651052   | 651052   | C | A | exonic   | nonsynonymous SNV | NXN              | NM_022463:c.G1195T;p.D399Y     |             | 0.01 D2 |
| chr17 | 11777940 | 11777940 | C | T | exonic   | nonsynonymous SNV | DNAH9            | NM_004662:c.C1252T;p.R418C     |             | 0 D2    |
| chr19 | 16779668 | 16779668 | C | T | exonic   | synonymous SNV    | NWD1             | NM_001007525:c.C4008T;p.I1336I |             | D2      |
| chr20 | 10576750 | 10576750 | G | A | exonic   | synonymous SNV    | JAG1             | NM_000214:c.C1578T;p.I526I     | rs1801139   | D2      |
| chr20 | 31902531 | 31902531 | G | A | exonic   | nonsynonymous SNV | CHMP4B           | NM_176812:c.G481A;p.E161K      | rs118203966 | 0.01 D2 |
| chr20 | 54521841 | 54521841 | G | A | exonic   | nonsynonymous SNV | C20orf43         | NM_016407:c.G541A;p.V181M      |             | 0.21 D2 |
| chr20 | 62176097 | 62176097 | G | A | exonic   | synonymous SNV    | RGS19            | NM_001039467:c.C306T;p.S102S   |             | D2      |
| chrX  | 17655330 | 17655330 | C | G | exonic   | synonymous SNV    | NHS              | NM_198270:c.C3120G;p.S1040S    |             | D2      |
| chrX  | 21961112 | 21961112 | T | C | exonic   | nonsynonymous SNV | PHEX             | NM_000444:c.T68C;p.L23P        |             | 0 D2    |
| chrX  | 29211241 | 29211241 | C | T | exonic   | synonymous SNV    | IL1RAPL1         | NM_014271:c.C348T;p.Y116Y      |             | D2      |

|       |          |          |   |   |                 |                   |          |                                |            |      |     |
|-------|----------|----------|---|---|-----------------|-------------------|----------|--------------------------------|------------|------|-----|
| chrX  | 54800176 | 54800176 | A | G | exonic          | nonsynonymous SN\ | ITIH5L   | NM_198510:c.T3056C;p.V1019A    | 0.03       | D2   |     |
| chrX  | 67855068 | 67855068 | C | T | exonic          | synonymous SNV    | STARD8   | NM_001142504:c.C1347T;p.S449S  |            | D2   |     |
| chr1  | 20863705 | 20863705 | G | A | exonic          | nonsynonymous SN\ | KIF17    | NM_001122819:c.C3046T;p.R1016C | 0.01       | D22  |     |
| chr1  | 32052353 | 32052353 | G | A | exonic          | nonsynonymous SN\ | SPOCD1   | NM_144569:c.C1169T;p.S390F     | 0          | D22  |     |
| chr1  | 46300228 | 46300228 | C | A | exonic          | stopgain SNV      | PIK3R3   | NM_003629:c.G724T;p.E242X      | 0.02       | D22  |     |
| chr1  | 1.51E+08 | 1.51E+08 | A | C | exonic          | nonsynonymous SN\ | FLG2     | NM_001014342:c.T452G;p.V151G   |            | D22  |     |
| chr1  | 1.57E+08 | 1.57E+08 | C | T | exonic          | nonsynonymous SN\ | SPTA1    | NM_003126:c.G1703A;p.R568H     | 0.29       | D22  |     |
| chr1  | 1.97E+08 | 1.97E+08 | A | T | splicing        |                   | PTPRC    |                                |            | D22  |     |
| chr1  | 2.14E+08 | 2.14E+08 | A | T | exonic          | nonsynonymous SN\ | USH2A    | NM_206933:c.T15160A;p.L5054M   | 0          | D22  |     |
| chr1  | 2.46E+08 | 2.46E+08 | T | C | exonic          | nonsynonymous SN\ | OR2L8    | NM_001001963:c.T95C;p.F32S     | 0.25       | D22  |     |
| chr2  | 70786890 | 70786890 | G | A | exonic          | synonymous SNV    | ADD2     | NM_001185055:c.C207T;p.R69R    |            | D22  |     |
| chr2  | 2.28E+08 | 2.28E+08 | G | A | exonic          | synonymous SNV    | WDR69    | NM_178821:c.G309A;p.S103S      |            | D22  |     |
| chr3  | 14495637 | 14495637 | C | G | exonic          | synonymous SNV    | SLC6A6   | NM_001134367:c.C1491G;p.G497G  |            | D22  |     |
| chr3  | 39282578 | 39282578 | C | T | exonic          | nonsynonymous SN\ | CX3CR1   | NM_001171171:c.G427A;p.V143M   | 0.01       | D22  |     |
| chr3  | 46282521 | 46282521 | G | T | exonic          | nonsynonymous SN\ | CCR3     | NM_178329:c.G868T;p.A290S      | 0.15       | D22  |     |
| chr3  | 1.13E+08 | 1.13E+08 | T | G | exonic          | nonsynonymous SN\ | GCET2    | NM_001190260:c.A138C;p.Q46H    | rs74831119 | 0.1  | D22 |
| chr3  | 1.42E+08 | 1.42E+08 | C | T | exonic          | nonsynonymous SN\ | CLSTN2   | NM_022131:c.C1264T;p.R422C     | 0          | D22  |     |
| chr4  | 1.08E+08 | 1.08E+08 | T | G | exonic          | synonymous SNV    | DKK2     | NM_014421:c.A336C;p.R112R      |            | D22  |     |
| chr4  | 1.27E+08 | 1.27E+08 | A | T | exonic          | nonsynonymous SN\ | FAT4     | NM_024582:c.A14040T;p.Q4680H   | 0.31       | D22  |     |
| chr4  | 1.52E+08 | 1.52E+08 | G | C | exonic          | stopgain SNV      | SH3D19   | NM_001128924:c.C122G;p.S41X    | 0          | D22  |     |
| chr4  | 1.55E+08 | 1.55E+08 | C | T | exonic          | nonsynonymous SN\ | TLR2     | NM_003264:c.C2195T;p.A732V     | 0          | D22  |     |
| chr5  | 7762499  | 7762499  | C | T | exonic;splicing | nonsynonymous SN\ | ADCY2    | NM_020546:c.C1577T;p.T526M     |            | D22  |     |
| chr5  | 14421832 | 14421832 | G | A | exonic          | nonsynonymous SN\ | TRIO     | NM_007118:c.G2890A;p.A964T     | 0.12       | D22  |     |
| chr5  | 55443308 | 55443308 | G | A | exonic          | nonsynonymous SN\ | ANKRD55  | NM_024669:c.C1024T;p.R342W     | 0          | D22  |     |
| chr5  | 1.12E+08 | 1.12E+08 | T | G | exonic          | stopgain SNV      | APC      | NM_001127511:c.T1862G;p.L621X  | 0          | D22  |     |
| chr5  | 1.12E+08 | 1.12E+08 | A | G | exonic          | synonymous SNV    | APC      | NM_001127511:c.A7776G;p.G2592G |            | D22  |     |
| chr5  | 1.4E+08  | 1.4E+08  | C | T | exonic          | nonsynonymous SN\ | PCDHB1   | NM_013340:c.C788T;p.T263M      | 0.05       | D22  |     |
| chr5  | 1.41E+08 | 1.41E+08 | C | T | exonic          | nonsynonymous SN\ | PCDHB7   | NM_018940:c.C2150T;p.A717V     | rs80165947 | 0.08 | D22 |
| chr5  | 1.51E+08 | 1.51E+08 | G | A | exonic          | synonymous SNV    | SLC36A1  | NM_078483:c.G993A;p.L331L      |            | D22  |     |
| chr5  | 1.78E+08 | 1.78E+08 | G | A | exonic          | nonsynonymous SN\ | ADAMTS2  | NM_014244:c.C2071T;p.R691C     | 0.01       | D22  |     |
| chr7  | 6337104  | 6337104  | C | T | exonic          | synonymous SNV    | C7orf70  | NM_001037163:c.G207A;p.P69P    |            | D22  |     |
| chr7  | 37926886 | 37926886 | C | T | exonic          | synonymous SNV    | EPDR1    | NM_017549:c.C180T;p.T60T       |            | D22  |     |
| chr7  | 88803404 | 88803404 | G | A | exonic          | nonsynonymous SN\ | ZNF804B  | NM_181646:c.G3172A;p.E1058K    | 0.05       | D22  |     |
| chr8  | 2041517  | 2041517  | C | T | exonic          | nonsynonymous SN\ | MYOM2    | NM_003970:c.C2813T;p.A938V     | 0.13       | D22  |     |
| chr8  | 1.01E+08 | 1.01E+08 | C | T | exonic          | nonsynonymous SN\ | RGS22    | NM_015668:c.G3323A;p.R1108Q    | 0.46       | D22  |     |
| chr9  | 72123679 | 72123679 | A | C | exonic          | nonsynonymous SN\ | SMC5     | NM_015110:c.A2130C;p.K710N     |            | D22  |     |
| chr9  | 96575189 | 96575189 | G | T | exonic          | nonsynonymous SN\ | C9orf3   | NM_001193329:c.G882T;p.W294C   | 0          | D22  |     |
| chr9  | 1.02E+08 | 1.02E+08 | G | C | exonic          | nonsynonymous SN\ | INVS     | NM_014425:c.G807C;p.Q269H      | 0.01       | D22  |     |
| chr10 | 42933832 | 42933832 | G | A | exonic          | nonsynonymous SN\ | RET      | NM_020630:c.G2290A;p.A764T     | 0.01       | D22  |     |
| chr10 | 43011991 | 43011991 | C | T | exonic          | nonsynonymous SN\ | RASGEF1A | NM_145313:c.G1360A;p.A454T     | 0.05       | D22  |     |
| chr10 | 1.06E+08 | 1.06E+08 | G | A | exonic          | nonsynonymous SN\ | CCDC147  | NM_001008723:c.G1276A;p.D426N  | 0.36       | D22  |     |
| chr10 | 1.35E+08 | 1.35E+08 | C | T | exonic          | synonymous SNV    | KNDC1    | NM_152643:c.C1272T;p.D424D     |            | D22  |     |
| chr11 | 2126989  | 2126989  | G | A | exonic          | nonsynonymous SN\ | INS-IGF2 | NM_001042376:c.C350T;p.P117L   |            | D22  |     |
| chr11 | 4523807  | 4523807  | G | A | exonic          | nonsynonymous SN\ | OR52M1   | NM_001004137:c.G811A;p.V271M   | 0.02       | D22  |     |
| chr11 | 5418615  | 5418615  | G | A | exonic          | nonsynonymous SN\ | OR5111   | NM_001005288:c.C706T;p.R236W   | 0          | D22  |     |
| chr12 | 10653797 | 10653797 | T | C | exonic          | nonsynonymous SN\ | MAGOHB   | NM_018048:c.A164G;p.H55R       | 0.02       | D22  |     |
| chr12 | 25289551 | 25289551 | C | A | exonic          | nonsynonymous SN\ | KRAS     | NM_004985:c.G35T;p.G12V        | 0          | D22  |     |
| chr12 | 41150358 | 41150358 | C | T | exonic          | nonsynonymous SN\ | PRICKLE1 | NM_001144881:c.G203A;p.R68Q    | 0          | D22  |     |
| chr12 | 1.1E+08  | 1.1E+08  | G | T | exonic          | nonsynonymous SN\ | CUX2     | NM_015267:c.G4163T;p.R1388L    | 0.24       | D22  |     |
| chr13 | 27506473 | 27506473 | C | T | exonic          | nonsynonymous SN\ | FLT3     | NM_004119:c.G1669A;p.V557I     | rs35958982 | 0.56 | D22 |
| chr13 | 47426685 | 47426685 | T | C | exonic          | nonsynonymous SN\ | SUCLA2   | NM_003850:c.A811G;p.M271V      | 0.03       | D22  |     |
| chr13 | 49492358 | 49492358 | T | C | exonic          | nonsynonymous SN\ | KCNRG    | NM_173605:c.T586C;p.S196P      | 0          | D22  |     |
| chr13 | 77218689 | 77218689 | C | G | exonic          | stopgain SNV      | SLAIN1   | NM_144595:c.C101G;p.S34X       | 0.01       | D22  |     |

|       |          |          |   |   |                 |                             |                               |      |     |
|-------|----------|----------|---|---|-----------------|-----------------------------|-------------------------------|------|-----|
| chr14 | 93033321 | 93033321 | C | A | exonic          | nonsynonymous SN\ KIAA1409  | NM_020818:c.C303A:p.F101L     | 0.36 | D22 |
| chr14 | 93076915 | 93076915 | C | T | exonic          | synonymous SNV KIAA1409     | NM_020818:c.C978T:p.F326F     |      | D22 |
| chr14 | 1.03E+08 | 1.03E+08 | C | T | exonic          | stopgain SNV MARK3          | NM_001128921:c.C1273T:p.R425X | 0.01 | D22 |
| chr15 | 60091647 | 60091647 | C | T | exonic          | synonymous SNV VPS13C       | NM_017684:c.G705A:p.L235L     |      | D22 |
| chr16 | 31030734 | 31030734 | C | T | exonic          | nonsynonymous SN\ BCKDK     | NM_001122957:c.C979T:p.R327W  | 0.01 | D22 |
| chr16 | 56869924 | 56869924 | G | A | exonic          | nonsynonymous SN\ CCDC113   | NM_001142302:c.G767A:p.R256Q  | 0.06 | D22 |
| chr17 | 4402290  | 4402290  | G | A | exonic          | nonsynonymous SN\ MYBBP1A   | NM_001105538:c.C784T:p.R262C  | 0.03 | D22 |
| chr17 | 59120683 | 59120683 | A | C | exonic          | nonsynonymous SN\ MAP3K3    | NM_002401:c.A919C:p.T307P     | 0.18 | D22 |
| chr18 | 38949435 | 38949435 | G | A | exonic          | synonymous SNV RIT2         | NM_002930:c.C48T:p.G16G       |      | D22 |
| chr18 | 42815341 | 42815341 | C | T | exonic          | nonsynonymous SN\ TCEB3B    | NM_016427:c.G293A:p.R98H      | 0.24 | D22 |
| chr19 | 16949186 | 16949186 | C | T | exonic          | nonsynonymous SN\ CPAMD8    | NM_015692:c.G1891A:p.E631K    | 0    | D22 |
| chr19 | 46079821 | 46079821 | G | C | exonic          | nonsynonymous SN\ CYP2A7    | NM_000764:c.C135G:p.N45K      | 0    | D22 |
| chr19 | 46913885 | 46913885 | A | T | splicing        | CEACAM5                     |                               |      | D22 |
| chr19 | 56914341 | 56914341 | C | T | exonic          | nonsynonymous SN\ HAS1      | NM_001523:c.G632A:p.R211H     | 0.02 | D22 |
| chr19 | 58772339 | 58772339 | C | A | exonic          | nonsynonymous SN\ ZNF331    | NM_001079906:c.C713A:p.T238N  | 0.01 | D22 |
| chr19 | 59475592 | 59475592 | C | A | exonic          | nonsynonymous SN\ LILRB2    | NM_001080978:c.G221T:p.R74L   | 0.23 | D22 |
| chr19 | 62531837 | 62531837 | G | T | exonic          | stopgain SNV ZNF543         | NM_213598:c.G1195T:p.E399X    | 0    | D22 |
| chr20 | 43362995 | 43362995 | G | T | exonic          | nonsynonymous SN\ MATN4     | NM_030592:c.C712A:p.R238S     | 0.4  | D22 |
| chr20 | 47958174 | 47958174 | G | A | exonic          | synonymous SNV SPATA2       | NM_001135773:c.C261T:p.G87G   |      | D22 |
| chr22 | 30965018 | 30965018 | C | T | exonic          | synonymous SNV SLC5A4       | NM_014227:c.G537A:p.L179L     |      | D22 |
| chrX  | 14658502 | 14658502 | C | T | exonic          | nonsynonymous SN\ GLRA2     | NM_001118886:c.C1333T:p.R445W | 0    | D22 |
| chrX  | 70559759 | 70559759 | C | T | exonic          | nonsynonymous SN\ TAF1      | NM_004606:c.C4580T:p.A1527V   | 0.01 | D22 |
| chrX  | 1.11E+08 | 1.11E+08 | C | T | exonic          | synonymous SNV TRPC5        | NM_012471:c.G423A:p.P141P     |      | D22 |
| chr1  | 24074101 | 24074101 | G | A | exonic          | synonymous SNV CNR2         | NM_001841:c.C594T:p.I198I     |      | D4  |
| chr1  | 2.4E+08  | 2.4E+08  | C | A | exonic          | nonsynonymous SN\ EXO1      | NM_003686:c.C289A:p.Q97K      | 0.33 | D4  |
| chr2  | 1.2E+08  | 1.2E+08  | G | A | exonic          | synonymous SNV SCTR         | NM_002980:c.C732T:p.L244L     |      | D4  |
| chr2  | 1.33E+08 | 1.33E+08 | A | C | exonic          | nonsynonymous SN\ GPR39     | NM_001508:c.A533C:p.Y178S     | 0.64 | D4  |
| chr2  | 1.7E+08  | 1.7E+08  | G | A | exonic          | synonymous SNV LRP2         | NM_004525:c.C9312T:p.S3104S   |      | D4  |
| chr2  | 1.7E+08  | 1.7E+08  | C | T | exonic          | nonsynonymous SN\ LRP2      | NM_004525:c.G6742A:p.V2248I   | 0.46 | D4  |
| chr3  | 1.45E+08 | 1.45E+08 | C | T | exonic          | synonymous SNV SLC9A9       | NM_173653:c.G1158A:p.T386T    |      | D4  |
| chr4  | 1.85E+08 | 1.85E+08 | G | A | exonic          | synonymous SNV ENPP6        | NM_153343:c.C810T:p.R270R     |      | D4  |
| chr5  | 6705093  | 6705093  | C | T | exonic          | synonymous SNV SRD5A1       | NM_001047:c.C432T:p.D144D     |      | D4  |
| chr5  | 24571608 | 24571608 | G | T | exonic          | nonsynonymous SN\ CDH10     | NM_006727:c.C607A:p.L203I     | 0.1  | D4  |
| chr5  | 26951609 | 26951609 | G | A | exonic          | nonsynonymous SN\ CDH9      | NM_016279:c.C409T:p.R137W     | 0.01 | D4  |
| chr5  | 1.41E+08 | 1.41E+08 | G | T | exonic          | nonsynonymous SN\ PCDHB8    | NM_019120:c.G853T:p.A285S     | 0.11 | D4  |
| chr5  | 1.59E+08 | 1.59E+08 | T | G | exonic          | nonsynonymous SN\ IL12B     | NM_002187:c.A220C:p.T74P      | 0.03 | D4  |
| chr6  | 2893716  | 2893716  | C | T | exonic          | nonsynonymous SN\ SERPINB6  | NM_004568:c.G946A:p.V316M     | 0.03 | D4  |
| chr6  | 39710603 | 39710603 | G | A | exonic;splicing | nonsynonymous SN\ KIF6;KIF6 | NM_145027:c.C509T:p.P170L     | 0.01 | D4  |
| chr6  | 42304133 | 42304133 | A | T | exonic          | synonymous SNV TRERF1       | NM_033502:c.T3531A:p.A1177A   |      | D4  |
| chr6  | 97685464 | 97685464 | T | C | exonic          | synonymous SNV KLHL32       | NM_052904:c.T1524C:p.N508N    |      | D4  |
| chr6  | 1.48E+08 | 1.48E+08 | A | G | exonic          | synonymous SNV STXBP5       | NM_001127715:c.A699G:p.R233R  |      | D4  |
| chr6  | 1.66E+08 | 1.66E+08 | C | T | exonic          | nonsynonymous SN\ PDE10A    | NM_001130690:c.G2338A:p.V780M | 0.14 | D4  |
| chr7  | 1.03E+08 | 1.03E+08 | T | G | exonic          | nonsynonymous SN\ PSMC2     | NM_001204453:c.T177G:p.I59M   | 0.04 | D4  |
| chr7  | 1.37E+08 | 1.37E+08 | G | A | exonic          | nonsynonymous SN\ DGKI      | NM_004717:c.C2179T:p.R727W    | 0.01 | D4  |
| chr8  | 24413609 | 24413609 | G | T | exonic          | nonsynonymous SN\ ADAM7     | NM_003817:c.G1952T:p.C651F    | 0    | D4  |
| chr9  | 5703906  | 5703906  | C | T | exonic          | stopgain SNV KIAA1432       | NM_020829:c.C106T:p.Q36X      | 0.89 | D4  |
| chr9  | 1.29E+08 | 1.29E+08 | G | A | exonic          | synonymous SNV GARNL3       | NM_032293:c.G741A:p.T247T     |      | D4  |
| chr10 | 1.34E+08 | 1.34E+08 | C | T | exonic          | nonsynonymous SN\ LRRC27    | NM_001143757:c.C505T:p.R169W  |      | D4  |
| chr11 | 59377071 | 59377071 | C | T | exonic          | nonsynonymous SN\ TCN1      | NM_001062:c.G1255A:p.V419I    | 0.94 | D4  |
| chr14 | 38630622 | 38630622 | C | A | exonic          | nonsynonymous SN\ SEC23A    | NM_006364:c.G413T:p.C138F     | 0    | D4  |
| chr15 | 58555646 | 58555646 | G | T | exonic          | synonymous SNV NARG2        | NM_024611:c.C54A:p.P18P       |      | D4  |
| chr15 | 72260753 | 72260753 | G | A | exonic          | synonymous SNV STRA6        | NM_001142617:c.C1620T:p.N540N |      | D4  |
| chr16 | 20604021 | 20604021 | C | T | exonic          | nonsynonymous SN\ ACSM1     | NM_052956:c.G398A:p.R133Q     | 0.02 | D4  |



|       |          |          |   |   |                 |                            |                               |      |    |
|-------|----------|----------|---|---|-----------------|----------------------------|-------------------------------|------|----|
| chr17 | 7517846  | 7517846  | G | A | exonic          | nonsynonymous SN\ TP53     | NM_001126115:c.C421T:p.R141C  | 0    | D4 |
| chr17 | 42371115 | 42371115 | A | C | exonic          | nonsynonymous SN\ GOSR2    | NM_004287:c.A629C:p.Y210S     |      | D4 |
| chr17 | 51889247 | 51889247 | C | T | exonic          | nonsynonymous SN\ ANKFN1   | NM_153228:c.C1243T:p.R415C    | 0    | D4 |
| chr19 | 8814474  | 8814474  | G | A | exonic          | synonymous SNV MBD3L1      | NM_145208:c.G120A:p.T40T      |      | D4 |
| chr19 | 51951741 | 51951741 | C | T | exonic          | synonymous SNV FKRP        | NM_001039885:c.C1194T:p.V398V |      | D4 |
| chr19 | 61425890 | 61425890 | G | A | exonic          | synonymous SNV ZSCAN5A     | NM_024303:c.C621T:p.D207D     |      | D4 |
| chr1  | 7915909  | 7915909  | C | T | exonic          | synonymous SNV TNFRSF9     | NM_001561:c.G579A:p.A193A     |      | D8 |
| chr1  | 12259409 | 12259409 | C | A | exonic          | nonsynonymous SN\ VPS13D   | NM_015378:c.C3177A:p.N1059K   | 0.03 | D8 |
| chr1  | 46583063 | 46583063 | G | T | exonic          | nonsynonymous SN\ NSUN4    | NM_199044:c.G97T:p.A33S       | 0.81 | D8 |
| chr1  | 1.15E+08 | 1.15E+08 | C | T | exonic          | nonsynonymous SN\ AMPD1    | NM_001172626:c.G2035A:p.D679N | 0    | D8 |
| chr1  | 1.49E+08 | 1.49E+08 | C | T | exonic;splicing | synonymous SNV CDC42SE1    | NM_020239:c.G54A:p.P18P       |      | D8 |
| chr1  | 1.51E+08 | 1.51E+08 | G | C | exonic          | nonsynonymous SN\ FLG      | NM_002016:c.C7347G:p.S2449R   | 0.02 | D8 |
| chr1  | 1.57E+08 | 1.57E+08 | C | A | exonic          | nonsynonymous SN\ OR6K2    | NM_001005279:c.G838T:p.A280S  | 1    | D8 |
| chr2  | 54705531 | 54705531 | C | T | exonic          | synonymous SNV SPTBN1      | NM_178313:c.C1230T:p.L410L    |      | D8 |
| chr2  | 74332839 | 74332839 | C | A | exonic          | nonsynonymous SN\ SLC4A5   | NM_021196:c.G1453T:p.G485W    | 0.01 | D8 |
| chr2  | 1.63E+08 | 1.63E+08 | G | A | exonic          | nonsynonymous SN\ GCA      | NM_012198:c.G328A:p.G110R     | 0    | D8 |
| chr2  | 2.08E+08 | 2.08E+08 | C | T | exonic          | nonsynonymous SN\ CPO      | NM_173077:c.C923T:p.T308M     | 0    | D8 |
| chr2  | 2.12E+08 | 2.12E+08 | C | T | exonic          | synonymous SNV ERBB4       | NM_001042599:c.G1566A:p.S522S |      | D8 |
| chr3  | 13835828 | 13835828 | G | A | exonic          | nonsynonymous SN\ WNT7A    | NM_004625:c.C664T:p.R222W     | 0    | D8 |
| chr3  | 50391587 | 50391587 | C | T | exonic          | synonymous SNV CACNA2D2    | NM_001005505:c.G1200A:p.T400T |      | D8 |
| chr3  | 1.62E+08 | 1.62E+08 | G | A | exonic          | nonsynonymous SN\ PPM1L    | NM_139245:c.G661A:p.D221N     | 0.55 | D8 |
| chr3  | 1.84E+08 | 1.84E+08 | G | T | exonic          | stopgain SNV ATP11B        | NM_014616:c.G1684T:p.E562X    | 0.28 | D8 |
| chr5  | 38538574 | 38538574 | G | A | exonic          | nonsynonymous SN\ LIFR     | NM_001127671:c.C1522T:p.R508W | 0.01 | D8 |
| chr5  | 60491662 | 60491662 | G | A | exonic          | nonsynonymous SN\ C5orf43  | NM_001048249:c.C94T:p.P32S    | 0    | D8 |
| chr5  | 71662853 | 71662853 | G | T | exonic          | nonsynonymous SN\ PTC2D    | NM_024754:c.G363T:p.E121D     | 0.26 | D8 |
| chr5  | 1.79E+08 | 1.79E+08 | C | T | splicing        | HNRNP11                    |                               |      | D8 |
| chr6  | 27914439 | 27914439 | C | T | exonic          | synonymous SNV HIST1H2BN   | NM_003520:c.C21T:p.S7S        |      | D8 |
| chr6  | 71292382 | 71292382 | T | G | exonic          | nonsynonymous SN\ FAM135A  | NM_001162529:c.T2874G:p.N958K | 0.08 | D8 |
| chr6  | 1E+08    | 1E+08    | C | T | exonic          | nonsynonymous SN\ USP45    | NM_001080481:c.G839A:p.C280Y  | 0    | D8 |
| chr7  | 18033738 | 18033738 | C | T | exonic          | nonsynonymous SN\ PRPS1L1  | NM_175886:c.G193A:p.D65N      |      | D8 |
| chr7  | 73573548 | 73573548 | G | A | exonic          | nonsynonymous SN\ GTF2IRD1 | NM_001199207:c.G1087A:p.V363I | 0.1  | D8 |
| chr7  | 77811069 | 77811069 | G | A | exonic          | nonsynonymous SN\ MAGI2    | NM_012301:c.C1370T:p.P457L    | 0.74 | D8 |
| chr7  | 81173613 | 81173613 | G | T | exonic          | stopgain SNV HGF           | NM_000601:c.C1683A:p.C561X    | 0.03 | D8 |
| chr8  | 15525016 | 15525016 | C | A | exonic          | synonymous SNV TUSC3       | NM_006765:c.C195A:p.I65I      |      | D8 |
| chr8  | 53247125 | 53247125 | G | A | exonic          | synonymous SNV ST18        | NM_014682:c.C849T:p.S283S     |      | D8 |
| chr8  | 55217884 | 55217884 | G | A | exonic          | nonsynonymous SN\ MRPL15   | NM_014175:c.G538A:p.D180N     | 0.1  | D8 |
| chr8  | 80840526 | 80840526 | G | A | exonic          | nonsynonymous SN\ HEY1     | NM_001040708:c.C379T:p.R127W  | 0.01 | D8 |
| chr8  | 1.14E+08 | 1.14E+08 | C | A | exonic          | synonymous SNV CSMD3       | NM_052900:c.G3003T:p.V1001V   |      | D8 |
| chr9  | 8461077  | 8461077  | T | A | exonic          | nonsynonymous SN\ PTPRD    | NM_001171025:c.A2159T:p.Y720F | 0.18 | D8 |
| chr9  | 19342591 | 19342591 | C | A | exonic          | nonsynonymous SN\ DENND4C  | NM_017925:c.C3854A:p.A1285D   | 0.01 | D8 |
| chr10 | 30776875 | 30776875 | G | A | exonic          | synonymous SNV MAP3K8      | NM_005204:c.G495A:p.A165A     |      | D8 |
| chr10 | 55798899 | 55798899 | G | T | exonic          | nonsynonymous SN\ PCDH15   | NM_001142768:c.C395A:p.A132D  | 0.01 | D8 |
| chr11 | 4746852  | 4746852  | G | A | exonic          | nonsynonymous SN\ OR51F1   | NM_001004752:c.C872T:p.P291L  | 0    | D8 |
| chr11 | 14796459 | 14796459 | T | C | exonic          | synonymous SNV PDE3B       | NM_000922:c.T1677C:p.P559P    |      | D8 |
| chr11 | 60814892 | 60814892 | C | T | exonic          | nonsynonymous SN\ VVCE     | NM_152718:c.G379A:p.V127M     | 0.13 | D8 |
| chr12 | 1161367  | 1161367  | C | T | exonic          | nonsynonymous SN\ ERC1     | NM_178039:c.C1807T:p.R603C    | 0.01 | D8 |
| chr12 | 25289551 | 25289551 | C | A | exonic          | nonsynonymous SN\ KRAS     | NM_004985:c.G35T:p.G12V       | 0    | D8 |
| chr12 | 86963676 | 86963676 | G | T | exonic          | nonsynonymous SN\ C12orf29 | NM_001009894:c.G608T:p.G203V  | 0.03 | D8 |
| chr12 | 1.28E+08 | 1.28E+08 | C | A | exonic          | synonymous SNV TMEM132D    | NM_133448:c.G1791T:p.L597L    |      | D8 |
| chr13 | 66698003 | 66698003 | C | G | exonic          | nonsynonymous SN\ PCDH9    | NM_020403:c.G2571C:p.M857I    | 0.36 | D8 |
| chr14 | 62517507 | 62517507 | C | A | exonic          | nonsynonymous SN\ KCNH5    | NM_139318:c.G778T:p.V260F     | 0.01 | D8 |
| chr15 | 26031952 | 26031952 | C | T | exonic          | nonsynonymous SN\ HERC2    | NM_004667:c.G14092A:p.A4698T  | 0.05 | D8 |
| chr16 | 2753356  | 2753356  | G | A | exonic          | synonymous SNV SRRM2       | NM_016333:c.G2826A:p.T942T    |      | D8 |

|       |          |          |   |   |                 |                   |          |                               |            |         |
|-------|----------|----------|---|---|-----------------|-------------------|----------|-------------------------------|------------|---------|
| chr17 | 30488707 | 30488707 | C | T | exonic          | stopgain SNV      | NLE1     | NM_018096:c.G603A:p.W201X     | 0.01       | D8      |
| chr17 | 30545107 | 30545107 | G | A | exonic          | synonymous SNV    | AMAC1    | NM_152462:c.C333T:p.N111N     |            | D8      |
| chr18 | 32446039 | 32446039 | C | A | exonic          | nonsynonymous SNV | FHOD3    | NM_025135:c.C940A:p.Q314K     | 0.12       | D8      |
| chr18 | 75760561 | 75760561 | G | A | exonic          | synonymous SNV    | KCNG2    | NM_012283:c.G1158A:p.A386A    |            | D8      |
| chr18 | 75995149 | 75995149 | C | T | exonic          | stopgain SNV      | ADNP2    | NM_014913:c.C862T:p.Q288X     | 0.64       | D8      |
| chr19 | 48458035 | 48458035 | C | T | exonic          | nonsynonymous SNV | PSG9     | NM_002784:c.G526A:p.A176T     | 0.54       | D8      |
| chr19 | 53235736 | 53235736 | G | A | exonic          | nonsynonymous SNV | CABP5    | NM_019855:c.C176T:p.T59M      |            | 0 D8    |
| chr19 | 59236998 | 59236998 | C | T | exonic          | synonymous SNV    | VSTM1    | NM_198481:c.G537A:p.P179P     | rs73058793 | D8      |
| chr19 | 59798015 | 59798015 | G | A | exonic          | stopgain SNV      | LILRA1   | NM_006863:c.G144A:p.W48X      |            | 0.02 D8 |
| chr20 | 17188937 | 17188937 | C | T | exonic          | nonsynonymous SNV | PCSK2    | NM_002594:c.C230T:p.A77V      |            | 0.58 D8 |
| chr22 | 28455184 | 28455184 | C | T | exonic          | synonymous SNV    | CABP7    | NM_182527:c.C507T:p.P169P     |            | D8      |
| chrX  | 47313230 | 47313230 | G | A | exonic          | nonsynonymous SNV | ARAF     | NM_001654:c.G1246A:p.G416S    |            | 0 D8    |
| chrX  | 1.28E+08 | 1.28E+08 | C | A | exonic          | stopgain SNV      | SMARCA1  | NM_139035:c.G3073T:p.E1025X   |            | 0.79 D8 |
| chr1  | 2.12E+08 | 2.12E+08 | A | C | exonic          | nonsynonymous SNV | PROX1    | NM_002763:c.A1625C:p.H542P    |            | 0.17 D5 |
| chr2  | 80383903 | 80383903 | G | A | exonic          | nonsynonymous SNV | LRRTM1   | NM_178839:c.C553T:p.R185C     |            | 0 D5    |
| chr2  | 1.79E+08 | 1.79E+08 | A | C | exonic          | nonsynonymous SNV | FKBP7    | NM_001135212:c.T590G:p.F197C  |            | 0 D5    |
| chr2  | 2.11E+08 | 2.11E+08 | C | T | exonic          | nonsynonymous SNV | ACADL    | NM_001608:c.G182A:p.R61Q      |            | 0.04 D5 |
| chr2  | 2.18E+08 | 2.18E+08 | G | A | exonic          | nonsynonymous SNV | TNS1     | NM_022648:c.C203T:p.T68M      |            | 0.01 D5 |
| chr3  | 51655480 | 51655480 | A | C | exonic          | nonsynonymous SNV | RAD54L2  | NM_015106:c.A2969C:p.Y990S    |            | 0.09 D5 |
| chr3  | 61950423 | 61950423 | A | T | exonic          | nonsynonymous SNV | PTPRG    | NM_002841:c.A275T:p.Y92F      |            | 0.04 D5 |
| chr4  | 3287822  | 3287822  | G | A | exonic          | nonsynonymous SNV | RGS12    | NM_002926:c.G127A:p.V43M      |            | 0.03 D5 |
| chr5  | 1.12E+08 | 1.12E+08 | C | T | exonic          | stopgain SNV      | APC      | NM_001127511:c.C1441T:p.R481X |            | 0 D5    |
| chr5  | 1.4E+08  | 1.4E+08  | C | T | exonic          | synonymous SNV    | PCDHA1   | NM_018898:c.C2694T:p.P898P    |            | D5      |
| chr5  | 1.4E+08  | 1.4E+08  | G | A | exonic          | nonsynonymous SNV | PCDHB5   | NM_015669:c.G605A:p.R202Q     |            | 0.01 D5 |
| chr5  | 1.56E+08 | 1.56E+08 | C | T | exonic          | synonymous SNV    | TIMD4    | NM_001146726:c.G954A:p.S318S  |            | D5      |
| chr6  | 1.1E+08  | 1.1E+08  | C | T | exonic          | nonsynonymous SNV | PPIL6    | NM_001111298:c.G397A:p.A133T  |            | 0.67 D5 |
| chr6  | 1.6E+08  | 1.6E+08  | C | T | exonic          | stopgain SNV      | IGF2R    | NM_000876:c.C2473T:p.R825X    |            | 0.02 D5 |
| chr7  | 1.05E+08 | 1.05E+08 | G | T | exonic          | nonsynonymous SNV | PUS7     | NM_019042:c.C1891A:p.P631T    |            | 0.04 D5 |
| chr8  | 82554301 | 82554301 | G | C | exonic          | nonsynonymous SNV | FABP4    | NM_001442:c.C251G:p.T84S      |            | 0.01 D5 |
| chr9  | 72403263 | 72403263 | G | A | exonic          | synonymous SNV    | TRPM3    | NM_206944:c.C2415T:p.D805D    |            | D5      |
| chr10 | 25200936 | 25200936 | T | C | exonic          | synonymous SNV    | PRTFDC1  | NM_020200:c.A402G:p.G134G     |            | D5      |
| chr10 | 28189639 | 28189639 | C | T | exonic          | nonsynonymous SNV | ARMC4    | NM_018076:c.G2942A:p.R981Q    |            | 0.02 D5 |
| chr10 | 33177569 | 33177569 | G | A | exonic          | nonsynonymous SNV | C10orf68 | NM_024688:c.G1541A:p.R514H    |            | 0 D5    |
| chr10 | 51250940 | 51250940 | G | A | exonic          | nonsynonymous SNV | NCOA4    | NM_001145262:c.G337A:p.D113N  |            | 0.02 D5 |
| chr11 | 1.24E+08 | 1.24E+08 | G | A | exonic          | nonsynonymous SNV | OR8B8    | NM_012378:c.C656T:p.A219V     |            | 0.68 D5 |
| chr12 | 6794192  | 6794192  | C | T | exonic          | nonsynonymous SNV | CD4      | NM_000616:c.C380T:p.A127V     |            | 0.17 D5 |
| chr12 | 6794193  | 6794193  | C | G | exonic          | synonymous SNV    | CD4      | NM_000616:c.C381G:p.A127A     |            | D5      |
| chr12 | 7875492  | 7875492  | C | T | exonic          | nonsynonymous SNV | SLC2A14  | NM_153449:c.G316A:p.G106R     |            | 0 D5    |
| chr12 | 32338254 | 32338254 | G | A | exonic          | synonymous SNV    | BICD1    | NM_001003398:c.G486A:p.K162K  |            | D5      |
| chr14 | 49725005 | 49725005 | C | T | exonic          | nonsynonymous SNV | SOS2     | NM_006939:c.G674A:p.R225Q     |            | 0 D5    |
| chr14 | 64101302 | 64101302 | C | T | exonic          | nonsynonymous SNV | C14orf50 | NM_172365:c.C263T:p.S88L      |            | 0.09 D5 |
| chr14 | 64101303 | 64101303 | A | C | exonic          | synonymous SNV    | C14orf50 | NM_172365:c.A264C:p.S88S      |            | D5      |
| chr16 | 27353256 | 27353256 | C | T | exonic          | nonsynonymous SNV | IL21R    | NM_021798:c.C137T:p.T46M      |            | 0.1 D5  |
| chr16 | 56589170 | 56589170 | G | A | exonic          | synonymous SNV    | ZNF319   | NM_020807:c.C501T:p.Y167Y     |            | D5      |
| chr16 | 60412402 | 60412402 | C | T | exonic          | nonsynonymous SNV | CDH8     | NM_001796:c.G952A:p.G318R     |            | 0 D5    |
| chr17 | 1506699  | 1506699  | G | A | exonic          | nonsynonymous SNV | PRPF8    | NM_006445:c.C5612T:p.P1871L   |            | 0 D5    |
| chr17 | 34752960 | 34752960 | G | A | exonic;splicing | nonsynonymous SNV | FBXL20   | NM_001184906:c.C103T:p.R35W   |            | 0 D5    |
| chr18 | 51221746 | 51221746 | A | C | exonic;splicing | nonsynonymous SNV | TCF4     | NM_001083962:c.T306G:p.S102R  |            | 0 D5    |
| chr20 | 43960116 | 43960116 | C | T | exonic          | synonymous SNV    | CTSA     | NM_001167594:c.C1323T:p.F441F |            | D5      |
| chr20 | 46758228 | 46758228 | G | A | exonic          | stopgain SNV      | PREX1    | NM_020820:c.C760T:p.Q254X     |            | 0.01 D5 |
| chr20 | 55517112 | 55517112 | T | A | exonic          | nonsynonymous SNV | CTCF     | NM_080618:c.A1630T:p.T544S    |            | 0.39 D5 |
| chr21 | 31414753 | 31414753 | C | T | exonic          | nonsynonymous SNV | TIAM1    | NM_003253:c.G4580A:p.R1527Q   |            | 1 D5    |
| chr21 | 33782832 | 33782832 | G | A | exonic          | synonymous SNV    | DNAJC28  | NM_001040192:c.C739T:p.L247L  |            | D5      |

|       |          |          |   |   |                 |                   |           |                                |             |     |    |
|-------|----------|----------|---|---|-----------------|-------------------|-----------|--------------------------------|-------------|-----|----|
| chrX  | 18123396 | 18123396 | G | A | exonic          | nonsynonymous SN\ | BEND2     | NM_153346:c.C1121T;p.S374L     | 0.03        | D5  |    |
| chrX  | 49742227 | 49742227 | C | T | exonic          | synonymous SNV    | CLCN5     | NM_000084:c.C2094T;p.I698I     |             | D5  |    |
| chrX  | 1.03E+08 | 1.03E+08 | C | T | exonic;splicing | nonsynonymous SN\ | PLP1;PLP1 | NM_000533:c.C347T;p.T116M      | 0.11        | D5  |    |
| chrX  | 1.14E+08 | 1.14E+08 | C | T | exonic          | nonsynonymous SN\ | HTR2C     | NM_000868:c.C683T;p.T228M      | 0.12        | D5  |    |
| chrX  | 1.29E+08 | 1.29E+08 | T | G | splicing        |                   | UTP14A    |                                |             | D5  |    |
| chr1  | 54443417 | 54443417 | G | T | exonic          | nonsynonymous SN\ | MRPL37    | NM_016491:c.C485T;p.R162L      | 0.6         | D7  |    |
| chr1  | 2.05E+08 | 2.05E+08 | G | A | exonic          | synonymous SNV    | PIGR      | NM_002644:c.C981T;p.A327A      |             | D7  |    |
| chr2  | 27333601 | 27333601 | C | T | exonic          | synonymous SNV    | SLC30A3   | NM_003459:c.G702A;p.A234A      | rs114763573 | D7  |    |
| chr2  | 49044299 | 49044299 | T | G | exonic          | nonsynonymous SN\ | FSHR      | NM_181446:c.A1087C;p.T363P     | 0.06        | D7  |    |
| chr2  | 1.7E+08  | 1.7E+08  | G | A | exonic          | synonymous SNV    | LRP2      | NM_004525:c.C2247T;p.D749D     |             | D7  |    |
| chr2  | 1.92E+08 | 1.92E+08 | T | G | exonic          | nonsynonymous SN\ | GLS       | NM_014905:c.T1796G;p.V599G     | 0.2         | D7  |    |
| chr2  | 2.02E+08 | 2.02E+08 | C | T | exonic          | nonsynonymous SN\ | CASP8     | NM_033356:c.C575T;p.T192I      | 0.17        | D7  |    |
| chr2  | 2.2E+08  | 2.2E+08  | C | T | exonic          | nonsynonymous SN\ | TMEM198   | NM_001005209:c.C281T;p.A94V    | 0.38        | D7  |    |
| chr3  | 13497860 | 13497860 | C | T | exonic          | synonymous SNV    | HDAC11    | NM_001136041:c.C33T;p.A11A     |             | D7  |    |
| chr3  | 1.02E+08 | 1.02E+08 | G | A | exonic          | nonsynonymous SN\ | IMP2      | NM_016247:c.C2831T;p.T944M     | 0           | D7  |    |
| chr4  | 9591458  | 9591458  | G | A | exonic;splicing | synonymous SNV    | SLC2A9    | NM_020041:c.C537T;p.G179G      |             | D7  |    |
| chr4  | 73116537 | 73116537 | G | A | exonic          | nonsynonymous SN\ | NPF22     | NM_004885:c.G55A;p.V19I        | 0           | D7  |    |
| chr4  | 1.27E+08 | 1.27E+08 | G | T | exonic          | nonsynonymous SN\ | FAT4      | NM_024582:c.G7097T;p.S2366I    | 0.15        | D7  |    |
| chr4  | 1.4E+08  | 1.4E+08  | A | C | exonic          | nonsynonymous SN\ | CCRN4L    | NM_012118:c.A604C;p.T202P      | rs75741507  | 0.1 | D7 |
| chr4  | 1.55E+08 | 1.55E+08 | G | T | exonic          | synonymous SNV    | DCHS2     | NM_001142552:c.C3543A;p.V1181V |             | D7  |    |
| chr4  | 1.77E+08 | 1.77E+08 | C | T | exonic          | nonsynonymous SN\ | GPM6A     | NM_201591:c.G50A;p.C17Y        | 0           | D7  |    |
| chr5  | 14663257 | 14663257 | T | C | exonic          | nonsynonymous SN\ | FAM105A   | NM_019018:c.T905C;p.M302T      | 0.01        | D7  |    |
| chr5  | 1.12E+08 | 1.12E+08 | C | T | exonic          | stopgain SNV      | APC       | NM_001127511:c.C637T;p.Q213X   | 0.01        | D7  |    |
| chr5  | 1.4E+08  | 1.4E+08  | C | T | exonic          | nonsynonymous SN\ | PCDHA2    | NM_018905:c.C818T;p.P273L      | 0.68        | D7  |    |
| chr5  | 1.41E+08 | 1.41E+08 | C | T | exonic          | nonsynonymous SN\ | ARAP3     | NM_022481:c.G2840A;p.R947H     | 0.2         | D7  |    |
| chr6  | 27942812 | 27942812 | C | G | exonic          | nonsynonymous SN\ | HIST1H1B  | NM_005322:c.G475C;p.A159P      | 0.08        | D7  |    |
| chr6  | 1.31E+08 | 1.31E+08 | G | A | exonic          | synonymous SNV    | TMEM200A  | NM_052913:c.G1317A;p.P439P     |             | D7  |    |
| chr7  | 86306794 | 86306794 | C | T | exonic          | synonymous SNV    | GRM3      | NM_000840:c.C2028T;p.G676G     | rs112184476 | D7  |    |
| chr7  | 1.15E+08 | 1.15E+08 | G | T | exonic          | nonsynonymous SN\ | TFEC      | NM_001018058:c.C146A;p.A49D    | 0.07        | D7  |    |
| chr8  | 57085046 | 57085046 | C | T | exonic          | synonymous SNV    | LYN       | NM_001111097:c.C1299T;p.T433T  |             | D7  |    |
| chr9  | 32457877 | 32457877 | C | A | exonic          | nonsynonymous SN\ | DDX58     | NM_014314:c.G2068T;p.D690Y     | 0.02        | D7  |    |
| chr9  | 36390092 | 36390092 | A | C | splicing        |                   | RNF38     |                                |             | D7  |    |
| chr9  | 79124339 | 79124339 | G | A | exonic          | stopgain SNV      | VPS13A    | NM_001018037:c.G5228A;p.W1743X | 0           | D7  |    |
| chr9  | 85805804 | 85805804 | A | G | exonic          | nonsynonymous SN\ | RM1       | NM_024945:c.A83G;p.E28G        | 0.06        | D7  |    |
| chr9  | 1.07E+08 | 1.07E+08 | C | T | exonic          | nonsynonymous SN\ | ABCA1     | NM_005502:c.G667A;p.A223T      | 0.41        | D7  |    |
| chr9  | 1.14E+08 | 1.14E+08 | C | T | exonic          | nonsynonymous SN\ | SUSD1     | NM_022486:c.G1229A;p.C410Y     | 0           | D7  |    |
| chr10 | 73191638 | 73191638 | G | A | exonic          | synonymous SNV    | C10orf54  | NM_022153:c.C234T;p.G78G       |             | D7  |    |
| chr10 | 1.16E+08 | 1.16E+08 | G | T | exonic          | nonsynonymous SN\ | C10orf81  | NM_001193435:c.G269T;p.R90I    | 0.01        | D7  |    |
| chr10 | 1.34E+08 | 1.34E+08 | G | A | exonic          | nonsynonymous SN\ | LRRC27    | NM_001143757:c.G1100A;p.R367K  |             | D7  |    |
| chr11 | 547633   | 547633   | G | A | exonic          | nonsynonymous SN\ | C11orf35  | NM_173573:c.C563T;p.T188M      | 0           | D7  |    |
| chr11 | 57642720 | 57642720 | A | G | exonic          | nonsynonymous SN\ | OR9I1     | NM_001005211:c.T773C;p.M258T   | 0.07        | D7  |    |
| chr12 | 6571467  | 6571467  | A | G | exonic          | nonsynonymous SN\ | CHD4      | NM_001273:c.T2966C;p.I989T     | 0           | D7  |    |
| chr12 | 10230306 | 10230306 | C | T | exonic          | nonsynonymous SN\ | C12orf59  | NM_153022:c.C98T;p.A33V        | 0.48        | D7  |    |
| chr12 | 25289551 | 25289551 | C | T | exonic          | nonsynonymous SN\ | KRAS      | NM_004985:c.G35A;p.G12D        | 0           | D7  |    |
| chr12 | 75276717 | 75276717 | G | A | exonic          | synonymous SNV    | OSBPL8    | NM_001003712:c.C2208T;p.S736S  |             | D7  |    |
| chr13 | 39073261 | 39073261 | G | A | exonic          | synonymous SNV    | LHFP      | NM_005780:c.C93T;p.Y31Y        |             | D7  |    |
| chr13 | 1.1E+08  | 1.1E+08  | G | A | exonic          | synonymous SNV    | COL4A1    | NM_001845:c.C4851T;p.H1617H    |             | D7  |    |
| chr14 | 63755825 | 63755825 | A | T | exonic          | nonsynonymous SN\ | SYNE2     | NM_182910:c.A328T;p.M110L      | 0.44        | D7  |    |
| chr14 | 72495110 | 72495110 | C | T | exonic          | synonymous SNV    | DCAF4     | NM_181341:c.C1152T;p.H384H     |             | D7  |    |
| chr14 | 76312020 | 76312020 | G | A | exonic          | nonsynonymous SN\ | VASH1     | NM_014909:c.G563A;p.R188H      | 0           | D7  |    |
| chr15 | 39411430 | 39411430 | C | T | exonic          | nonsynonymous SN\ | OIP5      | NM_007280:c.G364A;p.G122S      | 0.07        | D7  |    |
| chr15 | 88970169 | 88970169 | G | A | exonic          | nonsynonymous SN\ | CRTC3     | NM_001042574:c.G907A;p.G303R   |             | D7  |    |
| chr16 | 85922433 | 85922433 | C | T | exonic          | nonsynonymous SN\ | FBXO31    | NM_024735:c.G1582A;p.D528N     | 0.04        | D7  |    |

|       |          |          |   |   |                 |                   |           |                                |            |      |    |
|-------|----------|----------|---|---|-----------------|-------------------|-----------|--------------------------------|------------|------|----|
| chr17 | 25871159 | 25871159 | T | A | exonic          | nonsynonymous SN\ | GOSR1     | NM_001007024:c.T427A:p.L143M   | 0.02       | D7   |    |
| chr17 | 38258439 | 38258439 | C | T | exonic          | nonsynonymous SN\ | AOC3      | NM_003734:c.C1553T:p.T518M     | 0.01       | D7   |    |
| chr18 | 46858663 | 46858663 | G | A | exonic          | nonsynonymous SN\ | SMAD4     | NM_005359:c.G1487A:p.R496H     | 0          | D7   |    |
| chr19 | 62340140 | 62340140 | T | A | exonic          | nonsynonymous SN\ | ZIM3      | NM_052882:c.A154T:p.T52S       | 0.03       | D7   |    |
| chr20 | 808458   | 808458   | A | C | exonic          | nonsynonymous SN\ | ANGPT4    | NM_015985:c.T985G:p.W329G      | 0          | D7   |    |
| chr20 | 31351410 | 31351410 | T | C | exonic          | nonsynonymous SN\ | C20orf114 | NM_033197:c.T706C:p.Y236H      | 0.35       | D7   |    |
| chr20 | 34226967 | 34226967 | G | A | exonic          | synonymous SNV    | EPB41L1   | NM_177996:c.G72A:p.S24S        |            | D7   |    |
| chr20 | 57775840 | 57775840 | T | A | exonic          | nonsynonymous SN\ | PHACTR3   | NM_001199505:c.T737A:p.V246D   | 0.28       | D7   |    |
| chr22 | 40113416 | 40113416 | C | T | exonic          | synonymous SNV    | TEF       | NM_001145398:c.C183T:p.G61G    |            | D7   |    |
| chrX  | 37412585 | 37412585 | C | T | exonic          | synonymous SNV    | LANCL3    | NM_198511:c.C1149T:p.T383T     |            | D7   |    |
| chrX  | 63481743 | 63481743 | C | A | exonic          | stopgain SNV      | MTMR8     | NM_017677:c.G772T:p.E258X      | 0          | D7   |    |
| chrX  | 73880485 | 73880485 | T | G | exonic          | nonsynonymous SN\ | KIAA2022  | NM_001008537:c.A632C:p.K211T   | 0.02       | D7   |    |
| chrX  | 80258492 | 80258492 | A | C | exonic          | nonsynonymous SN\ | HMG5      | NM_030763:c.T134G:p.M45R       | 0.08       | D7   |    |
| chrX  | 86777427 | 86777427 | G | A | exonic          | nonsynonymous SN\ | KLHL4     | NM_019117:c.G1921A:p.E641K     | 0          | D7   |    |
| chrX  | 1.23E+08 | 1.23E+08 | C | A | exonic          | nonsynonymous SN\ | ODZ1      | NM_014253:c.G6636T:p.M2212I    | 0.63       | D7   |    |
| chrX  | 1.43E+08 | 1.43E+08 | A | G | exonic          | nonsynonymous SN\ | SLITRK4   | NM_001184749:c.T521C:p.I174T   | 0.01       | D7   |    |
| chr1  | 1.44E+08 | 1.44E+08 | T | C | exonic          | nonsynonymous SN\ | PDE4DIP   | NM_001002811:c.A622G:p.T208A   | rs41315684 | 0.75 | D1 |
| chr1  | 1.65E+08 | 1.65E+08 | C | A | exonic          | nonsynonymous SN\ | DUSP27    | NM_001080426:c.C3371A:p.T1124  | rs2281959  | 0    | D1 |
| chr1  | 1.84E+08 | 1.84E+08 | G | A | exonic          | nonsynonymous SN\ | HMCN1     | NM_031935:c.G16420A:p.D5474N   |            | 0    | D1 |
| chr2  | 1.07E+08 | 1.07E+08 | T | C | exonic          | nonsynonymous SN\ | ST6GAL2   | NM_001142351:c.A1021G:p.I341V  | rs12615112 | 0.36 | D1 |
| chr2  | 1.12E+08 | 1.12E+08 | A | G | exonic          | nonsynonymous SN\ | MERTK     | NM_006343:c.A1552G:p.I518V     | rs2230515  | 0.44 | D1 |
| chr2  | 1.52E+08 | 1.52E+08 | A | G | exonic          | nonsynonymous SN\ | TNFAIP6   | NM_007115:c.A431G:p.Q144R      | rs1046668  | 0.85 | D1 |
| chr2  | 1.7E+08  | 1.7E+08  | T | C | exonic          | nonsynonymous SN\ | LRP2      | NM_004525:c.A11152G:p.T3718A   |            | 0.2  | D1 |
| chr3  | 57266055 | 57266055 | C | G | exonic          | nonsynonymous SN\ | APPL1     | NM_012096:c.C1183G:p.L395V     |            | 0.03 | D1 |
| chr3  | 1.24E+08 | 1.24E+08 | G | A | exonic          | synonymous SNV    | PDIA5     | NM_006810:c.G978A:p.A326A      | rs8739     |      | D1 |
| chr5  | 1.12E+08 | 1.12E+08 | C | T | exonic;splicing | stopgain SNV      | APC       | NM_000038:c.C646T:p.R216X      | rs62619935 | 0.19 | D1 |
| chr5  | 1.63E+08 | 1.63E+08 | C | T | exonic          | nonsynonymous SN\ | HMMR      | NM_001142557:c.C1193T:p.A398V  | rs299295   | 1    | D1 |
| chr5  | 1.69E+08 | 1.69E+08 | C | T | exonic          | nonsynonymous SN\ | DOCK2     | NM_004946:c.C2245T:p.R749W     |            | 0    | D1 |
| chr6  | 34208806 | 34208806 | C | T | exonic          | nonsynonymous SN\ | GRM4      | NM_000841:c.G446A:p.R149H      |            | 0.1  | D1 |
| chr6  | 70923330 | 70923330 | C | T | exonic          | synonymous SNV    | COL19A1   | NM_001858:c.C2286T:p.G762G     | rs2229799  |      | D1 |
| chr6  | 1.3E+08  | 1.3E+08  | C | A | exonic          | nonsynonymous SN\ | LAMA2     | NM_000426:c.C682A:p.P228T      |            | 0.79 | D1 |
| chr7  | 43777289 | 43777289 | G | A | exonic          | nonsynonymous SN\ | BLVRA     | NM_000712:c.G7A:p.A3T          | rs699512   | 1    | D1 |
| chr7  | 56056319 | 56056319 | T | A | exonic          | nonsynonymous SN\ | PSPH      | NM_004577:c.A81T:p.R27S        | rs74445297 | 0.76 | D1 |
| chr9  | 34239887 | 34239887 | G | A | exonic          | synonymous SNV    | UBAP1     | NM_001171201:c.G1386A:p.T462T  |            |      | D1 |
| chr11 | 18710749 | 18710749 | G | A | exonic          | nonsynonymous SN\ | PTPN5     | NM_001039970:c.C1199T:p.T400M  |            | 0.23 | D1 |
| chr12 | 1.12E+08 | 1.12E+08 | G | A | exonic          | synonymous SNV    | TPCN1     | NM_017901:c.G1278A:p.T426T     | rs34498203 |      | D1 |
| chr13 | 23931200 | 23931200 | T | A | exonic          | synonymous SNV    | PARP4     | NM_006437:c.A2406T:p.T802T     | rs1130941  |      | D1 |
| chr13 | 39191436 | 39191436 | C | T | exonic          | nonsynonymous SN\ | COG6      | NM_001145079:c.C1348T:p.R450C  |            | 0.01 | D1 |
| chr15 | 45851167 | 45851167 | A | C | exonic          | synonymous SNV    | SEMA6D    | NM_020858:c.A2929C:p.R977R     |            |      | D1 |
| chr15 | 98927416 | 98927416 | C | A | exonic          | synonymous SNV    | LINS      | NM_001040616:c.G1824T:p.G608C  | rs6598356  |      | D1 |
| chr16 | 52061435 | 52061435 | G | A | exonic          | synonymous SNV    | RBL2      | NM_005611:c.G2082A:p.T694T     | rs1131220  |      | D1 |
| chr16 | 65505631 | 65505631 | G | A | exonic          | nonsynonymous SN\ | CDH16     | NM_001204746:c.C478T:p.H160Y   | rs2271023  | 0.06 | D1 |
| chr16 | 66045043 | 66045043 | G | C | exonic          | synonymous SNV    | ATP6V0D1  | NM_004691:c.C207G:p.V69V       |            |      | D1 |
| chr17 | 1935830  | 1935830  | G | T | exonic          | nonsynonymous SN\ | SMG6      | NM_001170957:c.C3380A:p.P1127H |            | 0.02 | D1 |
| chr17 | 7519131  | 7519131  | C | T | exonic          | nonsynonymous SN\ | TP53      | NM_001126115:c.G128A:p.R43H    | rs28934578 | 0    | D1 |
| chr17 | 21149006 | 21149006 | C | T | exonic          | synonymous SNV    | MAP2K3    | NM_002756:c.C660T:p.S220S      | rs1657695  |      | D1 |
| chr17 | 69745066 | 69745066 | G | A | exonic          | synonymous SNV    | TTYH2     | NM_032646:c.G453A:p.E151E      |            |      | D1 |
| chr17 | 69745067 | 69745067 | C | G | exonic          | nonsynonymous SN\ | TTYH2     | NM_032646:c.C454G:p.Q152E      |            | 1    | D1 |
| chr18 | 6228018  | 6228018  | A | C | exonic          | stopgain SNV      | L3MBTL4   | NM_173464:c.T729G:p.Y243X      |            | 1    | D1 |
| chr18 | 59459171 | 59459171 | G | C | exonic          | nonsynonymous SN\ | SERPINB4  | NM_002974:c.C386G:p.T129S      |            | 0.03 | D1 |
| chr19 | 14922129 | 14922129 | G | A | exonic          | nonsynonymous SN\ | SLC1A6    | NM_005071:c.C1573T:p.R525W     |            | 0.01 | D1 |
| chr20 | 2722868  | 2722868  | G | A | exonic          | nonsynonymous SN\ | CPXM1     | NM_001184699:c.C1951T:p.R651C  |            | 0    | D1 |
| chr20 | 44117058 | 44117058 | C | T | exonic          | nonsynonymous SN\ | SLC12A5   | NM_001134771:c.C2845T:p.R949W  |            | 0.01 | D1 |

|       |          |          |   |   |                 |                   |           |                                |            |      |     |
|-------|----------|----------|---|---|-----------------|-------------------|-----------|--------------------------------|------------|------|-----|
| chrX  | 53659521 | 53659521 | C | T | exonic;splicing | nonsynonymous SN\ | HUWE1     | NM_031407:c.G1958A;p.G653E     | 0          | D1   |     |
| chrX  | 1.1E+08  | 1.1E+08  | G | T | exonic          | synonymous SNV    | CHRD1     | NM_001143983:c.C435A;p.R145R   |            | D1   |     |
| chr1  | 51644240 | 51644240 | A | C | exonic          | nonsynonymous SN\ | EPS15     | NM_001159969:c.T660G;p.S220R   | 0.04       | D19  |     |
| chr1  | 51644241 | 51644241 | C | T | exonic          | nonsynonymous SN\ | EPS15     | NM_001159969:c.G659A;p.S220N   | 0.1        | D19  |     |
| chr1  | 1.51E+08 | 1.51E+08 | G | T | exonic          | nonsynonymous SN\ | SPRR3     | NM_001097589:c.G241T;p.G81C    | 0.12       | D19  |     |
| chr2  | 61569317 | 61569317 | A | C | exonic          | nonsynonymous SN\ | XPO1      | NM_003400:c.T2116G;p.F706V     |            | D19  |     |
| chr2  | 63036241 | 63036241 | C | T | exonic          | nonsynonymous SN\ | EHBP1     | NM_001142614:c.C2402T;p.A801V  | 0          | D19  |     |
| chr2  | 1E+08    | 1E+08    | C | T | exonic          | nonsynonymous SN\ | NMS       | NM_001011717:c.C313T;p.R105W   | 0          | D19  |     |
| chr2  | 1.16E+08 | 1.16E+08 | C | A | exonic          | nonsynonymous SN\ | DPP10     | NM_001004360:c.C1087A;p.Q363K  | 0.36       | D19  |     |
| chr2  | 1.21E+08 | 1.21E+08 | G | A | exonic          | nonsynonymous SN\ | GLI2      | NM_005270:c.G3916A;p.D1306N    | rs12711538 | 1    | D19 |
| chr2  | 2.09E+08 | 2.09E+08 | C | G | exonic          | nonsynonymous SN\ | IDH1      | NM_005896:c.G629C;p.S210T      | 0.06       | D19  |     |
| chr2  | 2.09E+08 | 2.09E+08 | T | C | exonic          | nonsynonymous SN\ | IDH1      | NM_005896:c.A628G;p.S210G      | 0.01       | D19  |     |
| chr2  | 2.13E+08 | 2.13E+08 | G | A | exonic          | nonsynonymous SN\ | ERBB4     | NM_001042599:c.C283T;p.R95C    | 0.02       | D19  |     |
| chr3  | 38714798 | 38714798 | G | A | exonic          | synonymous SNV    | SCN10A    | NM_006514:c.C4917T;p.D1639D    |            | D19  |     |
| chr3  | 71147475 | 71147475 | G | A | exonic          | nonsynonymous SN\ | FOXP1     | NM_032682:c.C889T;p.P297S      | 0.12       | D19  |     |
| chr4  | 1.55E+08 | 1.55E+08 | G | A | exonic          | synonymous SNV    | TLR2      | NM_003264:c.G348A;p.S116S      |            | D19  |     |
| chr5  | 82872935 | 82872935 | A | T | exonic          | nonsynonymous SN\ | VCAN      | NM_001164097:c.A5396T;p.H1799L | 0          | D19  |     |
| chr5  | 96277196 | 96277196 | A | C | exonic          | synonymous SNV    | ERAP2     | NM_001130140:c.A2706C;p.T902T  |            | D19  |     |
| chr5  | 1.12E+08 | 1.12E+08 | C | T | exonic          | stopgain SNV      | APC       | NM_000038:c.C694T;p.R232X      | 0.29       | D19  |     |
| chr5  | 1.12E+08 | 1.12E+08 | T | A | exonic          | stopgain SNV      | APC       | NM_001127511:c.T3240A;p.C1080X | 0          | D19  |     |
| chr5  | 1.49E+08 | 1.49E+08 | C | T | exonic          | nonsynonymous SN\ | ABLIM3    | NM_014945:c.C712T;p.R238C      | 0          | D19  |     |
| chr5  | 1.61E+08 | 1.61E+08 | G | A | exonic          | nonsynonymous SN\ | GABRG2    | NM_000816:c.G472A;p.A158T      | 0.37       | D19  |     |
| chr5  | 1.77E+08 | 1.77E+08 | G | C | exonic          | nonsynonymous SN\ | DOK3      | NM_001144876:c.C155G;p.S52C    | 0.01       | D19  |     |
| chr7  | 1.16E+08 | 1.16E+08 | G | T | exonic          | synonymous SNV    | MET       | NM_000245:c.G3285T;p.G1095G    |            | D19  |     |
| chr8  | 69155246 | 69155246 | G | A | exonic          | nonsynonymous SN\ | PREX2     | NM_024870:c.G1657A;p.E553K     | 0.21       | D19  |     |
| chr9  | 36659402 | 36659402 | C | T | exonic;splicing | nonsynonymous SN\ | MELK;MELK | NM_014791:c.C1504T;p.R502W     | 0          | D19  |     |
| chr10 | 70376243 | 70376243 | C | T | exonic          | nonsynonymous SN\ | DDX50     | NM_024045:c.C2065T;p.R689W     | 0          | D19  |     |
| chr11 | 65549433 | 65549433 | G | A | exonic          | nonsynonymous SN\ | CATSPER1  | NM_053054:c.C994T;p.R332W      | 0.03       | D19  |     |
| chr11 | 65856427 | 65856427 | C | T | exonic          | nonsynonymous SN\ | RIN1      | NM_004292:c.G2248A;p.E750K     | 0          | D19  |     |
| chr11 | 77405940 | 77405940 | C | T | exonic          | nonsynonymous SN\ | KCTD14    | NM_023930:c.G115A;p.V39I       | 0.7        | D19  |     |
| chr12 | 1.29E+08 | 1.29E+08 | C | T | exonic          | nonsynonymous SN\ | RIMBP2    | NM_015347:c.G1000A;p.V334I     | 0.44       | D19  |     |
| chr13 | 45628644 | 45628644 | G | T | exonic          | synonymous SNV    | LCP1      | NM_002298:c.C421A;p.R141R      |            | D19  |     |
| chr14 | 23594320 | 23594320 | G | A | exonic          | nonsynonymous SN\ | LRRCL16B  | NM_138360:c.G566A;p.R189Q      | 0          | D19  |     |
| chr15 | 29115046 | 29115046 | G | A | exonic          | stopgain SNV      | TRPM1     | NM_002420:c.C2629T;p.R877X     | 0          | D19  |     |
| chr17 | 64436919 | 64436919 | C | T | exonic          | nonsynonymous SN\ | ABCA8     | NM_007168:c.G991A;p.G331S      | rs4147979  | 0.63 | D19 |
| chr18 | 8366165  | 8366165  | C | T | exonic          | nonsynonymous SN\ | PTPRM     | NM_002845:c.C3254T;p.P1085L    | 0.01       | D19  |     |
| chr19 | 8102520  | 8102520  | A | T | exonic          | synonymous SNV    | FBN3      | NM_032447:c.T1908A;p.T636T     |            | D19  |     |
| chr19 | 8933975  | 8933975  | G | A | exonic          | nonsynonymous SN\ | MUC16     | NM_024690:c.C14471T;p.T4824M   | rs17000816 | D19  |     |
| chr19 | 9826347  | 9826347  | G | A | exonic          | nonsynonymous SN\ | OLFM2     | NM_058164:c.C880T;p.R294C      | 0.02       | D19  |     |
| chr19 | 15156231 | 15156231 | C | T | exonic          | nonsynonymous SN\ | NOTCH3    | NM_000435:c.G2441A;p.C814Y     | 0          | D19  |     |
| chr21 | 45131136 | 45131136 | G | A | exonic          | synonymous SNV    | ITGB2     | NM_000211:c.C2190T;p.S730S     |            | D19  |     |
| chrX  | 15249770 | 15249770 | G | A | exonic          | stopgain SNV      | PIGA      | NM_020473:c.C532T;p.R178X      | 0.02       | D19  |     |
| chrX  | 67858121 | 67858121 | G | A | exonic          | stopgain SNV      | STARD8    | NM_001142504:c.G2027A;p.W676X  | 0.05       | D19  |     |
| chrX  | 69511782 | 69511782 | G | T | exonic          | nonsynonymous SN\ | KIF4A     | NM_012310:c.G1782T;p.L594F     | 0          | D19  |     |
| chrX  | 1.14E+08 | 1.14E+08 | G | A | exonic          | synonymous SNV    | HTR2C     | NM_000868:c.G501A;p.S167S      |            | D19  |     |
| chrX  | 1.31E+08 | 1.31E+08 | C | T | exonic          | nonsynonymous SN\ | RAP2C     | NM_021183:c.G485A;p.R162K      | 0.12       | D19  |     |
| chr1  | 33765409 | 33765409 | C | T | exonic          | nonsynonymous SN\ | CSMD2     | NM_052896:c.G9776A;p.R3259Q    | 0.5        | D21  |     |
| chr2  | 39087119 | 39087119 | T | C | exonic          | nonsynonymous SN\ | SOS1      | NM_005633:c.A2729G;p.D910G     | 0.12       | D21  |     |
| chr3  | 62493728 | 62493728 | C | T | exonic          | nonsynonymous SN\ | CADPS     | NM_003716:c.G2149A;p.A717T     | 0          | D21  |     |
| chr3  | 1.53E+08 | 1.53E+08 | G | T | exonic          | nonsynonymous SN\ | MED12L    | NM_053002:c.G5513T;p.R1838I    |            | D21  |     |
| chr3  | 1.54E+08 | 1.54E+08 | G | A | exonic          | nonsynonymous SN\ | MBNL1     | NM_207293:c.G251A;p.R84H       | 0.02       | D21  |     |
| chr3  | 1.86E+08 | 1.86E+08 | G | A | exonic          | nonsynonymous SN\ | EIF4G1    | NM_004953:c.G2858A;p.R953Q     | 0          | D21  |     |
| chr5  | 13845128 | 13845128 | G | A | exonic          | nonsynonymous SN\ | DNAH5     | NM_001369:c.C8423T;p.T2808I    | 0.34       | D21  |     |

|       |          |          |   |   |                 |                   |           |                                |            |      |     |
|-------|----------|----------|---|---|-----------------|-------------------|-----------|--------------------------------|------------|------|-----|
| chr5  | 14551296 | 14551296 | A | G | exonic          | nonsynonymous SN\ | TRIO      | NM_007118:c.A8146G:p.I2716V    | 0.36       | D21  |     |
| chr5  | 1.12E+08 | 1.12E+08 | G | T | exonic          | stopgain SNV      | APC       | NM_001127511:c.G3808T:p.G1270X | 0.01       | D21  |     |
| chr5  | 1.46E+08 | 1.46E+08 | T | C | exonic          | nonsynonymous SN\ | LARS      | NM_020117:c.A1679G:p.N560S     |            | D21  |     |
| chr6  | 26292202 | 26292202 | T | C | exonic          | nonsynonymous SN\ | HIST1H2BE | NM_003523:c.T200C:p.V67A       | 0          | D21  |     |
| chr6  | 1.3E+08  | 1.3E+08  | G | T | exonic          | stopgain SNV      | L3MBTL3   | NM_001007102:c.G1174T:p.E392X  | 0.02       | D21  |     |
| chr7  | 2921458  | 2921458  | C | T | exonic          | synonymous SNV    | CARD11    | NM_032415:c.G2778A:p.P926P     |            | D21  |     |
| chr8  | 91034934 | 91034934 | T | C | exonic          | nonsynonymous SN\ | NBN       | NM_002485:c.A1559G:p.N520S     | 0.78       | D21  |     |
| chr9  | 1.23E+08 | 1.23E+08 | C | T | exonic;splicing | synonymous SNV    | C5;C5     | NM_001735:c.G4398A:p.S1466S    |            | D21  |     |
| chr10 | 18827403 | 18827403 | T | C | exonic          | synonymous SNV    | CACNB2    | NM_000724:c.T282C:p.H94H       |            | D21  |     |
| chr10 | 96731083 | 96731083 | G | T | exonic          | nonsynonymous SN\ | CYP2C9    | NM_000771:c.G1115T:p.C372F     | 0.02       | D21  |     |
| chr11 | 18269894 | 18269894 | T | A | exonic          | nonsynonymous SN\ | HPS5      | NM_007216:c.A1769T:p.K590I     | 0.02       | D21  |     |
| chr11 | 55320299 | 55320299 | G | A | exonic          | nonsynonymous SN\ | OR5D14    | NM_001004735:c.G692A:p.R231H   | 0.15       | D21  |     |
| chr12 | 3562554  | 3562554  | C | T | exonic          | nonsynonymous SN\ | PRMT8     | NM_019854:c.C898T:p.R300C      | 0          | D21  |     |
| chr12 | 25269914 | 25269914 | T | A | exonic          | nonsynonymous SN\ | KRAS      | NM_004985:c.A351T:p.K117N      | 0          | D21  |     |
| chr12 | 88268504 | 88268504 | G | T | exonic          | nonsynonymous SN\ | DUSP6     | NM_001946:c.C830A:p.S277Y      | 0.01       | D21  |     |
| chr13 | 35807341 | 35807341 | C | T | exonic          | synonymous SNV    | SPG20     | NM_001142294:c.G627A:p.P209P   |            | D21  |     |
| chr13 | 37218256 | 37218256 | A | G | exonic          | nonsynonymous SN\ | TRPC4     | NM_001135955:c.T715C:p.S239P   | 0.02       | D21  |     |
| chr13 | 59138792 | 59138792 | A | C | exonic          | nonsynonymous SN\ | DIAPH3    | NM_001042517:c.T3509G:p.L1170R |            | D21  |     |
| chr13 | 1.08E+08 | 1.08E+08 | G | A | exonic          | nonsynonymous SN\ | MYO16     | NM_001198950:c.G1751A:p.C584Y  | 0          | D21  |     |
| chr14 | 61636926 | 61636926 | G | A | exonic          | synonymous SNV    | SYT16     | NM_031914:c.G1686A:p.T562T     |            | D21  |     |
| chr15 | 20554344 | 20554344 | C | T | exonic          | nonsynonymous SN\ | CYFIP1    | NM_001033028:c.C2332T:p.R778C  | 0          | D21  |     |
| chr15 | 51812524 | 51812524 | C | T | exonic          | nonsynonymous SN\ | WDR72     | NM_182758:c.G115A:p.G39S       | 0          | D21  |     |
| chr16 | 10908533 | 10908533 | C | T | exonic          | synonymous SNV    | CITA      | NM_000246:c.C1683T:p.D561D     | rs76686583 | D21  |     |
| chr17 | 1526087  | 1526087  | C | T | exonic          | nonsynonymous SN\ | PRPF8     | NM_006445:c.G2564A:p.R855Q     | 0          | D21  |     |
| chr17 | 24211641 | 24211641 | A | T | exonic          | nonsynonymous SN\ | ERAL1     | NM_005702:c.A1258T:p.M420L     | 0.55       | D21  |     |
| chr17 | 53975262 | 53975262 | G | A | exonic          | nonsynonymous SN\ | C17orf47  | NM_001038704:c.C1285T:p.P429S  | 0.36       | D21  |     |
| chr19 | 45520104 | 45520104 | C | T | exonic          | nonsynonymous SN\ | C19orf47  | NM_178830:c.G593A:p.R198H      | 0          | D21  |     |
| chr19 | 48463913 | 48463913 | C | A | exonic          | nonsynonymous SN\ | PSG9      | NM_002784:c.G293T:p.R98I       | 0          | D21  |     |
| chr19 | 62741055 | 62741055 | G | A | exonic          | nonsynonymous SN\ | ZNF549    | NM_153263:c.G832A:p.V278I      | rs61735033 | 0.99 | D21 |
| chrX  | 41264778 | 41264778 | G | A | exonic          | nonsynonymous SN\ | CASK      | NM_001126055:c.C2533T:p.R845C  | 0          | D21  |     |
| chr1  | 4732397  | 4732397  | C | T | exonic          | nonsynonymous SN\ | AJAP1     | NM_001042478:c.C1115T:p.T372M  | 0.33       | D9   |     |
| chr1  | 35717250 | 35717250 | T | G | exonic          | nonsynonymous SN\ | KIAA0319L | NM_024874:c.A817C:p.T273P      | 0.11       | D9   |     |
| chr1  | 2.14E+08 | 2.14E+08 | G | A | exonic          | nonsynonymous SN\ | USH2A     | NM_206933:c.C11840T:p.S3947F   | 0.02       | D9   |     |
| chr2  | 15437338 | 15437338 | G | C | exonic          | nonsynonymous SN\ | NBAS      | NM_015909:c.C3429G:p.H1143Q    | 0.65       | D9   |     |
| chr3  | 9909830  | 9909830  | G | A | exonic          | nonsynonymous SN\ | JAGN1     | NM_032492:c.G321A:p.M107I      | 0.11       | D9   |     |
| chr3  | 1.6E+08  | 1.6E+08  | G | A | exonic          | synonymous SNV    | GFM1      | NM_024996:c.G1668A:p.L556L     |            | D9   |     |
| chr3  | 1.75E+08 | 1.75E+08 | T | G | exonic          | synonymous SNV    | NLGN1     | NM_014932:c.T561G:p.G187G      |            | D9   |     |
| chr4  | 38375241 | 38375241 | C | T | exonic          | nonsynonymous SN\ | KLF3      | NM_016531:c.C1000T:p.H334Y     | 0          | D9   |     |
| chr4  | 77850451 | 77850451 | C | T | exonic          | nonsynonymous SN\ | SHROOM3   | NM_020859:c.C442T:p.R148W      | 0          | D9   |     |
| chr4  | 85967124 | 85967124 | C | T | exonic          | nonsynonymous SN\ | WDFY3     | NM_014991:c.G991A:p.A331T      | 0.01       | D9   |     |
| chr4  | 1.3E+08  | 1.3E+08  | C | T | splicing        |                   | SCLT1     |                                |            | D9   |     |
| chr4  | 1.42E+08 | 1.42E+08 | G | A | exonic          | synonymous SNV    | RNF150    | NM_020724:c.C1074T:p.S358S     |            | D9   |     |
| chr4  | 1.69E+08 | 1.69E+08 | G | A | exonic          | nonsynonymous SN\ | DDX60     | NM_017631:c.C3947T:p.A1316V    | 0.04       | D9   |     |
| chr5  | 22011125 | 22011125 | C | A | exonic          | stopgain SNV      | CDH12     | NM_004061:c.G358T:p.E120X      | 0          | D9   |     |
| chr5  | 1.12E+08 | 1.12E+08 | G | T | exonic          | stopgain SNV      | APC       | NM_000038:c.G673T:p.E225X      | 0.01       | D9   |     |
| chr5  | 1.69E+08 | 1.69E+08 | G | A | exonic          | nonsynonymous SN\ | DOCK2     | NM_004946:c.G338A:p.R113H      | 0.17       | D9   |     |
| chr7  | 1.23E+08 | 1.23E+08 | T | C | exonic          | synonymous SNV    | HYAL4     | NM_012269:c.T783C:p.S261S      |            | D9   |     |
| chr8  | 15525025 | 15525025 | G | T | exonic          | nonsynonymous SN\ | TUSC3     | NM_006765:c.G204T:p.M68I       | 0.11       | D9   |     |
| chr8  | 97961357 | 97961357 | C | A | exonic          | nonsynonymous SN\ | PGCP      | NM_016134:c.C797A:p.T266N      | 0.08       | D9   |     |
| chr9  | 19540247 | 19540247 | T | G | exonic          | nonsynonymous SN\ | SLC24A2   | NM_001193288:c.A1316C:p.D439A  | 0.13       | D9   |     |
| chr12 | 68475347 | 68475347 | C | T | exonic          | stopgain SNV      | RAB3IP    | NM_001024647:c.C226T:p.Q76X    | 1          | D9   |     |
| chr13 | 96841628 | 96841628 | T | A | exonic          | stopgain SNV      | MBNL2     | NM_207304:c.T1010A:p.L337X     |            | D9   |     |
| chr13 | 1.07E+08 | 1.07E+08 | C | T | exonic          | nonsynonymous SN\ | FAM155A   | NM_001080396:c.G1303A:p.A435T  | 0          | D9   |     |

|       |          |          |   |   |          |                   |           |                                |             |      |     |
|-------|----------|----------|---|---|----------|-------------------|-----------|--------------------------------|-------------|------|-----|
| chr15 | 43045678 | 43045678 | A | T | exonic   | nonsynonymous SN\ | C15orf43  | NM_152448:c.A379T:p.T127S      | 0.76        | D9   |     |
| chr15 | 83171793 | 83171793 | G | A | exonic   | nonsynonymous SN\ | ALPK3     | NM_020778:c.G863A:p.R288Q      | 0.01        | D9   |     |
| chr16 | 17129111 | 17129111 | T | A | exonic   | synonymous SNV    | XYLT1     | NM_022166:c.A2136T:p.L712L     |             | D9   |     |
| chr16 | 52073130 | 52073130 | C | T | exonic   | nonsynonymous SN\ | RBL2      | NM_005611:c.C3131T:p.S1044F    | 0           | D9   |     |
| chr16 | 60409030 | 60409030 | T | A | exonic   | synonymous SNV    | CDH8      | NM_001796:c.A1131T:p.T377T     |             | D9   |     |
| chr16 | 73495386 | 73495386 | T | C | exonic   | nonsynonymous SN\ | WDR59     | NM_030581:c.A1826G:p.K609R     | 0.75        | D9   |     |
| chr17 | 7517845  | 7517845  | C | T | exonic   | nonsynonymous SN\ | TP53      | NM_001126115:c.G422A:p.R141H   | rs28934576  | 0.01 | D9  |
| chr17 | 30705071 | 30705071 | A | T | exonic   | nonsynonymous SN\ | SLFN11    | NM_152270:c.T1319A:p.I440N     |             | 0    | D9  |
| chr17 | 52417750 | 52417750 | G | A | exonic   | nonsynonymous SN\ | SCPEP1    | NM_021626:c.G238A:p.G80S       |             | 0.11 | D9  |
| chr18 | 39108313 | 39108313 | C | G | exonic   | nonsynonymous SN\ | SYT4      | NM_020783:c.G79C:p.V27L        |             | 0.11 | D9  |
| chr19 | 17862749 | 17862749 | G | A | exonic   | nonsynonymous SN\ | SLC5A5    | NM_000453:c.G1706A:p.R569Q     |             | 0.33 | D9  |
| chr19 | 18817802 | 18817802 | G | A | exonic   | nonsynonymous SN\ | UPF1      | NM_002911:c.G245A:p.G82D       |             | 0.33 | D9  |
| chr19 | 48851482 | 48851482 | T | G | exonic   | nonsynonymous SN\ | PLAUR     | NM_001005376:c.A556C:p.T186P   |             | 0    | D9  |
| chr19 | 61719556 | 61719556 | A | G | exonic   | nonsynonymous SN\ | ZNF471    | NM_020813:c.A134G:p.E45G       |             | 0.01 | D9  |
| chr20 | 33705638 | 33705638 | G | A | exonic   | stopgain SNV      | RBM12     | NM_001198840:c.C1021T:p.R341X  |             | 1    | D9  |
| chr20 | 44073654 | 44073654 | A | C | exonic   | nonsynonymous SN\ | MMP9      | NM_004994:c.A858C:p.K286N      |             | 0.27 | D9  |
| chr20 | 44749099 | 44749099 | G | A | exonic   | synonymous SNV    | TP53RK    | NM_033550:c.C462T:p.H154H      |             |      | D9  |
| chr21 | 44370419 | 44370419 | G | A | exonic   | nonsynonymous SN\ | PWP2      | NM_005049:c.G2065A:p.V689I     |             | 0.04 | D9  |
| chr22 | 20652019 | 20652019 | C | T | exonic   | nonsynonymous SN\ | TOP3B     | NM_003935:c.G808A:p.A270T      |             | 0.07 | D9  |
| chrX  | 26067033 | 26067033 | G | A | exonic   | nonsynonymous SN\ | MAGEB18   | NM_173699:c.G10A:p.G4S         |             | 0.15 | D9  |
| chrX  | 50106516 | 50106516 | C | T | exonic   | synonymous SNV    | CCNB3     | NM_033670:c.C468T:p.I156I      |             |      | D9  |
| chr1  | 19296317 | 19296317 | G | A | exonic   | synonymous SNV    | UBR4      | NM_020765:c.C13347T:p.G4449G   |             |      | D20 |
| chr1  | 35619925 | 35619925 | G | T | exonic   | synonymous SNV    | ZMYM4     | NM_005095:c.G1548T:p.S516S     |             |      | D20 |
| chr1  | 70276628 | 70276628 | C | T | exonic   | nonsynonymous SN\ | LRRC7     | NM_020794:c.C2419T:p.R807C     |             | 0    | D20 |
| chr1  | 1.09E+08 | 1.09E+08 | C | T | exonic   | nonsynonymous SN\ | WDR47     | NM_001142550:c.G2477A:p.G826D  |             | 0    | D20 |
| chr1  | 1.57E+08 | 1.57E+08 | C | T | exonic   | nonsynonymous SN\ | OR6Y1     | NM_001005189:c.G754A:p.V252I   | rs41273491  | 0.18 | D20 |
| chr2  | 61129170 | 61129170 | C | T | exonic   | nonsynonymous SN\ | PEX13     | NM_002618:c.C973T:p.L325F      |             | 0.12 | D20 |
| chr3  | 58495267 | 58495267 | C | T | exonic   | synonymous SNV    | ACO2      | NM_003500:c.G183A:p.P61P       |             |      | D20 |
| chr3  | 1.53E+08 | 1.53E+08 | G | A | exonic   | nonsynonymous SN\ | IGSF10    | NM_178822:c.C5056T:p.P1686S    |             | 0.08 | D20 |
| chr3  | 1.53E+08 | 1.53E+08 | C | T | exonic   | nonsynonymous SN\ | IGSF10    | NM_178822:c.G3052A:p.G1018R    |             | 0    | D20 |
| chr4  | 25017941 | 25017941 | G | A | exonic   | nonsynonymous SN\ | ANAPC4    | NM_013367:c.G1399A:p.G467R     |             | 0.09 | D20 |
| chr5  | 1.12E+08 | 1.12E+08 | G | T | exonic   | stopgain SNV      | APC       | NM_001127511:c.G4135T:p.E1379X |             | 0.16 | D20 |
| chr5  | 1.41E+08 | 1.41E+08 | G | A | exonic   | synonymous SNV    | PCDHGA7   | NM_018920:c.G1677A:p.P559P     |             |      | D20 |
| chr6  | 1.66E+08 | 1.66E+08 | C | T | exonic   | synonymous SNV    | C6orf118  | NM_144980:c.G96A:p.T32T        |             |      | D20 |
| chr7  | 98983900 | 98983900 | C | T | exonic   | nonsynonymous SN\ | FAM200A   | NM_145111:c.G67A:p.V23M        |             |      | D20 |
| chr8  | 14139490 | 14139490 | T | A | exonic   | nonsynonymous SN\ | SGCZ      | NM_139167:c.A406T:p.T136S      |             | 0.13 | D20 |
| chr8  | 1.17E+08 | 1.17E+08 | C | T | exonic   | nonsynonymous SN\ | TRPS1     | NM_014112:c.G2545A:p.A849T     |             | 0    | D20 |
| chr9  | 1.03E+08 | 1.03E+08 | C | T | exonic   | nonsynonymous SN\ | GRIN3A    | NM_133445:c.G2590A:p.V864M     |             | 0.01 | D20 |
| chr11 | 55814749 | 55814749 | G | A | exonic   | synonymous SNV    | OR8H1     | NM_001005199:c.C366T:p.Y122Y   |             |      | D20 |
| chr11 | 89536247 | 89536247 | T | G | splicing |                   | NAALAD2   |                                |             |      | D20 |
| chr12 | 51230103 | 51230103 | G | A | exonic   | synonymous SNV    | KRT71     | NM_033448:c.C633T:p.D211D      | rs113716134 |      | D20 |
| chr12 | 53253421 | 53253421 | C | A | exonic   | synonymous SNV    | PDE1B     | NM_001165975:c.C792A:p.I264I   |             |      | D20 |
| chr12 | 1.1E+08  | 1.1E+08  | G | A | exonic   | synonymous SNV    | CUX2      | NM_015267:c.G1101A:p.T367T     |             |      | D20 |
| chr12 | 1.23E+08 | 1.23E+08 | C | T | exonic   | nonsynonymous SN\ | DNAH10    | NM_207437:c.C1055T:p.T352M     |             | 0.06 | D20 |
| chr12 | 1.29E+08 | 1.29E+08 | C | T | exonic   | synonymous SNV    | FZD10     | NM_007197:c.C1176T:p.N392N     |             |      | D20 |
| chr15 | 38653039 | 38653039 | C | T | exonic   | nonsynonymous SN\ | RPUSD2    | NM_152260:c.C925T:p.R309W      |             | 0    | D20 |
| chr15 | 42679988 | 42679988 | C | A | exonic   | stopgain SNV      | SPG11     | NM_001160227:c.G3655T:p.E1219X |             | 0.19 | D20 |
| chr16 | 21655178 | 21655178 | C | A | exonic   | nonsynonymous SN\ | OTOA      | NM_170664:c.C1425A:p.S475R     |             | 0.28 | D20 |
| chr16 | 22268243 | 22268243 | G | T | exonic   | nonsynonymous SN\ | CDR2      | NM_001802:c.C364A:p.L122M      |             | 0    | D20 |
| chr17 | 7517863  | 7517863  | C | G | exonic   | nonsynonymous SN\ | TP53      | NM_001126115:c.G404C:p.R135P   |             | 0    | D20 |
| chr18 | 59736199 | 59736199 | G | A | exonic   | synonymous SNV    | SERPINB10 | NM_005024:c.G255A:p.S85S       |             |      | D20 |
| chr19 | 7883228  | 7883228  | C | T | exonic   | nonsynonymous SN\ | MAP2K7    | NM_145185:c.C1172T:p.A391V     |             |      | D20 |
| chr19 | 37829276 | 37829276 | A | G | exonic   | nonsynonymous SN\ | ANKRD27   | NM_032139:c.T299C:p.F100S      |             | 0    | D20 |

|       |          |          |   |   |        |                   |       |                              |           |     |
|-------|----------|----------|---|---|--------|-------------------|-------|------------------------------|-----------|-----|
| chr20 | 54257600 | 54257600 | C | T | exonic | synonymous SNV    | MC3R  | NM_019888:c.C294T:p.I98I     |           | D20 |
| chr21 | 44043952 | 44043952 | T | C | exonic | synonymous SNV    | RRP1  | NM_003683:c.T885C:p.V295V    | rs4566449 | D20 |
| chrX  | 12748771 | 12748771 | C | T | exonic | synonymous SNV    | PRPS2 | NM_001039091:c.C801T:p.A267A |           | D20 |
| chrX  | 1.54E+08 | 1.54E+08 | C | A | exonic | nonsynonymous SNV | F8    | NM_000132:c.G3469T:p.V1157L  | 0.05      | D20 |

---
