# Supplementary material for: Novel recurrently mutated genes and a prognostic mutation signature in colorectal cancer
Source: HighWire-hosted journal article supplement (doi:10.1136/gutjnl-2013-306620), 2014-06-20
Supplement: gutjnl-2013-306620supp_tableS3.pdf [file gutjnl-2013-306620supp_tableS3.pdf]

**Table S3.** A complete list of somatic small indels identified in 22 colorectal cancer patients by exome sequencing.

| Chror | Start   | End     | Ref         | Obs  | Func            | ExonicFunc              | Gene     | Amino acid change                             | mutated | sample |
|-------|---------|---------|-------------|------|-----------------|-------------------------|----------|-----------------------------------------------|---------|--------|
| chr1  | 1.5E+08 | 1.5E+08 | C           | -    | exonic          | frameshift deletion     | PGLYRP4  | NM_020393:c.187delG;p.A63fs                   | D22     |        |
| chr2  | 7.3E+07 | 7.3E+07 | C           | -    | exonic          | frameshift deletion     | SPR      | NM_003124:c.598delC;p.P200fs                  | D22     |        |
| chr5  | 4.3E+07 | 4.3E+07 | AA          | -    | exonic          | frameshift deletion     | SEPP1    | NM_005410:c.379_380del;p.127_127del           | D22     |        |
| chr5  | 1.1E+08 | 1.1E+08 | GT          | -    | exonic          | frameshift deletion     | APC      | NM_001127511:c.3922_3923del;p.1308_1308del    | D22     |        |
| chr2  | 1.6E+08 | 1.6E+08 | -           | A    | exonic          | frameshift insertion    | KCNH7    | NM_173162:c.1957_1958insT;p.G653fs            | D15     |        |
| chr3  | 1.4E+08 | 1.4E+08 | ATTAA       | -    | exonic          | frameshift deletion     | RASA2    | NM_006506:c.1321_1325del;p.441_442del         | D15     |        |
| chr6  | 3.6E+07 | 3.6E+07 | -           | C    | exonic          | frameshift insertion    | RPL10A   | NM_007104:c.594_595insC;p.W198fs              | D15     |        |
| chr7  | 4.7E+07 | 4.7E+07 | -           | GG   | exonic          | frameshift insertion    | TNS3     | NM_022748:c.860_861insCC;p.R287fs             | D15     |        |
| chr8  | 8.3E+07 | 8.3E+07 | GTGGGTTTGGC | -    | exonic          | nonframeshift deletion  | PMP2     | NM_002677:c.90_119del;p.30_40del              | D15     |        |
| chr9  | 1.3E+08 | 1.3E+08 | CCT         | -    | exonic          | nonframeshift deletion  | GOLGA2   | NM_004486:c.2144_2146del;p.715_716del         | D15     |        |
| chr1  | 2.7E+07 | 2.7E+07 | -           | GT   | exonic          | frameshift insertion    | ARID1A   | NM_006015:c.6357_6358insGT;p.L2119fs          | D17     |        |
| chr1  | 1.5E+08 | 1.5E+08 | CCCAGGGCC   | -    | exonic          | nonframeshift deletion  | EFNA4    | NM_005227:c.189_197del;p.63_66del             | D4      |        |
| chr3  | 1.9E+07 | 1.9E+07 | AAG         | -    | exonic          | nonframeshift deletion  | KCNH8    | NM_144633:c.437_439del;p.146_147del           | D4      |        |
| chr4  | 5.7E+07 | 5.7E+07 | A           | -    | exonic          | frameshift deletion     | AASDH    | NM_181806:c.1319delT;p.L440fs                 | D4      |        |
| chr5  | 1.1E+08 | 1.1E+08 | AC          | -    | exonic          | frameshift deletion     | APC      | NM_001127511:c.2431_2432del;p.811_811del      | D4      |        |
| chr9  | 1.3E+08 | 1.3E+08 | CCT         | -    | exonic          | nonframeshift deletion  | GOLGA2   | NM_004486:c.2144_2146del;p.715_716del         | D4      |        |
| chr14 | 5.2E+07 | 5.2E+07 | T           | -    | exonic          | frameshift deletion     | PSMC6    | NM_002806:c.665delT;p.I222fs                  | D4      |        |
| chr19 | 5.8E+07 | 5.8E+07 | -           | TGTG | exonic          | frameshift insertion    | ZNF83    | NM_018300:c.1178_1179insCAC;p.R393fs          | D4      |        |
| chr21 | 2.9E+07 | 2.9E+07 | T           | -    | exonic          | frameshift deletion     | LTN1     | NM_015565:c.1745delA;p.N582fs                 | D4      |        |
| chr7  | 2439420 | 2439420 | T           | -    | exonic          | frameshift deletion     | CHST12   | NM_018641:c.620delT;p.V207fs                  | D19     |        |
| chr19 | 4.2E+07 | 4.2E+07 | -           | T    | exonic          | frameshift insertion    | ZNF790   | NM_206894:c.443_444insA;p.R148fs              | D19     |        |
| chr2  | 4.7E+07 | 4.7E+07 | G           | -    | exonic          | frameshift deletion     | SOCS5    | NM_014011:c.1571delG;p.R524fs                 | D16     |        |
| chr4  | 5.7E+07 | 5.7E+07 | -           | A    | exonic          | frameshift insertion    | AASDH    | NM_181806:c.1320_1321insT;p.L440fs            | D16     |        |
| chr5  | 3.4E+07 | 3.4E+07 | T           | -    | exonic          | frameshift deletion     | SLC45A2  | NM_001012509:c.915delA;p.S305fs               | D16     |        |
| chr11 | 1.2E+08 | 1.2E+08 | GGGCTGGAGA  | -    | exonic          | nonframeshift deletion  | TMPRSS13 | NM_001077263:c.248_262del;p.83_88del          | D16     |        |
| chr14 | 2.2E+07 | 2.2E+07 | -           | GGC  | exonic          | nonframeshift insertion | RBM23    | NM_001077352:c.1078_1079insGCC;p.Q360delinsAQ | D16     |        |
| chr17 | 1.2E+07 | 1.2E+07 | GAA         | -    | exonic          | nonframeshift deletion  | DNAH9    | NM_004662:c.2079_2081del;p.693_694del         | D16     |        |
| chr19 | 9439669 | 9439669 | T           | -    | exonic          | frameshift deletion     | ZNF560   | NM_152476:c.954delA;p.K318fs                  | D16     |        |
| chr19 | 1.5E+07 | 1.5E+07 | -           | T    | exonic          | frameshift insertion    | OR7C2    | NM_012377:c.303_304insT;p.I101fs              | D16     |        |
| chrX  | 1E+08   | 1E+08   | T           | -    | exonic          | frameshift deletion     | TRMT2B   | NM_001167972:c.196delA;p.S66fs                | D16     |        |
| chrX  | 1.4E+08 | 1.4E+08 | G           | -    | exonic          | frameshift insertion    | SPANXN2  | NM_001009615:c.72_73insA;p.N24fs              | D16     |        |
| chr4  | 1.5E+08 | 1.5E+08 | -           | T    | exonic          | frameshift insertion    | FBXW7    | NM_001013415:c.1440_1441insA;p.N480fs         | D21     |        |
| chr4  | 1.5E+08 | 1.5E+08 | G           | -    | exonic          | frameshift deletion     | FBXW7    | NM_001013415:c.975delC;p.L325fs               | D21     |        |
| chr1  | 7.1E+07 | 7.1E+07 | C           | -    | exonic          | frameshift deletion     | CTH      | NM_001190463:c.1027delC;p.R343fs              | D7      |        |
| chr5  | 1.1E+08 | 1.1E+08 | -           | C    | exonic          | frameshift insertion    | APC      | NM_001127511:c.4062_4063insC;p.P1354fs        | D7      |        |
| chr7  | 1.4E+08 | 1.4E+08 | -           | T    | exonic          | frameshift insertion    | PTN      | NM_002825:c.124_125insA;p.V42fs               | D7      |        |
| chr11 | 1E+08   | 1E+08   | -           | T    | exonic          | frameshift insertion    | MMP10    | NM_002425:c.188_189insA;p.I63fs               | D7      |        |
| chr5  | 1.1E+08 | 1.1E+08 | TCTCCCTCCAA | -    | exonic          | frameshift deletion     | APC      | NM_001127511:c.4024_4037del;p.1342_1346del    | D5      |        |
| chr10 | 2.3E+07 | 2.3E+07 | TTAC        | -    | splicing        |                         | COMMD3   |                                               | D5      |        |
| chr19 | 4.7E+07 | 4.7E+07 | G           | -    | exonic          | frameshift deletion     | CEACAM5  | NM_004363:c.516delG;p.Q172fs                  | D5      |        |
| chr1  | 1.6E+08 | 1.6E+08 | T           | -    | exonic          | frameshift deletion     | AIM2     | NM_004833:c.1027delA;p.T343fs                 | D3      |        |
| chr1  | 2.4E+08 | 2.4E+08 | -           | AA   | exonic          | frameshift insertion    | KMO      | NM_003679:c.1412_1413insAA;p.A471fs           | D3      |        |
| chr2  | 1.5E+08 | 1.5E+08 | T           | -    | exonic;splicing | frameshift deletion     | RBM43    | NM_198557:c.213delA;p.K71fs                   | D3      |        |
| chr3  | 4.6E+07 | 4.6E+07 | A           | -    | exonic          | frameshift deletion     | CCR3     | NM_178329:c.694delA;p.K232fs                  | D3      |        |
| chr3  | 1.3E+08 | 1.3E+08 | -           | A    | exonic          | stopgain SNV            | CCDC48   | NM_024768:c.1318_1319insA;p.Y440_F441delinsX  | D3      |        |
| chr3  | 1.4E+08 | 1.4E+08 | A           | -    | exonic          | stopgain SNV            | XRN1     | NM_001042604:c.2012delT;p.L671X               | D3      |        |
| chr3  | 1.5E+08 | 1.5E+08 | -           | T    | exonic          | frameshift insertion    | IGSF10   | NM_178822:c.1598_1599insA;p.S533fs            | D3      |        |
| chr3  | 1.7E+08 | 1.7E+08 | -           | T    | exonic          | frameshift insertion    | EIF5A2   | NM_020390:c.119_120insA;p.I40fs               | D3      |        |

|       |         |         |              |          |          |                         |          |                                                            |     |
|-------|---------|---------|--------------|----------|----------|-------------------------|----------|------------------------------------------------------------|-----|
| chr8  | 1.3E+08 | 1.3E+08 | A            | -        | exonic   | frameshift deletion     | TG       | NM_003235:c.6051delA:p.L2017fs                             | D3  |
| chr11 | 3.3E+07 | 3.3E+07 | A            | -        | exonic   | frameshift deletion     | CSTF3    | NM_001326:c.960delT:p.F320fs                               | D3  |
| chr12 | 1.4E+07 | 1.4E+07 | -            | T        | exonic   | frameshift insertion    | GRIN2B   | NM_000834:c.1366_1367insA:p.C456fs                         | D3  |
| chr12 | 9E+07   | 9E+07   | TCTTCTCCTC/- | -        | exonic   | nonframeshift deletion  | C12orf12 | NM_152638:c.939_959del:p.313_320del                        | D3  |
| chr17 | 7190325 | 7190327 | AGA          | -        | exonic   | nonframeshift deletion  | ACAP1    | NM_014716:c.893_895del:p.298_299del                        | D3  |
| chr22 | 2.8E+07 | 2.8E+07 | AACGAA       | -        | exonic   | nonframeshift deletion  | NEFH     | NM_021076:c.1923_1928del:p.641_643del                      | D3  |
| chrX  | 1.4E+08 | 1.4E+08 | G            | -        | exonic   | frameshift deletion     | MCF2     | NM_001171877:c.19delC;p.R7fs                               | D3  |
| chr1  | 1.5E+08 | 1.5E+08 | TG           | -        | exonic   | frameshift deletion     | BCL9     | NM_004326:c.3093_3094del:p.1031_1032del                    | D10 |
| chr3  | 1.6E+08 | 1.6E+08 | -            | A        | exonic   | frameshift insertion    | SMC4     | NM_005496:c.2556_2557insA:p.D852fs                         | D10 |
| chr6  | 1E+08   | 1E+08   | A            | -        | exonic   | frameshift deletion     | MCHR2    | NM_001040179:c.623delT:p.F208fs                            | D10 |
| chr1  | 1.1E+07 | 1.1E+07 | -            | TAGAGAA( | exonic   | stopgain SNV            | CASZ1    | NM_001079843:c.3448_3449insCTTCTCTA:p.E1150_N1151delinsLL) | D8  |
| chr2  | 1.5E+08 | 1.5E+08 | -            | A        | exonic   | frameshift insertion    | ACVR2A   | NM_001616:c.1302_1303insA:p.H434fs                         | D8  |
| chr4  | 8.2E+07 | 8.2E+07 | A            | -        | exonic   | frameshift deletion     | C4orf22  | NM_152770:c.441delA:p.G147fs                               | D8  |
| chr5  | 1.1E+08 | 1.1E+08 | -            | T        | exonic   | frameshift insertion    | APC      | NM_001127511:c.2921_2922insT:p.S974fs                      | D8  |
| chr5  | 1.1E+08 | 1.1E+08 | A            | -        | exonic   | frameshift deletion     | APC      | NM_001127511:c.4281delA:p.T1427fs                          | D8  |
| chr7  | 1.1E+08 | 1.1E+08 | -            | A        | splicing |                         | COG5     |                                                            | D8  |
| chr9  | 6244555 | 6244555 | -            | A        | splicing |                         | IL33     |                                                            | D8  |
| chrX  | 8.3E+07 | 8.3E+07 | -            | A        | exonic   | frameshift insertion    | CYLC1    | NM_021118:c.1264_1265insA:p.E422fs                         | D8  |
| chr4  | 4.7E+07 | 4.7E+07 | AG           | -        | exonic   | frameshift deletion     | ATP10D   | NM_020453:c.2760_2761del:p.920_921del                      | D9  |
| chr5  | 1.1E+08 | 1.1E+08 | A            | -        | exonic   | frameshift deletion     | APC      | NM_001127511:c.2559delA:p.G853fs                           | D9  |
| chr4  | 1.8E+08 | 1.8E+08 | G            | -        | exonic   | frameshift deletion     | ADAM29   | NM_001130705:c.219delG:p.L73fs                             | D6  |
| chr7  | 8.7E+07 | 8.7E+07 | -            | A        | exonic   | frameshift insertion    | ABCB4    | NM_000443:c.1016_1017insT:p.S339fs                         | D6  |
| chr9  | 7.7E+07 | 7.7E+07 | T            | -        | exonic   | frameshift deletion     | TRPM6    | NM_001177310:c.3126delA:p.P1042fs                          | D6  |
| chr3  | 1.2E+08 | 1.2E+08 | -            | G        | splicing |                         | MYLK     |                                                            | D2  |
| chr22 | 3.5E+07 | 3.5E+07 | T            | -        | exonic   | frameshift deletion     | APOL1    | NM_001136541:c.560delT:p.L187fs                            | D2  |
| chr5  | 1.1E+08 | 1.1E+08 | AG           | -        | exonic   | frameshift deletion     | APC      | NM_001127511:c.4163_4164del:p.1388_1388del                 | D12 |
| chr12 | 5.5E+07 | 5.5E+07 | AAGG         | -        | exonic   | frameshift deletion     | MYL6     | NM_021019:c.292_295del:p.98_99del                          | D12 |
| chr16 | 2.5E+07 | 2.5E+07 | A            | -        | exonic   | frameshift deletion     | TNRC6A   | NM_014494:c.3723delA:p.I1241fs                             | D12 |
| chr17 | 2.7E+07 | 2.7E+07 | C            | -        | exonic   | frameshift deletion     | NF1      | NM_000267:c.2027delC:p.T676fs                              | D12 |
| chr9  | 1.3E+08 | 1.3E+08 | CCT          | -        | exonic   | nonframeshift deletion  | GOLGA2   | NM_004486:c.2144_2146del:p.715_716del                      | D18 |
| chr10 | 7.9E+07 | 7.9E+07 | -            | C        | exonic   | frameshift insertion    | DLG5     | NM_004747:c.5346_5347insG:p.G1782fs                        | D18 |
| chr11 | 1.5E+07 | 1.5E+07 | CACCACAGAGT- | -        | exonic   | nonframeshift deletion  | INSC     | NM_001031853:c.759_770del:p.253_257del                     | D18 |
| chr19 | 6E+07   | 6E+07   | C            | -        | exonic   | stopgain SNV            | PTPRH    | NM_001161440:c.951delG:p.W317X                             | D18 |
| chr2  | 5.4E+07 | 5.4E+07 | -            | G        | splicing |                         | PSME4    |                                                            | D14 |
| chr11 | 1.2E+08 | 1.2E+08 | GGGCTGGAGA1- | -        | exonic   | nonframeshift deletion  | TMPRSS13 | NM_001077263:c.248_262del:p.83_88del                       | D14 |
| chr1  | 8.9E+07 | 8.9E+07 | T            | -        | exonic   | frameshift deletion     | GBP2     | NM_004120:c.1532delA:p.N511fs                              | D20 |
| chr3  | 7596012 | 7596012 | -            | T        | exonic   | frameshift insertion    | GRM7     | NM_000844:c.2419_2420insT:p.I807fs                         | D20 |
| chr14 | 2E+07   | 2E+07   | -            | T        | exonic   | frameshift insertion    | RNASE9   | NM_001001673:c.273_274insA:p.N91fs                         | D20 |
| chr15 | 3.9E+07 | 3.9E+07 | -            | AA       | exonic   | frameshift insertion    | SPINT1   | NM_001032367:c.1427_1428insAA:p.R476fs                     | D20 |
| chr16 | 2.4E+07 | 2.4E+07 | -            | T        | exonic   | frameshift insertion    | PALB2    | NM_024675:c.840_841insA:p.N280fs                           | D20 |
| chr19 | 5.1E+07 | 5.1E+07 | -            | CTCCTCG( | exonic   | nonframeshift insertion | RSPH6A   | NM_030785:c.2143_2144insGAGGAGGGCGAGGAG;p.T715deli         | D20 |
