# Supplementary material for: Novel recurrently mutated genes and a prognostic mutation signature in colorectal cancer
Source: HighWire-hosted journal article supplement (doi:10.1136/gutjnl-2013-306620), 2014-06-20
Supplement: gutjnl-2013-306620supp_tableS4.pdf [file gutjnl-2013-306620supp_tableS4.pdf]

**Table S4.** Frequencies of mutated genes in 22 colorectal cancer patients identified by exome sequencing.

| Gene     | missense | nonsense | splicing | frameshift_indel | nonframeshift_indel | mutated_sample_num | total_sample_num | mutation_frequency |
|----------|----------|----------|----------|------------------|---------------------|--------------------|------------------|--------------------|
| APC      | 0        | 19       | 0        | 8                | 0                   | 18                 | 22               | 0.818181818        |
| TP53     | 7        | 2        | 0        | 0                | 0                   | 9                  | 22               | 0.409090909        |
| KRAS     | 6        | 0        | 0        | 0                | 0                   | 6                  | 22               | 0.272727273        |
| FBXW7    | 2        | 2        | 0        | 2                | 0                   | 3                  | 22               | 0.136363636        |
| TRIO     | 2        | 0        | 1        | 0                | 0                   | 3                  | 22               | 0.136363636        |
| USH2A    | 3        | 0        | 0        | 0                | 0                   | 3                  | 22               | 0.136363636        |
| GOLGA2   | 0        | 0        | 0        | 0                | 3                   | 3                  | 22               | 0.136363636        |
| FAT4     | 3        | 0        | 0        | 0                | 0                   | 3                  | 22               | 0.136363636        |
| SYNE1    | 2        | 0        | 0        | 0                | 0                   | 2                  | 22               | 0.090909091        |
| MUC16    | 2        | 0        | 0        | 0                | 0                   | 2                  | 22               | 0.090909091        |
| NF1      | 1        | 0        | 0        | 1                | 0                   | 2                  | 22               | 0.090909091        |
| HMCN1    | 2        | 0        | 0        | 0                | 0                   | 2                  | 22               | 0.090909091        |
| ERLIN1   | 2        | 0        | 0        | 0                | 0                   | 2                  | 22               | 0.090909091        |
| SMC4     | 1        | 0        | 0        | 1                | 0                   | 2                  | 22               | 0.090909091        |
| PDE10A   | 2        | 0        | 0        | 0                | 0                   | 2                  | 22               | 0.090909091        |
| LRRC7    | 2        | 0        | 0        | 0                | 0                   | 2                  | 22               | 0.090909091        |
| PRICKLE1 | 2        | 0        | 0        | 0                | 0                   | 2                  | 22               | 0.090909091        |
| PRPF8    | 2        | 0        | 0        | 0                | 0                   | 2                  | 22               | 0.090909091        |
| ASB3     | 0        | 1        | 1        | 0                | 0                   | 2                  | 22               | 0.090909091        |
| CDH9     | 1        | 0        | 1        | 0                | 0                   | 2                  | 22               | 0.090909091        |
| MTMR8    | 0        | 2        | 0        | 0                | 0                   | 2                  | 22               | 0.090909091        |
| DPP10    | 2        | 0        | 0        | 0                | 0                   | 2                  | 22               | 0.090909091        |
| AASDH    | 0        | 0        | 0        | 2                | 0                   | 2                  | 22               | 0.090909091        |
| DDX58    | 2        | 0        | 0        | 0                | 0                   | 2                  | 22               | 0.090909091        |
| CEACAM5  | 0        | 0        | 1        | 1                | 0                   | 2                  | 22               | 0.090909091        |
| GPR161   | 2        | 0        | 0        | 0                | 0                   | 2                  | 22               | 0.090909091        |
| ASTN1    | 2        | 0        | 0        | 0                | 0                   | 2                  | 22               | 0.090909091        |
| DNAH9    | 1        | 0        | 0        | 0                | 1                   | 2                  | 22               | 0.090909091        |
| CSMD2    | 2        | 0        | 0        | 0                | 0                   | 2                  | 22               | 0.090909091        |
| AIM2     | 1        | 0        | 0        | 1                | 0                   | 2                  | 22               | 0.090909091        |
| NLRP13   | 2        | 1        | 0        | 0                | 0                   | 2                  | 22               | 0.090909091        |
| ACADL    | 1        | 1        | 0        | 0                | 0                   | 2                  | 22               | 0.090909091        |
| RSPO2    | 2        | 0        | 0        | 0                | 0                   | 2                  | 22               | 0.090909091        |
| DOCK2    | 2        | 0        | 0        | 0                | 0                   | 2                  | 22               | 0.090909091        |
| BICC1    | 2        | 0        | 0        | 0                | 0                   | 2                  | 22               | 0.090909091        |
| HERC2    | 2        | 0        | 0        | 0                | 0                   | 2                  | 22               | 0.090909091        |
| MAGEC1   | 2        | 0        | 0        | 0                | 0                   | 2                  | 22               | 0.090909091        |

|          |   |   |   |   |   |   |    |             |
|----------|---|---|---|---|---|---|----|-------------|
| CCR3     | 1 | 0 | 0 | 1 | 0 | 2 | 22 | 0.090909091 |
| ANAPC4   | 2 | 0 | 0 | 0 | 0 | 2 | 22 | 0.090909091 |
| LRP2     | 2 | 0 | 0 | 0 | 0 | 2 | 22 | 0.090909091 |
| LRRC27   | 2 | 0 | 0 | 0 | 0 | 2 | 22 | 0.090909091 |
| DNAH10   | 2 | 0 | 0 | 0 | 0 | 2 | 22 | 0.090909091 |
| ATP2B2   | 2 | 0 | 0 | 0 | 0 | 2 | 22 | 0.090909091 |
| IGSF10   | 2 | 0 | 0 | 1 | 0 | 2 | 22 | 0.090909091 |
| PSG9     | 2 | 0 | 0 | 0 | 0 | 2 | 22 | 0.090909091 |
| TMPRSS13 | 0 | 0 | 0 | 0 | 2 | 2 | 22 | 0.090909091 |
| GLIPR1L1 | 2 | 0 | 0 | 0 | 0 | 2 | 22 | 0.090909091 |
| SGCZ     | 2 | 0 | 0 | 0 | 0 | 2 | 22 | 0.090909091 |
| FGF13    | 1 | 1 | 0 | 0 | 0 | 2 | 22 | 0.090909091 |
| ZNF133   | 2 | 0 | 0 | 0 | 0 | 2 | 22 | 0.090909091 |
| VCAN     | 2 | 0 | 0 | 0 | 0 | 2 | 22 | 0.090909091 |
| ANKRD26  | 2 | 0 | 0 | 0 | 0 | 2 | 22 | 0.090909091 |
| HIST1H4B | 1 | 0 | 0 | 0 | 0 | 1 | 22 | 0.045454545 |
| HMG5     | 1 | 0 | 0 | 0 | 0 | 1 | 22 | 0.045454545 |
| CPO      | 1 | 0 | 0 | 0 | 0 | 1 | 22 | 0.045454545 |
| PCSK2    | 1 | 0 | 0 | 0 | 0 | 1 | 22 | 0.045454545 |
| INVS     | 1 | 0 | 0 | 0 | 0 | 1 | 22 | 0.045454545 |
| CPAMD8   | 1 | 0 | 0 | 0 | 0 | 1 | 22 | 0.045454545 |
| LAPTM5   | 1 | 0 | 0 | 0 | 0 | 1 | 22 | 0.045454545 |
| CCDC147  | 1 | 0 | 0 | 0 | 0 | 1 | 22 | 0.045454545 |
| FKBP7    | 1 | 0 | 0 | 0 | 0 | 1 | 22 | 0.045454545 |
| OR2L2    | 1 | 0 | 0 | 0 | 0 | 1 | 22 | 0.045454545 |
| LIFR     | 1 | 0 | 0 | 0 | 0 | 1 | 22 | 0.045454545 |
| ASS1     | 1 | 0 | 0 | 0 | 0 | 1 | 22 | 0.045454545 |
| OR2L8    | 1 | 0 | 0 | 0 | 0 | 1 | 22 | 0.045454545 |
| SEMA4G   | 1 | 0 | 0 | 0 | 0 | 1 | 22 | 0.045454545 |
| SMG6     | 1 | 0 | 0 | 0 | 0 | 1 | 22 | 0.045454545 |
| DLG5     | 0 | 0 | 0 | 1 | 0 | 1 | 22 | 0.045454545 |
| CASS4    | 1 | 0 | 0 | 0 | 0 | 1 | 22 | 0.045454545 |
| C11orf35 | 1 | 0 | 0 | 0 | 0 | 1 | 22 | 0.045454545 |
| COMMD3   | 0 | 0 | 1 | 0 | 0 | 1 | 22 | 0.045454545 |
| SPR      | 0 | 0 | 0 | 1 | 0 | 1 | 22 | 0.045454545 |
| ALMS1    | 0 | 1 | 0 | 0 | 0 | 1 | 22 | 0.045454545 |
| LRRTM1   | 1 | 0 | 0 | 0 | 0 | 1 | 22 | 0.045454545 |
| IRAK1    | 1 | 0 | 0 | 0 | 0 | 1 | 22 | 0.045454545 |
| IFNA16   | 1 | 0 | 0 | 0 | 0 | 1 | 22 | 0.045454545 |
| GRIN3A   | 1 | 0 | 0 | 0 | 0 | 1 | 22 | 0.045454545 |
| WDR7     | 1 | 0 | 0 | 0 | 0 | 1 | 22 | 0.045454545 |
| FAM59A   | 1 | 0 | 0 | 0 | 0 | 1 | 22 | 0.045454545 |

|          |   |   |   |   |   |   |    |             |
|----------|---|---|---|---|---|---|----|-------------|
| SLITRK4  | 1 | 0 | 0 | 0 | 0 | 1 | 22 | 0.045454545 |
| SLITRK5  | 1 | 0 | 0 | 0 | 0 | 1 | 22 | 0.045454545 |
| DIAPH3   | 1 | 0 | 0 | 0 | 0 | 1 | 22 | 0.045454545 |
| FAM120C  | 1 | 0 | 0 | 0 | 0 | 1 | 22 | 0.045454545 |
| SLC45A2  | 0 | 0 | 0 | 1 | 0 | 1 | 22 | 0.045454545 |
| ABLIM3   | 1 | 0 | 0 | 0 | 0 | 1 | 22 | 0.045454545 |
| NMS      | 1 | 0 | 0 | 0 | 0 | 1 | 22 | 0.045454545 |
| GPR39    | 1 | 0 | 0 | 0 | 0 | 1 | 22 | 0.045454545 |
| ZNF670   | 1 | 0 | 0 | 0 | 0 | 1 | 22 | 0.045454545 |
| HCN1     | 1 | 0 | 0 | 0 | 0 | 1 | 22 | 0.045454545 |
| PARP12   | 1 | 0 | 0 | 0 | 0 | 1 | 22 | 0.045454545 |
| AKAP9    | 1 | 0 | 0 | 0 | 0 | 1 | 22 | 0.045454545 |
| FDXACB1  | 1 | 0 | 0 | 0 | 0 | 1 | 22 | 0.045454545 |
| STARD8   | 0 | 1 | 0 | 0 | 0 | 1 | 22 | 0.045454545 |
| C7orf51  | 1 | 0 | 0 | 0 | 0 | 1 | 22 | 0.045454545 |
| EIF5A2   | 0 | 0 | 0 | 1 | 0 | 1 | 22 | 0.045454545 |
| GPR112   | 1 | 0 | 0 | 0 | 0 | 1 | 22 | 0.045454545 |
| STARD5   | 1 | 0 | 0 | 0 | 0 | 1 | 22 | 0.045454545 |
| HSD17B10 | 1 | 0 | 0 | 0 | 0 | 1 | 22 | 0.045454545 |
| GPR158   | 1 | 0 | 0 | 0 | 0 | 1 | 22 | 0.045454545 |
| MMP10    | 0 | 0 | 0 | 1 | 0 | 1 | 22 | 0.045454545 |
| DTL      | 1 | 0 | 0 | 0 | 0 | 1 | 22 | 0.045454545 |
| DSTYK    | 1 | 0 | 0 | 0 | 0 | 1 | 22 | 0.045454545 |
| ITGA1    | 1 | 0 | 0 | 0 | 0 | 1 | 22 | 0.045454545 |
| CAPRIN1  | 0 | 1 | 0 | 0 | 0 | 1 | 22 | 0.045454545 |
| MX1      | 1 | 0 | 0 | 0 | 0 | 1 | 22 | 0.045454545 |
| CYP2C9   | 1 | 0 | 0 | 0 | 0 | 1 | 22 | 0.045454545 |
| GTF3C1   | 1 | 0 | 0 | 0 | 0 | 1 | 22 | 0.045454545 |
| GTF3C5   | 1 | 0 | 0 | 0 | 0 | 1 | 22 | 0.045454545 |
| DENND4C  | 1 | 0 | 0 | 0 | 0 | 1 | 22 | 0.045454545 |
| OR2W3    | 1 | 0 | 0 | 0 | 0 | 1 | 22 | 0.045454545 |
| TMEM132D | 1 | 0 | 0 | 0 | 0 | 1 | 22 | 0.045454545 |
| OR5D14   | 1 | 0 | 0 | 0 | 0 | 1 | 22 | 0.045454545 |
| OR5D16   | 1 | 0 | 0 | 0 | 0 | 1 | 22 | 0.045454545 |
| XPO1     | 1 | 0 | 0 | 0 | 0 | 1 | 22 | 0.045454545 |
| APOB     | 1 | 0 | 0 | 0 | 0 | 1 | 22 | 0.045454545 |
| LILRB2   | 1 | 0 | 0 | 0 | 0 | 1 | 22 | 0.045454545 |
| RWDD2B   | 1 | 0 | 0 | 0 | 0 | 1 | 22 | 0.045454545 |
| WDR49    | 1 | 0 | 0 | 0 | 0 | 1 | 22 | 0.045454545 |
| SPG11    | 0 | 1 | 0 | 0 | 0 | 1 | 22 | 0.045454545 |
| MST1     | 1 | 0 | 0 | 0 | 0 | 1 | 22 | 0.045454545 |
| L3MBTL4  | 0 | 1 | 0 | 0 | 0 | 1 | 22 | 0.045454545 |

|          |   |   |   |   |   |   |    |             |
|----------|---|---|---|---|---|---|----|-------------|
| LSR      | 1 | 0 | 0 | 0 | 0 | 1 | 22 | 0.045454545 |
| TTN      | 1 | 0 | 0 | 0 | 0 | 1 | 22 | 0.045454545 |
| VSX2     | 1 | 0 | 0 | 0 | 0 | 1 | 22 | 0.045454545 |
| GRM4     | 1 | 0 | 0 | 0 | 0 | 1 | 22 | 0.045454545 |
| JAGN1    | 1 | 0 | 0 | 0 | 0 | 1 | 22 | 0.045454545 |
| GRM7     | 0 | 0 | 0 | 1 | 0 | 1 | 22 | 0.045454545 |
| GRM1     | 1 | 0 | 0 | 0 | 0 | 1 | 22 | 0.045454545 |
| SDK1     | 1 | 0 | 0 | 0 | 0 | 1 | 22 | 0.045454545 |
| ALPK3    | 1 | 0 | 0 | 0 | 0 | 1 | 22 | 0.045454545 |
| KIF6     | 1 | 0 | 0 | 0 | 0 | 1 | 22 | 0.045454545 |
| KCNQ5    | 1 | 0 | 0 | 0 | 0 | 1 | 22 | 0.045454545 |
| GTF2IRD1 | 1 | 0 | 0 | 0 | 0 | 1 | 22 | 0.045454545 |
| CUX2     | 1 | 0 | 0 | 0 | 0 | 1 | 22 | 0.045454545 |
| GPAM     | 1 | 0 | 0 | 0 | 0 | 1 | 22 | 0.045454545 |
| FSIP2    | 1 | 0 | 0 | 0 | 0 | 1 | 22 | 0.045454545 |
| ZEB2     | 1 | 0 | 0 | 0 | 0 | 1 | 22 | 0.045454545 |
| KCNH5    | 1 | 0 | 0 | 0 | 0 | 1 | 22 | 0.045454545 |
| KCNH7    | 0 | 0 | 0 | 1 | 0 | 1 | 22 | 0.045454545 |
| KCNH3    | 1 | 0 | 0 | 0 | 0 | 1 | 22 | 0.045454545 |
| ZNF823   | 1 | 0 | 0 | 0 | 0 | 1 | 22 | 0.045454545 |
| SH3D19   | 0 | 1 | 0 | 0 | 0 | 1 | 22 | 0.045454545 |
| CABP5    | 1 | 0 | 0 | 0 | 0 | 1 | 22 | 0.045454545 |
| CDC73    | 1 | 0 | 0 | 0 | 0 | 1 | 22 | 0.045454545 |
| MAGOHB   | 1 | 0 | 0 | 0 | 0 | 1 | 22 | 0.045454545 |
| KCNH8    | 0 | 0 | 0 | 0 | 1 | 1 | 22 | 0.045454545 |
| CBL      | 1 | 0 | 0 | 0 | 0 | 1 | 22 | 0.045454545 |
| C10orf68 | 1 | 0 | 0 | 0 | 0 | 1 | 22 | 0.045454545 |
| KRT17    | 1 | 0 | 0 | 0 | 0 | 1 | 22 | 0.045454545 |
| AKAP8    | 1 | 0 | 0 | 0 | 0 | 1 | 22 | 0.045454545 |
| SLC35B3  | 0 | 0 | 1 | 0 | 0 | 1 | 22 | 0.045454545 |
| WDFY3    | 1 | 0 | 0 | 0 | 0 | 1 | 22 | 0.045454545 |
| FBXO31   | 1 | 0 | 0 | 0 | 0 | 1 | 22 | 0.045454545 |
| UTP20    | 1 | 0 | 0 | 0 | 0 | 1 | 22 | 0.045454545 |
| MYBBP1A  | 1 | 0 | 0 | 0 | 0 | 1 | 22 | 0.045454545 |
| GOSR2    | 1 | 0 | 0 | 0 | 0 | 1 | 22 | 0.045454545 |
| VWF      | 1 | 0 | 0 | 0 | 0 | 1 | 22 | 0.045454545 |
| GOSR1    | 1 | 0 | 0 | 0 | 0 | 1 | 22 | 0.045454545 |
| ZNF292   | 1 | 0 | 0 | 0 | 0 | 1 | 22 | 0.045454545 |
| SYT4     | 1 | 0 | 0 | 0 | 0 | 1 | 22 | 0.045454545 |
| KLHL26   | 1 | 0 | 0 | 0 | 0 | 1 | 22 | 0.045454545 |
| C12orf29 | 1 | 0 | 0 | 0 | 0 | 1 | 22 | 0.045454545 |
| GPM6A    | 1 | 0 | 0 | 0 | 0 | 1 | 22 | 0.045454545 |

|          |   |   |   |   |   |   |    |             |
|----------|---|---|---|---|---|---|----|-------------|
| SMAD4    | 1 | 0 | 0 | 0 | 0 | 1 | 22 | 0.045454545 |
| SLC2A14  | 1 | 0 | 0 | 0 | 0 | 1 | 22 | 0.045454545 |
| KLHL28   | 0 | 0 | 1 | 0 | 0 | 1 | 22 | 0.045454545 |
| RET      | 1 | 0 | 0 | 0 | 0 | 1 | 22 | 0.045454545 |
| CAMK4    | 1 | 0 | 0 | 0 | 0 | 1 | 22 | 0.045454545 |
| SPTA1    | 1 | 0 | 0 | 0 | 0 | 1 | 22 | 0.045454545 |
| CDH12    | 0 | 1 | 0 | 0 | 0 | 1 | 22 | 0.045454545 |
| TRIM59   | 1 | 0 | 0 | 0 | 0 | 1 | 22 | 0.045454545 |
| PLP1     | 1 | 0 | 0 | 0 | 0 | 1 | 22 | 0.045454545 |
| CLCA1    | 1 | 0 | 0 | 0 | 0 | 1 | 22 | 0.045454545 |
| CTH      | 0 | 0 | 0 | 1 | 0 | 1 | 22 | 0.045454545 |
| CLCA4    | 1 | 0 | 0 | 0 | 0 | 1 | 22 | 0.045454545 |
| SCLT1    | 0 | 0 | 1 | 0 | 0 | 1 | 22 | 0.045454545 |
| NCOA4    | 1 | 0 | 0 | 0 | 0 | 1 | 22 | 0.045454545 |
| C12orf59 | 1 | 0 | 0 | 0 | 0 | 1 | 22 | 0.045454545 |
| SMC5     | 1 | 0 | 0 | 0 | 0 | 1 | 22 | 0.045454545 |
| RBM12    | 0 | 1 | 0 | 0 | 0 | 1 | 22 | 0.045454545 |
| C2orf15  | 1 | 0 | 0 | 0 | 0 | 1 | 22 | 0.045454545 |
| TM9SF2   | 1 | 0 | 0 | 0 | 0 | 1 | 22 | 0.045454545 |
| S100A4   | 1 | 0 | 0 | 0 | 0 | 1 | 22 | 0.045454545 |
| C2orf18  | 1 | 0 | 0 | 0 | 0 | 1 | 22 | 0.045454545 |
| MAGI2    | 1 | 0 | 0 | 0 | 0 | 1 | 22 | 0.045454545 |
| SLC25A40 | 1 | 0 | 0 | 0 | 0 | 1 | 22 | 0.045454545 |
| LAMA2    | 1 | 0 | 0 | 0 | 0 | 1 | 22 | 0.045454545 |
| GRID1    | 1 | 0 | 0 | 0 | 0 | 1 | 22 | 0.045454545 |
| ZNF83    | 0 | 0 | 0 | 1 | 0 | 1 | 22 | 0.045454545 |
| OR6K2    | 1 | 0 | 0 | 0 | 0 | 1 | 22 | 0.045454545 |
| PPEF2    | 1 | 0 | 0 | 0 | 0 | 1 | 22 | 0.045454545 |
| LEPR     | 1 | 0 | 0 | 0 | 0 | 1 | 22 | 0.045454545 |
| SS18     | 1 | 0 | 0 | 0 | 0 | 1 | 22 | 0.045454545 |
| MBNL1    | 1 | 0 | 0 | 0 | 0 | 1 | 22 | 0.045454545 |
| ALG12    | 1 | 0 | 0 | 0 | 0 | 1 | 22 | 0.045454545 |
| TMEM63A  | 1 | 0 | 0 | 0 | 0 | 1 | 22 | 0.045454545 |
| KIAA2022 | 1 | 0 | 0 | 0 | 0 | 1 | 22 | 0.045454545 |
| OR9I1    | 1 | 0 | 0 | 0 | 0 | 1 | 22 | 0.045454545 |
| ZFYVE26  | 1 | 0 | 0 | 0 | 0 | 1 | 22 | 0.045454545 |
| GPR155   | 1 | 0 | 0 | 0 | 0 | 1 | 22 | 0.045454545 |
| APBA2    | 1 | 0 | 0 | 0 | 0 | 1 | 22 | 0.045454545 |
| F8       | 1 | 0 | 0 | 0 | 0 | 1 | 22 | 0.045454545 |
| SUCLA2   | 1 | 0 | 0 | 0 | 0 | 1 | 22 | 0.045454545 |
| TAS2R5   | 1 | 0 | 0 | 0 | 0 | 1 | 22 | 0.045454545 |
| NTN4     | 1 | 0 | 0 | 0 | 0 | 1 | 22 | 0.045454545 |

|           |   |   |   |   |   |   |    |             |
|-----------|---|---|---|---|---|---|----|-------------|
| CCDC113   | 1 | 0 | 0 | 0 | 0 | 1 | 22 | 0.045454545 |
| SSTR1     | 1 | 0 | 0 | 0 | 0 | 1 | 22 | 0.045454545 |
| ABCA4     | 1 | 0 | 0 | 0 | 0 | 1 | 22 | 0.045454545 |
| ATP1A4    | 1 | 0 | 0 | 0 | 0 | 1 | 22 | 0.045454545 |
| SSTR4     | 1 | 0 | 0 | 0 | 0 | 1 | 22 | 0.045454545 |
| ABCA1     | 1 | 0 | 0 | 0 | 0 | 1 | 22 | 0.045454545 |
| CDK5RAP2  | 1 | 0 | 0 | 0 | 0 | 1 | 22 | 0.045454545 |
| KIF4A     | 1 | 0 | 0 | 0 | 0 | 1 | 22 | 0.045454545 |
| TUBGCP5   | 1 | 0 | 0 | 0 | 0 | 1 | 22 | 0.045454545 |
| ATP11B    | 0 | 1 | 0 | 0 | 0 | 1 | 22 | 0.045454545 |
| ERC1      | 1 | 0 | 0 | 0 | 0 | 1 | 22 | 0.045454545 |
| PTPRZ1    | 1 | 0 | 0 | 0 | 0 | 1 | 22 | 0.045454545 |
| CTNNB1    | 1 | 0 | 0 | 0 | 0 | 1 | 22 | 0.045454545 |
| ZNF14     | 1 | 0 | 0 | 0 | 0 | 1 | 22 | 0.045454545 |
| ZNF493    | 1 | 0 | 0 | 0 | 0 | 1 | 22 | 0.045454545 |
| PGLYRP4   | 0 | 0 | 0 | 1 | 0 | 1 | 22 | 0.045454545 |
| MYOC      | 1 | 0 | 0 | 0 | 0 | 1 | 22 | 0.045454545 |
| C10orf81  | 1 | 0 | 0 | 0 | 0 | 1 | 22 | 0.045454545 |
| GYG1      | 1 | 0 | 0 | 0 | 0 | 1 | 22 | 0.045454545 |
| OR8A1     | 1 | 0 | 0 | 0 | 0 | 1 | 22 | 0.045454545 |
| OIP5      | 1 | 0 | 0 | 0 | 0 | 1 | 22 | 0.045454545 |
| RGS22     | 1 | 0 | 0 | 0 | 0 | 1 | 22 | 0.045454545 |
| IMPG2     | 1 | 0 | 0 | 0 | 0 | 1 | 22 | 0.045454545 |
| PDE1C     | 1 | 0 | 0 | 0 | 0 | 1 | 22 | 0.045454545 |
| SULF1     | 1 | 0 | 0 | 0 | 0 | 1 | 22 | 0.045454545 |
| C20orf114 | 1 | 0 | 0 | 0 | 0 | 1 | 22 | 0.045454545 |
| HNF1B     | 1 | 0 | 0 | 0 | 0 | 1 | 22 | 0.045454545 |
| CERKL     | 1 | 0 | 0 | 0 | 0 | 1 | 22 | 0.045454545 |
| MTTP      | 1 | 0 | 0 | 0 | 0 | 1 | 22 | 0.045454545 |
| KLF3      | 1 | 0 | 0 | 0 | 0 | 1 | 22 | 0.045454545 |
| VWCE      | 1 | 0 | 0 | 0 | 0 | 1 | 22 | 0.045454545 |
| LRRIQ1    | 1 | 0 | 0 | 0 | 0 | 1 | 22 | 0.045454545 |
| PSMC2     | 1 | 0 | 0 | 0 | 0 | 1 | 22 | 0.045454545 |
| JAG1      | 0 | 0 | 1 | 0 | 0 | 1 | 22 | 0.045454545 |
| HSD17B4   | 0 | 1 | 0 | 0 | 0 | 1 | 22 | 0.045454545 |
| POTEB     | 1 | 0 | 0 | 0 | 0 | 1 | 22 | 0.045454545 |
| PSMC6     | 0 | 0 | 0 | 1 | 0 | 1 | 22 | 0.045454545 |
| HECW1     | 1 | 0 | 0 | 0 | 0 | 1 | 22 | 0.045454545 |
| ITIH5L    | 1 | 0 | 0 | 0 | 0 | 1 | 22 | 0.045454545 |
| ITGB4     | 1 | 0 | 0 | 0 | 0 | 1 | 22 | 0.045454545 |
| CD44      | 1 | 0 | 0 | 0 | 0 | 1 | 22 | 0.045454545 |
| PCDH15    | 1 | 0 | 0 | 0 | 0 | 1 | 22 | 0.045454545 |

|          |   |   |   |   |   |   |    |             |
|----------|---|---|---|---|---|---|----|-------------|
| SLC24A2  | 1 | 0 | 0 | 0 | 0 | 1 | 22 | 0.045454545 |
| HEATR8   | 1 | 0 | 0 | 0 | 0 | 1 | 22 | 0.045454545 |
| IL33     | 0 | 0 | 1 | 0 | 0 | 1 | 22 | 0.045454545 |
| ACSM1    | 1 | 0 | 0 | 0 | 0 | 1 | 22 | 0.045454545 |
| HGF      | 0 | 1 | 0 | 0 | 0 | 1 | 22 | 0.045454545 |
| ATP8B3   | 1 | 0 | 0 | 0 | 0 | 1 | 22 | 0.045454545 |
| NBN      | 1 | 0 | 0 | 0 | 0 | 1 | 22 | 0.045454545 |
| DMXL2    | 1 | 0 | 0 | 0 | 0 | 1 | 22 | 0.045454545 |
| SCGBL    | 1 | 0 | 0 | 0 | 0 | 1 | 22 | 0.045454545 |
| RAB25    | 1 | 0 | 0 | 0 | 0 | 1 | 22 | 0.045454545 |
| CFH      | 1 | 0 | 0 | 0 | 0 | 1 | 22 | 0.045454545 |
| BNC2     | 1 | 0 | 0 | 0 | 0 | 1 | 22 | 0.045454545 |
| GLRA2    | 1 | 0 | 0 | 0 | 0 | 1 | 22 | 0.045454545 |
| OLFM2    | 1 | 0 | 0 | 0 | 0 | 1 | 22 | 0.045454545 |
| ARMCX1   | 1 | 0 | 0 | 0 | 0 | 1 | 22 | 0.045454545 |
| E2F8     | 1 | 0 | 0 | 0 | 0 | 1 | 22 | 0.045454545 |
| ITLN1    | 1 | 0 | 0 | 0 | 0 | 1 | 22 | 0.045454545 |
| ADNP2    | 0 | 1 | 0 | 0 | 0 | 1 | 22 | 0.045454545 |
| MAP3K15  | 1 | 0 | 0 | 0 | 0 | 1 | 22 | 0.045454545 |
| ZNF543   | 0 | 1 | 0 | 0 | 0 | 1 | 22 | 0.045454545 |
| SYBU     | 1 | 0 | 0 | 0 | 0 | 1 | 22 | 0.045454545 |
| SLC1A6   | 1 | 0 | 0 | 0 | 0 | 1 | 22 | 0.045454545 |
| WDR72    | 1 | 0 | 0 | 0 | 0 | 1 | 22 | 0.045454545 |
| FAM126A  | 1 | 0 | 0 | 0 | 0 | 1 | 22 | 0.045454545 |
| SLC1A2   | 1 | 0 | 0 | 0 | 0 | 1 | 22 | 0.045454545 |
| LILRA1   | 0 | 1 | 0 | 0 | 0 | 1 | 22 | 0.045454545 |
| SYTL2    | 1 | 0 | 0 | 0 | 0 | 1 | 22 | 0.045454545 |
| MCF2     | 0 | 0 | 0 | 1 | 0 | 1 | 22 | 0.045454545 |
| RAD18    | 1 | 0 | 0 | 0 | 0 | 1 | 22 | 0.045454545 |
| UPRT     | 0 | 1 | 0 | 0 | 0 | 1 | 22 | 0.045454545 |
| HYLS1    | 1 | 0 | 0 | 0 | 0 | 1 | 22 | 0.045454545 |
| CATSPER1 | 1 | 0 | 0 | 0 | 0 | 1 | 22 | 0.045454545 |
| HPS5     | 1 | 0 | 0 | 0 | 0 | 1 | 22 | 0.045454545 |
| ARAF     | 1 | 0 | 0 | 0 | 0 | 1 | 22 | 0.045454545 |
| TNRC6B   | 1 | 0 | 0 | 0 | 0 | 1 | 22 | 0.045454545 |
| TNRC6A   | 0 | 0 | 0 | 1 | 0 | 1 | 22 | 0.045454545 |
| ARAP3    | 1 | 0 | 0 | 0 | 0 | 1 | 22 | 0.045454545 |
| CLSTN2   | 1 | 0 | 0 | 0 | 0 | 1 | 22 | 0.045454545 |
| ASB2     | 1 | 0 | 0 | 0 | 0 | 1 | 22 | 0.045454545 |
| PGCP     | 1 | 0 | 0 | 0 | 0 | 1 | 22 | 0.045454545 |
| ADAMTS2  | 1 | 0 | 0 | 0 | 0 | 1 | 22 | 0.045454545 |
| ARHGEF7  | 1 | 0 | 0 | 0 | 0 | 1 | 22 | 0.045454545 |

|          |   |   |   |   |   |   |    |             |
|----------|---|---|---|---|---|---|----|-------------|
| ZNF331   | 1 | 0 | 0 | 0 | 0 | 1 | 22 | 0.045454545 |
| CDH8     | 1 | 0 | 0 | 0 | 0 | 1 | 22 | 0.045454545 |
| NAALAD2  | 0 | 0 | 1 | 0 | 0 | 1 | 22 | 0.045454545 |
| RELN     | 1 | 0 | 0 | 0 | 0 | 1 | 22 | 0.045454545 |
| MTMR9    | 1 | 0 | 0 | 0 | 0 | 1 | 22 | 0.045454545 |
| CDH7     | 1 | 0 | 0 | 0 | 0 | 1 | 22 | 0.045454545 |
| C5orf43  | 1 | 0 | 0 | 0 | 0 | 1 | 22 | 0.045454545 |
| C17orf46 | 1 | 0 | 0 | 0 | 0 | 1 | 22 | 0.045454545 |
| MRPL37   | 1 | 0 | 0 | 0 | 0 | 1 | 22 | 0.045454545 |
| NCKIPSD  | 1 | 0 | 0 | 0 | 0 | 1 | 22 | 0.045454545 |
| PLBD1    | 1 | 0 | 0 | 0 | 0 | 1 | 22 | 0.045454545 |
| OR5111   | 1 | 0 | 0 | 0 | 0 | 1 | 22 | 0.045454545 |
| MCHR2    | 0 | 0 | 0 | 1 | 0 | 1 | 22 | 0.045454545 |
| XYLT1    | 0 | 0 | 1 | 0 | 0 | 1 | 22 | 0.045454545 |
| UTP14A   | 0 | 0 | 1 | 0 | 0 | 1 | 22 | 0.045454545 |
| REV3L    | 1 | 0 | 0 | 0 | 0 | 1 | 22 | 0.045454545 |
| KIRREL2  | 1 | 0 | 0 | 0 | 0 | 1 | 22 | 0.045454545 |
| EFHA1    | 1 | 0 | 0 | 0 | 0 | 1 | 22 | 0.045454545 |
| KIFC3    | 1 | 0 | 0 | 0 | 0 | 1 | 22 | 0.045454545 |
| STK17A   | 1 | 0 | 0 | 0 | 0 | 1 | 22 | 0.045454545 |
| SYT9     | 1 | 0 | 0 | 0 | 0 | 1 | 22 | 0.045454545 |
| LRRC4C   | 1 | 0 | 0 | 0 | 0 | 1 | 22 | 0.045454545 |
| ARID1A   | 0 | 0 | 0 | 1 | 0 | 1 | 22 | 0.045454545 |
| NRXN3    | 0 | 0 | 1 | 0 | 0 | 1 | 22 | 0.045454545 |
| ZNF280B  | 1 | 0 | 0 | 0 | 0 | 1 | 22 | 0.045454545 |
| APOL1    | 0 | 0 | 0 | 1 | 0 | 1 | 22 | 0.045454545 |
| LSAMP    | 1 | 0 | 0 | 0 | 0 | 1 | 22 | 0.045454545 |
| GATAD1   | 1 | 0 | 0 | 0 | 0 | 1 | 22 | 0.045454545 |
| WNT7A    | 1 | 0 | 0 | 0 | 0 | 1 | 22 | 0.045454545 |
| TMEM40   | 0 | 0 | 1 | 0 | 0 | 1 | 22 | 0.045454545 |
| FOXP2    | 1 | 0 | 0 | 0 | 0 | 1 | 22 | 0.045454545 |
| FOXP1    | 1 | 0 | 0 | 0 | 0 | 1 | 22 | 0.045454545 |
| TRPC4    | 1 | 0 | 0 | 0 | 0 | 1 | 22 | 0.045454545 |
| ALG3     | 1 | 0 | 0 | 0 | 0 | 1 | 22 | 0.045454545 |
| CNTN3    | 1 | 0 | 0 | 0 | 0 | 1 | 22 | 0.045454545 |
| NOS3     | 1 | 0 | 0 | 0 | 0 | 1 | 22 | 0.045454545 |
| CNTN4    | 1 | 0 | 0 | 0 | 0 | 1 | 22 | 0.045454545 |
| ADAM7    | 1 | 0 | 0 | 0 | 0 | 1 | 22 | 0.045454545 |
| OR4C13   | 1 | 0 | 0 | 0 | 0 | 1 | 22 | 0.045454545 |
| LHCGR    | 0 | 1 | 0 | 0 | 0 | 1 | 22 | 0.045454545 |
| CABIN1   | 1 | 0 | 0 | 0 | 0 | 1 | 22 | 0.045454545 |
| KIAA0802 | 1 | 0 | 0 | 0 | 0 | 1 | 22 | 0.045454545 |



|           |   |   |   |   |   |   |    |             |
|-----------|---|---|---|---|---|---|----|-------------|
| DDX50     | 1 | 0 | 0 | 0 | 0 | 1 | 22 | 0.045454545 |
| EXO1      | 1 | 0 | 0 | 0 | 0 | 1 | 22 | 0.045454545 |
| TIMELESS  | 1 | 0 | 0 | 0 | 0 | 1 | 22 | 0.045454545 |
| PRKG2     | 1 | 0 | 0 | 0 | 0 | 1 | 22 | 0.045454545 |
| TNS3      | 0 | 0 | 0 | 1 | 0 | 1 | 22 | 0.045454545 |
| TNS1      | 1 | 0 | 0 | 0 | 0 | 1 | 22 | 0.045454545 |
| FAM135A   | 1 | 0 | 0 | 0 | 0 | 1 | 22 | 0.045454545 |
| ANGPT4    | 1 | 0 | 0 | 0 | 0 | 1 | 22 | 0.045454545 |
| RAD54L2   | 1 | 0 | 0 | 0 | 0 | 1 | 22 | 0.045454545 |
| GCA       | 1 | 0 | 0 | 0 | 0 | 1 | 22 | 0.045454545 |
| TCF4      | 1 | 0 | 0 | 0 | 0 | 1 | 22 | 0.045454545 |
| RASGEF1A  | 1 | 0 | 0 | 0 | 0 | 1 | 22 | 0.045454545 |
| ZNF180    | 1 | 0 | 0 | 0 | 0 | 1 | 22 | 0.045454545 |
| NPFRR2    | 1 | 0 | 0 | 0 | 0 | 1 | 22 | 0.045454545 |
| KIAA0895L | 1 | 0 | 0 | 0 | 0 | 1 | 22 | 0.045454545 |
| SEMA4D    | 1 | 0 | 0 | 0 | 0 | 1 | 22 | 0.045454545 |
| RAG2      | 1 | 0 | 0 | 0 | 0 | 1 | 22 | 0.045454545 |
| SHE       | 1 | 0 | 0 | 0 | 0 | 1 | 22 | 0.045454545 |
| SMYD2     | 1 | 0 | 0 | 0 | 0 | 1 | 22 | 0.045454545 |
| PHEX      | 1 | 0 | 0 | 0 | 0 | 1 | 22 | 0.045454545 |
| GALNT2    | 1 | 0 | 0 | 0 | 0 | 1 | 22 | 0.045454545 |
| LARS      | 1 | 0 | 0 | 0 | 0 | 1 | 22 | 0.045454545 |
| SDSL      | 1 | 0 | 0 | 0 | 0 | 1 | 22 | 0.045454545 |
| PTPRG     | 1 | 0 | 0 | 0 | 0 | 1 | 22 | 0.045454545 |
| DNAH5     | 1 | 0 | 0 | 0 | 0 | 1 | 22 | 0.045454545 |
| DOPEY2    | 1 | 0 | 0 | 0 | 0 | 1 | 22 | 0.045454545 |
| BCKDK     | 1 | 0 | 0 | 0 | 0 | 1 | 22 | 0.045454545 |
| COX18     | 1 | 0 | 0 | 0 | 0 | 1 | 22 | 0.045454545 |
| TMEM217   | 1 | 0 | 0 | 0 | 0 | 1 | 22 | 0.045454545 |
| GPR98     | 1 | 0 | 0 | 0 | 0 | 1 | 22 | 0.045454545 |
| FBXL20    | 1 | 0 | 0 | 0 | 0 | 1 | 22 | 0.045454545 |
| BTK       | 1 | 0 | 0 | 0 | 0 | 1 | 22 | 0.045454545 |
| HDAC3     | 1 | 0 | 0 | 0 | 0 | 1 | 22 | 0.045454545 |
| CD72      | 1 | 0 | 0 | 0 | 0 | 1 | 22 | 0.045454545 |
| CCDC48    | 0 | 1 | 0 | 0 | 0 | 1 | 22 | 0.045454545 |
| AMPD3     | 1 | 0 | 0 | 0 | 0 | 1 | 22 | 0.045454545 |
| ZFHX4     | 1 | 0 | 0 | 0 | 0 | 1 | 22 | 0.045454545 |
| AMPD1     | 1 | 0 | 0 | 0 | 0 | 1 | 22 | 0.045454545 |
| ATM       | 0 | 1 | 0 | 0 | 0 | 1 | 22 | 0.045454545 |
| EGFLAM    | 1 | 0 | 0 | 0 | 0 | 1 | 22 | 0.045454545 |
| CYLC1     | 0 | 0 | 0 | 1 | 0 | 1 | 22 | 0.045454545 |
| FABP4     | 1 | 0 | 0 | 0 | 0 | 1 | 22 | 0.045454545 |

|          |   |   |   |   |   |   |    |             |
|----------|---|---|---|---|---|---|----|-------------|
| KIF17    | 1 | 0 | 0 | 0 | 0 | 1 | 22 | 0.045454545 |
| ATR      | 1 | 0 | 0 | 0 | 0 | 1 | 22 | 0.045454545 |
| HNRNPH1  | 0 | 0 | 1 | 0 | 0 | 1 | 22 | 0.045454545 |
| EPCAM    | 0 | 1 | 0 | 0 | 0 | 1 | 22 | 0.045454545 |
| RNF113B  | 1 | 0 | 0 | 0 | 0 | 1 | 22 | 0.045454545 |
| FLT1     | 1 | 0 | 0 | 0 | 0 | 1 | 22 | 0.045454545 |
| MYH3     | 1 | 0 | 0 | 0 | 0 | 1 | 22 | 0.045454545 |
| ZBTB11   | 1 | 0 | 0 | 0 | 0 | 1 | 22 | 0.045454545 |
| COG6     | 1 | 0 | 0 | 0 | 0 | 1 | 22 | 0.045454545 |
| INS-IGF2 | 1 | 0 | 0 | 0 | 0 | 1 | 22 | 0.045454545 |
| GAS2L3   | 1 | 0 | 0 | 0 | 0 | 1 | 22 | 0.045454545 |
| NLRP9    | 0 | 1 | 0 | 0 | 0 | 1 | 22 | 0.045454545 |
| RPS6KB2  | 1 | 0 | 0 | 0 | 0 | 1 | 22 | 0.045454545 |
| QSOX2    | 1 | 0 | 0 | 0 | 0 | 1 | 22 | 0.045454545 |
| FANCC    | 1 | 0 | 0 | 0 | 0 | 1 | 22 | 0.045454545 |
| FANCB    | 1 | 0 | 0 | 0 | 0 | 1 | 22 | 0.045454545 |
| GABRG2   | 1 | 0 | 0 | 0 | 0 | 1 | 22 | 0.045454545 |
| VGLL3    | 1 | 0 | 0 | 0 | 0 | 1 | 22 | 0.045454545 |
| TTC27    | 1 | 0 | 0 | 0 | 0 | 1 | 22 | 0.045454545 |
| CADM3    | 1 | 0 | 0 | 0 | 0 | 1 | 22 | 0.045454545 |
| ACVR2A   | 0 | 0 | 0 | 1 | 0 | 1 | 22 | 0.045454545 |
| GRIA1    | 1 | 0 | 0 | 0 | 0 | 1 | 22 | 0.045454545 |
| KLHL14   | 1 | 0 | 0 | 0 | 0 | 1 | 22 | 0.045454545 |
| OR2K2    | 1 | 0 | 0 | 0 | 0 | 1 | 22 | 0.045454545 |
| MTMR11   | 1 | 0 | 0 | 0 | 0 | 1 | 22 | 0.045454545 |
| PUS7     | 1 | 0 | 0 | 0 | 0 | 1 | 22 | 0.045454545 |
| GNB3     | 1 | 0 | 0 | 0 | 0 | 1 | 22 | 0.045454545 |
| FAM105A  | 1 | 0 | 0 | 0 | 0 | 1 | 22 | 0.045454545 |
| MTOR     | 1 | 0 | 0 | 0 | 0 | 1 | 22 | 0.045454545 |
| MED27    | 1 | 0 | 0 | 0 | 0 | 1 | 22 | 0.045454545 |
| TSEN54   | 1 | 0 | 0 | 0 | 0 | 1 | 22 | 0.045454545 |
| ANO3     | 1 | 0 | 0 | 0 | 0 | 1 | 22 | 0.045454545 |
| TAOK3    | 1 | 0 | 0 | 0 | 0 | 1 | 22 | 0.045454545 |
| CYP24A1  | 0 | 0 | 1 | 0 | 0 | 1 | 22 | 0.045454545 |
| GRIK3    | 1 | 0 | 0 | 0 | 0 | 1 | 22 | 0.045454545 |
| HAS1     | 1 | 0 | 0 | 0 | 0 | 1 | 22 | 0.045454545 |
| RPL10A   | 0 | 0 | 0 | 1 | 0 | 1 | 22 | 0.045454545 |
| KCNRG    | 1 | 0 | 0 | 0 | 0 | 1 | 22 | 0.045454545 |
| TGFB2    | 1 | 0 | 0 | 0 | 0 | 1 | 22 | 0.045454545 |
| FGD4     | 1 | 0 | 0 | 0 | 0 | 1 | 22 | 0.045454545 |
| BPI      | 1 | 0 | 0 | 0 | 0 | 1 | 22 | 0.045454545 |
| SF3B1    | 0 | 0 | 1 | 0 | 0 | 1 | 22 | 0.045454545 |

|          |   |   |   |   |   |   |    |             |
|----------|---|---|---|---|---|---|----|-------------|
| PRKAA1   | 1 | 0 | 0 | 0 | 0 | 1 | 22 | 0.045454545 |
| SF3B2    | 1 | 0 | 0 | 0 | 0 | 1 | 22 | 0.045454545 |
| PRSS1    | 1 | 0 | 0 | 0 | 0 | 1 | 22 | 0.045454545 |
| NLRP14   | 1 | 0 | 0 | 0 | 0 | 1 | 22 | 0.045454545 |
| KIAA0430 | 1 | 0 | 0 | 0 | 0 | 1 | 22 | 0.045454545 |
| SLC5A5   | 1 | 0 | 0 | 0 | 0 | 1 | 22 | 0.045454545 |
| COL3A1   | 1 | 0 | 0 | 0 | 0 | 1 | 22 | 0.045454545 |
| SORBS1   | 1 | 0 | 0 | 0 | 0 | 1 | 22 | 0.045454545 |
| SMARCA1  | 0 | 1 | 0 | 0 | 0 | 1 | 22 | 0.045454545 |
| ACCS     | 1 | 0 | 0 | 0 | 0 | 1 | 22 | 0.045454545 |
| LOXL4    | 1 | 0 | 0 | 0 | 0 | 1 | 22 | 0.045454545 |
| PHACTR3  | 1 | 0 | 0 | 0 | 0 | 1 | 22 | 0.045454545 |
| IL18RAP  | 1 | 0 | 0 | 0 | 0 | 1 | 22 | 0.045454545 |
| CTCF     | 1 | 0 | 0 | 0 | 0 | 1 | 22 | 0.045454545 |
| MMRN1    | 1 | 0 | 0 | 0 | 0 | 1 | 22 | 0.045454545 |
| FYN      | 0 | 1 | 0 | 0 | 0 | 1 | 22 | 0.045454545 |
| OR5F1    | 1 | 0 | 0 | 0 | 0 | 1 | 22 | 0.045454545 |
| ADCK1    | 1 | 0 | 0 | 0 | 0 | 1 | 22 | 0.045454545 |
| DNAJC14  | 0 | 1 | 0 | 0 | 0 | 1 | 22 | 0.045454545 |
| MED13    | 1 | 0 | 0 | 0 | 0 | 1 | 22 | 0.045454545 |
| MED14    | 1 | 0 | 0 | 0 | 0 | 1 | 22 | 0.045454545 |
| ABCB4    | 0 | 0 | 0 | 1 | 0 | 1 | 22 | 0.045454545 |
| NBAS     | 1 | 0 | 0 | 0 | 0 | 1 | 22 | 0.045454545 |
| PACSIN3  | 1 | 0 | 0 | 0 | 0 | 1 | 22 | 0.045454545 |
| RP1      | 2 | 0 | 0 | 0 | 0 | 1 | 22 | 0.045454545 |
| MATN4    | 1 | 0 | 0 | 0 | 0 | 1 | 22 | 0.045454545 |
| INTS5    | 1 | 0 | 0 | 0 | 0 | 1 | 22 | 0.045454545 |
| INTS4    | 1 | 0 | 0 | 0 | 0 | 1 | 22 | 0.045454545 |
| DIRC1    | 1 | 0 | 0 | 0 | 0 | 1 | 22 | 0.045454545 |
| CARD11   | 1 | 0 | 0 | 0 | 0 | 1 | 22 | 0.045454545 |
| INTS8    | 1 | 0 | 0 | 0 | 0 | 1 | 22 | 0.045454545 |
| ATP10D   | 0 | 0 | 0 | 1 | 0 | 1 | 22 | 0.045454545 |
| BOD1L    | 1 | 0 | 0 | 0 | 0 | 1 | 22 | 0.045454545 |
| CD4      | 1 | 0 | 0 | 0 | 0 | 1 | 22 | 0.045454545 |
| FCGR2A   | 0 | 0 | 1 | 0 | 0 | 1 | 22 | 0.045454545 |
| SMAD3    | 1 | 0 | 0 | 0 | 0 | 1 | 22 | 0.045454545 |
| DBC1     | 1 | 0 | 0 | 0 | 0 | 1 | 22 | 0.045454545 |
| EBF1     | 1 | 0 | 0 | 0 | 0 | 1 | 22 | 0.045454545 |
| CADPS    | 1 | 0 | 0 | 0 | 0 | 1 | 22 | 0.045454545 |
| CTNNA1   | 1 | 0 | 0 | 0 | 0 | 1 | 22 | 0.045454545 |
| CHST12   | 0 | 0 | 0 | 1 | 0 | 1 | 22 | 0.045454545 |
| CHST15   | 1 | 0 | 0 | 0 | 0 | 1 | 22 | 0.045454545 |

|          |   |   |   |   |   |   |    |             |
|----------|---|---|---|---|---|---|----|-------------|
| SUSD1    | 1 | 0 | 0 | 0 | 0 | 1 | 22 | 0.045454545 |
| WDR47    | 1 | 0 | 0 | 0 | 0 | 1 | 22 | 0.045454545 |
| CSTF1    | 1 | 0 | 0 | 0 | 0 | 1 | 22 | 0.045454545 |
| NSUN4    | 1 | 0 | 0 | 0 | 0 | 1 | 22 | 0.045454545 |
| CSTF3    | 0 | 0 | 0 | 1 | 0 | 1 | 22 | 0.045454545 |
| NOTCH3   | 1 | 0 | 0 | 0 | 0 | 1 | 22 | 0.045454545 |
| CACNG8   | 1 | 0 | 0 | 0 | 0 | 1 | 22 | 0.045454545 |
| USP45    | 1 | 0 | 0 | 0 | 0 | 1 | 22 | 0.045454545 |
| ZNF790   | 0 | 0 | 0 | 1 | 0 | 1 | 22 | 0.045454545 |
| ZNF91    | 1 | 0 | 0 | 0 | 0 | 1 | 22 | 0.045454545 |
| BACH2    | 1 | 0 | 0 | 0 | 0 | 1 | 22 | 0.045454545 |
| MMP2     | 1 | 0 | 0 | 0 | 0 | 1 | 22 | 0.045454545 |
| PCDHB1   | 1 | 0 | 0 | 0 | 0 | 1 | 22 | 0.045454545 |
| EP300    | 0 | 1 | 0 | 0 | 0 | 1 | 22 | 0.045454545 |
| TM7SF3   | 0 | 1 | 0 | 0 | 0 | 1 | 22 | 0.045454545 |
| RAB3IP   | 0 | 1 | 0 | 0 | 0 | 1 | 22 | 0.045454545 |
| NUDT15   | 1 | 0 | 0 | 0 | 0 | 1 | 22 | 0.045454545 |
| LRRRC16B | 1 | 0 | 0 | 0 | 0 | 1 | 22 | 0.045454545 |
| MYL6     | 0 | 0 | 0 | 1 | 0 | 1 | 22 | 0.045454545 |
| TRPM1    | 0 | 1 | 0 | 0 | 0 | 1 | 22 | 0.045454545 |
| CHN1     | 1 | 0 | 0 | 0 | 0 | 1 | 22 | 0.045454545 |
| N4BP2L2  | 1 | 0 | 0 | 0 | 0 | 1 | 22 | 0.045454545 |
| POLR3B   | 1 | 0 | 0 | 0 | 0 | 1 | 22 | 0.045454545 |
| PPIL6    | 1 | 0 | 0 | 0 | 0 | 1 | 22 | 0.045454545 |
| MYL1     | 1 | 0 | 0 | 0 | 0 | 1 | 22 | 0.045454545 |
| CCNT1    | 1 | 0 | 0 | 0 | 0 | 1 | 22 | 0.045454545 |
| SYNE2    | 1 | 0 | 0 | 0 | 0 | 1 | 22 | 0.045454545 |
| PAM      | 1 | 0 | 0 | 0 | 0 | 1 | 22 | 0.045454545 |
| SOX30    | 1 | 0 | 0 | 0 | 0 | 1 | 22 | 0.045454545 |
| TRIM63   | 1 | 0 | 0 | 0 | 0 | 1 | 22 | 0.045454545 |
| PPP1R3A  | 1 | 0 | 0 | 0 | 0 | 1 | 22 | 0.045454545 |
| MPP3     | 1 | 0 | 0 | 0 | 0 | 1 | 22 | 0.045454545 |
| MAP3K3   | 1 | 0 | 0 | 0 | 0 | 1 | 22 | 0.045454545 |
| DNMT1    | 1 | 0 | 0 | 0 | 0 | 1 | 22 | 0.045454545 |
| CACNA1E  | 1 | 0 | 0 | 0 | 0 | 1 | 22 | 0.045454545 |
| PROX1    | 1 | 0 | 0 | 0 | 0 | 1 | 22 | 0.045454545 |
| GSTA4    | 1 | 0 | 0 | 0 | 0 | 1 | 22 | 0.045454545 |
| C10orf96 | 1 | 0 | 0 | 0 | 0 | 1 | 22 | 0.045454545 |
| ZNF471   | 1 | 0 | 0 | 0 | 0 | 1 | 22 | 0.045454545 |
| CUL5     | 1 | 0 | 0 | 0 | 0 | 1 | 22 | 0.045454545 |
| MBNL2    | 0 | 1 | 0 | 0 | 0 | 1 | 22 | 0.045454545 |
| C15orf43 | 1 | 0 | 0 | 0 | 0 | 1 | 22 | 0.045454545 |

|           |   |   |   |   |   |   |    |             |
|-----------|---|---|---|---|---|---|----|-------------|
| SETDB1    | 1 | 0 | 0 | 0 | 0 | 1 | 22 | 0.045454545 |
| CUL2      | 1 | 0 | 0 | 0 | 0 | 1 | 22 | 0.045454545 |
| MAPRE2    | 1 | 0 | 0 | 0 | 0 | 1 | 22 | 0.045454545 |
| KIAA0319L | 1 | 0 | 0 | 0 | 0 | 1 | 22 | 0.045454545 |
| ERBB3     | 1 | 0 | 0 | 0 | 0 | 1 | 22 | 0.045454545 |
| PRMT8     | 1 | 0 | 0 | 0 | 0 | 1 | 22 | 0.045454545 |
| HUWE1     | 1 | 0 | 0 | 0 | 0 | 1 | 22 | 0.045454545 |
| CASZ1     | 0 | 1 | 0 | 0 | 0 | 1 | 22 | 0.045454545 |
| ZNF200    | 1 | 0 | 0 | 0 | 0 | 1 | 22 | 0.045454545 |
| FPR1      | 1 | 0 | 0 | 0 | 0 | 1 | 22 | 0.045454545 |
| IDH1      | 2 | 0 | 0 | 0 | 0 | 1 | 22 | 0.045454545 |
| FPR3      | 1 | 0 | 0 | 0 | 0 | 1 | 22 | 0.045454545 |
| CDH26     | 0 | 1 | 0 | 0 | 0 | 1 | 22 | 0.045454545 |
| POSTN     | 1 | 0 | 0 | 0 | 0 | 1 | 22 | 0.045454545 |
| TRPS1     | 1 | 0 | 0 | 0 | 0 | 1 | 22 | 0.045454545 |
| ERBB4     | 1 | 0 | 0 | 0 | 0 | 1 | 22 | 0.045454545 |
| MTPAP     | 1 | 0 | 0 | 0 | 0 | 1 | 22 | 0.045454545 |
| FNDC3B    | 1 | 0 | 0 | 0 | 0 | 1 | 22 | 0.045454545 |
| ADCY6     | 1 | 0 | 0 | 0 | 0 | 1 | 22 | 0.045454545 |
| RBM43     | 0 | 0 | 0 | 1 | 0 | 1 | 22 | 0.045454545 |
| ADCY2     | 1 | 0 | 0 | 0 | 0 | 1 | 22 | 0.045454545 |
| SLTM      | 0 | 1 | 0 | 0 | 0 | 1 | 22 | 0.045454545 |
| KIF5A     | 1 | 0 | 0 | 0 | 0 | 1 | 22 | 0.045454545 |
| MYLK      | 0 | 0 | 1 | 0 | 0 | 1 | 22 | 0.045454545 |
| RNF182    | 0 | 1 | 0 | 0 | 0 | 1 | 22 | 0.045454545 |
| UTRN      | 0 | 0 | 1 | 0 | 0 | 1 | 22 | 0.045454545 |
| PKD2      | 1 | 0 | 0 | 0 | 0 | 1 | 22 | 0.045454545 |
| RNF213    | 1 | 0 | 0 | 0 | 0 | 1 | 22 | 0.045454545 |
| CSRP2BP   | 1 | 0 | 0 | 0 | 0 | 1 | 22 | 0.045454545 |
| DMD       | 0 | 1 | 0 | 0 | 0 | 1 | 22 | 0.045454545 |
| C4orf22   | 0 | 0 | 0 | 1 | 0 | 1 | 22 | 0.045454545 |
| GRIA4     | 1 | 0 | 0 | 0 | 0 | 1 | 22 | 0.045454545 |
| NTSR1     | 1 | 0 | 0 | 0 | 0 | 1 | 22 | 0.045454545 |
| CRTC3     | 1 | 0 | 0 | 0 | 0 | 1 | 22 | 0.045454545 |
| CDYL2     | 1 | 0 | 0 | 0 | 0 | 1 | 22 | 0.045454545 |
| FAM13C    | 1 | 0 | 0 | 0 | 0 | 1 | 22 | 0.045454545 |
| SEPT6     | 0 | 0 | 1 | 0 | 0 | 1 | 22 | 0.045454545 |
| XRCC5     | 1 | 0 | 0 | 0 | 0 | 1 | 22 | 0.045454545 |
| ERAL1     | 1 | 0 | 0 | 0 | 0 | 1 | 22 | 0.045454545 |
| PCDHB8    | 1 | 0 | 0 | 0 | 0 | 1 | 22 | 0.045454545 |
| PCDHB3    | 1 | 0 | 0 | 0 | 0 | 1 | 22 | 0.045454545 |
| ADAD1     | 1 | 0 | 0 | 0 | 0 | 1 | 22 | 0.045454545 |

|          |   |   |   |   |   |   |    |             |
|----------|---|---|---|---|---|---|----|-------------|
| LIMCH1   | 1 | 0 | 0 | 0 | 0 | 1 | 22 | 0.045454545 |
| PPM1L    | 1 | 0 | 0 | 0 | 0 | 1 | 22 | 0.045454545 |
| PCDHB5   | 1 | 0 | 0 | 0 | 0 | 1 | 22 | 0.045454545 |
| SCNN1G   | 1 | 0 | 0 | 0 | 0 | 1 | 22 | 0.045454545 |
| TIAM1    | 1 | 0 | 0 | 0 | 0 | 1 | 22 | 0.045454545 |
| JMJD1C   | 0 | 1 | 0 | 0 | 0 | 1 | 22 | 0.045454545 |
| TRPM5    | 1 | 0 | 0 | 0 | 0 | 1 | 22 | 0.045454545 |
| TRPM6    | 0 | 0 | 0 | 1 | 0 | 1 | 22 | 0.045454545 |
| CARD6    | 1 | 0 | 0 | 0 | 0 | 1 | 22 | 0.045454545 |
| FCN1     | 1 | 0 | 0 | 0 | 0 | 1 | 22 | 0.045454545 |
| SPANXN2  | 0 | 0 | 0 | 1 | 0 | 1 | 22 | 0.045454545 |
| GBP2     | 0 | 0 | 0 | 1 | 0 | 1 | 22 | 0.045454545 |
| EHBP1    | 1 | 0 | 0 | 0 | 0 | 1 | 22 | 0.045454545 |
| UNC5D    | 0 | 1 | 0 | 0 | 0 | 1 | 22 | 0.045454545 |
| HERC3    | 1 | 0 | 0 | 0 | 0 | 1 | 22 | 0.045454545 |
| TRRAP    | 1 | 0 | 0 | 0 | 0 | 1 | 22 | 0.045454545 |
| RPUSD2   | 1 | 0 | 0 | 0 | 0 | 1 | 22 | 0.045454545 |
| DDX60    | 1 | 0 | 0 | 0 | 0 | 1 | 22 | 0.045454545 |
| GIMAP4   | 1 | 0 | 0 | 0 | 0 | 1 | 22 | 0.045454545 |
| PWP2     | 1 | 0 | 0 | 0 | 0 | 1 | 22 | 0.045454545 |
| PCDHGA7  | 1 | 0 | 0 | 0 | 0 | 1 | 22 | 0.045454545 |
| PTPN5    | 1 | 0 | 0 | 0 | 0 | 1 | 22 | 0.045454545 |
| MRPL9    | 1 | 0 | 0 | 0 | 0 | 1 | 22 | 0.045454545 |
| ABCA12   | 1 | 0 | 0 | 0 | 0 | 1 | 22 | 0.045454545 |
| ABCA13   | 1 | 0 | 0 | 0 | 0 | 1 | 22 | 0.045454545 |
| ESR2     | 1 | 0 | 0 | 0 | 0 | 1 | 22 | 0.045454545 |
| OTOA     | 1 | 0 | 0 | 0 | 0 | 1 | 22 | 0.045454545 |
| PALB2    | 0 | 0 | 0 | 1 | 0 | 1 | 22 | 0.045454545 |
| C19orf47 | 1 | 0 | 0 | 0 | 0 | 1 | 22 | 0.045454545 |
| PTCD2    | 1 | 0 | 0 | 0 | 0 | 1 | 22 | 0.045454545 |
| SI       | 1 | 0 | 0 | 0 | 0 | 1 | 22 | 0.045454545 |
| ST8SIA1  | 1 | 0 | 0 | 0 | 0 | 1 | 22 | 0.045454545 |
| MELK     | 1 | 0 | 0 | 0 | 0 | 1 | 22 | 0.045454545 |
| C20orf43 | 1 | 0 | 0 | 0 | 0 | 1 | 22 | 0.045454545 |
| OR6N1    | 1 | 0 | 0 | 0 | 0 | 1 | 22 | 0.045454545 |
| PHF2     | 1 | 0 | 0 | 0 | 0 | 1 | 22 | 0.045454545 |
| TOP3B    | 1 | 0 | 0 | 0 | 0 | 1 | 22 | 0.045454545 |
| OR51F1   | 1 | 0 | 0 | 0 | 0 | 1 | 22 | 0.045454545 |
| MYOM2    | 1 | 0 | 0 | 0 | 0 | 1 | 22 | 0.045454545 |
| PMP2     | 0 | 0 | 0 | 0 | 1 | 1 | 22 | 0.045454545 |
| KMO      | 0 | 0 | 0 | 1 | 0 | 1 | 22 | 0.045454545 |
| LCLAT1   | 1 | 0 | 0 | 0 | 0 | 1 | 22 | 0.045454545 |

|          |   |   |   |   |   |   |    |             |
|----------|---|---|---|---|---|---|----|-------------|
| C6orf57  | 0 | 1 | 0 | 0 | 0 | 1 | 22 | 0.045454545 |
| KRT1     | 1 | 0 | 0 | 0 | 0 | 1 | 22 | 0.045454545 |
| UPF1     | 1 | 0 | 0 | 0 | 0 | 1 | 22 | 0.045454545 |
| ADAMTS18 | 1 | 0 | 0 | 0 | 0 | 1 | 22 | 0.045454545 |
| KCNA3    | 1 | 0 | 0 | 0 | 0 | 1 | 22 | 0.045454545 |
| SCPEP1   | 1 | 0 | 0 | 0 | 0 | 1 | 22 | 0.045454545 |
| FLG2     | 1 | 0 | 0 | 0 | 0 | 1 | 22 | 0.045454545 |
| SPRR3    | 1 | 0 | 0 | 0 | 0 | 1 | 22 | 0.045454545 |
| STAT4    | 1 | 0 | 0 | 0 | 0 | 1 | 22 | 0.045454545 |
| SEC23A   | 1 | 0 | 0 | 0 | 0 | 1 | 22 | 0.045454545 |
| CAPN6    | 1 | 0 | 0 | 0 | 0 | 1 | 22 | 0.045454545 |
| CPXM1    | 1 | 0 | 0 | 0 | 0 | 1 | 22 | 0.045454545 |
| ZNF385B  | 1 | 0 | 0 | 0 | 0 | 1 | 22 | 0.045454545 |
| CASK     | 1 | 0 | 0 | 0 | 0 | 1 | 22 | 0.045454545 |
| FHL2     | 1 | 0 | 0 | 0 | 0 | 1 | 22 | 0.045454545 |
| GTF2A1L  | 1 | 0 | 0 | 0 | 0 | 1 | 22 | 0.045454545 |
| C20orf70 | 1 | 0 | 0 | 0 | 0 | 1 | 22 | 0.045454545 |
| SLC6A13  | 1 | 0 | 0 | 0 | 0 | 1 | 22 | 0.045454545 |
| EPS15    | 2 | 0 | 0 | 0 | 0 | 1 | 22 | 0.045454545 |
| ZIM3     | 1 | 0 | 0 | 0 | 0 | 1 | 22 | 0.045454545 |
| PDYN     | 1 | 0 | 0 | 0 | 0 | 1 | 22 | 0.045454545 |
| RIMBP2   | 1 | 0 | 0 | 0 | 0 | 1 | 22 | 0.045454545 |
| ACACB    | 1 | 0 | 0 | 0 | 0 | 1 | 22 | 0.045454545 |
| CCDC30   | 0 | 1 | 0 | 0 | 0 | 1 | 22 | 0.045454545 |
| EFNA4    | 0 | 0 | 0 | 0 | 1 | 1 | 22 | 0.045454545 |
| SLFN11   | 1 | 0 | 0 | 0 | 0 | 1 | 22 | 0.045454545 |
| EIF2C3   | 1 | 0 | 0 | 0 | 0 | 1 | 22 | 0.045454545 |
| APPL1    | 1 | 0 | 0 | 0 | 0 | 1 | 22 | 0.045454545 |
| GPR64    | 1 | 0 | 0 | 0 | 0 | 1 | 22 | 0.045454545 |
| ADAM29   | 0 | 0 | 0 | 1 | 0 | 1 | 22 | 0.045454545 |
| AJAP1    | 1 | 0 | 0 | 0 | 0 | 1 | 22 | 0.045454545 |
| IL19     | 1 | 0 | 0 | 0 | 0 | 1 | 22 | 0.045454545 |
| KCNJ1    | 0 | 1 | 0 | 0 | 0 | 1 | 22 | 0.045454545 |
| VASH1    | 1 | 0 | 0 | 0 | 0 | 1 | 22 | 0.045454545 |
| TUSC3    | 1 | 0 | 0 | 0 | 0 | 1 | 22 | 0.045454545 |
| PLXNA4   | 1 | 0 | 0 | 0 | 0 | 1 | 22 | 0.045454545 |
| C9orf135 | 1 | 0 | 0 | 0 | 0 | 1 | 22 | 0.045454545 |
| MYO16    | 1 | 0 | 0 | 0 | 0 | 1 | 22 | 0.045454545 |
| KIAA1217 | 1 | 0 | 0 | 0 | 0 | 1 | 22 | 0.045454545 |
| SEPP1    | 0 | 0 | 0 | 1 | 0 | 1 | 22 | 0.045454545 |
| CDH10    | 1 | 0 | 0 | 0 | 0 | 1 | 22 | 0.045454545 |
| INSC     | 0 | 0 | 0 | 0 | 1 | 1 | 22 | 0.045454545 |

|           |   |   |   |   |   |   |    |             |
|-----------|---|---|---|---|---|---|----|-------------|
| CYFIP1    | 1 | 0 | 0 | 0 | 0 | 1 | 22 | 0.045454545 |
| RNF38     | 0 | 0 | 1 | 0 | 0 | 1 | 22 | 0.045454545 |
| C17orf47  | 1 | 0 | 0 | 0 | 0 | 1 | 22 | 0.045454545 |
| TCN1      | 1 | 0 | 0 | 0 | 0 | 1 | 22 | 0.045454545 |
| TRMT2B    | 0 | 0 | 0 | 1 | 0 | 1 | 22 | 0.045454545 |
| SNX24     | 1 | 0 | 0 | 0 | 0 | 1 | 22 | 0.045454545 |
| BMPR1A    | 1 | 0 | 0 | 0 | 0 | 1 | 22 | 0.045454545 |
| MAP2K7    | 1 | 0 | 0 | 0 | 0 | 1 | 22 | 0.045454545 |
| MDH2      | 1 | 0 | 0 | 0 | 0 | 1 | 22 | 0.045454545 |
| PEX13     | 1 | 0 | 0 | 0 | 0 | 1 | 22 | 0.045454545 |
| DCLRE1B   | 1 | 0 | 0 | 0 | 0 | 1 | 22 | 0.045454545 |
| TMEM159   | 1 | 0 | 0 | 0 | 0 | 1 | 22 | 0.045454545 |
| SPTBN1    | 1 | 0 | 0 | 0 | 0 | 1 | 22 | 0.045454545 |
| AP3B1     | 1 | 0 | 0 | 0 | 0 | 1 | 22 | 0.045454545 |
| VEPH1     | 1 | 0 | 0 | 0 | 0 | 1 | 22 | 0.045454545 |
| NXN       | 1 | 0 | 0 | 0 | 0 | 1 | 22 | 0.045454545 |
| FAM171B   | 1 | 0 | 0 | 0 | 0 | 1 | 22 | 0.045454545 |
| NEFH      | 0 | 0 | 0 | 0 | 1 | 1 | 22 | 0.045454545 |
| RMI1      | 1 | 0 | 0 | 0 | 0 | 1 | 22 | 0.045454545 |
| SPAG6     | 1 | 0 | 0 | 0 | 0 | 1 | 22 | 0.045454545 |
| NIPBL     | 1 | 0 | 0 | 0 | 0 | 1 | 22 | 0.045454545 |
| KCNS2     | 1 | 0 | 0 | 0 | 0 | 1 | 22 | 0.045454545 |
| OR51T1    | 1 | 0 | 0 | 0 | 0 | 1 | 22 | 0.045454545 |
| SPOCD1    | 1 | 0 | 0 | 0 | 0 | 1 | 22 | 0.045454545 |
| RENBP     | 1 | 0 | 0 | 0 | 0 | 1 | 22 | 0.045454545 |
| PIGA      | 0 | 1 | 0 | 0 | 0 | 1 | 22 | 0.045454545 |
| BEND2     | 1 | 0 | 0 | 0 | 0 | 1 | 22 | 0.045454545 |
| ATP1B3    | 1 | 0 | 0 | 0 | 0 | 1 | 22 | 0.045454545 |
| TMEM198   | 1 | 0 | 0 | 0 | 0 | 1 | 22 | 0.045454545 |
| CYP2A7    | 1 | 0 | 0 | 0 | 0 | 1 | 22 | 0.045454545 |
| CASQ1     | 1 | 0 | 0 | 0 | 0 | 1 | 22 | 0.045454545 |
| IL21R     | 1 | 0 | 0 | 0 | 0 | 1 | 22 | 0.045454545 |
| ZNF804A   | 1 | 0 | 0 | 0 | 0 | 1 | 22 | 0.045454545 |
| MCM9      | 1 | 0 | 0 | 0 | 0 | 1 | 22 | 0.045454545 |
| ZNF804B   | 1 | 0 | 0 | 0 | 0 | 1 | 22 | 0.045454545 |
| PCDHA2    | 1 | 0 | 0 | 0 | 0 | 1 | 22 | 0.045454545 |
| HS1BP3    | 1 | 0 | 0 | 0 | 0 | 1 | 22 | 0.045454545 |
| CASP8     | 1 | 0 | 0 | 0 | 0 | 1 | 22 | 0.045454545 |
| ANKFN1    | 1 | 0 | 0 | 0 | 0 | 1 | 22 | 0.045454545 |
| BCL9      | 0 | 0 | 0 | 1 | 0 | 1 | 22 | 0.045454545 |
| CDR2      | 1 | 0 | 0 | 0 | 0 | 1 | 22 | 0.045454545 |
| HIST1H2BE | 1 | 0 | 0 | 0 | 0 | 1 | 22 | 0.045454545 |



|          |   |   |   |   |   |   |    |             |
|----------|---|---|---|---|---|---|----|-------------|
| RSPH6A   | 0 | 0 | 0 | 0 | 1 | 1 | 22 | 0.045454545 |
| PLAUR    | 1 | 0 | 0 | 0 | 0 | 1 | 22 | 0.045454545 |
| ABCC3    | 1 | 0 | 0 | 0 | 0 | 1 | 22 | 0.045454545 |
| AOC3     | 1 | 0 | 0 | 0 | 0 | 1 | 22 | 0.045454545 |
| TIMP2    | 1 | 0 | 0 | 0 | 0 | 1 | 22 | 0.045454545 |
| KIAA1841 | 1 | 0 | 0 | 0 | 0 | 1 | 22 | 0.045454545 |
| PCDHGB1  | 1 | 0 | 0 | 0 | 0 | 1 | 22 | 0.045454545 |
| FAM155A  | 1 | 0 | 0 | 0 | 0 | 1 | 22 | 0.045454545 |
| MS4A2    | 1 | 0 | 0 | 0 | 0 | 1 | 22 | 0.045454545 |
| MS4A1    | 1 | 0 | 0 | 0 | 0 | 1 | 22 | 0.045454545 |
| SPINT1   | 0 | 0 | 0 | 1 | 0 | 1 | 22 | 0.045454545 |
| CXorf58  | 1 | 0 | 0 | 0 | 0 | 1 | 22 | 0.045454545 |
| PCCA     | 1 | 0 | 0 | 0 | 0 | 1 | 22 | 0.045454545 |
| DOK3     | 1 | 0 | 0 | 0 | 0 | 1 | 22 | 0.045454545 |
| PFKM     | 1 | 0 | 0 | 0 | 0 | 1 | 22 | 0.045454545 |
| MYO1G    | 1 | 0 | 0 | 0 | 0 | 1 | 22 | 0.045454545 |
| TTYH2    | 1 | 0 | 0 | 0 | 0 | 1 | 22 | 0.045454545 |
| ACTC1    | 1 | 0 | 0 | 0 | 0 | 1 | 22 | 0.045454545 |
| SERPINB6 | 1 | 0 | 0 | 0 | 0 | 1 | 22 | 0.045454545 |
| SLC4A5   | 1 | 0 | 0 | 0 | 0 | 1 | 22 | 0.045454545 |
| ZNF667   | 1 | 0 | 0 | 0 | 0 | 1 | 22 | 0.045454545 |
| HIST1H1B | 1 | 0 | 0 | 0 | 0 | 1 | 22 | 0.045454545 |
| KIAA1244 | 1 | 0 | 0 | 0 | 0 | 1 | 22 | 0.045454545 |
| RNASE9   | 0 | 0 | 0 | 1 | 0 | 1 | 22 | 0.045454545 |
| SLC41A3  | 1 | 0 | 0 | 0 | 0 | 1 | 22 | 0.045454545 |
| COG5     | 0 | 0 | 1 | 0 | 0 | 1 | 22 | 0.045454545 |
| C14orf50 | 1 | 0 | 0 | 0 | 0 | 1 | 22 | 0.045454545 |
| DISP1    | 1 | 0 | 0 | 0 | 0 | 1 | 22 | 0.045454545 |
| KLHL4    | 1 | 0 | 0 | 0 | 0 | 1 | 22 | 0.045454545 |
| VPS13D   | 1 | 0 | 0 | 0 | 0 | 1 | 22 | 0.045454545 |
| GPR22    | 1 | 0 | 0 | 0 | 0 | 1 | 22 | 0.045454545 |
| SERPINB4 | 1 | 0 | 0 | 0 | 0 | 1 | 22 | 0.045454545 |
| SERPINB7 | 1 | 0 | 0 | 0 | 0 | 1 | 22 | 0.045454545 |
| SOCS5    | 0 | 0 | 0 | 1 | 0 | 1 | 22 | 0.045454545 |
| C12orf12 | 0 | 0 | 0 | 0 | 1 | 1 | 22 | 0.045454545 |
| CX3CR1   | 1 | 0 | 0 | 0 | 0 | 1 | 22 | 0.045454545 |
| MBTPS1   | 1 | 0 | 0 | 0 | 0 | 1 | 22 | 0.045454545 |
| EIF4G1   | 1 | 0 | 0 | 0 | 0 | 1 | 22 | 0.045454545 |
| KCTD14   | 1 | 0 | 0 | 0 | 0 | 1 | 22 | 0.045454545 |
| ACSL6    | 1 | 0 | 0 | 0 | 0 | 1 | 22 | 0.045454545 |
| WDR59    | 1 | 0 | 0 | 0 | 0 | 1 | 22 | 0.045454545 |
| ACSL5    | 1 | 0 | 0 | 0 | 0 | 1 | 22 | 0.045454545 |

|          |   |   |   |   |   |   |    |             |
|----------|---|---|---|---|---|---|----|-------------|
| NFS1     | 1 | 0 | 0 | 0 | 0 | 1 | 22 | 0.045454545 |
| L3MBTL3  | 0 | 1 | 0 | 0 | 0 | 1 | 22 | 0.045454545 |
| DARS2    | 1 | 0 | 0 | 0 | 0 | 1 | 22 | 0.045454545 |
| XRN1     | 0 | 1 | 0 | 0 | 0 | 1 | 22 | 0.045454545 |
| XRN2     | 1 | 0 | 0 | 0 | 0 | 1 | 22 | 0.045454545 |
| GLS      | 1 | 0 | 0 | 0 | 0 | 1 | 22 | 0.045454545 |
| PSG7     | 1 | 0 | 0 | 0 | 0 | 1 | 22 | 0.045454545 |
| SLC19A2  | 1 | 0 | 0 | 0 | 0 | 1 | 22 | 0.045454545 |
| ALDH1L1  | 1 | 0 | 0 | 0 | 0 | 1 | 22 | 0.045454545 |
| ZNF560   | 0 | 0 | 0 | 1 | 0 | 1 | 22 | 0.045454545 |
| KIAA1409 | 1 | 0 | 0 | 0 | 0 | 1 | 22 | 0.045454545 |
| TRIM38   | 1 | 0 | 0 | 0 | 0 | 1 | 22 | 0.045454545 |
| CCDC60   | 1 | 0 | 0 | 0 | 0 | 1 | 22 | 0.045454545 |
| ANKRD55  | 1 | 0 | 0 | 0 | 0 | 1 | 22 | 0.045454545 |
| ZNF844   | 1 | 0 | 0 | 0 | 0 | 1 | 22 | 0.045454545 |
| HP       | 1 | 0 | 0 | 0 | 0 | 1 | 22 | 0.045454545 |
| FMN1     | 0 | 0 | 1 | 0 | 0 | 1 | 22 | 0.045454545 |
| DCLK2    | 1 | 0 | 0 | 0 | 0 | 1 | 22 | 0.045454545 |
| SLAIN1   | 0 | 1 | 0 | 0 | 0 | 1 | 22 | 0.045454545 |
| NOX5     | 0 | 1 | 0 | 0 | 0 | 1 | 22 | 0.045454545 |
| SPRYD5   | 1 | 0 | 0 | 0 | 0 | 1 | 22 | 0.045454545 |
| DPPA4    | 1 | 0 | 0 | 0 | 0 | 1 | 22 | 0.045454545 |
| TLR2     | 1 | 0 | 0 | 0 | 0 | 1 | 22 | 0.045454545 |
| FAM200A  | 1 | 0 | 0 | 0 | 0 | 1 | 22 | 0.045454545 |
| FLG      | 1 | 0 | 0 | 0 | 0 | 1 | 22 | 0.045454545 |
| PTN      | 0 | 0 | 0 | 1 | 0 | 1 | 22 | 0.045454545 |
| CHD3     | 1 | 0 | 0 | 0 | 0 | 1 | 22 | 0.045454545 |
| IGF2R    | 0 | 1 | 0 | 0 | 0 | 1 | 22 | 0.045454545 |
| PREX2    | 1 | 0 | 0 | 0 | 0 | 1 | 22 | 0.045454545 |
| CHD4     | 1 | 0 | 0 | 0 | 0 | 1 | 22 | 0.045454545 |
| CHD6     | 1 | 0 | 0 | 0 | 0 | 1 | 22 | 0.045454545 |
| TSC2     | 1 | 0 | 0 | 0 | 0 | 1 | 22 | 0.045454545 |
| NKAPL    | 1 | 0 | 0 | 0 | 0 | 1 | 22 | 0.045454545 |
| THBS2    | 1 | 0 | 0 | 0 | 0 | 1 | 22 | 0.045454545 |
| SOHLH1   | 1 | 0 | 0 | 0 | 0 | 1 | 22 | 0.045454545 |
| MED12L   | 1 | 0 | 0 | 0 | 0 | 1 | 22 | 0.045454545 |
| PRPS1L1  | 1 | 0 | 0 | 0 | 0 | 1 | 22 | 0.045454545 |
| GUCY1A3  | 0 | 1 | 0 | 0 | 0 | 1 | 22 | 0.045454545 |
| GUCY1A2  | 1 | 0 | 0 | 0 | 0 | 1 | 22 | 0.045454545 |
| PIK3R3   | 0 | 1 | 0 | 0 | 0 | 1 | 22 | 0.045454545 |
| HTR2C    | 1 | 0 | 0 | 0 | 0 | 1 | 22 | 0.045454545 |
| MYST3    | 1 | 0 | 0 | 0 | 0 | 1 | 22 | 0.045454545 |

|          |   |   |   |   |   |   |    |             |
|----------|---|---|---|---|---|---|----|-------------|
| PSME4    | 0 | 0 | 1 | 0 | 0 | 1 | 22 | 0.045454545 |
| TROAP    | 2 | 0 | 0 | 0 | 0 | 1 | 22 | 0.045454545 |
| DCHS2    | 1 | 0 | 0 | 0 | 0 | 1 | 22 | 0.045454545 |
| C1QL4    | 1 | 0 | 0 | 0 | 0 | 1 | 22 | 0.045454545 |
| MRPL15   | 1 | 0 | 0 | 0 | 0 | 1 | 22 | 0.045454545 |
| TFEC     | 1 | 0 | 0 | 0 | 0 | 1 | 22 | 0.045454545 |
| NHSL2    | 1 | 0 | 0 | 0 | 0 | 1 | 22 | 0.045454545 |
| ANKRD27  | 1 | 0 | 0 | 0 | 0 | 1 | 22 | 0.045454545 |
| NPHS2    | 1 | 0 | 0 | 0 | 0 | 1 | 22 | 0.045454545 |
| POLR2C   | 1 | 0 | 0 | 0 | 0 | 1 | 22 | 0.045454545 |
| NELL2    | 1 | 0 | 0 | 0 | 0 | 1 | 22 | 0.045454545 |
| TRIM42   | 1 | 0 | 0 | 0 | 0 | 1 | 22 | 0.045454545 |
| OR7C2    | 0 | 0 | 0 | 1 | 0 | 1 | 22 | 0.045454545 |
| NLE1     | 0 | 1 | 0 | 0 | 0 | 1 | 22 | 0.045454545 |
| HENMT1   | 1 | 0 | 0 | 0 | 0 | 1 | 22 | 0.045454545 |
| TAF1     | 1 | 0 | 0 | 0 | 0 | 1 | 22 | 0.045454545 |
| G6PC     | 1 | 0 | 0 | 0 | 0 | 1 | 22 | 0.045454545 |
| SHROOM3  | 1 | 0 | 0 | 0 | 0 | 1 | 22 | 0.045454545 |
| PAK1     | 1 | 0 | 0 | 0 | 0 | 1 | 22 | 0.045454545 |
| BPIL1    | 1 | 0 | 0 | 0 | 0 | 1 | 22 | 0.045454545 |
| RBM23    | 0 | 0 | 0 | 0 | 1 | 1 | 22 | 0.045454545 |
| RBM20    | 1 | 0 | 0 | 0 | 0 | 1 | 22 | 0.045454545 |
| ACTR5    | 1 | 0 | 0 | 0 | 0 | 1 | 22 | 0.045454545 |
| VPS72    | 1 | 0 | 0 | 0 | 0 | 1 | 22 | 0.045454545 |
| BTN3A1   | 1 | 0 | 0 | 0 | 0 | 1 | 22 | 0.045454545 |
| SORCS1   | 0 | 0 | 1 | 0 | 0 | 1 | 22 | 0.045454545 |
| EPHA5    | 1 | 0 | 0 | 0 | 0 | 1 | 22 | 0.045454545 |
| NEB      | 1 | 0 | 0 | 0 | 0 | 1 | 22 | 0.045454545 |
| SDCBP    | 1 | 0 | 0 | 0 | 0 | 1 | 22 | 0.045454545 |
| FZD8     | 1 | 0 | 0 | 0 | 0 | 1 | 22 | 0.045454545 |
| C10orf72 | 1 | 0 | 0 | 0 | 0 | 1 | 22 | 0.045454545 |
| MAPK3    | 1 | 0 | 0 | 0 | 0 | 1 | 22 | 0.045454545 |
| UGT2B10  | 0 | 1 | 0 | 0 | 0 | 1 | 22 | 0.045454545 |
| ALDH18A1 | 1 | 0 | 0 | 0 | 0 | 1 | 22 | 0.045454545 |
| DUSP6    | 1 | 0 | 0 | 0 | 0 | 1 | 22 | 0.045454545 |
| RAP2C    | 1 | 0 | 0 | 0 | 0 | 1 | 22 | 0.045454545 |
| RBL2     | 1 | 0 | 0 | 0 | 0 | 1 | 22 | 0.045454545 |
| PCDH9    | 1 | 0 | 0 | 0 | 0 | 1 | 22 | 0.045454545 |
| CCDC13   | 1 | 0 | 0 | 0 | 0 | 1 | 22 | 0.045454545 |
| MARK3    | 0 | 1 | 0 | 0 | 0 | 1 | 22 | 0.045454545 |
| FERMT2   | 1 | 0 | 0 | 0 | 0 | 1 | 22 | 0.045454545 |
| TOMM70A  | 1 | 0 | 0 | 0 | 0 | 1 | 22 | 0.045454545 |

|          |   |   |   |   |   |   |    |             |
|----------|---|---|---|---|---|---|----|-------------|
| BAI3     | 1 | 0 | 0 | 0 | 0 | 1 | 22 | 0.045454545 |
| KCNB2    | 1 | 0 | 0 | 0 | 0 | 1 | 22 | 0.045454545 |
| OR8B8    | 1 | 0 | 0 | 0 | 0 | 1 | 22 | 0.045454545 |
| HNRNPUL2 | 1 | 0 | 0 | 0 | 0 | 1 | 22 | 0.045454545 |
| THNSL1   | 1 | 0 | 0 | 0 | 0 | 1 | 22 | 0.045454545 |
| HEY1     | 1 | 0 | 0 | 0 | 0 | 1 | 22 | 0.045454545 |
| XKR4     | 1 | 0 | 0 | 0 | 0 | 1 | 22 | 0.045454545 |
| FHOD3    | 1 | 0 | 0 | 0 | 0 | 1 | 22 | 0.045454545 |
| RGS12    | 1 | 0 | 0 | 0 | 0 | 1 | 22 | 0.045454545 |
| SOS2     | 1 | 0 | 0 | 0 | 0 | 1 | 22 | 0.045454545 |
| SOS1     | 1 | 0 | 0 | 0 | 0 | 1 | 22 | 0.045454545 |
| MIS18BP1 | 1 | 0 | 0 | 0 | 0 | 1 | 22 | 0.045454545 |
| METTL1   | 1 | 0 | 0 | 0 | 0 | 1 | 22 | 0.045454545 |
| RIN1     | 1 | 0 | 0 | 0 | 0 | 1 | 22 | 0.045454545 |
| SYNGR4   | 1 | 0 | 0 | 0 | 0 | 1 | 22 | 0.045454545 |
| SLC12A5  | 1 | 0 | 0 | 0 | 0 | 1 | 22 | 0.045454545 |
| C9orf3   | 1 | 0 | 0 | 0 | 0 | 1 | 22 | 0.045454545 |
| MAGEB18  | 1 | 0 | 0 | 0 | 0 | 1 | 22 | 0.045454545 |
| CD53     | 0 | 1 | 0 | 0 | 0 | 1 | 22 | 0.045454545 |
| KCTD1    | 0 | 1 | 0 | 0 | 0 | 1 | 22 | 0.045454545 |
| AUTS2    | 1 | 0 | 0 | 0 | 0 | 1 | 22 | 0.045454545 |
| MED4     | 1 | 0 | 0 | 0 | 0 | 1 | 22 | 0.045454545 |
| KALRN    | 1 | 0 | 0 | 0 | 0 | 1 | 22 | 0.045454545 |
| IL12B    | 1 | 0 | 0 | 0 | 0 | 1 | 22 | 0.045454545 |
| CNTNAP1  | 1 | 0 | 0 | 0 | 0 | 1 | 22 | 0.045454545 |
| OR52M1   | 1 | 0 | 0 | 0 | 0 | 1 | 22 | 0.045454545 |
| ODZ1     | 1 | 0 | 0 | 0 | 0 | 1 | 22 | 0.045454545 |
| BTN2A2   | 1 | 0 | 0 | 0 | 0 | 1 | 22 | 0.045454545 |
| SEC31B   | 1 | 0 | 0 | 0 | 0 | 1 | 22 | 0.045454545 |
| UBOX5    | 1 | 0 | 0 | 0 | 0 | 1 | 22 | 0.045454545 |
| GRIN2B   | 0 | 0 | 0 | 1 | 0 | 1 | 22 | 0.045454545 |
| TCEB3B   | 1 | 0 | 0 | 0 | 0 | 1 | 22 | 0.045454545 |
| GRHL1    | 1 | 0 | 0 | 0 | 0 | 1 | 22 | 0.045454545 |
| PRPF18   | 0 | 0 | 1 | 0 | 0 | 1 | 22 | 0.045454545 |
| CMPK2    | 1 | 0 | 0 | 0 | 0 | 1 | 22 | 0.045454545 |
| LTN1     | 0 | 0 | 0 | 1 | 0 | 1 | 22 | 0.045454545 |
| SLC38A11 | 1 | 0 | 0 | 0 | 0 | 1 | 22 | 0.045454545 |
| C10orf18 | 1 | 0 | 0 | 0 | 0 | 1 | 22 | 0.045454545 |
| DGKI     | 1 | 0 | 0 | 0 | 0 | 1 | 22 | 0.045454545 |
| ZNF419   | 1 | 0 | 0 | 0 | 0 | 1 | 22 | 0.045454545 |
| FSHR     | 1 | 0 | 0 | 0 | 0 | 1 | 22 | 0.045454545 |
| TF       | 1 | 0 | 0 | 0 | 0 | 1 | 22 | 0.045454545 |

|          |   |   |   |   |   |   |    |             |
|----------|---|---|---|---|---|---|----|-------------|
| TG       | 0 | 0 | 0 | 1 | 0 | 1 | 22 | 0.045454545 |
| VPS13A   | 0 | 1 | 0 | 0 | 0 | 1 | 22 | 0.045454545 |
| DGKG     | 1 | 0 | 0 | 0 | 0 | 1 | 22 | 0.045454545 |
| HSD11B1  | 1 | 0 | 0 | 0 | 0 | 1 | 22 | 0.045454545 |
| DPY19L3  | 1 | 0 | 0 | 0 | 0 | 1 | 22 | 0.045454545 |
| TRAF7    | 1 | 0 | 0 | 0 | 0 | 1 | 22 | 0.045454545 |
| ORC6     | 1 | 0 | 0 | 0 | 0 | 1 | 22 | 0.045454545 |
| MMP9     | 1 | 0 | 0 | 0 | 0 | 1 | 22 | 0.045454545 |
| ACAP1    | 0 | 0 | 0 | 0 | 1 | 1 | 22 | 0.045454545 |
| PTGIS    | 1 | 0 | 0 | 0 | 0 | 1 | 22 | 0.045454545 |
| KIAA1432 | 0 | 1 | 0 | 0 | 0 | 1 | 22 | 0.045454545 |
| ARMC4    | 1 | 0 | 0 | 0 | 0 | 1 | 22 | 0.045454545 |
| RASA2    | 0 | 0 | 0 | 1 | 0 | 1 | 22 | 0.045454545 |
| C20orf85 | 1 | 0 | 0 | 0 | 0 | 1 | 22 | 0.045454545 |
| PLEKHG1  | 0 | 1 | 0 | 0 | 0 | 1 | 22 | 0.045454545 |
| PREX1    | 0 | 1 | 0 | 0 | 0 | 1 | 22 | 0.045454545 |
| AMTN     | 1 | 0 | 0 | 0 | 0 | 1 | 22 | 0.045454545 |
| PTPRD    | 1 | 0 | 0 | 0 | 0 | 1 | 22 | 0.045454545 |
| PTPRC    | 0 | 0 | 1 | 0 | 0 | 1 | 22 | 0.045454545 |
| PTPRM    | 1 | 0 | 0 | 0 | 0 | 1 | 22 | 0.045454545 |
| PTPRH    | 0 | 1 | 0 | 0 | 0 | 1 | 22 | 0.045454545 |

---
