# Supplementary material for: Novel recurrently mutated genes and a prognostic mutation signature in colorectal cancer
Source: HighWire-hosted journal article supplement (doi:10.1136/gutjnl-2013-306620), 2014-06-20
Supplement: gutjnl-2013-306620supp_tableS5.pdf [file gutjnl-2013-306620supp_tableS5.pdf]

**Table S5.** Patients information of 160 colorectal cancer tissues analyzed for targeted capture sequencing.

| Sample | Gender | Age | Localisation | Differentiation | TNM.stage | TNM | Status | Operation.date | Date last seen | Survival   |
|--------|--------|-----|--------------|-----------------|-----------|-----|--------|----------------|----------------|------------|
| P1     | F      | 70  | 2            | 2               | T3N2M0    | 3   | Alive  | 2/20/2009      | 8/15/2012      | 42.4       |
| P2     | M      | 77  | 2            | 2               | T3N0M0    | 2   | Alive  | 5/14/2009      | 8/7/2012       | 39.3666667 |
| P3     | M      | 45  | 2            | 2               | T4N2M1    | 4   | Alive  | 5/25/2010      | 9/8/2012       | 27.9       |
| P4     | F      | 54  | 2            | 2               | T4N1M1    | 4   | Alive  | 6/2/2010       | 8/16/2011      | 14.6666667 |
| P5     | M      | 62  | 2            | 2               | T4N0M0    | 2   | Alive  | 6/8/2010       | 8/16/2011      | 14.4666667 |
| P6     | F      | 54  | 2            | 3               | T3N0M0    | 2   | Alive  | 6/17/2010      | 8/16/2011      | 14.1666667 |
| P7     | M      | 72  | 1            | 2               | T3N2M0    | 3   | Alive  | 6/18/2010      | 8/30/2012      | 26.8       |
| P8     | F      | 75  | 2            | 2               | T3N0M0    | 2   | Alive  | 6/25/2010      | 7/25/2012      | 25.3666667 |
| P9     | M      | 79  | 1            | 2               | T3N0M0    | 2   | Alive  | 11/8/2004      | 7/11/2012      | 93.4       |
| P10    | F      | 70  | 2            | 2               | T2N0M0    | 1   | Alive  | 5/22/2009      | 9/3/2012       | 40         |
| P11    | M      | 59  | 1            | 2               | T3N0M0    | 2   | Alive  | 7/9/2010       | 8/10/2012      | 25.4333333 |
| P12    | M      | 69  | 2            | 2               | T3N0M0    | 2   | Alive  | 7/22/2010      | 8/28/2012      | 25.6       |
| P13    | M      | 68  | 2            | 2               | T3N1M0    | 3   | Alive  | 7/22/2010      | 8/23/2012      | 25.4333333 |
| P14    | M      | 78  | 2            | 2               | T3N0M0    | 2   | Alive  | 7/23/2010      | 7/11/2012      | 23.9666667 |
| P15    | F      | 43  | 2            | 2               | T3N0M0    | 2   | Alive  | 7/23/2010      | 7/11/2012      | 23.9666667 |
| P16    | F      | 59  | 2            | 2               | T3N1M0    | 3   | Alive  | 1/3/2005       | 8/21/2012      | 92.9       |
| P17    | F      | 65  | 2            | 2               | T4N2M1    | 4   | Died   | 1/6/2005       | 6/17/2006      | 17.5666667 |
| P18    | F      | 65  | 2            | 2               | T3N1M0    | 2   | Alive  | 1/6/2005       | 8/14/2012      | 92.5666667 |
| P19    | M      | 68  | 2            | 2               | T3N0M0    | 2   | Alive  | 6/11/2009      | 9/3/2012       | 39.3333333 |
| P20    | M      | 55  | 1            | 2               | T4N0M1    | 4   | Died   | 1/7/2005       | 4/25/2006      | 15.7666667 |
| P21    | M      | 69  | 2            | 2               | T4N2M0    | 2   | Died   | 1/10/2005      | 11/22/2011     | 83.5666667 |
| P22    | F      | 50  | 2            | 2               | T3N0M0    | 2   | Alive  | 1/14/2005      | 6/3/2008       | 41.2       |
| P23    | M      | 84  | 2            | 2               | T3N0M0    | 2   | Died   | 1/14/2005      | 3/26/2005      | 2.3666667  |
| P24    | F      | 52  | 2            | 1               | T3N1M0    | 3   | Died   | 1/20/2005      | 4/8/2006       | 14.7666667 |
| P25    | M      | 77  | 2            | 2               | T3N0M0    | 2   | Died   | 1/21/2005      | 3/6/2008       | 38         |
| P26    | M      | 69  | 2            | 2               | T3N2M0    | 3   | Alive  | 1/27/2005      | 6/7/2012       | 89.6       |
| P27    | F      | 61  | 2            | 2               | T3N0M0    | 2   | Alive  | 2/7/2005       | 8/8/2012       | 91.3       |
| P28    | F      | 48  | 2            | 2               | T3N1M1    | 4   | Dead   | 6/18/2009      | 6/9/2011       | 24.0333333 |
| P29    | M      | 68  | 2            | 2               | T3N1M0    | 3   | Alive  | 2/17/2005      | 6/18/2012      | 89.2666667 |
| P30    | M      | 57  | 2            | 2               | T3N0M0    | 2   | Alive  | 2/17/2005      | 7/10/2012      | 90         |
| P31    | F      | 83  | 2            | 2               | T3N0M0    | 2   | Alive  | 2/24/2005      | 6/19/2012      | 89.0666667 |
| P32    | M      | 53  | 2            | 2               | T3N2M1    | 4   | Alive  | 3/10/2005      | 8/28/2012      | 90.9333333 |
| P33    | M      | 84  | 1            | 2               | T3N1M0    | 3   | Died   | 3/11/2005      | 3/26/2011      | 73.5333333 |

|     |   |    |   |   |        |   |       |            |            |            |
|-----|---|----|---|---|--------|---|-------|------------|------------|------------|
| P34 | M | 79 | 1 | 2 | T3N2M1 | 4 | Died  | 3/11/2005  | 9/15/2005  | 6.26666667 |
| P35 | F | 74 | 2 | 2 | T3N0M0 | 2 | Died  | 3/17/2005  | 6/19/2007  | 27.4666667 |
| P36 | M | 52 | 2 | 2 | T3N1M0 | 3 | Alive | 3/21/2005  | 3/12/2012  | 84.9333333 |
| P37 | M | 63 | 2 | 2 | T3N2M0 | 3 | Alive | 3/24/2005  | 8/24/2012  | 90.3333333 |
| P38 | M | 70 | 2 | 2 | T4N2M0 | 3 | Died  | 4/14/2005  | 12/24/2005 | 8.46666667 |
| P39 | F | 84 | 2 | 2 | T1N0M0 | 1 | Died  | 4/14/2005  | 10/13/2008 | 42.6       |
| P40 | F | 65 | 2 | 2 | T3N1M0 | 3 | Alive | 4/15/2005  | 6/18/2012  | 87.3666667 |
| P41 | F | 73 | 2 | 2 | T4N2M1 | 4 | Died  | 4/15/2005  | 5/28/2006  | 13.6       |
| P42 | M | 78 | 1 | 2 | T3N0M0 | 2 | Alive | 4/18/2005  | 9/3/2012   | 89.8333333 |
| P43 | M | 80 | 2 | 2 | T3N0M0 | 2 | Alive | 4/21/2005  | 8/28/2012  | 89.5333333 |
| P44 | M | 56 | 2 | 2 | T3N2M0 | 3 | Died  | 4/25/2005  | 7/27/2007  | 27.4333333 |
| P45 | M | 78 | 2 | 2 | T3N0M0 | 2 | Alive | 4/28/2005  | 9/3/2012   | 89.5       |
| P46 | M | 57 | 2 | 2 | T3N0M0 | 2 | Alive | 6/25/2009  | 8/28/2012  | 38.6666667 |
| P47 | M | 53 | 2 | 2 | T3N0M0 | 2 | Alive | 5/5/2005   | 6/11/2012  | 86.4666667 |
| P48 | M | 67 | 2 | 2 | T3N1M0 | 3 | Alive | 5/5/2005   | 12/28/2009 | 56.6       |
| P49 | M | 73 | 2 | 2 | T3N2M1 | 4 | Died  | 3/14/2005  | 10/9/2005  | 6.96666667 |
| P50 | M | 66 | 2 | 2 | T4N0M0 | 2 | Alive | 12/1/1999  | 7/27/2012  | 154.066667 |
| P51 | M | 48 | 2 | 2 | T3N1M0 | 3 | Alive | 2/27/2001  | 6/13/2012  | 137.466667 |
| P52 | M | 43 | 2 | 2 | T3N2M0 | 3 | Alive | 3/14/2001  | 9/4/2012   | 139.733333 |
| P53 | M | 46 | 2 | 2 | T3N2M0 | 3 | Dead  | 3/19/2001  | 10/27/2002 | 19.5666667 |
| P54 | F | 66 | 2 | 2 | T3N1M0 | 3 | Dead  | 3/22/2001  | 4/14/2005  | 49.4666667 |
| P55 | M | 56 | 2 | 2 | T3N1M0 | 3 | Dead  | 7/3/2001   | 5/29/2005  | 47.5333333 |
| P56 | M | 73 | 2 | 2 | T3N2M0 | 3 | Dead  | 7/4/2001   | 10/5/2002  | 15.2666667 |
| P57 | M | 59 | 2 | 2 | T3N1M0 | 3 | Alive | 8/8/2001   | 6/15/2012  | 132.133333 |
| P58 | M | 70 | 2 | 2 | T3N0M0 | 2 | Alive | 10/18/2001 | 7/24/2012  | 131.066667 |
| P59 | M | 60 | 2 | 2 | T3N0M0 | 2 | Alive | 11/8/2001  | 8/20/2012  | 131.266667 |
| P60 | M | 72 | 1 | 2 | T3N0M1 | 4 | Dead  | 7/10/2009  | 9/1/2009   | 1.76666667 |
| P61 | M | 70 | 2 | 2 | T3N0M0 | 2 | Alive | 12/5/2001  | 8/30/2012  | 130.7      |
| P62 | M | 69 | 2 | 2 | T3N2M0 | 3 | Alive | 2/1/2002   | 7/12/2012  | 127.133333 |
| P63 | F | 79 | 2 | 2 | T3N0M0 | 2 | Alive | 3/18/2002  | 6/11/2012  | 124.6      |
| P64 | M | 72 | 2 | 2 | T2N0M0 | 1 | Alive | 6/14/2002  | 8/21/2012  | 124.033333 |
| P65 | M | 68 | 2 | 2 | T3N0M0 | 2 | Alive | 7/4/2002   | 7/25/2012  | 122.466667 |
| P66 | M | 73 | 2 | 2 | T3N2M0 | 3 | Dead  | 7/8/2002   | 7/27/2006  | 49.3333333 |
| P67 | M | 87 | 2 | 2 | T3N0M0 | 2 | Alive | 8/6/2002   | 8/24/2012  | 122.366667 |
| P68 | M | 64 | 2 | 2 | T3N1M0 | 3 | Alive | 8/29/2002  | 7/10/2012  | 120.1      |
| P69 | M | 70 | 2 | 2 | T3N0M0 | 2 | Alive | 7/16/2009  | 8/14/2012  | 37.5       |
| P70 | M | 66 | 2 | 2 | T3N0M0 | 2 | Alive | 9/12/2002  | 8/10/2012  | 120.666667 |

|      |   |    |   |   |        |   |       |            |           |            |
|------|---|----|---|---|--------|---|-------|------------|-----------|------------|
| P71  | F | 76 | 2 | 2 | T3N1M0 | 3 | Dead  | 9/30/2002  | 11/9/2008 | 74.4       |
| P72  | F | 79 | 2 | 2 | T2N0M0 | 1 | Alive | 10/7/2002  | 9/3/2012  | 120.633333 |
| P73  | F | 68 | 2 | 2 | T3N2M0 | 3 | Alive | 10/14/2002 | 8/13/2012 | 119.7      |
| P74  | F | 73 | 2 | 2 | T3N0M0 | 2 | Alive | 1/23/2003  | 8/20/2012 | 116.566667 |
| P75  | F | 85 | 2 | 2 | T3N0M0 | 2 | Dead  | 1/27/2003  | 8/16/2007 | 55.4       |
| P76  | F | 39 | 2 | 2 | T3N1M0 | 3 | Alive | 2/13/2003  | 3/27/2012 | 111        |
| P77  | M | 71 | 2 | 2 | T3N0M0 | 2 | Alive | 2/20/2003  | 7/31/2012 | 114.966667 |
| P78  | F | 54 | 2 | 2 | T3N1M0 | 3 | Alive | 7/16/2009  | 5/21/2012 | 34.666667  |
| P79  | M | 53 | 2 | 2 | T3N1M0 | 3 | Dead  | 2/21/2003  | 12/8/2009 | 82.733333  |
| P80  | F | 81 | 2 | 2 | T3N1M0 | 3 | Dead  | 6/16/2003  | 9/17/2010 | 88.333333  |
| P81  | M | 65 | 2 | 2 | T2N0M0 | 1 | Alive | 7/9/2003   | 5/8/2012  | 107.533333 |
| P82  | M | 74 | 1 | 2 | T2N1M0 | 3 | Alive | 5/6/2009   | 7/27/2012 | 39.266667  |
| P83  | F | 70 | 2 | 2 | T2N0M0 | 1 | Alive | 5/20/2009  | 9/3/2012  | 40.066667  |
| P84  | F | 73 | 1 | 2 | T4N1M0 | 3 | Alive | 6/17/2009  | 8/30/2012 | 39         |
| P85  | M | 70 | 2 | 2 | T3N0M0 | 2 | Alive | 7/15/2009  | 8/14/2012 | 37.533333  |
| P86  | F | 54 | 2 | 2 | T3N0M0 | 2 | Alive | 7/16/2009  | 8/16/2012 | 37.566667  |
| P87  | F | 71 | 1 | 2 | T3N1M1 | 4 | Dead  | 9/2/2009   | 10/5/2012 | 37.633333  |
| P88  | M | 80 | 2 | 2 | T1N0M0 | 1 | Alive | 1/20/2010  | 8/29/2012 | 31.733333  |
| P89  | M | 55 | 2 | 2 | T3N1M1 | 4 | Alive | 1/27/2010  | 8/31/2012 | 31.566667  |
| P90  | M | 73 | 1 | 2 | T3N0M0 | 2 | Alive | 2/4/2010   | 8/20/2012 | 30.933333  |
| P91  | F | 64 | 1 | 2 | T4N2M1 | 4 | Dead  | 3/18/2010  | 9/5/2011  | 17.866667  |
| P92  | F | 50 | 2 | 2 | T1N0M0 | 1 | Alive | 7/30/2009  | 7/31/2012 | 36.566667  |
| P93  | M | 71 | 2 | 2 | T1N1M0 | 3 | Alive | 8/20/2009  | 8/27/2012 | 36.766667  |
| P94  | F | 79 | 2 | 2 | T4N2M0 | 3 | Alive | 3/26/2010  | 9/3/2012  | 29.733333  |
| P95  | M | 74 | 2 | 2 | T3N0M0 | 2 | Alive | 4/1/2010   | 8/28/2012 | 29.333333  |
| P96  | M | 76 | 2 | 2 | T3N1M0 | 3 | Alive | 2/20/2009  | 3/15/2012 | 37.3       |
| P97  | M | 78 | 2 | 2 | T3N0M0 | 2 | Alive | 4/16/2010  | 7/30/2012 | 27.866667  |
| P98  | M | 63 | 2 | 2 | T3N2M1 | 4 | Alive | 4/22/2010  | 7/31/2012 | 27.7       |
| P99  | F | 77 | 2 | 2 | T3N0M0 | 2 | Dead  | 4/23/2010  | 5/26/2012 | 25.466667  |
| P100 | M | 40 | 2 | 2 | T3N1M0 | 3 | Alive | 4/29/2010  | 8/14/2012 | 27.933333  |
| P101 | F | 68 | 2 | 2 | T4N0M0 | 2 | Alive | 5/7/2010   | 7/17/2012 | 26.733333  |
| P102 | M | 83 | 1 | 2 | T3N0M0 | 2 | Alive | 5/7/2010   | 8/20/2012 | 27.866667  |
| P103 | M | 74 | 2 | 2 | T1N0M0 | 1 | Alive | 5/13/2010  | 5/29/2012 | 24.9       |
| P104 | F | 75 | 2 | 2 | T3N0M0 | 2 | Alive | 5/14/2010  | 7/17/2012 | 26.5       |
| P105 | M | 76 | 2 | 2 | T3N0M0 | 2 | Alive | 5/28/2010  | 5/30/2012 | 24.433333  |
| P106 | F | 68 | 2 | 2 | T3N1M0 | 3 | Alive | 7/29/2002  | 7/10/2012 | 121.133333 |
| P107 | M | 80 | 2 | 2 | T3N1M0 | 3 | Dead  | 3/6/2009   | 7/5/2012  | 40.566667  |

|      |   |    |   |   |        |   |       |            |            |            |
|------|---|----|---|---|--------|---|-------|------------|------------|------------|
| P108 | F | 42 | 1 | 2 | T3N0M0 | 2 | Alive | 9/15/2006  | 6/5/2012   | 69.6666667 |
| P109 | M | 78 | 1 | 2 | T3N0M0 | 2 | Alive | 7/20/2006  | 8/13/2012  | 73.8666667 |
| P110 | F | 64 | 1 | 2 | T3N0M0 | 2 | Alive | 8/8/2002   | 8/6/2012   | 121.7      |
| P111 | F | 54 | 2 | 2 | T3N1M0 | 3 | Alive | 9/7/2000   | 8/25/2012  | 145.666667 |
| P112 | F | 71 | 1 | 2 | T3N1M0 | 3 | Alive | 5/28/2010  | 8/20/2012  | 27.1666667 |
| P113 | F | 92 | 2 | 2 | T3N0M0 | 2 | Alive | 6/3/2010   | 8/17/2010  | 2.5        |
| P114 | M | 48 | 1 | 2 | T3N0M0 | 2 | Alive | 6/3/2010   | 9/4/2012   | 27.4666667 |
| P115 | F | 80 | 1 | 2 | T3N0M0 | 2 | Alive | 6/4/2010   | 8/21/2012  | 26.9666667 |
| P116 | M | 61 | 2 | 2 | T2N1M0 | 3 | Alive | 6/10/2010  | 8/15/2012  | 26.5666667 |
| P117 | M | 45 | 1 | 2 | T3N0M0 | 2 | Alive | 6/11/2010  | 9/3/2012   | 27.1666667 |
| P118 | M | 58 | 2 | 2 | T3N1M0 | 3 | Alive | 3/5/2009   | 6/2/2012   | 39.5       |
| P119 | F | 72 | 1 | 2 | T3N0M0 | 2 | Dead  | 6/17/2010  | 12/11/2011 | 18.0666667 |
| P120 | M | 50 | 2 | 3 | T3N1M1 | 4 | Dead  | 1/8/2004   | 7/10/2008  | 54.8333333 |
| P121 | M | 73 | 2 | 2 | T3N1M0 | 3 | Dead  | 4/28/2004  | 5/29/2004  | 1.03333333 |
| P122 | M | 87 | 2 | 2 | T3N0M0 | 2 | Dead  | 5/18/2004  | 11/9/2008  | 54.5333333 |
| P123 | M | 56 | 2 | 2 | T3N0M0 | 2 | Dead  | 6/15/2004  | 11/9/2008  | 53.6       |
| P124 | F | 66 | 2 | 3 | T3N1M0 | 3 | Alive | 6/17/2004  | 9/8/2012   | 100.166667 |
| P125 | M | 70 | 1 | 2 | T3N1M0 | 3 | Alive | 3/19/2009  | 8/27/2012  | 41.9       |
| P126 | M | 69 | 1 | 2 | T3N1M0 | 3 | Alive | 7/1/2004   | 9/8/2012   | 99.7       |
| P127 | M | 64 | 2 | 2 | T3N1M0 | 3 | Dead  | 10/27/2004 | 6/10/2010  | 68.4       |
| P128 | M | 79 | 2 | 2 | T2N0M0 | 1 | Alive | 11/3/2004  | 9/8/2012   | 95.5333333 |
| P129 | M | 47 | 1 | 2 | T3N0M0 | 2 | Alive | 11/17/2004 | 9/8/2012   | 95.0666667 |
| P130 | F | 32 | 2 | 2 | T3N1M0 | 3 | Alive | 12/1/2004  | 9/8/2012   | 94.6       |
| P131 | F | 56 | 2 | 2 | T3N0M1 | 4 | Dead  | 2/3/2005   | 12/29/2007 | 35.3       |
| P132 | F | 41 | 2 | 2 | T4N1M1 | 4 | Loss  | 3/17/2005  | NN         |            |
| P133 | M | 69 | 1 | 1 | T3N0M0 | 2 | Alive | 3/13/2005  | 9/8/2012   | 91.2       |
| P134 | M | 56 | 2 | 1 | T1N0M0 | 1 | Alive | 3/13/2005  | 9/8/2012   | 91.2       |
| P135 | M | 56 | 1 | 2 | T3N1M0 | 3 | Loss  | 4/20/2005  | NN         |            |
| P136 | F | 78 | 2 | 3 | T3N2M1 | 4 | Dead  | 5/11/2005  | 10/1/2005  | 4.76666667 |
| P137 | M | 68 | 1 | 2 | T3N0M0 | 2 | Alive | 6/16/2005  | 9/8/2012   | 88.0333333 |
| P138 | F | 60 | 2 | 2 | T3N1M1 | 4 | Dead  | 6/22/2005  | 11/12/2006 | 16.9333333 |
| P139 | F | 33 | 2 | 3 | T3N2M1 | 4 | Dead  | 6/22/2005  | 4/1/2006   | 9.43333333 |
| P140 | M | 48 | 1 | 2 | T3N0M0 | 2 | Loss  | 8/17/2005  | 10/11/2010 | 62.7       |
| P141 | M | 73 | 2 | 1 | T4N0M0 | 2 | Alive | 9/20/2005  | 9/8/2012   | 84.8333333 |
| P142 | M | 64 | 2 | 2 | T3N1M0 | 3 | Alive | 9/28/2005  | 9/8/2012   | 84.5666667 |
| P143 | M | 33 | 2 | 2 | T3N1M0 | 3 | Alive | 9/28/2005  | 8/20/2012  | 83.9333333 |
| P144 | M | 51 | 2 | 2 | T3N0M0 | 2 | Alive | 4/30/2009  | 8/31/2012  | 40.6333333 |

|      |   |    |   |   |        |   |       |            |           |            |
|------|---|----|---|---|--------|---|-------|------------|-----------|------------|
| P145 | F | 57 | 2 | 2 | T2N0M0 | 1 | Alive | 10/25/2005 | 9/8/2012  | 83.6666667 |
| P146 | F | 49 | 2 | 2 | T3N0M1 | 4 | Dead  | 10/25/2005 | 10/1/2010 | 60.0666667 |
| P147 | F | 64 | 2 | 2 | T3N0M0 | 2 | Alive | 11/2/2005  | 9/8/2012  | 83.4       |
| P148 | M | 51 | 2 | 2 | T3N2M0 | 3 | Alive | 11/10/2005 | 9/8/2012  | 83.1333333 |
| P149 | M | 51 | 2 | 2 | T2N1M0 | 3 | Alive | 11/16/2005 | 9/8/2012  | 82.9333333 |
| P150 | M | 69 | 2 | 2 | T3N1M0 | 3 | Alive | 11/17/2005 | 9/8/2012  | 82.9       |
| P151 | F | 78 | 1 | 2 | T4N0M0 | 2 | Alive | 11/23/2005 | 9/8/2012  | 82.7       |
| P152 | F | 68 | 2 | 2 | T2N0M0 | 1 | Loss  | 11/30/2005 | NN        |            |
| P153 | F | 70 | 2 | 2 | T3N0M0 | 2 | Alive | 12/14/2005 | 9/8/2012  | 82         |
| P154 | M | 74 | 1 | 2 | T2N1M0 | 3 | Alive | 5/7/2009   | 7/27/2012 | 39.2333333 |
| P155 | F | 75 | 2 | 2 | T3N0M0 | 2 | Alive | 12/28/2005 | 9/8/2012  | 81.5333333 |
| P156 | F | 53 | 2 | 2 | T3N1M0 | 3 | Alive | 3/1/2006   | 9/8/2012  | 79.4333333 |
| P157 | M | 71 | 2 | 2 | T3N1M0 | 3 | Alive | 3/2/2006   | 9/8/2012  | 79.4       |
| P158 | F | 43 | 2 | 2 | T3N0M0 | 2 | Alive | 3/8/2006   | 9/8/2012  | 79.2       |
| P159 | M | 68 | 2 | 2 | T3N1M0 | 3 | Dead  | 3/9/2006   | 7/16/2009 | 40.8333333 |
| P160 | F | 76 | 2 | 2 | T3N2M0 | 3 | Loss  | 3/22/2006  | NN        |            |
