# Supplementary material for: Novel recurrently mutated genes and a prognostic mutation signature in colorectal cancer
Source: HighWire-hosted journal article supplement (doi:10.1136/gutjnl-2013-306620), 2014-06-20
Supplement: gutjnl-2013-306620supp_tableS6.pdf [file gutjnl-2013-306620supp_tableS6.pdf]

**Table S6.** Distribution of somatic mutations identified in 160 human colorectal detected by targeted capture sequencing.

| sample | syn | missense | nonsense | splicing | frameshift_indel | nonframeshift_indel | Total |
|--------|-----|----------|----------|----------|------------------|---------------------|-------|
| P1     | 0   | 0        | 0        | 0        | 1                | 0                   | 1     |
| P2     | 2   | 5        | 1        | 0        | 2                | 0                   | 10    |
| P3     | 3   | 3        | 1        | 0        | 0                | 0                   | 7     |
| P4     | 0   | 1        | 0        | 0        | 0                | 0                   | 1     |
| P5     | 0   | 1        | 0        | 0        | 0                | 0                   | 1     |
| P6     | 0   | 3        | 1        | 0        | 1                | 0                   | 5     |
| P7     | 2   | 8        | 1        | 0        | 0                | 0                   | 11    |
| P8     | 3   | 3        | 0        | 0        | 0                | 0                   | 6     |
| P9     | 10  | 25       | 1        | 0        | 1                | 1                   | 38    |
| P10    | 1   | 4        | 2        | 0        | 0                | 0                   | 7     |
| P11    | 0   | 6        | 0        | 0        | 2                | 0                   | 8     |
| P12    | 5   | 19       | 1        | 1        | 0                | 1                   | 27    |
| P13    | 2   | 12       | 1        | 0        | 3                | 1                   | 19    |
| P14    | 1   | 0        | 1        | 0        | 1                | 0                   | 3     |
| P15    | 1   | 5        | 0        | 0        | 2                | 0                   | 8     |
| P16    | 1   | 1        | 0        | 0        | 0                | 0                   | 2     |
| P17    | 0   | 1        | 0        | 0        | 0                | 0                   | 1     |
| P18    | 1   | 3        | 1        | 0        | 0                | 0                   | 5     |
| P19    | 1   | 0        | 0        | 1        | 0                | 0                   | 2     |
| P20    | 0   | 6        | 3        | 0        | 0                | 0                   | 9     |
| P21    | 0   | 8        | 0        | 0        | 2                | 0                   | 10    |
| P22    | 0   | 3        | 1        | 0        | 0                | 0                   | 4     |
| P23    | 1   | 4        | 0        | 0        | 1                | 0                   | 6     |
| P24    | 1   | 0        | 0        | 0        | 0                | 0                   | 1     |
| P25    | 2   | 2        | 2        | 1        | 0                | 0                   | 7     |
| P26    | 1   | 2        | 2        | 0        | 0                | 0                   | 5     |
| P27    | 2   | 3        | 0        | 1        | 0                | 0                   | 6     |
| P28    | 2   | 4        | 0        | 0        | 0                | 0                   | 6     |
| P29    | 0   | 1        | 1        | 0        | 1                | 0                   | 3     |
| P30    | 3   | 5        | 1        | 1        | 1                | 0                   | 11    |
| P31    | 1   | 5        | 1        | 0        | 1                | 0                   | 8     |
| P32    | 2   | 1        | 0        | 0        | 0                | 0                   | 3     |
| P33    | 0   | 1        | 1        | 0        | 0                | 0                   | 2     |

|     |   |    |   |   |   |   |    |
|-----|---|----|---|---|---|---|----|
| P34 | 0 | 15 | 2 | 0 | 1 | 0 | 18 |
| P35 | 2 | 2  | 1 | 0 | 0 | 0 | 5  |
| P36 | 3 | 1  | 0 | 0 | 1 | 0 | 5  |
| P37 | 1 | 9  | 0 | 0 | 1 | 0 | 11 |
| P38 | 1 | 5  | 0 | 2 | 1 | 0 | 9  |
| P39 | 2 | 4  | 1 | 0 | 0 | 0 | 7  |
| P40 | 3 | 5  | 1 | 0 | 2 | 0 | 11 |
| P41 | 4 | 5  | 1 | 0 | 2 | 0 | 12 |
| P42 | 2 | 6  | 1 | 0 | 0 | 0 | 9  |
| P43 | 0 | 6  | 1 | 1 | 2 | 0 | 10 |
| P44 | 2 | 1  | 1 | 2 | 0 | 0 | 6  |
| P45 | 0 | 4  | 2 | 0 | 1 | 0 | 7  |
| P46 | 6 | 16 | 0 | 1 | 1 | 1 | 25 |
| P47 | 4 | 4  | 1 | 0 | 1 | 0 | 10 |
| P48 | 2 | 7  | 2 | 0 | 0 | 0 | 11 |
| P49 | 0 | 0  | 0 | 1 | 1 | 0 | 2  |
| P50 | 0 | 5  | 2 | 0 | 1 | 0 | 8  |
| P51 | 0 | 2  | 0 | 0 | 1 | 0 | 3  |
| P52 | 2 | 1  | 0 | 0 | 0 | 0 | 3  |
| P53 | 0 | 2  | 0 | 0 | 1 | 0 | 3  |
| P54 | 1 | 0  | 0 | 0 | 0 | 0 | 1  |
| P55 | 0 | 0  | 0 | 0 | 0 | 0 | 0  |
| P56 | 1 | 2  | 2 | 0 | 1 | 0 | 6  |
| P57 | 1 | 4  | 1 | 0 | 0 | 1 | 7  |
| P58 | 1 | 1  | 1 | 0 | 1 | 0 | 4  |
| P59 | 0 | 2  | 0 | 0 | 2 | 0 | 4  |
| P60 | 8 | 10 | 2 | 0 | 0 | 0 | 20 |
| P61 | 0 | 5  | 0 | 0 | 0 | 0 | 5  |
| P62 | 3 | 4  | 1 | 0 | 0 | 0 | 8  |
| P63 | 1 | 1  | 0 | 0 | 0 | 0 | 2  |
| P64 | 0 | 2  | 1 | 0 | 0 | 0 | 3  |
| P65 | 0 | 1  | 1 | 0 | 0 | 0 | 2  |
| P66 | 1 | 3  | 0 | 0 | 0 | 0 | 4  |
| P67 | 0 | 5  | 0 | 0 | 1 | 0 | 6  |
| P68 | 0 | 3  | 2 | 1 | 0 | 0 | 6  |
| P69 | 0 | 1  | 0 | 0 | 0 | 0 | 1  |
| P70 | 1 | 2  | 0 | 0 | 1 | 1 | 5  |

|      |     |     |    |   |   |   |     |
|------|-----|-----|----|---|---|---|-----|
| P71  | 3   | 4   | 0  | 0 | 1 | 0 | 8   |
| P72  | 0   | 4   | 1  | 0 | 0 | 0 | 5   |
| P73  | 0   | 4   | 0  | 1 | 0 | 0 | 5   |
| P74  | 1   | 2   | 1  | 1 | 0 | 0 | 5   |
| P75  | 4   | 2   | 0  | 1 | 3 | 0 | 10  |
| P76  | 0   | 2   | 0  | 0 | 0 | 0 | 2   |
| P77  | 1   | 5   | 3  | 0 | 1 | 0 | 10  |
| P78  | 0   | 0   | 0  | 0 | 0 | 0 | 0   |
| P79  | 1   | 2   | 1  | 0 | 0 | 0 | 4   |
| P80  | 1   | 5   | 1  | 0 | 0 | 0 | 7   |
| P81  | 0   | 1   | 1  | 0 | 1 | 1 | 4   |
| P82  | 0   | 4   | 2  | 0 | 1 | 0 | 7   |
| P83  | 1   | 4   | 2  | 0 | 0 | 0 | 7   |
| P84  | 0   | 3   | 0  | 0 | 0 | 0 | 3   |
| P85  | 8   | 12  | 0  | 0 | 0 | 0 | 20  |
| P86  | 0   | 3   | 1  | 0 | 1 | 0 | 5   |
| P87  | 0   | 0   | 0  | 0 | 0 | 0 | 0   |
| P88  | 0   | 1   | 1  | 0 | 0 | 0 | 2   |
| P89  | 1   | 4   | 1  | 1 | 0 | 0 | 7   |
| P90  | 0   | 0   | 0  | 0 | 0 | 0 | 0   |
| P91  | 1   | 4   | 0  | 0 | 1 | 0 | 6   |
| P92  | 0   | 0   | 0  | 0 | 0 | 0 | 0   |
| P93  | 1   | 2   | 0  | 0 | 0 | 0 | 3   |
| P94  | 0   | 2   | 0  | 0 | 0 | 0 | 2   |
| P95  | 0   | 4   | 2  | 0 | 0 | 0 | 6   |
| P96  | 2   | 2   | 2  | 0 | 1 | 0 | 7   |
| P97  | 1   | 5   | 0  | 1 | 0 | 0 | 7   |
| P98  | 1   | 5   | 2  | 0 | 1 | 0 | 9   |
| P99  | 0   | 1   | 1  | 0 | 1 | 0 | 3   |
| P100 | 125 | 383 | 43 | 5 | 1 | 0 | 557 |
| P101 | 0   | 5   | 0  | 0 | 0 | 0 | 5   |
| P102 | 1   | 1   | 0  | 0 | 1 | 0 | 3   |
| P103 | 2   | 6   | 1  | 0 | 2 | 0 | 11  |
| P104 | 0   | 5   | 2  | 1 | 0 | 0 | 8   |
| P105 | 1   | 3   | 1  | 0 | 1 | 0 | 6   |
| P106 | 0   | 4   | 1  | 0 | 0 | 0 | 5   |
| P107 | 0   | 0   | 0  | 0 | 0 | 0 | 0   |

|      |    |     |   |   |    |   |     |
|------|----|-----|---|---|----|---|-----|
| P108 | 9  | 18  | 1 | 0 | 5  | 0 | 33  |
| P109 | 3  | 5   | 1 | 0 | 0  | 0 | 9   |
| P110 | 6  | 25  | 1 | 1 | 9  | 0 | 42  |
| P111 | 0  | 6   | 2 | 0 | 0  | 0 | 8   |
| P112 | 1  | 4   | 1 | 0 | 0  | 0 | 6   |
| P113 | 1  | 5   | 0 | 1 | 0  | 0 | 7   |
| P114 | 2  | 2   | 1 | 0 | 0  | 0 | 5   |
| P115 | 1  | 1   | 0 | 0 | 0  | 0 | 2   |
| P116 | 1  | 4   | 1 | 1 | 0  | 0 | 7   |
| P117 | 11 | 17  | 1 | 2 | 7  | 1 | 39  |
| P118 | 0  | 4   | 0 | 0 | 0  | 0 | 4   |
| P119 | 0  | 0   | 0 | 0 | 0  | 0 | 0   |
| P120 | 0  | 0   | 0 | 0 | 0  | 0 | 0   |
| P121 | 0  | 0   | 0 | 0 | 0  | 0 | 0   |
| P122 | 1  | 4   | 1 | 0 | 0  | 0 | 6   |
| P123 | 0  | 0   | 0 | 0 | 0  | 0 | 0   |
| P124 | 0  | 1   | 0 | 0 | 0  | 0 | 1   |
| P125 | 1  | 3   | 0 | 0 | 0  | 0 | 4   |
| P126 | 0  | 3   | 1 | 0 | 0  | 1 | 5   |
| P127 | 0  | 0   | 0 | 0 | 0  | 0 | 0   |
| P128 | 1  | 0   | 0 | 0 | 0  | 0 | 1   |
| P129 | 4  | 12  | 0 | 1 | 0  | 2 | 19  |
| P130 | 0  | 2   | 0 | 0 | 0  | 0 | 2   |
| P131 | 0  | 0   | 0 | 0 | 0  | 0 | 0   |
| P132 | 4  | 3   | 0 | 0 | 1  | 0 | 8   |
| P133 | 1  | 2   | 1 | 0 | 0  | 0 | 4   |
| P134 | 43 | 112 | 3 | 7 | 11 | 1 | 177 |
| P135 | 0  | 6   | 0 | 0 | 1  | 0 | 7   |
| P136 | 0  | 0   | 0 | 0 | 0  | 0 | 0   |
| P137 | 1  | 2   | 0 | 0 | 1  | 0 | 4   |
| P138 | 1  | 2   | 1 | 0 | 0  | 0 | 4   |
| P139 | 0  | 0   | 0 | 0 | 0  | 0 | 0   |
| P140 | 19 | 31  | 3 | 0 | 1  | 1 | 55  |
| P141 | 1  | 5   | 0 | 0 | 1  | 0 | 7   |
| P142 | 1  | 2   | 1 | 0 | 0  | 0 | 4   |
| P143 | 0  | 3   | 1 | 2 | 1  | 0 | 7   |
| P144 | 1  | 5   | 1 | 0 | 2  | 0 | 9   |

|      |   |    |   |   |    |   |    |
|------|---|----|---|---|----|---|----|
| P145 | 0 | 0  | 1 | 0 | 1  | 0 | 2  |
| P146 | 0 | 1  | 0 | 0 | 0  | 0 | 1  |
| P147 | 3 | 4  | 1 | 0 | 0  | 0 | 8  |
| P148 | 0 | 3  | 1 | 0 | 0  | 0 | 4  |
| P149 | 0 | 3  | 0 | 0 | 0  | 1 | 4  |
| P150 | 0 | 0  | 0 | 0 | 0  | 0 | 0  |
| P151 | 7 | 27 | 1 | 3 | 12 | 1 | 51 |
| P152 | 0 | 0  | 0 | 0 | 0  | 0 | 0  |
| P153 | 1 | 5  | 0 | 0 | 0  | 0 | 6  |
| P154 | 0 | 4  | 2 | 0 | 0  | 0 | 6  |
| P155 | 1 | 2  | 1 | 0 | 0  | 0 | 4  |
| P156 | 2 | 6  | 0 | 0 | 0  | 0 | 8  |
| P157 | 0 | 0  | 0 | 0 | 0  | 1 | 1  |
| P158 | 9 | 28 | 1 | 1 | 5  | 2 | 46 |
| P159 | 0 | 3  | 1 | 1 | 0  | 0 | 5  |
| P160 | 0 | 0  | 0 | 0 | 0  | 0 | 0  |
