# Supplementary material for: Novel recurrently mutated genes and a prognostic mutation signature in colorectal cancer
Source: HighWire-hosted journal article supplement (doi:10.1136/gutjnl-2013-306620), 2014-06-20
Supplement: gutjnl-2013-306620supp_tableS7.pdf [file gutjnl-2013-306620supp_tableS7.pdf]

**Table S7.** Frequencies of mutated genes in 160 colorectal cancer patients identified by targeted capture sequencing.

| Gene     | missense | nonsense | splicing | frameshift_indel | nonframeshift_indel | mutated_sample_num | total_sample_num | mutation_frequency |
|----------|----------|----------|----------|------------------|---------------------|--------------------|------------------|--------------------|
| APC      | 8        | 68       | 4        | 42               | 1                   | 90                 | 160              | 0.5625             |
| TP53     | 49       | 11       | 5        | 4                | 2                   | 67                 | 160              | 0.41875            |
| KRAS     | 51       | 1        | 0        | 0                | 0                   | 52                 | 160              | 0.325              |
| SYNE1    | 51       | 7        | 2        | 3                | 0                   | 28                 | 160              | 0.175              |
| FAT4     | 34       | 1        | 0        | 0                | 0                   | 23                 | 160              | 0.14375            |
| ATM      | 18       | 2        | 2        | 5                | 0                   | 17                 | 160              | 0.10625            |
| USH2A    | 27       | 4        | 1        | 0                | 0                   | 16                 | 160              | 0.1                |
| CDH10    | 15       | 0        | 0        | 4                | 0                   | 14                 | 160              | 0.0875             |
| MLL3     | 16       | 1        | 1        | 4                | 0                   | 14                 | 160              | 0.0875             |
| HMCN1    | 23       | 3        | 0        | 1                | 0                   | 13                 | 160              | 0.08125            |
| LRP2     | 18       | 0        | 0        | 3                | 0                   | 13                 | 160              | 0.08125            |
| RYR1     | 19       | 1        | 0        | 0                | 1                   | 13                 | 160              | 0.08125            |
| VCAN     | 19       | 2        | 1        | 1                | 0                   | 13                 | 160              | 0.08125            |
| DMD      | 9        | 4        | 0        | 1                | 0                   | 12                 | 160              | 0.075              |
| DOCK2    | 15       | 0        | 0        | 0                | 0                   | 12                 | 160              | 0.075              |
| PCDH15   | 15       | 1        | 0        | 1                | 1                   | 12                 | 160              | 0.075              |
| F8       | 12       | 1        | 0        | 3                | 0                   | 10                 | 160              | 0.0625             |
| SMAD4    | 9        | 0        | 0        | 1                | 0                   | 10                 | 160              | 0.0625             |
| AKAP9    | 11       | 1        | 0        | 3                | 2                   | 9                  | 160              | 0.05625            |
| COL1A2   | 10       | 2        | 0        | 0                | 0                   | 9                  | 160              | 0.05625            |
| COL6A3   | 11       | 1        | 0        | 0                | 0                   | 9                  | 160              | 0.05625            |
| HERC2    | 15       | 0        | 1        | 1                | 0                   | 9                  | 160              | 0.05625            |
| LAMA2    | 11       | 0        | 0        | 1                | 0                   | 9                  | 160              | 0.05625            |
| NBAS     | 9        | 0        | 1        | 1                | 0                   | 9                  | 160              | 0.05625            |
| COL5A1   | 12       | 0        | 0        | 0                | 0                   | 8                  | 160              | 0.05               |
| EP400    | 10       | 1        | 0        | 0                | 1                   | 8                  | 160              | 0.05               |
| FAT2     | 10       | 1        | 0        | 1                | 0                   | 8                  | 160              | 0.05               |
| PDE10A   | 7        | 0        | 2        | 0                | 0                   | 8                  | 160              | 0.05               |
| RELN     | 10       | 1        | 0        | 0                | 0                   | 8                  | 160              | 0.05               |
| TMEM132D | 12       | 1        | 0        | 0                | 0                   | 8                  | 160              | 0.05               |
| CDH9     | 10       | 1        | 1        | 0                | 0                   | 7                  | 160              | 0.04375            |
| COL3A1   | 5        | 1        | 1        | 1                | 0                   | 7                  | 160              | 0.04375            |
| FLG      | 9        | 0        | 0        | 1                | 0                   | 7                  | 160              | 0.04375            |
| GRM1     | 11       | 0        | 0        | 1                | 0                   | 7                  | 160              | 0.04375            |
| LAMA1    | 8        | 0        | 2        | 1                | 0                   | 7                  | 160              | 0.04375            |
| MUC17    | 12       | 0        | 0        | 0                | 0                   | 7                  | 160              | 0.04375            |
| PCDH9    | 7        | 0        | 0        | 1                | 0                   | 7                  | 160              | 0.04375            |

|         |    |   |   |   |   |   |     |         |
|---------|----|---|---|---|---|---|-----|---------|
| SPTA1   | 9  | 0 | 1 | 2 | 0 | 7 | 160 | 0.04375 |
| THBS2   | 12 | 0 | 0 | 0 | 0 | 7 | 160 | 0.04375 |
| TNC     | 7  | 0 | 1 | 0 | 0 | 7 | 160 | 0.04375 |
| VWF     | 7  | 0 | 0 | 1 | 0 | 7 | 160 | 0.04375 |
| CTNNB1  | 6  | 0 | 0 | 0 | 0 | 6 | 160 | 0.0375  |
| DCHS2   | 11 | 2 | 1 | 0 | 0 | 6 | 160 | 0.0375  |
| FLNB    | 6  | 0 | 0 | 0 | 0 | 6 | 160 | 0.0375  |
| IGSF10  | 11 | 3 | 1 | 0 | 0 | 6 | 160 | 0.0375  |
| ITGAE   | 9  | 0 | 0 | 1 | 0 | 6 | 160 | 0.0375  |
| LRRC7   | 9  | 2 | 0 | 0 | 0 | 6 | 160 | 0.0375  |
| NF1     | 6  | 0 | 0 | 1 | 0 | 6 | 160 | 0.0375  |
| PCDHA11 | 7  | 0 | 0 | 0 | 0 | 6 | 160 | 0.0375  |
| RNF213  | 9  | 0 | 0 | 2 | 0 | 6 | 160 | 0.0375  |
| SLC12A5 | 6  | 0 | 0 | 0 | 0 | 6 | 160 | 0.0375  |
| ATP1A2  | 3  | 0 | 2 | 0 | 0 | 5 | 160 | 0.03125 |
| CDH26   | 1  | 0 | 0 | 0 | 4 | 5 | 160 | 0.03125 |
| CDH8    | 4  | 0 | 1 | 0 | 0 | 5 | 160 | 0.03125 |
| CLSTN2  | 5  | 0 | 0 | 0 | 0 | 5 | 160 | 0.03125 |
| DCC     | 4  | 0 | 1 | 1 | 0 | 5 | 160 | 0.03125 |
| GUCY1A2 | 6  | 1 | 0 | 0 | 0 | 5 | 160 | 0.03125 |
| GUCY1A3 | 6  | 0 | 0 | 0 | 0 | 5 | 160 | 0.03125 |
| MTOR    | 5  | 0 | 0 | 0 | 0 | 5 | 160 | 0.03125 |
| MYH4    | 11 | 0 | 0 | 1 | 0 | 5 | 160 | 0.03125 |
| PCDHA2  | 6  | 0 | 0 | 0 | 0 | 5 | 160 | 0.03125 |
| PPP1R3A | 6  | 2 | 0 | 0 | 0 | 5 | 160 | 0.03125 |
| PTPRM   | 8  | 1 | 0 | 0 | 0 | 5 | 160 | 0.03125 |
| SOS2    | 8  | 1 | 0 | 0 | 0 | 5 | 160 | 0.03125 |
| TAF1    | 6  | 0 | 0 | 1 | 0 | 5 | 160 | 0.03125 |
| ARMC4   | 5  | 0 | 1 | 0 | 0 | 4 | 160 | 0.025   |
| ATP2B2  | 4  | 0 | 0 | 0 | 0 | 4 | 160 | 0.025   |
| ATR     | 8  | 0 | 1 | 1 | 0 | 4 | 160 | 0.025   |
| BRCA1   | 4  | 0 | 0 | 0 | 0 | 4 | 160 | 0.025   |
| CDH7    | 4  | 1 | 0 | 0 | 0 | 4 | 160 | 0.025   |
| DPP10   | 4  | 0 | 0 | 0 | 0 | 4 | 160 | 0.025   |
| EP300   | 4  | 1 | 1 | 1 | 0 | 4 | 160 | 0.025   |
| ERBB4   | 6  | 1 | 0 | 0 | 0 | 4 | 160 | 0.025   |
| GNAZ    | 3  | 0 | 0 | 1 | 0 | 4 | 160 | 0.025   |
| ITGB4   | 4  | 0 | 0 | 0 | 0 | 4 | 160 | 0.025   |
| MYH1    | 3  | 1 | 0 | 0 | 0 | 4 | 160 | 0.025   |
| MYST3   | 7  | 3 | 0 | 0 | 0 | 4 | 160 | 0.025   |
| PCDHA7  | 5  | 0 | 0 | 0 | 0 | 4 | 160 | 0.025   |
| PCDHAC1 | 9  | 0 | 0 | 0 | 0 | 4 | 160 | 0.025   |

|         |   |   |   |   |   |   |     |         |
|---------|---|---|---|---|---|---|-----|---------|
| PCDHB13 | 5 | 0 | 0 | 0 | 0 | 4 | 160 | 0.025   |
| SMAD3   | 4 | 0 | 0 | 0 | 0 | 4 | 160 | 0.025   |
| TAF1L   | 4 | 0 | 0 | 1 | 0 | 4 | 160 | 0.025   |
| TRRAP   | 5 | 1 | 0 | 0 | 0 | 4 | 160 | 0.025   |
| ACACB   | 9 | 0 | 1 | 1 | 0 | 3 | 160 | 0.01875 |
| ACSL6   | 2 | 0 | 0 | 1 | 0 | 3 | 160 | 0.01875 |
| ADCY2   | 6 | 0 | 0 | 0 | 0 | 3 | 160 | 0.01875 |
| ADCY6   | 4 | 0 | 0 | 0 | 0 | 3 | 160 | 0.01875 |
| ADCY9   | 5 | 0 | 0 | 0 | 0 | 3 | 160 | 0.01875 |
| ARHGAP5 | 2 | 1 | 0 | 2 | 0 | 3 | 160 | 0.01875 |
| ATP1A4  | 3 | 0 | 0 | 1 | 0 | 3 | 160 | 0.01875 |
| COL17A1 | 3 | 1 | 0 | 0 | 0 | 3 | 160 | 0.01875 |
| COL18A1 | 4 | 0 | 0 | 0 | 0 | 3 | 160 | 0.01875 |
| CTBP2   | 3 | 0 | 0 | 0 | 0 | 3 | 160 | 0.01875 |
| CTNNA1  | 4 | 0 | 0 | 0 | 0 | 3 | 160 | 0.01875 |
| DVL3    | 3 | 0 | 0 | 0 | 0 | 3 | 160 | 0.01875 |
| ELMO1   | 4 | 0 | 0 | 0 | 0 | 3 | 160 | 0.01875 |
| EPS15   | 3 | 1 | 0 | 0 | 0 | 3 | 160 | 0.01875 |
| FANCC   | 2 | 1 | 0 | 0 | 0 | 3 | 160 | 0.01875 |
| FYN     | 4 | 0 | 0 | 0 | 0 | 3 | 160 | 0.01875 |
| HGF     | 2 | 0 | 0 | 1 | 0 | 3 | 160 | 0.01875 |
| HTR2C   | 2 | 1 | 0 | 0 | 0 | 3 | 160 | 0.01875 |
| MAP2K1  | 3 | 0 | 0 | 0 | 0 | 3 | 160 | 0.01875 |
| MAP2K7  | 2 | 0 | 0 | 1 | 0 | 3 | 160 | 0.01875 |
| MAP3K15 | 4 | 0 | 0 | 0 | 0 | 3 | 160 | 0.01875 |
| MYLK    | 3 | 0 | 0 | 0 | 1 | 3 | 160 | 0.01875 |
| PARP4   | 4 | 0 | 0 | 0 | 0 | 3 | 160 | 0.01875 |
| PCDHA4  | 4 | 0 | 0 | 0 | 0 | 3 | 160 | 0.01875 |
| PCDHB1  | 2 | 2 | 0 | 1 | 0 | 3 | 160 | 0.01875 |
| PCDHB3  | 4 | 0 | 0 | 0 | 0 | 3 | 160 | 0.01875 |
| PCDHB7  | 5 | 0 | 0 | 0 | 0 | 3 | 160 | 0.01875 |
| PCMTD1  | 2 | 0 | 0 | 1 | 0 | 3 | 160 | 0.01875 |
| PGCP    | 3 | 0 | 0 | 0 | 0 | 3 | 160 | 0.01875 |
| PSG9    | 1 | 0 | 1 | 1 | 0 | 3 | 160 | 0.01875 |
| RPS6KA5 | 3 | 0 | 0 | 0 | 0 | 3 | 160 | 0.01875 |
| SCNN1G  | 3 | 0 | 0 | 0 | 0 | 3 | 160 | 0.01875 |
| ST8SIA1 | 3 | 0 | 0 | 0 | 0 | 3 | 160 | 0.01875 |
| ACTC1   | 2 | 0 | 0 | 0 | 0 | 2 | 160 | 0.0125  |
| AKR1C4  | 3 | 0 | 0 | 0 | 0 | 2 | 160 | 0.0125  |
| ANKFN1  | 2 | 0 | 1 | 0 | 0 | 2 | 160 | 0.0125  |
| ARAF    | 2 | 0 | 0 | 0 | 0 | 2 | 160 | 0.0125  |
| ATP2B3  | 2 | 0 | 0 | 0 | 0 | 2 | 160 | 0.0125  |

|          |   |   |   |   |   |   |     |        |
|----------|---|---|---|---|---|---|-----|--------|
| BACH2    | 4 | 0 | 0 | 0 | 0 | 2 | 160 | 0.0125 |
| CASP8    | 1 | 0 | 0 | 2 | 0 | 2 | 160 | 0.0125 |
| CBL      | 2 | 0 | 0 | 0 | 0 | 2 | 160 | 0.0125 |
| CD44     | 2 | 0 | 1 | 0 | 0 | 2 | 160 | 0.0125 |
| CDC27    | 1 | 0 | 0 | 0 | 1 | 2 | 160 | 0.0125 |
| CPXM1    | 2 | 0 | 0 | 0 | 0 | 2 | 160 | 0.0125 |
| CREBBP   | 2 | 0 | 0 | 0 | 0 | 2 | 160 | 0.0125 |
| DCT      | 4 | 1 | 0 | 0 | 0 | 2 | 160 | 0.0125 |
| FGF13    | 2 | 0 | 0 | 0 | 0 | 2 | 160 | 0.0125 |
| GLB1L2   | 3 | 0 | 0 | 0 | 0 | 2 | 160 | 0.0125 |
| INS-IGF2 | 1 | 0 | 0 | 1 | 0 | 2 | 160 | 0.0125 |
| KIR2DS4  | 2 | 0 | 0 | 0 | 0 | 2 | 160 | 0.0125 |
| MTMR8    | 2 | 0 | 0 | 0 | 0 | 2 | 160 | 0.0125 |
| MYH2     | 5 | 0 | 0 | 0 | 0 | 2 | 160 | 0.0125 |
| NCOA4    | 2 | 0 | 0 | 0 | 0 | 2 | 160 | 0.0125 |
| NCOA6    | 2 | 0 | 0 | 0 | 0 | 2 | 160 | 0.0125 |
| NLRP13   | 4 | 1 | 0 | 0 | 0 | 2 | 160 | 0.0125 |
| NOX5     | 2 | 1 | 0 | 0 | 0 | 2 | 160 | 0.0125 |
| NTN4     | 2 | 0 | 0 | 0 | 0 | 2 | 160 | 0.0125 |
| OR2M5    | 3 | 0 | 0 | 0 | 0 | 2 | 160 | 0.0125 |
| PAK1     | 2 | 0 | 0 | 0 | 0 | 2 | 160 | 0.0125 |
| PAXIP1   | 1 | 0 | 0 | 0 | 1 | 2 | 160 | 0.0125 |
| PCDHA12  | 2 | 0 | 0 | 0 | 0 | 2 | 160 | 0.0125 |
| PCDHA6   | 2 | 0 | 0 | 0 | 0 | 2 | 160 | 0.0125 |
| PCDHA8   | 2 | 0 | 0 | 0 | 0 | 2 | 160 | 0.0125 |
| PCDHA9   | 2 | 0 | 0 | 0 | 0 | 2 | 160 | 0.0125 |
| PCDHB14  | 2 | 0 | 0 | 0 | 0 | 2 | 160 | 0.0125 |
| PCDHB15  | 2 | 0 | 0 | 0 | 0 | 2 | 160 | 0.0125 |
| PCDHB2   | 2 | 0 | 0 | 0 | 0 | 2 | 160 | 0.0125 |
| PCDHB5   | 2 | 0 | 0 | 0 | 0 | 2 | 160 | 0.0125 |
| PCDHB6   | 1 | 1 | 0 | 0 | 0 | 2 | 160 | 0.0125 |
| PDGFRA   | 3 | 0 | 0 | 0 | 0 | 2 | 160 | 0.0125 |
| PHKA2    | 2 | 0 | 0 | 0 | 0 | 2 | 160 | 0.0125 |
| PIK3R3   | 2 | 0 | 0 | 0 | 0 | 2 | 160 | 0.0125 |
| PLAU     | 2 | 0 | 0 | 0 | 0 | 2 | 160 | 0.0125 |
| PRPF8    | 3 | 0 | 0 | 0 | 0 | 2 | 160 | 0.0125 |
| PSG1     | 2 | 0 | 0 | 0 | 0 | 2 | 160 | 0.0125 |
| PSG3     | 2 | 0 | 0 | 0 | 0 | 2 | 160 | 0.0125 |
| RPS6KB2  | 2 | 0 | 0 | 0 | 0 | 2 | 160 | 0.0125 |
| RSPO2    | 2 | 0 | 0 | 0 | 0 | 2 | 160 | 0.0125 |
| SH3KBP1  | 0 | 0 | 1 | 1 | 0 | 2 | 160 | 0.0125 |
| SHC3     | 2 | 0 | 0 | 0 | 0 | 2 | 160 | 0.0125 |

|          |   |   |   |   |   |   |     |         |
|----------|---|---|---|---|---|---|-----|---------|
| SORBS1   | 1 | 0 | 0 | 1 | 0 | 2 | 160 | 0.0125  |
| SOS1     | 2 | 0 | 0 | 0 | 0 | 2 | 160 | 0.0125  |
| TRAF1    | 2 | 0 | 0 | 0 | 0 | 2 | 160 | 0.0125  |
| WDR59    | 0 | 1 | 0 | 1 | 0 | 2 | 160 | 0.0125  |
| AKR1C3   | 1 | 0 | 0 | 0 | 0 | 1 | 160 | 0.00625 |
| ANAPC4   | 1 | 0 | 0 | 0 | 0 | 1 | 160 | 0.00625 |
| ATP1A3   | 1 | 0 | 0 | 0 | 0 | 1 | 160 | 0.00625 |
| BTK      | 2 | 0 | 0 | 0 | 0 | 1 | 160 | 0.00625 |
| C10orf81 | 0 | 0 | 1 | 0 | 0 | 1 | 160 | 0.00625 |
| CDH11    | 1 | 0 | 0 | 0 | 0 | 1 | 160 | 0.00625 |
| CSTL1    | 1 | 0 | 0 | 0 | 0 | 1 | 160 | 0.00625 |
| EPS15L1  | 2 | 0 | 0 | 0 | 0 | 1 | 160 | 0.00625 |
| FGR      | 1 | 0 | 0 | 0 | 0 | 1 | 160 | 0.00625 |
| FZD1     | 1 | 0 | 0 | 0 | 0 | 1 | 160 | 0.00625 |
| FZD7     | 1 | 0 | 0 | 0 | 0 | 1 | 160 | 0.00625 |
| FZD8     | 2 | 0 | 0 | 0 | 0 | 1 | 160 | 0.00625 |
| G6PC     | 2 | 0 | 0 | 0 | 0 | 1 | 160 | 0.00625 |
| GDPD3    | 2 | 0 | 0 | 0 | 0 | 1 | 160 | 0.00625 |
| GFI1B    | 1 | 0 | 0 | 0 | 0 | 1 | 160 | 0.00625 |
| HSD11B1  | 1 | 0 | 0 | 0 | 0 | 1 | 160 | 0.00625 |
| IFNA10   | 1 | 0 | 0 | 0 | 0 | 1 | 160 | 0.00625 |
| IFNA5    | 0 | 1 | 0 | 0 | 0 | 1 | 160 | 0.00625 |
| KIR2DL1  | 0 | 0 | 1 | 0 | 0 | 1 | 160 | 0.00625 |
| KIR3DL1  | 1 | 0 | 0 | 0 | 0 | 1 | 160 | 0.00625 |
| KIR3DL3  | 0 | 0 | 1 | 0 | 0 | 1 | 160 | 0.00625 |
| KPNB1    | 1 | 0 | 0 | 0 | 0 | 1 | 160 | 0.00625 |
| KRT3     | 0 | 0 | 0 | 0 | 1 | 1 | 160 | 0.00625 |
| LIPT1    | 0 | 0 | 0 | 1 | 0 | 1 | 160 | 0.00625 |
| LRRC27   | 1 | 0 | 0 | 0 | 0 | 1 | 160 | 0.00625 |
| MAP2K2   | 1 | 0 | 0 | 0 | 0 | 1 | 160 | 0.00625 |
| MAPK4    | 1 | 0 | 0 | 0 | 0 | 1 | 160 | 0.00625 |
| MED15    | 0 | 0 | 0 | 0 | 1 | 1 | 160 | 0.00625 |
| MMP2     | 1 | 0 | 0 | 0 | 0 | 1 | 160 | 0.00625 |
| MYH13    | 1 | 0 | 0 | 0 | 0 | 1 | 160 | 0.00625 |
| MYH3     | 1 | 0 | 0 | 0 | 0 | 1 | 160 | 0.00625 |
| MYH8     | 1 | 0 | 0 | 0 | 0 | 1 | 160 | 0.00625 |
| OR2M2    | 1 | 0 | 0 | 0 | 0 | 1 | 160 | 0.00625 |
| OR2M3    | 1 | 0 | 0 | 0 | 0 | 1 | 160 | 0.00625 |
| OR2M7    | 1 | 0 | 0 | 0 | 0 | 1 | 160 | 0.00625 |
| OR8B12   | 1 | 0 | 0 | 0 | 0 | 1 | 160 | 0.00625 |
| PCDHA10  | 1 | 0 | 0 | 0 | 0 | 1 | 160 | 0.00625 |
| PCDHA1   | 1 | 0 | 0 | 0 | 0 | 1 | 160 | 0.00625 |

|          |   |   |   |   |   |   |     |         |
|----------|---|---|---|---|---|---|-----|---------|
| PCDHA3   | 1 | 0 | 0 | 0 | 0 | 1 | 160 | 0.00625 |
| PCDHB10  | 1 | 0 | 0 | 0 | 0 | 1 | 160 | 0.00625 |
| PCDHB12  | 1 | 0 | 0 | 0 | 0 | 1 | 160 | 0.00625 |
| PCDHB16  | 1 | 0 | 0 | 0 | 0 | 1 | 160 | 0.00625 |
| PCDHB4   | 0 | 0 | 0 | 1 | 0 | 1 | 160 | 0.00625 |
| PCDHB8   | 1 | 0 | 0 | 0 | 0 | 1 | 160 | 0.00625 |
| PFKM     | 1 | 0 | 0 | 0 | 0 | 1 | 160 | 0.00625 |
| PKD1L1   | 1 | 0 | 0 | 0 | 0 | 1 | 160 | 0.00625 |
| PLK3     | 1 | 0 | 0 | 0 | 0 | 1 | 160 | 0.00625 |
| PPP3CB   | 1 | 0 | 0 | 0 | 0 | 1 | 160 | 0.00625 |
| PRKAA1   | 1 | 0 | 0 | 0 | 0 | 1 | 160 | 0.00625 |
| PRKG1    | 0 | 1 | 0 | 0 | 0 | 1 | 160 | 0.00625 |
| PRKG2    | 4 | 0 | 0 | 0 | 0 | 1 | 160 | 0.00625 |
| PSG11    | 1 | 0 | 0 | 0 | 0 | 1 | 160 | 0.00625 |
| PSG2     | 1 | 0 | 0 | 0 | 0 | 1 | 160 | 0.00625 |
| PSG6     | 1 | 0 | 0 | 0 | 0 | 1 | 160 | 0.00625 |
| PSG8     | 0 | 0 | 1 | 0 | 0 | 1 | 160 | 0.00625 |
| PTPRU    | 1 | 0 | 0 | 0 | 0 | 1 | 160 | 0.00625 |
| RAD1     | 1 | 0 | 0 | 0 | 0 | 1 | 160 | 0.00625 |
| RYR3     | 1 | 0 | 0 | 0 | 0 | 1 | 160 | 0.00625 |
| SLC12A4  | 1 | 0 | 0 | 0 | 0 | 1 | 160 | 0.00625 |
| SLC12A7  | 1 | 0 | 0 | 0 | 0 | 1 | 160 | 0.00625 |
| SPESP1   | 1 | 0 | 0 | 0 | 0 | 1 | 160 | 0.00625 |
| TALDO1   | 1 | 0 | 0 | 0 | 0 | 1 | 160 | 0.00625 |
| TGFB2    | 1 | 0 | 0 | 0 | 0 | 1 | 160 | 0.00625 |
| TMEM132C | 1 | 0 | 0 | 0 | 0 | 1 | 160 | 0.00625 |
| TSNARE1  | 0 | 0 | 0 | 0 | 1 | 1 | 160 | 0.00625 |
| USPL1    | 1 | 0 | 0 | 0 | 0 | 1 | 160 | 0.00625 |

---
