# Supplementary material for: Novel recurrently mutated genes and a prognostic mutation signature in colorectal cancer
Source: HighWire-hosted journal article supplement (doi:10.1136/gutjnl-2013-306620), 2014-06-20
Supplement: gutjnl-2013-306620supp_tableS8.pdf [file gutjnl-2013-306620supp_tableS8.pdf]

**Table S8.** A complete list of somatic point mutations identified in 160 colorectal cancer patients by targeted capture sequencing.

| Chrom | Start    | End      | Ref | Obs | Func            | ExonicFunc        | Gene    | Amino acid change              | dbSNP_id    | SIFT | mutated | sample |
|-------|----------|----------|-----|-----|-----------------|-------------------|---------|--------------------------------|-------------|------|---------|--------|
| chr1  | 1.51E+08 | 1.51E+08 | G   | A   | exonic          | synonymous SNV    | FLG     | NM_002016:c.C4278T;p.S1426S    |             |      |         | P47    |
| chr1  | 1.57E+08 | 1.57E+08 | C   | T   | exonic          | synonymous SNV    | SPTA1   | NM_003126:c.G2943A;p.R981R     |             |      |         | P47    |
| chr2  | 1.16E+08 | 1.16E+08 | G   | T   | exonic          | synonymous SNV    | DPP10   | NM_001004360:c.G1998T;p.V666V  |             |      |         | P47    |
| chr5  | 1.12E+08 | 1.12E+08 | C   | T   | exonic          | stopgain SNV      | APC     | NM_001127511:c.C3958T;p.Q1320X |             |      | 0.07    | P47    |
| chr6  | 1.66E+08 | 1.66E+08 | G   | A   | exonic          | nonsynonymous SNV | PDE10A  | NM_001130690:c.C1399T;p.R467C  |             |      | 0.06    | P47    |
| chr7  | 93877014 | 93877014 | G   | A   | exonic          | nonsynonymous SNV | COL1A2  | NM_000089:c.G980A;p.R327H      |             |      | 0.01    | P47    |
| chr10 | 28273768 | 28273768 | C   | T   | exonic          | nonsynonymous SNV | ARMC4   | NM_018076:c.G1516A;p.D506N     |             |      | 0.37    | P47    |
| chr17 | 7517831  | 7517831  | G   | A   | exonic          | nonsynonymous SNV | TP53    | NM_001126115:c.C436T;p.P146S   |             |      | 0       | P47    |
| chr21 | 45754591 | 45754591 | C   | A   | exonic          | synonymous SNV    | COL18A1 | NM_030582:c.C4212A;p.I1404I    |             |      |         | P47    |
| chr2  | 1.9E+08  | 1.9E+08  | C   | T   | exonic          | stopgain SNV      | COL3A1  | NM_000090:c.C922T;p.R308X      |             |      | 0       | P48    |
| chr2  | 2.38E+08 | 2.38E+08 | C   | T   | exonic          | synonymous SNV    | COL6A3  | NM_057164:c.G546A;p.Q182Q      |             |      |         | P48    |
| chr3  | 10392307 | 10392307 | G   | A   | exonic          | nonsynonymous SNV | ATP2B2  | NM_001683:c.C1088T;p.T363M     |             |      | 0       | P48    |
| chr3  | 1.25E+08 | 1.25E+08 | C   | T   | exonic          | nonsynonymous SNV | MYLK    | NM_053031:c.G403A;p.E135K      |             |      | 0.83    | P48    |
| chr4  | 1.57E+08 | 1.57E+08 | G   | T   | exonic          | nonsynonymous SNV | GUCY1A3 | NM_001130684:c.G1166T;p.R389I  |             |      | 0.05    | P48    |
| chr5  | 1.12E+08 | 1.12E+08 | G   | T   | exonic;splicing | nonsynonymous SNV | APC     | NM_001127511:c.G1904T;p.R635M  |             |      | 0.01    | P48    |
| chr5  | 1.41E+08 | 1.41E+08 | C   | T   | exonic          | synonymous SNV    | PCDHB11 | NM_018931:c.C1383T;p.R461R     |             |      |         | P48    |
| chr9  | 1.37E+08 | 1.37E+08 | C   | T   | exonic          | nonsynonymous SNV | COL5A1  | NM_000093:c.C3086T;p.P1029L    |             |      | 0       | P48    |
| chr12 | 25289552 | 25289552 | C   | T   | exonic          | nonsynonymous SNV | KRAS    | NM_004985:c.G34A;p.G12S        |             |      | 0       | P48    |
| chr19 | 47925229 | 47925229 | G   | T   | exonic          | nonsynonymous SNV | PSG3    | NM_021016:c.C1129A;p.Q377K     |             |      | 0.05    | P48    |
| chr10 | 28268831 | 28268831 | C   | A   | splicing        |                   | ARMC4   |                                |             |      |         | P49    |
| chr1  | 69998527 | 69998527 | C   | T   | exonic          | stopgain SNV      | LRRC7   | NM_020794:c.C52T;p.R18X        |             |      | 0       | P50    |
| chr2  | 2.38E+08 | 2.38E+08 | C   | T   | exonic          | nonsynonymous SNV | COL6A3  | NM_057166:c.G5164A;p.G1722R    |             |      |         | P50    |
| chr4  | 1.27E+08 | 1.27E+08 | G   | A   | exonic          | nonsynonymous SNV | FAT4    | NM_024582:c.G11515A;p.A3839T   |             |      | 0.12    | P50    |
| chr5  | 26917291 | 26917291 | G   | A   | exonic          | nonsynonymous SNV | CDH9    | NM_016279:c.C2081T;p.P694L     |             |      | 0       | P50    |
| chr5  | 1.12E+08 | 1.12E+08 | G   | T   | exonic          | stopgain SNV      | APC     | NM_001127511:c.G3451T;p.E1151X |             |      | 0.17    | P50    |
| chr5  | 1.4E+08  | 1.4E+08  | G   | C   | exonic          | nonsynonymous SNV | PCDHA11 | NM_018902:c.G1552C;p.A518P     |             |      |         | P50    |
| chr12 | 22246054 | 22246054 | C   | T   | exonic          | nonsynonymous SNV | ST8SIA1 | NM_003034:c.G770A;p.R257H      |             |      | 0.16    | P50    |
| chr12 | 25289548 | 25289548 | C   | T   | exonic          | nonsynonymous SNV | KRAS    | NM_004985:c.G38A;p.G13D        | rs112445441 |      | 0       | P50    |
| chr5  | 1.12E+08 | 1.12E+08 | C   | A   | exonic          | stopgain SNV      | APC     | NM_001127511:c.C4013A;p.S1338X |             |      | 0.72    | P138   |
| chr5  | 1.51E+08 | 1.51E+08 | G   | A   | exonic          | nonsynonymous SNV | FAT2    | NM_001447:c.C12446T;p.P4149L   |             |      | 0       | P138   |
| chr6  | 1.3E+08  | 1.3E+08  | G   | A   | exonic          | nonsynonymous SNV | LAMA2   | NM_000426:c.G5433A;p.M1811I    |             |      | 0.61    | P138   |
| chr17 | 38498137 | 38498137 | A   | G   | exonic          | synonymous SNV    | BRCA1   | NM_007297:c.T2796C;p.R932R     |             |      |         | P138   |
| chr5  | 7573913  | 7573913  | C   | T   | exonic          | synonymous SNV    | ADCY2   | NM_020546:c.C471T;p.D157D      |             |      |         | P137   |
| chr5  | 1.41E+08 | 1.41E+08 | C   | T   | exonic          | synonymous SNV    | PCDHB7  | NM_018940:c.C651T;p.G217G      | rs77257610  |      |         | P137   |
| chr12 | 25289551 | 25289551 | C   | T   | exonic          | nonsynonymous SNV | KRAS    | NM_004985:c.G35A;p.G12D        |             |      | 0       | P137   |
| chr19 | 60033245 | 60033245 | G   | A   | exonic          | nonsynonymous SNV | KIR3DL1 | NM_013289:c.G1156A;p.E386K     |             |      | 0       | P137   |
| chr2  | 2.38E+08 | 2.38E+08 | C   | T   | exonic          | synonymous SNV    | COL6A3  | NM_057166:c.G2073A;p.A691A     |             |      |         | P122   |
| chr4  | 1.55E+08 | 1.55E+08 | A   | C   | exonic          | nonsynonymous SNV | DCHS2   | NM_001142552:c.T3332G;p.L1111R |             |      | 0.02    | P122   |
| chr5  | 1.12E+08 | 1.12E+08 | C   | T   | exonic          | stopgain SNV      | APC     | NM_001127511:c.C2572T;p.R858X  |             |      | 0.03    | P122   |
| chr7  | 93894476 | 93894476 | G   | A   | exonic          | nonsynonymous SNV | COL1A2  | NM_000089:c.G3200A;p.R1067H    |             |      | 0.54    | P122   |
| chr9  | 21196913 | 21196913 | G   | A   | exonic          | nonsynonymous SNV | IFNA10  | NM_002171:c.C184T;p.P62S       |             |      | 0.01    | P122   |
| chr12 | 25289552 | 25289552 | C   | A   | exonic          | nonsynonymous SNV | KRAS    | NM_004985:c.G34T;p.G12C        |             |      | 0.01    | P122   |
| chr17 | 7519204  | 7519204  | G   | A   | exonic          | nonsynonymous SNV | TP53    | NM_001126115:c.C55T;p.P19S     | rs28934874  |      | 0.01    | P122   |
| chr1  | 2.47E+08 | 2.47E+08 | G   | T   | exonic          | synonymous SNV    | OR2M7   | NM_001004691:c.C132A;p.I44I    |             |      |         | P114   |
| chr5  | 1.12E+08 | 1.12E+08 | G   | T   | exonic          | stopgain SNV      | APC     | NM_001127511:c.G3979T;p.E1327X |             |      | 0.35    | P114   |
| chr6  | 1.66E+08 | 1.66E+08 | G   | A   | exonic          | synonymous SNV    | PDE10A  | NM_001130690:c.C1395T;p.P465P  |             |      |         | P114   |
| chr12 | 25289551 | 25289551 | C   | A   | exonic          | nonsynonymous SNV | KRAS    | NM_004985:c.G35T;p.G12V        |             |      | 0       | P114   |
| chr12 | 1.31E+08 | 1.31E+08 | C   | T   | exonic          | nonsynonymous SNV | EP400   | NM_015409:c.C3062T;p.A1021V    |             |      | 0.02    | P114   |

|           |          |          |   |   |          |                           |                                |             |      |      |
|-----------|----------|----------|---|---|----------|---------------------------|--------------------------------|-------------|------|------|
| chr17     | 7519131  | 7519131  | C | T | exonic   | nonsynonymous SN\ TP53    | NM_001126115:c.G128A:p.R43H    | rs28934578  | 0    | P114 |
| chr5      | 1.12E+08 | 1.12E+08 | C | T | exonic   | stopgain SNV APC          | NM_001127511:c.C667T:p.R223X   |             | 0    | P142 |
| chr5      | 1.51E+08 | 1.51E+08 | C | T | exonic   | nonsynonymous SN\ FAT2    | NM_001447:c.G10375A:p.G3459S   |             | 0.22 | P142 |
| chrX      | 32339935 | 32339935 | T | G | exonic   | nonsynonymous SN\ DMD     | NM_004011:c.A65C:p.K22T        |             | 0.51 | P142 |
| chr19_rai | 255163   | 255163   | C | T | exonic   | synonymous SNV KIR2DS3    | NM_012313:c.C909T:p.Y303Y      |             |      | P142 |
| chr4      | 1.27E+08 | 1.27E+08 | G | T | exonic   | nonsynonymous SN\ FAT4    | NM_024582:c.G7569T:p.M2523I    |             | 0.2  | P113 |
| chr5      | 1.4E+08  | 1.4E+08  | C | T | exonic   | synonymous SNV PCDHA6     | NM_018909:c.C1338T:p.A446A     |             |      | P113 |
| chr5      | 1.4E+08  | 1.4E+08  | C | G | exonic   | nonsynonymous SN\ PCDHA7  | NM_018910:c.C1355G:p.A452G     |             | 0.01 | P113 |
| chr5      | 1.4E+08  | 1.4E+08  | C | T | exonic   | nonsynonymous SN\ PCDHB2  | NM_018936:c.C1237T:p.R413W     |             | 0    | P113 |
| chr12     | 25289551 | 25289551 | C | A | exonic   | nonsynonymous SN\ KRAS    | NM_004985:c.G35T:p.G12V        |             | 0    | P113 |
| chr17     | 7517652  | 7517652  | C | T | splicing | TP53                      |                                |             |      | P113 |
| chr17     | 38500079 | 38500079 | C | T | exonic   | nonsynonymous SN\ BRCA1   | NM_007297:c.G854A:p.R285Q      | rs80357464  | 1    | P113 |
| chrX      | 1.54E+08 | 1.54E+08 | A | T | exonic   | nonsynonymous SN\ F8      | NM_000132:c.T354A:p.H118Q      |             | 0.04 | P113 |
| chr12     | 25289546 | 25289546 | C | T | exonic   | nonsynonymous SN\ KRAS    | NM_004985:c.G40A:p.V14I        | rs104894365 | 0    | P124 |
| chr17     | 7517807  | 7517807  | C | T | exonic   | nonsynonymous SN\ TP53    | NM_001126115:c.G460A:p.E154K   |             | 0    | P124 |
| chr1      | 2.47E+08 | 2.47E+08 | G | C | exonic   | nonsynonymous SN\ OR2M7   | NM_001004691:c.C862G:p.L288V   |             | 0.11 | P45  |
| chr5      | 1.4E+08  | 1.4E+08  | C | T | exonic   | nonsynonymous SN\ PCDHB3  | NM_018937:c.C182T:p.A61V       |             | 0.07 | P45  |
| chr5      | 1.41E+08 | 1.41E+08 | G | A | exonic   | nonsynonymous SN\ PCDHB12 | NM_018932:c.G1015A:p.D339N     |             | 0    | P45  |
| chr5      | 1.69E+08 | 1.69E+08 | G | A | exonic   | nonsynonymous SN\ DOCK2   | NM_004946:c.G5063A:p.S1688N    |             | 0.62 | P45  |
| chr6      | 1.53E+08 | 1.53E+08 | C | A | exonic   | stopgain SNV SYNE1        | NM_033071:c.G2347T:p.E783X     |             | 0    | P45  |
| chr7      | 1.51E+08 | 1.51E+08 | G | A | exonic   | stopgain SNV MLL3         | NM_170606:c.C13540T:p.Q4514X   |             | 0.07 | P45  |
| chr1      | 2.14E+08 | 2.14E+08 | A | G | splicing | USH2A                     |                                |             |      | P44  |
| chr5      | 1.12E+08 | 1.12E+08 | T | A | exonic   | stopgain SNV APC          | NM_001127511:c.T4452A:p.C1484X |             | 0.13 | P44  |
| chr5      | 1.4E+08  | 1.4E+08  | C | T | exonic   | synonymous SNV PCDHB4     | NM_018938:c.C2223T:p.T741T     |             |      | P44  |
| chr7      | 98414415 | 98414415 | C | T | exonic   | synonymous SNV TRRAP      | NM_003496:c.C8511T:p.C2837C    |             |      | P44  |
| chr17     | 7518264  | 7518264  | G | A | exonic   | nonsynonymous SN\ TP53    | NM_001126115:c.C346T:p.R116W   |             | 0    | P44  |
| chr3      | 1.53E+08 | 1.53E+08 | A | T | exonic   | synonymous SNV IGSF10     | NM_178822:c.T5145A:p.I1715I    |             |      | P41  |
| chr5      | 24523722 | 24523722 | G | C | exonic   | nonsynonymous SN\ CDH10   | NM_006727:c.C2174G:p.P725R     |             | 0.01 | P41  |
| chr5      | 1.12E+08 | 1.12E+08 | C | T | exonic   | stopgain SNV APC          | NM_001127511:c.C2572T:p.R858X  |             | 0.03 | P41  |
| chr5      | 1.41E+08 | 1.41E+08 | C | T | exonic   | synonymous SNV PCDHB12    | NM_018932:c.C1341T:p.N447N     |             |      | P41  |
| chr6      | 1.53E+08 | 1.53E+08 | C | T | exonic   | synonymous SNV SYNE1      | NM_015293:c.G6675A:p.P2225P    |             |      | P41  |
| chr8      | 98047412 | 98047412 | T | C | exonic   | nonsynonymous SN\ PGCP    | NM_016134:c.T923C:p.F308S      |             | 0.02 | P41  |
| chr12     | 25289551 | 25289551 | C | T | exonic   | nonsynonymous SN\ KRAS    | NM_004985:c.G35A:p.G12D        |             | 0    | P41  |
| chr17     | 7519264  | 7519264  | T | A | exonic   | nonsynonymous SN\ TP53    | NM_000546:c.A391T:p.N131Y      |             | 0    | P41  |
| chr22     | 21768357 | 21768357 | G | A | exonic   | nonsynonymous SN\ GNAZ    | NM_002073:c.G475A:p.D159N      |             | 0.2  | P41  |
| chrX      | 19388087 | 19388087 | A | G | exonic   | synonymous SNV MAP3K15    | NM_001001671:c.T825C:p.D275D   |             |      | P41  |
| chr1      | 1.51E+08 | 1.51E+08 | G | A | exonic   | synonymous SNV FLG        | NM_002016:c.C11721T:p.R3907R   |             |      | P40  |
| chr2      | 1.7E+08  | 1.7E+08  | T | G | exonic   | nonsynonymous SN\ LRP2    | NM_004525:c.A1400C:p.E467A     |             | 0.26 | P40  |
| chr4      | 1.27E+08 | 1.27E+08 | G | A | exonic   | nonsynonymous SN\ FAT4    | NM_024582:c.G11711A:p.C3904Y   |             | 0    | P40  |
| chr5      | 1.12E+08 | 1.12E+08 | G | T | exonic   | stopgain SNV APC          | NM_001127511:c.G3448T:p.E1150X |             | 0.01 | P40  |
| chr5      | 1.4E+08  | 1.4E+08  | G | A | exonic   | synonymous SNV PCDHA11    | NM_018902:c.G300A:p.A100A      |             |      | P40  |
| chr5      | 1.4E+08  | 1.4E+08  | G | A | exonic   | synonymous SNV PCDHA12    | NM_018903:c.G2202A:p.P734P     |             |      | P40  |
| chr5      | 1.69E+08 | 1.69E+08 | C | T | exonic   | nonsynonymous SN\ DOCK2   | NM_004946:c.C4759T:p.H1587Y    |             | 0    | P40  |
| chr15     | 32870657 | 32870657 | G | A | exonic   | nonsynonymous SN\ ACTC1   | NM_005159:c.C940T:p.R314C      |             |      | P40  |
| chr17     | 7517830  | 7517830  | G | A | exonic   | nonsynonymous SN\ TP53    | NM_001126115:c.C437T:p.P146L   |             | 0    | P40  |
| chr1      | 11096982 | 11096982 | A | C | exonic   | nonsynonymous SN\ MTOR    | NM_004958:c.T7280G:p.L2427R    |             | 0    | P43  |
| chr2      | 1.7E+08  | 1.7E+08  | C | T | exonic   | nonsynonymous SN\ LRP2    | NM_004525:c.G9592A:p.E3198K    |             | 0.51 | P43  |
| chr4      | 1.56E+08 | 1.56E+08 | A | G | splicing | DCHS2                     |                                |             |      | P43  |
| chr5      | 1.12E+08 | 1.12E+08 | C | G | exonic   | stopgain SNV APC          | NM_001127511:c.C3584G:p.S1195X |             | 0.49 | P43  |
| chr9      | 1.37E+08 | 1.37E+08 | G | A | exonic   | nonsynonymous SN\ COL5A1  | NM_000093:c.G2543A:p.R848H     |             | 0.03 | P43  |
| chr11     | 1.08E+08 | 1.08E+08 | A | G | exonic   | nonsynonymous SN\ ATM     | NM_000051:c.A7190G:p.Q2397R    |             | 0    | P43  |
| chr12     | 25271516 | 25271516 | T | G | exonic   | nonsynonymous SN\ KRAS    | NM_004985:c.A209C:p.Q70P       |             | 0    | P43  |
| chr17     | 7519275  | 7519275  | G | A | exonic   | nonsynonymous SN\ TP53    | NM_000546:c.C380T:p.S127F      |             | 0    | P43  |

|       |          |          |   |   |                 |                   |         |                                 |            |      |     |
|-------|----------|----------|---|---|-----------------|-------------------|---------|---------------------------------|------------|------|-----|
| chr1  | 2.14E+08 | 2.14E+08 | C | T | exonic          | nonsynonymous SN\ | USH2A   | NM_206933:c.G5806A:p.E1936K     | 0.85       | P42  |     |
| chr4  | 1.27E+08 | 1.27E+08 | C | T | exonic          | nonsynonymous SN\ | FAT4    | NM_024582:c.C13373T:p.T4458M    | 0          | P42  |     |
| chr5  | 1.12E+08 | 1.12E+08 | C | T | exonic          | stopgain SNV      | APC     | NM_001127511:c.C2572T:p.R858X   | 0.03       | P42  |     |
| chr5  | 1.4E+08  | 1.4E+08  | C | T | exonic          | nonsynonymous SN\ | PCDHA6  | NM_018909:c.C1982T:p.A661V      | 0          | P42  |     |
| chr10 | 5237731  | 5237731  | G | A | exonic          | synonymous SNV    | AKR1C4  | NM_001818:c.G381A:p.T127T       |            | P42  |     |
| chr12 | 5971347  | 5971347  | C | T | exonic          | nonsynonymous SN\ | VWF     | NM_000552:c.G6697A:p.E2233K     | 0.01       | P42  |     |
| chr12 | 25289551 | 25289551 | C | T | exonic          | nonsynonymous SN\ | KRAS    | NM_004985:c.G35A:p.G12D         | 0          | P42  |     |
| chr18 | 49102452 | 49102452 | A | C | exonic          | synonymous SNV    | DCC     | NM_005215:c.A2091C:p.S697S      |            | P42  |     |
| chr19 | 43672728 | 43672728 | G | A | exonic          | nonsynonymous SN\ | RYR1    | NM_000540:c.G5987A:p.R1996H     | 0.01       | P42  |     |
| chr2  | 1.7E+08  | 1.7E+08  | G | A | exonic          | synonymous SNV    | LRP2    | NM_004525:c.C9312T:p.S3104S     |            | P37  |     |
| chr2  | 1.7E+08  | 1.7E+08  | C | T | exonic          | nonsynonymous SN\ | LRP2    | NM_004525:c.G6742A:p.V2248I     | 0.46       | P37  |     |
| chr5  | 24571608 | 24571608 | G | T | exonic          | nonsynonymous SN\ | CDH10   | NM_006727:c.C607A:p.L203I       | 0.1        | P37  |     |
| chr5  | 26951609 | 26951609 | G | A | exonic          | nonsynonymous SN\ | CDH9    | NM_016279:c.C409T:p.R137W       | 0.01       | P37  |     |
| chr5  | 1.41E+08 | 1.41E+08 | G | T | exonic          | nonsynonymous SN\ | PCDHB8  | NM_019120:c.G853T:p.A285S       | 0.11       | P37  |     |
| chr6  | 1.66E+08 | 1.66E+08 | C | T | exonic          | nonsynonymous SN\ | PDE10A  | NM_001130690:c.G2338A:p.V780M   | 0.14       | P37  |     |
| chr10 | 1.34E+08 | 1.34E+08 | C | T | exonic          | nonsynonymous SN\ | LRRC27  | NM_001143757:c.C505T:p.R169W    |            | P37  |     |
| chr11 | 1.34E+08 | 1.34E+08 | G | A | exonic          | nonsynonymous SN\ | GLB1L2  | NM_138342:c.G1333A:p.G445S      |            | P37  |     |
| chr17 | 7517846  | 7517846  | G | A | exonic          | nonsynonymous SN\ | TP53    | NM_001126115:c.C421T:p.R141C    | 0          | P37  |     |
| chr17 | 51889247 | 51889247 | C | T | exonic          | nonsynonymous SN\ | ANKFN1  | NM_153228:c.C1243T:p.R415C      | 0          | P37  |     |
| chr3  | 1.42E+08 | 1.42E+08 | T | C | exonic          | nonsynonymous SN\ | CLSTN2  | NM_022131:c.T274C:p.F92L        | 0          | P39  |     |
| chr5  | 1.12E+08 | 1.12E+08 | C | T | exonic;splicing | stopgain SNV      | APC     | NM_000038:c.C646T:p.R216X       | rs62619935 | 0.19 | P39 |
| chr5  | 1.12E+08 | 1.12E+08 | G | T | exonic          | stopgain SNV      | APC     | NM_001127511:c.G4003T:p.E1335X  |            | 0.1  | P39 |
| chr5  | 1.4E+08  | 1.4E+08  | G | A | exonic          | synonymous SNV    | PCDHA13 | NM_018904:c.G1407A:p.P469P      |            | P39  |     |
| chr5  | 1.41E+08 | 1.41E+08 | C | T | exonic          | synonymous SNV    | PCDHB11 | NM_018931:c.C1089T:p.T363T      |            | P39  |     |
| chr17 | 7519242  | 7519242  | G | A | exonic          | nonsynonymous SN\ | TP53    | NM_001126115:c.C17T:p.A6V       | 0          | P39  |     |
| chr19 | 43637749 | 43637749 | G | A | exonic          | nonsynonymous SN\ | RYR1    | NM_000540:c.G1475A:p.R492H      | 0.12       | P39  |     |
| chr20 | 2724430  | 2724430  | C | T | exonic          | nonsynonymous SN\ | CPXM1   | NM_019609:c.G1535A:p.R512H      | 0.01       | P39  |     |
| chr2  | 1.9E+08  | 1.9E+08  | G | A | splicing        |                   | COL3A1  |                                 |            | P38  |     |
| chr5  | 1.12E+08 | 1.12E+08 | G | A | splicing        |                   | APC     |                                 |            | P38  |     |
| chr5  | 1.4E+08  | 1.4E+08  | C | G | exonic          | nonsynonymous SN\ | PCDHA2  | NM_018905:c.C860G:p.S287C       | 0.03       | P38  |     |
| chr5  | 1.4E+08  | 1.4E+08  | C | T | exonic          | nonsynonymous SN\ | PCDHA9  | NM_014005:c.C2024T:p.A675V      | 0.33       | P38  |     |
| chr7  | 91440964 | 91440964 | G | T | exonic          | nonsynonymous SN\ | AKAP9   | NM_005751:c.G52T:p.A18S         | 0          | P38  |     |
| chr7  | 98383794 | 98383794 | C | T | exonic          | synonymous SNV    | TRRAP   | NM_003496:c.C4488T:p.C1496C     |            | P38  |     |
| chr15 | 64516229 | 64516229 | G | A | exonic          | nonsynonymous SN\ | MAP2K1  | NM_002755:c.G383A:p.G128D       | 0.01       | P38  |     |
| chr17 | 7517845  | 7517845  | C | T | exonic          | nonsynonymous SN\ | TP53    | NM_001126115:c.G422A:p.R141H    | rs28934576 | 0.01 | P38 |
| chrX  | 47313069 | 47313069 | G | A | exonic          | nonsynonymous SN\ | ARAF    | NM_001654:c.G1085A:p.R362Q      | 0          | P38  |     |
| chr4  | 1.27E+08 | 1.27E+08 | T | A | exonic          | nonsynonymous SN\ | FAT4    | NM_024582:c.T11110A:p.F3704I    | 0.01       | P111 |     |
| chr5  | 1.12E+08 | 1.12E+08 | G | T | exonic          | stopgain SNV      | APC     | NM_001127511:c.G4003T:p.E1335X  | 0.1        | P111 |     |
| chr7  | 1E+08    | 1E+08    | A | G | exonic          | nonsynonymous SN\ | MUC17   | NM_001040105:c.A10942G:p.T3648A |            | P111 |     |
| chr7  | 1.13E+08 | 1.13E+08 | G | A | exonic          | nonsynonymous SN\ | PPP1R3A | NM_002711:c.C628T:p.R210C       | 0.12       | P111 |     |
| chr9  | 1.17E+08 | 1.17E+08 | T | G | exonic          | nonsynonymous SN\ | TNC     | NM_002160:c.A935C:p.E312A       | 0.04       | P111 |     |
| chr10 | 55252332 | 55252332 | A | T | exonic          | stopgain SNV      | PCDH15  | NM_001142767:c.T5040A:p.C1680X  | 0          | P111 |     |
| chr17 | 7517846  | 7517846  | G | A | exonic          | nonsynonymous SN\ | TP53    | NM_001126115:c.C421T:p.R141C    | 0          | P111 |     |
| chr18 | 46845900 | 46845900 | C | G | exonic          | nonsynonymous SN\ | SMAD4   | NM_005359:c.C1065G:p.D355E      | 0          | P111 |     |
| chr3  | 1.42E+08 | 1.42E+08 | C | T | exonic          | synonymous SNV    | CLSTN2  | NM_022131:c.C702T:p.T234T       |            | P153 |     |
| chr5  | 1.41E+08 | 1.41E+08 | C | T | exonic          | nonsynonymous SN\ | PCDHB13 | NM_018933:c.C803T:p.T268M       | 0.09       | P153 |     |
| chr12 | 25289551 | 25289551 | C | T | exonic          | nonsynonymous SN\ | KRAS    | NM_004985:c.G35A:p.G12D         | 0          | P153 |     |
| chr17 | 7518978  | 7518978  | C | A | exonic          | nonsynonymous SN\ | TP53    | NM_001126115:c.G200T:p.G67V     | 0.01       | P153 |     |
| chr18 | 6933341  | 6933341  | C | T | exonic          | nonsynonymous SN\ | LAMA1   | NM_005559:c.G8905A:p.A2969T     | 0.64       | P153 |     |
| chrX  | 63405188 | 63405188 | A | G | exonic          | nonsynonymous SN\ | MTMR8   | NM_017677:c.T2069C:p.I690T      | 0          | P153 |     |
| chr1  | 1.84E+08 | 1.84E+08 | T | G | exonic          | synonymous SNV    | HMCN1   | NM_031935:c.T16221G:p.S5407S    |            | P110 |     |
| chr1  | 2.14E+08 | 2.14E+08 | A | G | exonic          | nonsynonymous SN\ | USH2A   | NM_206933:c.T7649C:p.L2550S     | 0.79       | P110 |     |
| chr2  | 15616172 | 15616172 | A | G | exonic          | nonsynonymous SN\ | NBAS    | NM_015909:c.T155C:p.I52T        | 0.09       | P110 |     |

|       |          |          |   |   |                 |                   |         |                                 |           |
|-------|----------|----------|---|---|-----------------|-------------------|---------|---------------------------------|-----------|
| chr2  | 39137380 | 39137380 | T | C | exonic          | synonymous SNV    | SOS1    | NM_005633:c.A477G:p.K159K       | P110      |
| chr2  | 2.13E+08 | 2.13E+08 | A | G | exonic          | synonymous SNV    | ERBB4   | NM_001042599:c.T415C:p.L139L    | P110      |
| chr2  | 2.38E+08 | 2.38E+08 | A | G | exonic          | nonsynonymous SNV | COL6A3  | NM_057166:c.T3362C:p.V1121A     | P110      |
| chr3  | 41241141 | 41241141 | C | T | exonic          | nonsynonymous SNV | CTNNB1  | NM_001098209:c.C134T:p.S45F     | 0 P110    |
| chr3  | 1.42E+08 | 1.42E+08 | C | T | exonic          | nonsynonymous SNV | CLSTN2  | NM_022131:c.C1573T:p.R525C      | 0 P110    |
| chr3  | 1.44E+08 | 1.44E+08 | T | C | exonic;splicing | nonsynonymous SNV | ATR     | NM_0011184:c.A7760G:p.K2587R    | 0.28 P110 |
| chr3  | 1.85E+08 | 1.85E+08 | C | T | exonic          | nonsynonymous SNV | DVL3    | NM_004423:c.C958T:p.R320W       | 0 P110    |
| chr5  | 24571117 | 24571117 | C | A | exonic          | nonsynonymous SNV | CDH10   | NM_006727:c.G675T:p.M225I       | 0.01 P110 |
| chr5  | 26917393 | 26917393 | T | C | exonic          | nonsynonymous SNV | CDH9    | NM_016279:c.A1979G:p.N660S      | 0.02 P110 |
| chr5  | 1.4E+08  | 1.4E+08  | G | A | exonic          | nonsynonymous SNV | PCDHA2  | NM_018905:c.G1786A:p.A596T      | 0 P110    |
| chr5  | 1.4E+08  | 1.4E+08  | G | A | exonic          | synonymous SNV    | PCDHA10 | NM_018901:c.G1359A:p.A453A      | P110      |
| chr5  | 1.41E+08 | 1.41E+08 | C | T | exonic          | synonymous SNV    | PCDHB15 | NM_018935:c.C2184T:p.P728P      | P110      |
| chr6  | 1.3E+08  | 1.3E+08  | A | G | exonic          | nonsynonymous SNV | LAMA2   | NM_000426:c.A7132G:p.M2378V     | 0.25 P110 |
| chr6  | 1.53E+08 | 1.53E+08 | G | A | exonic          | nonsynonymous SNV | SYNE1   | NM_033071:c.C4241T:p.P1414L     | 0.42 P110 |
| chr7  | 91441094 | 91441094 | A | G | exonic          | nonsynonymous SNV | AKAP9   | NM_005751:c.A182G:p.Q61R        | 0.01 P110 |
| chr7  | 93897527 | 93897527 | T | C | exonic          | synonymous SNV    | COL1A2  | NM_000089:c.T3987C:p.I1329I     | P110      |
| chr7  | 1.03E+08 | 1.03E+08 | G | A | exonic          | stopgain SNV      | RELN    | NM_173054:c.C10351T:p.R3451X    | P110      |
| chr9  | 32621256 | 32621256 | G | C | exonic          | nonsynonymous SNV | TAF1L   | NM_153809:c.C4322G:p.T1441S     | 0.16 P110 |
| chr12 | 1.31E+08 | 1.31E+08 | C | A | exonic          | nonsynonymous SNV | EP400   | NM_015409:c.C122A:p.P41H        | 0 P110    |
| chr12 | 1.31E+08 | 1.31E+08 | G | A | exonic          | nonsynonymous SNV | EP400   | NM_015409:c.G4019A:p.R1340Q     | 0.01 P110 |
| chr15 | 26184410 | 26184410 | C | T | exonic          | nonsynonymous SNV | HERC2   | NM_004667:c.G1819A:p.D607N      | 0.05 P110 |
| chr17 | 75964245 | 75964245 | A | G | exonic          | nonsynonymous SNV | RNF213  | NM_020914:c.A13312G:p.S4438G    | P110      |
| chr18 | 49307099 | 49307099 | G | T | exonic          | nonsynonymous SNV | DCC     | NM_005215:c.G4226T:p.S1409I     | 0.1 P110  |
| chr19 | 43717699 | 43717699 | A | G | exonic;splicing | nonsynonymous SNV | RYR1    | NM_001042723:c.A11423G:p.Q3808R | P110      |
| chr20 | 44117005 | 44117005 | T | C | exonic          | nonsynonymous SNV | SLC12A5 | NM_001134771:c.T2792C:p.V931A   | 0.02 P110 |
| chrX  | 70544607 | 70544607 | T | C | exonic          | nonsynonymous SNV | TAF1    | NM_004606:c.T4325C:p.I1442T     | 0 P110    |
| chrX  | 1.52E+08 | 1.52E+08 | C | G | exonic          | nonsynonymous SNV | ATP2B3  | NM_001001344:c.C1439G:p.T480S   | 0.03 P110 |
| chrX  | 1.54E+08 | 1.54E+08 | T | C | exonic          | nonsynonymous SNV | F8      | NM_000132:c.A4627G:p.S1543G     | 0.03 P110 |
| chrX  | 1.54E+08 | 1.54E+08 | T | C | exonic          | nonsynonymous SNV | F8      | NM_000132:c.A1669G:p.N557D      | 1 P110    |
| chr1  | 11113334 | 11113334 | G | A | exonic          | nonsynonymous SNV | MTOR    | NM_004958:c.C5452T:p.R1818C     | 0 P151    |
| chr1  | 1.51E+08 | 1.51E+08 | C | A | exonic          | nonsynonymous SNV | FLG     | NM_002016:c.G2710T:p.D904Y      | 0 P151    |
| chr1  | 2.14E+08 | 2.14E+08 | T | C | exonic          | nonsynonymous SNV | USH2A   | NM_206933:c.A11627G:p.K3876R    | 0.63 P151 |
| chr2  | 15618761 | 15618761 | A | G | splicing        |                   | NBAS    |                                 | P151      |
| chr2  | 1.7E+08  | 1.7E+08  | G | A | exonic          | synonymous SNV    | LRP2    | NM_004525:c.C3312T:p.H1104H     | P151      |
| chr4  | 1.55E+08 | 1.55E+08 | C | T | exonic          | nonsynonymous SNV | DCHS2   | NM_017639:c.G2789A:p.G930E      | 0.96 P151 |
| chr5  | 24547254 | 24547254 | G | A | exonic          | nonsynonymous SNV | CDH10   | NM_006727:c.C941T:p.T314I       | 0.3 P151  |
| chr5  | 26938385 | 26938385 | G | A | exonic          | stopgain SNV      | CDH9    | NM_016279:c.C1210T:p.Q404X      | P151      |
| chr5  | 1.12E+08 | 1.12E+08 | A | G | exonic          | nonsynonymous SNV | APC     | NM_001127511:c.A7493G:p.E2498G  | 0 P151    |
| chr5  | 1.4E+08  | 1.4E+08  | C | T | exonic          | synonymous SNV    | PCDHA3  | NM_018906:c.C1119T:p.S373S      | P151      |
| chr5  | 1.4E+08  | 1.4E+08  | C | T | exonic          | synonymous SNV    | PCDHA7  | NM_018910:c.C1758T:p.G586G      | P151      |
| chr5  | 1.69E+08 | 1.69E+08 | A | G | exonic          | nonsynonymous SNV | DOCK2   | NM_004946:c.A1348G:p.M450V      | 0 P151    |
| chr6  | 90717043 | 90717043 | C | T | exonic          | synonymous SNV    | BACH2   | NM_001170794:c.G1503A:p.P501P   | P151      |
| chr6  | 1.53E+08 | 1.53E+08 | T | C | exonic          | nonsynonymous SNV | SYNE1   | NM_133650:c.A596G:p.E199G       | 0 P151    |
| chr6  | 1.53E+08 | 1.53E+08 | G | A | exonic          | nonsynonymous SNV | SYNE1   | NM_133650:c.C368T:p.A123V       | 0 P151    |
| chr7  | 37102808 | 37102808 | C | T | exonic          | nonsynonymous SNV | ELMO1   | NM_014800:c.G1241A:p.G414D      | 0.01 P151 |
| chr7  | 91498823 | 91498823 | A | G | exonic          | nonsynonymous SNV | AKAP9   | NM_005751:c.A4307G:p.Y1436C     | 0 P151    |
| chr8  | 98047408 | 98047408 | G | A | exonic          | nonsynonymous SNV | PGCP    | NM_016134:c.G919A:p.A307T       | 0.31 P151 |
| chr9  | 1.17E+08 | 1.17E+08 | G | A | exonic          | nonsynonymous SNV | TNC     | NM_002160:c.C5254T:p.P1752S     | 0.18 P151 |
| chr11 | 66955562 | 66955562 | G | A | exonic;splicing | nonsynonymous SNV | RPS6KB2 | NM_003952:c.G457A:p.G153S       | 0 P151    |
| chr11 | 1.06E+08 | 1.06E+08 | C | T | exonic          | nonsynonymous SNV | GUCY1A2 | NM_000855:c.G1864A:p.V622M      | 0 P151    |
| chr11 | 1.19E+08 | 1.19E+08 | T | G | exonic          | nonsynonymous SNV | CBL     | NM_005188:c.T1263G:p.C421W      | 0 P151    |
| chr12 | 22331412 | 22331412 | A | G | exonic          | nonsynonymous SNV | ST8SIA1 | NM_003034:c.T319C:p.Y107H       | 0 P151    |
| chr12 | 47457676 | 47457676 | A | G | exonic          | synonymous SNV    | ADCY6   | NM_015270:c.T1125C:p.H375H      | P151      |

|       |          |          |   |   |                 |                            |                                |             |      |      |
|-------|----------|----------|---|---|-----------------|----------------------------|--------------------------------|-------------|------|------|
| chr12 | 1.08E+08 | 1.08E+08 | G | A | exonic          | nonsynonymous SN\ SELPLG   | NM_003006:c.C440T;p.T147M      | rs112473865 | 0.03 | P151 |
| chr12 | 1.27E+08 | 1.27E+08 | T | C | exonic          | nonsynonymous SN\ TMEM132C | NM_001136103:c.T212C;p.L71P    |             |      | P151 |
| chr12 | 1.28E+08 | 1.28E+08 | G | A | exonic          | nonsynonymous SN\ TMEM132D | NM_133448:c.C1574T;p.P525L     |             | 0    | P151 |
| chr12 | 1.31E+08 | 1.31E+08 | G | A | exonic          | nonsynonymous SN\ EP400    | NM_015409:c.G11A;p.G4D         |             | 0    | P151 |
| chr13 | 66699757 | 66699757 | G | T | exonic          | nonsynonymous SN\ PCDH9    | NM_020403:c.C817A;p.Q273K      |             | 0.01 | P151 |
| chr16 | 23134012 | 23134012 | C | A | exonic          | nonsynonymous SN\ SCN11G   | NM_001039:c.C1671A;p.F557L     |             | 1    | P151 |
| chr17 | 7520316  | 7520316  | C | T | splicing        | TP53                       |                                |             |      | P151 |
| chr17 | 10383363 | 10383363 | C | T | exonic          | nonsynonymous SN\ MYH2     | NM_001100112:c.G1300A;p.V434I  |             | 0.85 | P151 |
| chr17 | 26577671 | 26577671 | T | C | exonic          | synonymous SNV NF1         | NM_000267:c.T2094C;p.P698P     |             |      | P151 |
| chr17 | 71234914 | 71234914 | G | A | exonic          | nonsynonymous SN\ ITGB4    | NM_001005619:c.G124A;p.V42I    |             | 1    | P151 |
| chr17 | 75961390 | 75961390 | T | C | exonic          | nonsynonymous SN\ RNF213   | NM_020914:c.T12919C;p.C4307R   |             |      | P151 |
| chr17 | 75977616 | 75977616 | T | C | exonic          | nonsynonymous SN\ RNF213   | NM_020914:c.T15196C;p.S5066P   |             |      | P151 |
| chr18 | 7023095  | 7023095  | C | A | splicing        | LAMA1                      |                                |             |      | P151 |
| chr22 | 21795528 | 21795528 | C | T | exonic          | synonymous SNV GNAZ        | NM_002073:c.C978T;p.C326C      |             |      | P151 |
| chrX  | 70514910 | 70514910 | G | T | exonic          | nonsynonymous SN\ TAF1     | NM_004606:c.G1094T;p.G365V     |             | 0    | P151 |
| chr7  | 93876840 | 93876840 | G | C | exonic          | nonsynonymous SN\ COL1A2   | NM_000089:c.G920C;p.G307A      |             | 0    | P149 |
| chr10 | 55450139 | 55450139 | C | T | exonic          | nonsynonymous SN\ PCDH15   | NM_001142765:c.G2357A;p.R786K  |             | 0.16 | P149 |
| chr17 | 7519278  | 7519278  | T | C | exonic;splicing | nonsynonymous SN\ TP53     | NM_000546:c.A377G;p.Y126C      |             | 0    | P149 |
| chr5  | 1.12E+08 | 1.12E+08 | C | T | exonic          | stopgain SNV APC           | NM_000038:c.C694T;p.R232X      |             | 0.29 | P148 |
| chr7  | 1.03E+08 | 1.03E+08 | G | A | exonic          | nonsynonymous SN\ RELN     | NM_005045:c.C449T;p.A150V      |             | 0.12 | P148 |
| chr12 | 25289551 | 25289551 | C | G | exonic          | nonsynonymous SN\ KRAS     | NM_004985:c.G35C;p.G12A        |             | 0.03 | P148 |
| chr17 | 7518264  | 7518264  | G | A | exonic          | nonsynonymous SN\ TP53     | NM_001126115:c.C346T;p.R116W   |             | 0    | P148 |
| chr5  | 82871572 | 82871572 | T | C | exonic          | synonymous SNV VCAN        | NM_001164097:c.T4033C;p.L1345L |             |      | P147 |
| chr5  | 1.12E+08 | 1.12E+08 | G | T | exonic          | stopgain SNV APC           | NM_001127511:c.G2767T;p.E923X  |             | 0.01 | P147 |
| chr5  | 1.4E+08  | 1.4E+08  | C | T | exonic          | nonsynonymous SN\ PCDHA11  | NM_018902:c.C2297T;p.T766M     |             |      | P147 |
| chr5  | 1.4E+08  | 1.4E+08  | C | A | exonic          | synonymous SNV PCDHB4      | NM_018938:c.C2319A;p.L773L     |             |      | P147 |
| chr10 | 55449976 | 55449976 | A | T | exonic          | synonymous SNV PCDH15      | NM_001142765:c.T2520A;p.T840T  |             |      | P147 |
| chr11 | 1.08E+08 | 1.08E+08 | C | A | exonic          | nonsynonymous SN\ ATM      | NM_000051:c.C7305A;p.N2435K    |             | 0.06 | P147 |
| chr12 | 25271543 | 25271543 | T | A | exonic          | nonsynonymous SN\ KRAS     | NM_004985:c.A182T;p.Q61L       |             | 0    | P147 |
| chr17 | 3607146  | 3607146  | G | A | exonic          | nonsynonymous SN\ ITGAE    | NM_002208:c.C1052T;p.A351V     |             | 0.53 | P147 |
| chr10 | 55747042 | 55747042 | T | A | exonic          | nonsynonymous SN\ PCDH15   | NM_001142767:c.A760T;p.T254S   |             | 0.35 | P146 |
| chr3  | 41249903 | 41249903 | G | T | exonic          | nonsynonymous SN\ CTNNB1   | NM_001098209:c.G1149T;p.W383C  |             | 0.09 | P141 |
| chr4  | 1.26E+08 | 1.26E+08 | A | G | exonic          | nonsynonymous SN\ FAT4     | NM_024582:c.A4714G;p.T1572A    |             |      | P141 |
| chr5  | 1.41E+08 | 1.41E+08 | G | A | exonic          | synonymous SNV PCDHB10     | NM_018930:c.G1092A;p.P364P     |             |      | P141 |
| chr12 | 25289551 | 25289551 | C | T | exonic          | nonsynonymous SN\ KRAS     | NM_004985:c.G35A;p.G12D        |             | 0    | P141 |
| chr15 | 65260776 | 65260776 | C | T | exonic          | nonsynonymous SN\ SMAD3    | NM_001145104:c.C217T;p.R73C    |             | 0    | P141 |
| chr17 | 7517845  | 7517845  | C | A | exonic          | nonsynonymous SN\ TP53     | NM_001126115:c.G422T;p.R141L   |             | 0    | P141 |
| chr3  | 1.53E+08 | 1.53E+08 | G | A | exonic          | nonsynonymous SN\ IGSF10   | NM_178822:c.C3014T;p.P1005L    |             | 0    | P35  |
| chr6  | 1.53E+08 | 1.53E+08 | C | T | exonic          | nonsynonymous SN\ SYNE1    | NM_033071:c.G13075A;p.A4359T   |             | 0.46 | P35  |
| chr7  | 91545086 | 91545086 | G | A | exonic          | synonymous SNV AKAP9       | NM_005751:c.G6906A;p.T2302T    |             |      | P35  |
| chr12 | 1.08E+08 | 1.08E+08 | C | T | exonic          | synonymous SNV ACACB       | NM_001093:c.C3906T;p.I1302I    |             |      | P35  |
| chr17 | 7517747  | 7517747  | G | A | exonic          | stopgain SNV TP53          | NM_001126115:c.C520T;p.R174X   |             | 0.15 | P35  |
| chr5  | 26926376 | 26926376 | T | C | exonic          | synonymous SNV CDH9        | NM_016279:c.A1308G;p.E436E     |             |      | P36  |
| chr5  | 1.4E+08  | 1.4E+08  | G | A | exonic          | synonymous SNV PCDHA7      | NM_018910:c.G1686A;p.A562A     |             |      | P36  |
| chr5  | 1.51E+08 | 1.51E+08 | C | T | exonic          | synonymous SNV FAT2        | NM_001447:c.G4548A;p.S1516S    |             |      | P36  |
| chr15 | 32873026 | 32873026 | C | T | exonic          | nonsynonymous SN\ ACTC1    | NM_005159:c.G166A;p.V56I       |             |      | P36  |
| chr17 | 7519131  | 7519131  | C | T | exonic          | nonsynonymous SN\ TP53     | NM_001126115:c.G128A;p.R43H    | rs28934578  | 0    | P36  |
| chr12 | 5999057  | 5999057  | G | A | exonic          | nonsynonymous SN\ VWF      | NM_000552:c.C3788T;p.S1263L    |             | 0.51 | P29  |
| chr17 | 7517747  | 7517747  | G | A | exonic          | stopgain SNV TP53          | NM_001126115:c.C520T;p.R174X   |             | 0.15 | P29  |
| chr1  | 1.51E+08 | 1.51E+08 | G | A | exonic          | nonsynonymous SN\ FLG      | NM_002016:c.C10144T;p.R3382C   |             | 0.01 | P30  |
| chr2  | 39103509 | 39103509 | T | C | exonic          | nonsynonymous SN\ SOS1     | NM_005633:c.A1564G;p.N522D     |             | 0.13 | P30  |
| chr2  | 1.7E+08  | 1.7E+08  | A | T | exonic          | nonsynonymous SN\ LRP2     | NM_004525:c.T12191A;p.I4064N   |             | 0    | P30  |
| chr5  | 1.12E+08 | 1.12E+08 | A | T | exonic          | stopgain SNV APC           | NM_001127511:c.A3868T;p.K1290X |             | 0.22 | P30  |

|       |          |          |   |   |                 |                   |          |                                |            |           |
|-------|----------|----------|---|---|-----------------|-------------------|----------|--------------------------------|------------|-----------|
| chr5  | 1.4E+08  | 1.4E+08  | G | A | exonic          | synonymous SNV    | PCDHB5   | NM_015669:c.G1473A:p.P491P     |            | P30       |
| chr7  | 1.28E+08 | 1.28E+08 | C | T | exonic          | synonymous SNV    | FLNC     | NM_001127487:c.C6699T;p.I2233I |            | P30       |
| chr9  | 1.17E+08 | 1.17E+08 | C | T | exonic          | nonsynonymous SNV | TNC      | NM_002160:c.G3047A:p.R1016H    | 0.04       | P30       |
| chr12 | 5931936  | 5931936  | G | A | exonic          | nonsynonymous SNV | VWF      | NM_000552:c.C7997T;p.T2666M    | rs78353028 | 0 P30     |
| chr13 | 66698343 | 66698343 | G | T | exonic          | nonsynonymous SNV | PCDH9    | NM_020403:c.C2231A:p.T744N     |            | 0.08 P30  |
| chr15 | 26095748 | 26095748 | G | A | exonic          | synonymous SNV    | HERC2    | NM_004667:c.C9375T;p.L3125L    |            | P30       |
| chr17 | 7518334  | 7518334  | C | G | splicing        |                   | TP53     |                                |            | P30       |
| chr2  | 15344682 | 15344682 | T | C | exonic          | nonsynonymous SNV | NBAS     | NM_015909:c.A5104G:p.M1702V    |            | 0.01 P31  |
| chr5  | 1.12E+08 | 1.12E+08 | G | T | exonic          | stopgain SNV      | APC      | NM_001127511:c.G3046T;p.E1016X |            | 0 P31     |
| chr5  | 1.4E+08  | 1.4E+08  | C | T | exonic          | synonymous SNV    | PCDHA2   | NM_018905:c.C1725T;p.G575G     |            | P31       |
| chr5  | 1.69E+08 | 1.69E+08 | C | A | exonic          | nonsynonymous SNV | DOCK2    | NM_004946:c.C2535A:p.S845R     |            | 0.01 P31  |
| chr7  | 1.52E+08 | 1.52E+08 | C | T | exonic          | nonsynonymous SNV | MLL3     | NM_170606:c.G10A;p.E4K         |            | 0 P31     |
| chr12 | 1.08E+08 | 1.08E+08 | A | C | exonic          | nonsynonymous SNV | ACACB    | NM_001093:c.A7111C:p.K2371Q    |            | P31       |
| chr15 | 65260834 | 65260834 | G | C | exonic          | nonsynonymous SNV | SMAD3    | NM_001145104:c.G275C;p.R92P    |            | 0 P31     |
| chr17 | 7517845  | 7517845  | C | T | exonic          | nonsynonymous SNV | TP53     | NM_001126115:c.G422A;p.R141H   | rs28934576 | 0.01 P31  |
| chr1  | 46305198 | 46305198 | A | G | exonic          | nonsynonymous SNV | PIK3R3   | NM_003629:c.T467C:p.L156P      |            | 0 P140    |
| chr1  | 1.84E+08 | 1.84E+08 | G | A | exonic          | nonsynonymous SNV | HMCN1    | NM_031935:c.G15527A;p.R5176H   |            | 0.21 P140 |
| chr1  | 2.14E+08 | 2.14E+08 | G | A | exonic          | synonymous SNV    | USH2A    | NM_206933:c.C9582T;p.N3194N    |            | P140      |
| chr1  | 2.15E+08 | 2.15E+08 | G | A | exonic          | synonymous SNV    | USH2A    | NM_007123:c.C1560T;p.C520C     |            | P140      |
| chr2  | 15451820 | 15451820 | G | A | exonic          | nonsynonymous SNV | NBAS     | NM_015909:c.C3239T;p.T1080M    |            | 0.14 P140 |
| chr2  | 2.02E+08 | 2.02E+08 | C | T | exonic          | synonymous SNV    | CASP8    | NM_001080125:c.C705T;p.N235N   |            | P140      |
| chr2  | 2.38E+08 | 2.38E+08 | G | A | exonic          | synonymous SNV    | COL6A3   | NM_057166:c.C3891T;p.D1297D    |            | P140      |
| chr2  | 2.38E+08 | 2.38E+08 | G | A | exonic          | nonsynonymous SNV | COL6A3   | NM_004369:c.C575T;p.P192L      |            | P140      |
| chr3  | 58110638 | 58110638 | C | T | exonic          | nonsynonymous SNV | FLNB     | NM_001164319:c.C6041T;p.A2014V |            | 0 P140    |
| chr5  | 7855414  | 7855414  | C | T | exonic          | synonymous SNV    | ADCY2    | NM_020546:c.C2712T;p.D904D     | rs35218680 | P140      |
| chr5  | 1.12E+08 | 1.12E+08 | C | T | exonic          | stopgain SNV      | APC      | NM_001127511:c.C667T;p.R223X   |            | 0 P140    |
| chr5  | 1.12E+08 | 1.12E+08 | A | G | exonic;splicing | nonsynonymous SNV | APC      | NM_001127511:c.A1903G;p.R635G  |            | 0.01 P140 |
| chr5  | 1.31E+08 | 1.31E+08 | G | A | exonic          | nonsynonymous SNV | ACSL6    | NM_001205251:c.C1526T;p.A509V  |            | 0.1 P140  |
| chr5  | 1.38E+08 | 1.38E+08 | C | T | exonic          | synonymous SNV    | CTNNA1   | NM_001903:c.C1167T;p.H389H     | rs61736921 | P140      |
| chr5  | 1.4E+08  | 1.4E+08  | G | A | exonic          | synonymous SNV    | PCDHA5   | NM_018908:c.G1626A:p.P542P     |            | P140      |
| chr5  | 1.4E+08  | 1.4E+08  | C | T | exonic          | synonymous SNV    | PCDHA6   | NM_018909:c.C2055T;p.G685G     |            | P140      |
| chr5  | 1.4E+08  | 1.4E+08  | G | A | exonic          | nonsynonymous SNV | PCDHA6   | NM_018909:c.G2107A:p.A703T     |            | 0 P140    |
| chr5  | 1.4E+08  | 1.4E+08  | G | A | exonic          | synonymous SNV    | PCDHA8   | NM_018911:c.G2265A;p.P755P     |            | P140      |
| chr5  | 1.4E+08  | 1.4E+08  | C | T | exonic          | synonymous SNV    | PCDHB2   | NM_018936:c.C678T;p.G226G      |            | P140      |
| chr5  | 1.41E+08 | 1.41E+08 | A | G | exonic          | nonsynonymous SNV | PCDHB15  | NM_018935:c.A2246G;p.Y749C     |            | 0.05 P140 |
| chr5  | 1.69E+08 | 1.69E+08 | G | A | exonic          | nonsynonymous SNV | DOCK2    | NM_004946:c.G4045A;p.G1349S    |            | 0 P140    |
| chr6  | 1.69E+08 | 1.69E+08 | G | A | exonic          | nonsynonymous SNV | THBS2    | NM_003247:c.C1988T;p.A663V     |            | 0.03 P140 |
| chr7  | 1.13E+08 | 1.13E+08 | C | A | exonic          | nonsynonymous SNV | PPP1R3A  | NM_002711:c.G1823T;p.S608I     |            | 0 P140    |
| chr7  | 1.52E+08 | 1.52E+08 | G | T | exonic          | nonsynonymous SNV | MLL3     | NM_170606:c.C8045A;p.S2682Y    |            | 0 P140    |
| chr8  | 52936129 | 52936129 | A | G | exonic          | nonsynonymous SNV | PCMTD1   | NM_052937:c.T136C;p.Y46H       |            | 0.41 P140 |
| chr9  | 90842984 | 90842984 | G | T | exonic          | nonsynonymous SNV | SHC3     | NM_016848:c.C1400A;p.P467H     |            | 0 P140    |
| chr9  | 1.17E+08 | 1.17E+08 | G | A | exonic          | nonsynonymous SNV | TNC      | NM_002160:c.C4655T;p.S1552L    |            | 0.12 P140 |
| chr9  | 1.37E+08 | 1.37E+08 | G | A | exonic          | nonsynonymous SNV | COL5A1   | NM_000093:c.G409A;p.V137I      |            | 0.19 P140 |
| chr10 | 51249253 | 51249253 | C | T | exonic          | nonsynonymous SNV | NCOA4    | NM_001145262:c.C106T;p.R36W    |            | 0 P140    |
| chr11 | 1.34E+08 | 1.34E+08 | C | T | exonic          | synonymous SNV    | GLB1L2   | NM_138342:c.C1095T;p.F365F     |            | P140      |
| chr12 | 25269914 | 25269914 | T | A | exonic          | nonsynonymous SNV | KRAS     | NM_004985:c.A351T;p.K117N      |            | 0 P140    |
| chr12 | 1.28E+08 | 1.28E+08 | C | T | exonic;splicing | synonymous SNV    | TMEM132D | NM_133448:c.G1650A;p.R550R     |            | P140      |
| chr12 | 1.31E+08 | 1.31E+08 | G | A | exonic          | nonsynonymous SNV | EP400    | NM_015409:c.G3617A;p.R1206H    |            | 0 P140    |
| chr12 | 1.31E+08 | 1.31E+08 | C | T | exonic          | synonymous SNV    | EP400    | NM_015409:c.C4980T;p.G1660G    |            | P140      |
| chr12 | 1.31E+08 | 1.31E+08 | G | A | exonic          | nonsynonymous SNV | EP400    | NM_015409:c.G5062A;p.G1688R    |            | 0.21 P140 |
| chr12 | 1.31E+08 | 1.31E+08 | C | T | exonic          | stopgain SNV      | EP400    | NM_015409:c.C7126T;p.R2376X    |            | 0 P140    |
| chr14 | 49696451 | 49696451 | C | A | exonic          | nonsynonymous SNV | SOS2     | NM_006939:c.G1300T;p.D434Y     |            | 0 P140    |
| chr15 | 26198969 | 26198969 | C | T | exonic          | nonsynonymous SNV | HERC2    | NM_004667:c.G382A;p.V128I      |            | 0.3 P140  |

|       |          |          |   |   |                 |                   |         |                                |                     |
|-------|----------|----------|---|---|-----------------|-------------------|---------|--------------------------------|---------------------|
| chr15 | 67134731 | 67134731 | G | A | exonic          | nonsynonymous SN\ | NOX5    | NM_001184779:c.G1919A:p.R640H  | P140                |
| chr15 | 67134799 | 67134799 | C | T | exonic          | stopgain SNV      | NOX5    | NM_001184779:c.C1987T:p.Q663X  | P140                |
| chr16 | 3997559  | 3997559  | A | C | exonic;splicing | synonymous SNV    | ADCY9   | NM_0011116:c.T1695G;p.G565G    | P140                |
| chr17 | 7517846  | 7517846  | G | A | exonic          | nonsynonymous SN\ | TP53    | NM_001126115:c.C421T;p.R141C   | 0 P140              |
| chr17 | 10163151 | 10163151 | C | T | exonic          | nonsynonymous SN\ | MYH13   | NM_003802:c.G3419A;p.R1140H    | 0 P140              |
| chr17 | 71244317 | 71244317 | G | A | exonic          | nonsynonymous SN\ | ITGB4   | NM_001005619:c.G1937A:p.R646H  | 0.02 P140           |
| chr17 | 71245077 | 71245077 | C | T | exonic          | synonymous SNV    | ITGB4   | NM_001005619:c.C2070T;p.G690G  | P140                |
| chr17 | 71264686 | 71264686 | C | T | exonic          | synonymous SNV    | ITGB4   | NM_001005619:c.C5070T;p.S1690S | P140                |
| chr17 | 75922525 | 75922525 | G | A | exonic          | nonsynonymous SN\ | RNF213  | NM_020914:c.G4316A;p.R1439H    | P140                |
| chr17 | 75934568 | 75934568 | G | A | exonic          | nonsynonymous SN\ | RNF213  | NM_020914:c.G7985A;p.R2662H    | 0.14 P140           |
| chr17 | 75956172 | 75956172 | G | A | exonic          | synonymous SNV    | RNF213  | NM_020914:c.G12048A;p.T4016T   | P140                |
| chr18 | 46845902 | 46845902 | C | T | exonic          | nonsynonymous SN\ | SMAD4   | NM_005359:c.C1067T;p.P356L     | 0 P140              |
| chr18 | 61632729 | 61632729 | G | A | exonic          | synonymous SNV    | CDH7    | NM_004361:c.G534A;p.T178T      | P140                |
| chr19 | 47177958 | 47177958 | G | A | exonic          | synonymous SNV    | ATP1A3  | NM_152296:c.C1134T;p.V378V     | P140                |
| chr21 | 45713046 | 45713046 | G | A | exonic          | nonsynonymous SN\ | COL18A1 | NM_030582:c.G1109A;p.R370Q     | 0.01 P140           |
| chr21 | 45741993 | 45741993 | C | T | exonic          | synonymous SNV    | COL18A1 | NM_030582:c.C3213T;p.P1071P    | P140                |
| chrX  | 1.38E+08 | 1.38E+08 | A | C | exonic          | synonymous SNV    | FGF13   | NM_004114:c.T408G;p.L136L      | P140                |
| chr3  | 58130547 | 58130547 | C | T | exonic          | synonymous SNV    | FLNB    | NM_001164319:c.C7536T;p.D2512D | P32                 |
| chr6  | 90699133 | 90699133 | C | T | exonic          | synonymous SNV    | BACH2   | NM_001170794:c.G2241A;p.A747A  | P32                 |
| chr12 | 25289551 | 25289551 | C | A | exonic          | nonsynonymous SN\ | KRAS    | NM_004985:c.G35T;p.G12V        | 0 P32               |
| chr17 | 7519131  | 7519131  | C | T | exonic          | nonsynonymous SN\ | TP53    | NM_001126115:c.G128A;p.R43H    | rs28934578 0 P32    |
| chr12 | 25289551 | 25289551 | C | T | exonic          | nonsynonymous SN\ | KRAS    | NM_004985:c.G35A;p.G12D        | 0 P33               |
| chrX  | 32744548 | 32744548 | C | T | exonic          | stopgain SNV      | DMD     | NM_004007:c.G119A;p.W40X       | 0 P33               |
| chr3  | 1.42E+08 | 1.42E+08 | G | A | exonic          | nonsynonymous SN\ | CLSTN2  | NM_022131:c.G2297A;p.R766H     | 0.09 P34            |
| chr4  | 1.26E+08 | 1.26E+08 | C | T | exonic          | nonsynonymous SN\ | FAT4    | NM_024582:c.C905T;p.T302M      | P34                 |
| chr4  | 1.26E+08 | 1.26E+08 | G | T | exonic          | nonsynonymous SN\ | FAT4    | NM_024582:c.G4612T;p.D1538Y    | P34                 |
| chr5  | 82851338 | 82851338 | C | T | exonic          | nonsynonymous SN\ | VCAN    | NM_001164098:c.C1457T;p.S486L  | 0 P34               |
| chr5  | 1.12E+08 | 1.12E+08 | G | T | exonic          | stopgain SNV      | APC     | NM_001127511:c.G3808T;p.G1270X | 0.01 P34            |
| chr5  | 1.4E+08  | 1.4E+08  | C | T | exonic          | nonsynonymous SN\ | PCDHA2  | NM_018905:c.C2036T;p.S679L     | 0.29 P34            |
| chr5  | 1.41E+08 | 1.41E+08 | G | A | exonic          | nonsynonymous SN\ | PCDHB14 | NM_018934:c.G14A;p.G5E         | 0.54 P34            |
| chr6  | 1.3E+08  | 1.3E+08  | G | A | exonic          | nonsynonymous SN\ | LAMA2   | NM_000426:c.G3676A;p.E1226K    | 0.76 P34            |
| chr6  | 1.47E+08 | 1.47E+08 | G | A | exonic          | nonsynonymous SN\ | GRM1    | NM_000838:c.G1339A;p.G447S     | 0 P34               |
| chr6  | 1.53E+08 | 1.53E+08 | G | A | exonic          | nonsynonymous SN\ | SYNE1   | NM_033071:c.C529T;p.R177W      | 0 P34               |
| chr7  | 1.13E+08 | 1.13E+08 | C | A | exonic          | stopgain SNV      | PPP1R3A | NM_002711:c.G1237T;p.G413X     | P34                 |
| chr8  | 1.09E+08 | 1.09E+08 | C | T | exonic          | nonsynonymous SN\ | RSP02   | NM_178565:c.G257A;p.R86Q       | 0 P34               |
| chr9  | 1.37E+08 | 1.37E+08 | G | A | exonic          | nonsynonymous SN\ | COL5A1  | NM_000093:c.G5041A;p.V1681I    | 0.75 P34            |
| chr10 | 55582995 | 55582995 | G | A | exonic          | nonsynonymous SN\ | PCDH15  | NM_001142767:c.C1544T;p.A515V  | 0.01 P34            |
| chr10 | 55582996 | 55582996 | C | T | exonic          | nonsynonymous SN\ | PCDH15  | NM_001142767:c.G1543A;p.A515T  | 0.03 P34            |
| chr10 | 1.27E+08 | 1.27E+08 | C | T | exonic          | nonsynonymous SN\ | CTBP2   | NM_022802:c.G418A;p.G140R      | 0 P34               |
| chr16 | 60408951 | 60408951 | C | A | exonic          | nonsynonymous SN\ | CDH8    | NM_001796:c.G1210T;p.A404S     | 0.01 P34            |
| chr17 | 7517845  | 7517845  | C | T | exonic          | nonsynonymous SN\ | TP53    | NM_001126115:c.G422A;p.R141H   | rs28934576 0.01 P34 |
| chr1  | 45042611 | 45042611 | G | C | exonic          | synonymous SNV    | PLK3    | NM_004073:c.G1356C;p.P452P     | rs11211036 P46      |
| chr1  | 70224605 | 70224605 | T | C | exonic          | synonymous SNV    | LRRC7   | NM_020794:c.T765C;p.L255L      | rs17131103 P46      |
| chr1  | 1.51E+08 | 1.51E+08 | C | T | exonic          | nonsynonymous SN\ | FLG     | NM_002016:c.G11722A;p.D3908N   | rs3814300 0 P46     |
| chr1  | 1.51E+08 | 1.51E+08 | G | A | exonic          | synonymous SNV    | FLG     | NM_002016:c.C1791T;p.S597S     | P46                 |
| chr1  | 1.57E+08 | 1.57E+08 | T | C | exonic          | synonymous SNV    | SPTA1   | NM_003126:c.A7095G;p.A2365A    | rs2251969 P46       |
| chr1  | 1.57E+08 | 1.57E+08 | G | A | exonic          | synonymous SNV    | SPTA1   | NM_003126:c.C5958T;p.P1986P    | rs3753068 P46       |
| chr1  | 1.57E+08 | 1.57E+08 | G | C | exonic          | nonsynonymous SN\ | SPTA1   | NM_003126:c.C5572G;p.L1858V    | rs3737515 0.01 P46  |
| chr1  | 1.57E+08 | 1.57E+08 | A | G | exonic          | nonsynonymous SN\ | SPTA1   | NM_003126:c.T4702C;p.C1568R    | rs863931 0.95 P46   |
| chr1  | 1.57E+08 | 1.57E+08 | C | T | exonic          | synonymous SNV    | SPTA1   | NM_003126:c.G2874A;p.L958L     | rs857691 P46        |
| chr1  | 1.57E+08 | 1.57E+08 | A | C | exonic          | synonymous SNV    | SPTA1   | NM_003126:c.T2493G;p.L831L     | rs2518493 P46       |
| chr1  | 1.58E+08 | 1.58E+08 | T | G | exonic          | nonsynonymous SN\ | ATP1A4  | NM_144699:c.T1622G;p.M541R     | rs16831482 0.28 P46 |
| chr1  | 2.14E+08 | 2.14E+08 | G | C | exonic          | nonsynonymous SN\ | USH2A   | NM_206933:c.C6628G;p.P2210A    | 1 P46               |

|      |          |          |   |   |        |                           |                               |             |      |     |
|------|----------|----------|---|---|--------|---------------------------|-------------------------------|-------------|------|-----|
| chr1 | 2.14E+08 | 2.14E+08 | A | G | exonic | nonsynonymous SN\ USH2A   | NM_206933:c.T6317C;p.I2106T   | rs6657250   | 0.87 | P46 |
| chr1 | 2.46E+08 | 2.46E+08 | T | A | exonic | stopgain SNV OR2M5        | NM_001004690:c.T914A;p.L305X  | rs77689140  | 0    | P46 |
| chr1 | 2.46E+08 | 2.46E+08 | G | A | exonic | synonymous SNV OR2M3      | NM_001004689:c.G333A;p.E111E  | rs4916112   |      | P46 |
| chr2 | 15388299 | 15388299 | C | T | exonic | synonymous SNV NBAS       | NM_015909:c.G4221A;p.L1407L   | rs34395824  |      | P46 |
| chr2 | 15518892 | 15518892 | C | T | exonic | synonymous SNV NBAS       | NM_015909:c.G2223A;p.L741L    | rs7590340   |      | P46 |
| chr2 | 15525293 | 15525293 | T | C | exonic | nonsynonymous SN\ NBAS    | NM_015909:c.A1964G;p.K655R    | rs4668909   | 0.64 | P46 |
| chr2 | 15531855 | 15531855 | T | C | exonic | synonymous SNV NBAS       | NM_015909:c.A1386G;p.R462R    | rs13014906  |      | P46 |
| chr2 | 15533361 | 15533361 | A | G | exonic | synonymous SNV NBAS       | NM_015909:c.T1242C;p.S414S    | rs1990754   |      | P46 |
| chr2 | 15592137 | 15592137 | T | C | exonic | nonsynonymous SN\ NBAS    | NM_015909:c.A727G;p.I243V     | rs13029846  | 0.09 | P46 |
| chr2 | 15618861 | 15618861 | C | G | exonic | nonsynonymous SN\ NBAS    | NM_015909:c.G19C;p.G7R        |             | 0.02 | P46 |
| chr2 | 99145563 | 99145563 | T | C | exonic | synonymous SNV LIPT1      | NM_145199:c.T711C;p.A237A     | rs2516835   |      | P46 |
| chr2 | 1.7E+08  | 1.7E+08  | C | T | exonic | nonsynonymous SN\ LRP2    | NM_004525:c.G8614A;p.A2872T   | rs2228171   | 0.12 | P46 |
| chr2 | 1.9E+08  | 1.9E+08  | G | A | exonic | nonsynonymous SN\ COL3A1  | NM_000090:c.G2092A;p.A698T    | rs1800255   | 0.17 | P46 |
| chr2 | 2.12E+08 | 2.12E+08 | T | C | exonic | synonymous SNV ERBB4      | NM_001042599:c.A3147G;p.V1049 | rs3748962   |      | P46 |
| chr2 | 2.38E+08 | 2.38E+08 | G | A | exonic | nonsynonymous SN\ COL6A3  | NM_057166:c.C7385T;p.T2462I   | rs1131296   |      | P46 |
| chr2 | 2.38E+08 | 2.38E+08 | C | T | exonic | synonymous SNV COL6A3     | NM_057166:c.G6108A;p.A2036A   | rs4433949   |      | P46 |
| chr2 | 2.38E+08 | 2.38E+08 | C | T | exonic | nonsynonymous SN\ COL6A3  | NM_057166:c.G3074A;p.R1025Q   | rs111231885 |      | P46 |
| chr2 | 2.38E+08 | 2.38E+08 | C | A | exonic | synonymous SNV COL6A3     | NM_057166:c.G2712T;p.G904G    | rs2645774   |      | P46 |
| chr2 | 2.38E+08 | 2.38E+08 | A | G | exonic | synonymous SNV COL6A3     | NM_057166:c.T2490C;p.I830I    | rs2646260   |      | P46 |
| chr2 | 2.38E+08 | 2.38E+08 | C | T | exonic | synonymous SNV COL6A3     | NM_057164:c.G3081A;p.S1027S   | rs3791000   |      | P46 |
| chr2 | 2.38E+08 | 2.38E+08 | T | G | exonic | nonsynonymous SN\ COL6A3  | NM_057166:c.A1441C;p.K481Q    | rs11896521  |      | P46 |
| chr2 | 2.38E+08 | 2.38E+08 | G | A | exonic | synonymous SNV COL6A3     | NM_057166:c.C1308T;p.G436G    | rs12622093  |      | P46 |
| chr2 | 2.38E+08 | 2.38E+08 | C | A | exonic | nonsynonymous SN\ COL6A3  | NM_057164:c.G1267T;p.A423S    | rs77181645  |      | P46 |
| chr2 | 2.38E+08 | 2.38E+08 | C | T | exonic | nonsynonymous SN\ COL6A3  | NM_057164:c.G1198A;p.A400T    | rs113155945 |      | P46 |
| chr3 | 41255831 | 41255831 | C | T | exonic | synonymous SNV CTNNB1     | NM_001098209:c.C2340T;p.D780C | rs2293303   |      | P46 |
| chr3 | 1.44E+08 | 1.44E+08 | A | G | exonic | synonymous SNV ATR        | NM_0011184:c.T5208C;p.Y1736Y  | rs2227931   |      | P46 |
| chr3 | 1.44E+08 | 1.44E+08 | A | G | exonic | synonymous SNV ATR        | NM_0011184:c.T1815C;p.D605D   | rs2227929   |      | P46 |
| chr3 | 1.88E+08 | 1.88E+08 | T | C | exonic | nonsynonymous SN\ KNG1    | NM_000893:c.T533C;p.M178T     | rs1656922   | 0.8  | P46 |
| chr4 | 47783297 | 47783297 | G | A | exonic | nonsynonymous SN\ TXK     | NM_003328:c.C899T;p.A300V     | rs34574349  | 0.13 | P46 |
| chr4 | 54824835 | 54824835 | T | C | exonic | synonymous SNV PDGFRA     | NM_006206:c.T612C;p.N204N     | rs2229307   |      | P46 |
| chr4 | 54828483 | 54828483 | T | G | exonic | synonymous SNV PDGFRA     | NM_006206:c.T939G;p.G313G     | rs4358459   |      | P46 |
| chr4 | 54834528 | 54834528 | T | C | exonic | nonsynonymous SN\ PDGFRA  | NM_006206:c.T1432C;p.S478P    | rs35597368  | 0.31 | P46 |
| chr4 | 54838334 | 54838334 | G | A | exonic | synonymous SNV PDGFRA     | NM_006206:c.G1809A;p.A603A    | rs10028020  |      | P46 |
| chr4 | 54846797 | 54846797 | C | T | exonic | synonymous SNV PDGFRA     | NM_006206:c.C2472T;p.V824V    | rs2228230   |      | P46 |
| chr4 | 82311894 | 82311894 | A | G | exonic | synonymous SNV PRKG2      | NM_006259:c.T717C;p.N239N     | rs17005080  |      | P46 |
| chr4 | 1.26E+08 | 1.26E+08 | C | T | exonic | nonsynonymous SN\ FAT4    | NM_024582:c.C2420T;p.A807V    | rs1039808   |      | P46 |
| chr4 | 1.26E+08 | 1.26E+08 | G | A | exonic | nonsynonymous SN\ FAT4    | NM_024582:c.G2914A;p.G972S    |             |      | P46 |
| chr4 | 1.26E+08 | 1.26E+08 | T | C | exonic | synonymous SNV FAT4       | NM_024582:c.T2944C;p.L982L    | rs2940779   |      | P46 |
| chr4 | 1.26E+08 | 1.26E+08 | C | T | exonic | synonymous SNV FAT4       | NM_024582:c.C4305T;p.I1435I   | rs2710555   |      | P46 |
| chr4 | 1.27E+08 | 1.27E+08 | G | A | exonic | nonsynonymous SN\ FAT4    | NM_024582:c.G10571A;p.G3524D  | rs1567047   | 0.06 | P46 |
| chr4 | 1.27E+08 | 1.27E+08 | A | C | exonic | nonsynonymous SN\ FAT4    | NM_024582:c.A10804C;p.I3602L  | rs76491994  | 0.04 | P46 |
| chr4 | 1.55E+08 | 1.55E+08 | G | A | exonic | nonsynonymous SN\ DCHS2   | NM_017639:c.C8027T;p.P2676L   | rs61746132  | 0.02 | P46 |
| chr4 | 1.55E+08 | 1.55E+08 | C | T | exonic | nonsynonymous SN\ DCHS2   | NM_017639:c.G4783A;p.E1595K   | rs28561984  | 1    | P46 |
| chr4 | 1.55E+08 | 1.55E+08 | A | G | exonic | synonymous SNV DCHS2      | NM_017639:c.T4740C;p.D1580D   | rs17031387  |      | P46 |
| chr4 | 1.57E+08 | 1.57E+08 | C | T | exonic | synonymous SNV GUCY1A3    | NM_001130684:c.C1008T;p.S336S |             |      | P46 |
| chr5 | 82851776 | 82851776 | C | T | exonic | nonsynonymous SN\ VCAN    | NM_001164098:c.C1895T;p.T632M |             | 0    | P46 |
| chr5 | 1.4E+08  | 1.4E+08  | A | T | exonic | nonsynonymous SN\ PCDHAC1 | NM_018898:c.A1097T;p.D366V    |             | 0    | P46 |
| chr5 | 1.4E+08  | 1.4E+08  | G | A | exonic | nonsynonymous SN\ PCDHB3  | NM_018937:c.G619A;p.E207K     | rs12515688  | 0.08 | P46 |
| chr5 | 1.4E+08  | 1.4E+08  | A | T | exonic | nonsynonymous SN\ PCDHB3  | NM_018937:c.A1242T;p.R414S    | rs3733699   | 0.21 | P46 |
| chr5 | 1.41E+08 | 1.41E+08 | T | C | exonic | nonsynonymous SN\ PCDHB8  | NM_019120:c.T2299C;p.F767L    | rs2740583   | 0.04 | P46 |
| chr6 | 12404241 | 12404241 | G | T | exonic | nonsynonymous SN\ EDN1    | NM_001168319:c.G591T;p.K197N  | rs5370      | 0.02 | P46 |
| chr6 | 1.29E+08 | 1.29E+08 | C | T | exonic | synonymous SNV LAMA2      | NM_000426:c.C156T;p.I52I      | rs1140366   |      | P46 |
| chr6 | 1.3E+08  | 1.3E+08  | G | T | exonic | nonsynonymous SN\ LAMA2   | NM_000426:c.G2217T;p.W739C    |             | 0.02 | P46 |

|       |          |          |   |   |                 |                   |         |                                |             |      |     |
|-------|----------|----------|---|---|-----------------|-------------------|---------|--------------------------------|-------------|------|-----|
| chr6  | 1.3E+08  | 1.3E+08  | A | G | exonic          | synonymous SNV    | LAMA2   | NM_000426:c.A2799G;p.Q933Q     | rs1027199   |      | P46 |
| chr6  | 1.3E+08  | 1.3E+08  | G | A | exonic;splicing | nonsynonymous SNV | LAMA2   | NM_000426:c.G3412A;p.V1138M    | rs2306942   | 0.09 | P46 |
| chr6  | 1.3E+08  | 1.3E+08  | G | A | exonic          | synonymous SNV    | LAMA2   | NM_000426:c.G6237A;p.T2079T    | rs2297738   |      | P46 |
| chr6  | 1.3E+08  | 1.3E+08  | G | A | exonic          | synonymous SNV    | LAMA2   | NM_001079823:c.G7833A;p.P2611  | rs2229850   |      | P46 |
| chr6  | 1.53E+08 | 1.53E+08 | T | C | exonic          | synonymous SNV    | SYNE1   | NM_133650:c.A1479G;p.E493E     | rs2747662   |      | P46 |
| chr6  | 1.53E+08 | 1.53E+08 | C | G | exonic          | nonsynonymous SNV | SYNE1   | NM_133650:c.G1454C;p.G485A     | rs2252755   | 0.52 | P46 |
| chr6  | 1.53E+08 | 1.53E+08 | C | T | exonic          | synonymous SNV    | SYNE1   | NM_133650:c.G1311A;p.P437P     | rs2252748   |      | P46 |
| chr6  | 1.53E+08 | 1.53E+08 | G | A | exonic          | nonsynonymous SNV | SYNE1   | NM_033071:c.C16064T;p.T5355M   | rs2306914   | 0.08 | P46 |
| chr6  | 1.53E+08 | 1.53E+08 | G | C | exonic          | synonymous SNV    | SYNE1   | NM_033071:c.C15384G;p.A5128A   | rs9383987   |      | P46 |
| chr6  | 1.53E+08 | 1.53E+08 | G | A | exonic          | nonsynonymous SNV | SYNE1   | NM_033071:c.C7640T;p.T2547M    |             | 0.01 | P46 |
| chr6  | 1.53E+08 | 1.53E+08 | A | G | exonic          | nonsynonymous SNV | SYNE1   | NM_033071:c.T3125C;p.V1042A    | rs214976    | 0.02 | P46 |
| chr6  | 1.66E+08 | 1.66E+08 | T | C | exonic          | synonymous SNV    | PDE10A  | NM_001130690:c.A204G;p.S68S    | rs9459421   |      | P46 |
| chr6  | 1.69E+08 | 1.69E+08 | G | A | exonic          | synonymous SNV    | THBS2   | NM_003247:c.C2007T;p.G669G     | rs35935937  |      | P46 |
| chr7  | 37265325 | 37265325 | C | T | exonic          | synonymous SNV    | ELMO1   | NM_014800:c.G399A;p.V133V      | rs2717968   |      | P46 |
| chr7  | 47935452 | 47935452 | C | A | exonic          | nonsynonymous SNV | PKD1L1  | NM_138295:c.G934T;p.V312F      | rs2686817   | 0    | P46 |
| chr7  | 91468556 | 91468556 | G | T | exonic          | nonsynonymous SNV | AKAP9   | NM_005751:c.G1389T;p.M463I     | rs6964587   | 0.38 | P46 |
| chr7  | 91529537 | 91529537 | C | T | exonic          | synonymous SNV    | AKAP9   | NM_005751:c.C5778T;p.G1926G    | rs10236397  |      | P46 |
| chr7  | 91550634 | 91550634 | A | G | exonic          | nonsynonymous SNV | AKAP9   | NM_005751:c.A8375G;p.N2792S    | rs6960867   | 0.34 | P46 |
| chr7  | 91551908 | 91551908 | C | T | exonic          | synonymous SNV    | AKAP9   | NM_005751:c.C8665T;p.L2889L    | rs10228334  |      | P46 |
| chr7  | 91553598 | 91553598 | C | T | exonic          | synonymous SNV    | AKAP9   | NM_005751:c.C9145T;p.L3049L    | rs28927678  |      | P46 |
| chr7  | 91564863 | 91564863 | A | C | exonic          | synonymous SNV    | AKAP9   | NM_005751:c.A10426C;p.R3476R   | rs1063243   |      | P46 |
| chr7  | 1E+08    | 1E+08    | G | A | exonic          | nonsynonymous SNV | MUC17   | NM_001040105:c.G431A;p.G144D   | rs76440115  |      | P46 |
| chr7  | 1E+08    | 1E+08    | A | C | exonic          | nonsynonymous SNV | MUC17   | NM_001040105:c.A679C;p.K227Q   | rs10229731  |      | P46 |
| chr7  | 1E+08    | 1E+08    | C | T | exonic          | nonsynonymous SNV | MUC17   | NM_001040105:c.C1016T;p.T339M  | rs4729645   |      | P46 |
| chr7  | 1E+08    | 1E+08    | C | T | exonic          | nonsynonymous SNV | MUC17   | NM_001040105:c.C3170T;p.S1057F |             | 0.03 | P46 |
| chr7  | 1E+08    | 1E+08    | C | T | exonic          | nonsynonymous SNV | MUC17   | NM_001040105:c.C3476T;p.T1159  | rs77274379  | 0.05 | P46 |
| chr7  | 1E+08    | 1E+08    | T | C | exonic          | nonsynonymous SNV | MUC17   | NM_001040105:c.T4043C;p.L1348I | rs4269454   |      | P46 |
| chr7  | 1E+08    | 1E+08    | A | C | exonic          | synonymous SNV    | MUC17   | NM_001040105:c.A5841C;p.S1947  | rs78512922  |      | P46 |
| chr7  | 1E+08    | 1E+08    | G | A | exonic          | nonsynonymous SNV | MUC17   | NM_001040105:c.G6286A;p.A2096  | rs28593004  |      | P46 |
| chr7  | 1E+08    | 1E+08    | A | G | exonic          | nonsynonymous SNV | MUC17   | NM_001040105:c.A6475G;p.R2155I | rs28555173  |      | P46 |
| chr7  | 1E+08    | 1E+08    | T | G | exonic          | nonsynonymous SNV | MUC17   | NM_001040105:c.T8353G;p.S2785  | rs74403802  |      | P46 |
| chr7  | 1E+08    | 1E+08    | C | T | exonic          | nonsynonymous SNV | MUC17   | NM_001040105:c.C9167T;p.T3056  | rs77120544  |      | P46 |
| chr7  | 1.03E+08 | 1.03E+08 | T | C | exonic          | synonymous SNV    | RELN    | NM_005045:c.A10074G;p.A3358A   | rs1062831   |      | P46 |
| chr7  | 1.03E+08 | 1.03E+08 | A | G | exonic          | synonymous SNV    | RELN    | NM_005045:c.T7110C;p.V2370V    | rs362746    |      | P46 |
| chr7  | 1.03E+08 | 1.03E+08 | T | C | exonic          | synonymous SNV    | RELN    | NM_005045:c.A1776G;p.E592E     | rs2072403   |      | P46 |
| chr7  | 1.13E+08 | 1.13E+08 | C | A | exonic          | nonsynonymous SNV | PPP1R3A | NM_002711:c.G2713T;p.D905Y     | rs1799999   | 0    | P46 |
| chr7  | 1.28E+08 | 1.28E+08 | T | C | exonic          | synonymous SNV    | FLNC    | NM_001127487:c.T5664C;p.T1888  | rs3816884   |      | P46 |
| chr7  | 1.28E+08 | 1.28E+08 | C | T | exonic          | synonymous SNV    | FLNC    | NM_001127487:c.C7122T;p.D2374  | rs3816885   |      | P46 |
| chr7  | 1.54E+08 | 1.54E+08 | C | T | exonic          | synonymous SNV    | PAXIP1  | NM_007349:c.G1245A;p.P415P     | rs61752011  |      | P46 |
| chr8  | 41910440 | 41910440 | G | A | exonic          | synonymous SNV    | MYST3   | NM_006766:c.C4455T;p.S1485S    | rs3739365   |      | P46 |
| chr8  | 41917574 | 41917574 | C | T | exonic          | synonymous SNV    | MYST3   | NM_006766:c.G2982A;p.P994P     | rs3824275   |      | P46 |
| chr8  | 42025252 | 42025252 | A | G | exonic          | nonsynonymous SNV | MYST3   | NM_006766:c.T401C;p.L134S      | rs3824276   | 0.03 | P46 |
| chr8  | 97961300 | 97961300 | C | G | exonic          | nonsynonymous SNV | PGCP    | NM_016134:c.C740G;p.S247C      |             | 0.05 | P46 |
| chr9  | 1.17E+08 | 1.17E+08 | C | G | exonic          | nonsynonymous SNV | TNC     | NM_002160:c.G6022C;p.E2008Q    | rs13321     | 0.64 | P46 |
| chr9  | 1.17E+08 | 1.17E+08 | T | C | exonic          | synonymous SNV    | TNC     | NM_002160:c.A5673G;p.R1891R    | rs12347433  |      | P46 |
| chr9  | 1.17E+08 | 1.17E+08 | T | A | exonic          | nonsynonymous SNV | TNC     | NM_002160:c.A5029T;p.I1677L    | rs2104772   | 0.69 | P46 |
| chr9  | 1.17E+08 | 1.17E+08 | C | T | exonic          | nonsynonymous SNV | TNC     | NM_002160:c.G1813A;p.V605I     | rs3827816   | 0.16 | P46 |
| chr10 | 5232164  | 5232164  | A | G | exonic          | synonymous SNV    | AKR1C4  | NM_001818:c.A105G;p.V35V       | rs17306779  |      | P46 |
| chr10 | 5237784  | 5237784  | C | G | exonic          | nonsynonymous SNV | AKR1C4  | NM_001818:c.C434G;p.S145C      | rs3829125   | 0.54 | P46 |
| chr10 | 5250682  | 5250682  | C | G | exonic;splicing | nonsynonymous SNV | AKR1C4  | NM_001818:c.C931G;p.L311V      | rs17134592  | 0.52 | P46 |
| chr10 | 35969137 | 35969137 | G | A | exonic          | synonymous SNV    | FZD8    | NM_031866:c.C1227T;p.A409A     | rs74989785  |      | P46 |
| chr10 | 1.06E+08 | 1.06E+08 | T | C | exonic          | nonsynonymous SNV | COL17A1 | NM_000494:c.A4109G;p.D1370G    | rs17116350  | 0.49 | P46 |
| chr10 | 1.06E+08 | 1.06E+08 | C | T | exonic          | nonsynonymous SNV | COL17A1 | NM_000494:c.G2755A;p.D919N     | rs117564807 | 0.06 | P46 |

|       |          |          |   |   |          |                   |          |                                 |             |      |     |
|-------|----------|----------|---|---|----------|-------------------|----------|---------------------------------|-------------|------|-----|
| chr10 | 1.06E+08 | 1.06E+08 | G | A | exonic   | nonsynonymous SNV | COL17A1  | NM_000494:c.C1642T;p.L548F      |             | 0    | P46 |
| chr10 | 1.27E+08 | 1.27E+08 | G | A | exonic   | nonsynonymous SNV | CTBP2    | NM_022802:c.C125T;p.T42M        |             | 0    | P46 |
| chr10 | 1.29E+08 | 1.29E+08 | T | C | exonic   | synonymous SNV    | DOCK1    | NM_001380:c.T4482C;p.I1494I     | rs2229600   |      | P46 |
| chr11 | 66957395 | 66957395 | C | T | exonic   | synonymous SNV    | RPS6KB2  | NM_003952:c.C807T;p.F269F       | rs4930427   |      | P46 |
| chr11 | 66958732 | 66958732 | C | T | exonic   | nonsynonymous SNV | RPS6KB2  | NM_003952:c.C1259T;p.A420V      | rs13859     |      | P46 |
| chr11 | 1.08E+08 | 1.08E+08 | G | A | exonic   | nonsynonymous SNV | ATM      | NM_000051:c.G5362A;p.G1788S     |             | 0.61 | P46 |
| chr11 | 1.08E+08 | 1.08E+08 | T | C | exonic   | synonymous SNV    | ATM      | NM_000051:c.T6108C;p.Y2036Y     | rs3092826   |      | P46 |
| chr11 | 1.34E+08 | 1.34E+08 | C | G | exonic   | synonymous SNV    | GLB1L2   | NM_138342:c.C1680G;p.T560T      | rs3741097   |      | P46 |
| chr12 | 7179223  | 7179223  | C | T | exonic   | synonymous SNV    | CLSTN3   | NM_014718:c.C417T;p.N139N       | rs34933247  |      | P46 |
| chr12 | 22245981 | 22245981 | G | A | exonic   | synonymous SNV    | ST8SIA1  | NM_003034:c.C843T;p.S281S       |             |      | P46 |
| chr12 | 46813453 | 46813453 | C | T | exonic   | synonymous SNV    | PFKM     | NM_001166688:c.C516T;p.T172T    | rs1049392   |      | P46 |
| chr12 | 74023862 | 74023862 | T | C | exonic   | synonymous SNV    | GLIPR1L1 | NM_152779:c.T297C;p.N99N        | rs56713198  |      | P46 |
| chr12 | 94656026 | 94656026 | A | G | exonic   | nonsynonymous SNV | NTN4     | NM_021229:c.T613C;p.Y205H       | rs17288108  | 0.49 | P46 |
| chr12 | 1.08E+08 | 1.08E+08 | C | T | exonic   | synonymous SNV    | ACACB    | NM_001093:c.C525T;p.S175S       | rs2878960   |      | P46 |
| chr12 | 1.08E+08 | 1.08E+08 | A | G | exonic   | nonsynonymous SNV | ACACB    | NM_001093:c.A1654G;p.I552V      | rs16940029  | 1    | P46 |
| chr12 | 1.08E+08 | 1.08E+08 | C | T | exonic   | synonymous SNV    | ACACB    | NM_001093:c.C2184T;p.G728G      | rs7135947   |      | P46 |
| chr12 | 1.08E+08 | 1.08E+08 | C | T | exonic   | synonymous SNV    | ACACB    | NM_001093:c.C6204T;p.H2068H     | rs3742023   |      | P46 |
| chr13 | 46307738 | 46307738 | G | A | exonic   | synonymous SNV    | HTR2A    | NM_001165947:c.C399T;p.D133D    |             |      | P46 |
| chr14 | 19735630 | 19735630 | T | A | exonic   | nonsynonymous SNV | OR11G2   | NM_001005503:c.T296A;p.I99N     | rs4981822   | 0.01 | P46 |
| chr15 | 26086467 | 26086467 | G | A | exonic   | synonymous SNV    | HERC2    | NM_004667:c.C10515T;p.A3505A    | rs61756152  |      | P46 |
| chr15 | 67111013 | 67111013 | C | G | exonic   | nonsynonymous SNV | NOX5     | NM_001184779:c.C343G;p.P115A    | rs78571685  |      | P46 |
| chr15 | 75131848 | 75131848 | T | A | exonic   | synonymous SNV    | TSPAN3   | NM_001168412:c.A411T;p.V137V    | rs11737     |      | P46 |
| chr16 | 4105070  | 4105070  | G | A | exonic   | synonymous SNV    | ADCY9    | NM_0011116:c.C375T;p.F125F      |             |      | P46 |
| chr17 | 3607103  | 3607103  | A | G | exonic   | synonymous SNV    | ITGAE    | NM_002208:c.T1095C;p.H365H      |             |      | P46 |
| chr17 | 10244986 | 10244986 | G | A | exonic   | synonymous SNV    | MYH8     | NM_002472:c.C3270T;p.I1090I     | rs3744552   |      | P46 |
| chr17 | 43109423 | 43109423 | C | T | exonic   | synonymous SNV    | KPNB1    | NM_002265:c.C2034T;p.C678C      | rs72628350  |      | P46 |
| chr17 | 75920466 | 75920466 | G | A | exonic   | nonsynonymous SNV | RNF213   | NM_020914:c.G3730A;p.V1244M     | rs10782008  |      | P46 |
| chr17 | 75920697 | 75920697 | G | C | exonic   | nonsynonymous SNV | RNF213   | NM_020914:c.G3961C;p.E1321Q     | rs9913636   |      | P46 |
| chr17 | 75920875 | 75920875 | A | G | exonic   | nonsynonymous SNV | RNF213   | NM_020914:c.A4139G;p.D1380G     | rs8074015   |      | P46 |
| chr17 | 75920903 | 75920903 | C | G | exonic   | synonymous SNV    | RNF213   | NM_020914:c.C4167G;p.V1389V     | rs9908287   |      | P46 |
| chr17 | 75926103 | 75926103 | G | A | exonic   | synonymous SNV    | RNF213   | NM_020914:c.G4797A;p.A1599A     | rs4890009   |      | P46 |
| chr17 | 75933731 | 75933731 | G | A | exonic   | nonsynonymous SNV | RNF213   | NM_020914:c.G7148A;p.S2383N     | rs9674961   | 0.44 | P46 |
| chr17 | 75933975 | 75933975 | G | C | exonic   | synonymous SNV    | RNF213   | NM_020914:c.G7392C;p.P2464P     | rs4890012   |      | P46 |
| chr17 | 75952924 | 75952924 | C | T | exonic   | synonymous SNV    | RNF213   | NM_020914:c.C11994T;p.T3998T    | rs117705614 |      | P46 |
| chr18 | 6967844  | 6967844  | A | G | exonic   | nonsynonymous SNV | LAMA1    | NM_005559:c.T6227C;p.I2076T     | rs671871    | 0.67 | P46 |
| chr18 | 6975270  | 6975270  | C | T | exonic   | nonsynonymous SNV | LAMA1    | NM_005559:c.G5626A;p.A1876T     | rs11664063  | 0.57 | P46 |
| chr18 | 6976259  | 6976259  | G | A | exonic   | synonymous SNV    | LAMA1    | NM_005559:c.C5256T;p.H1752H     | rs62081531  |      | P46 |
| chr18 | 6983673  | 6983673  | T | C | exonic   | nonsynonymous SNV | LAMA1    | NM_005559:c.A4975G;p.H659V      | rs62081533  | 0.75 | P46 |
| chr18 | 6987818  | 6987818  | A | C | exonic   | nonsynonymous SNV | LAMA1    | NM_005559:c.T4729G;p.S1577A     | rs12961939  | 0    | P46 |
| chr18 | 6989628  | 6989628  | T | C | exonic   | synonymous SNV    | LAMA1    | NM_005559:c.A4479G;p.S1493S     | rs625106    |      | P46 |
| chr18 | 49190992 | 49190992 | T | C | exonic   | synonymous SNV    | DCC      | NM_005215:c.T3108C;p.P1036P     | rs34395300  |      | P46 |
| chr18 | 49239635 | 49239635 | G | A | exonic   | nonsynonymous SNV | DCC      | NM_005215:c.G3428A;p.G1143D     |             | 0.01 | P46 |
| chr19 | 43682296 | 43682296 | C | T | exonic   | synonymous SNV    | RYR1     | NM_000540:c.C7209T;p.R2403R     | rs78795178  |      | P46 |
| chr19 | 43743846 | 43743846 | G | A | exonic   | nonsynonymous SNV | RYR1     | NM_001042723:c.G12521A;p.R4174H |             |      | P46 |
| chr19 | 59939815 | 59939815 | G | C | splicing |                   | KIR3DL3  |                                 |             |      | P46 |
| chr19 | 60069820 | 60069820 | C | T | exonic   | nonsynonymous SNV | KIR3DL2  | NM_006737:c.C1190T;p.T397M      | rs3745902   | 0.01 | P46 |
| chr19 | 61102034 | 61102034 | C | T | exonic   | synonymous SNV    | NLRP13   | NM_176810:c.G2871A;p.L957L      | rs302827    |      | P46 |
| chr19 | 61116344 | 61116344 | G | A | exonic   | synonymous SNV    | NLRP13   | NM_176810:c.C651T;p.R217R       | rs731338    |      | P46 |
| chr20 | 23369079 | 23369079 | A | G | exonic   | nonsynonymous SNV | CSTL1    | NM_138283:c.A175G;p.T59A        | rs7361799   | 0.03 | P46 |
| chr20 | 44113819 | 44113819 | C | T | exonic   | synonymous SNV    | SLC12A5  | NM_001134771:c.C2349T;p.S783S   | rs3746522   |      | P46 |
| chr20 | 44115150 | 44115150 | C | T | exonic   | nonsynonymous SNV | SLC12A5  | NM_001134771:c.C2594T;p.P865L   |             | 0.05 | P46 |
| chr20 | 58015195 | 58015195 | C | G | exonic   | synonymous SNV    | CDH26    | NM_021810:c.C252G;p.L84L        | rs7267644   |      | P46 |
| chr21 | 45722229 | 45722229 | G | A | exonic   | synonymous SNV    | COL18A1  | NM_030582:c.G1683A;p.A561A      | rs2230689   |      | P46 |

|       |          |          |   |   |          |                           |                               |            |      |     |
|-------|----------|----------|---|---|----------|---------------------------|-------------------------------|------------|------|-----|
| chr21 | 45731795 | 45731795 | A | G | exonic   | nonsynonymous SN\ COL18A1 | NM_030582:c.A2380G:p.M794V    |            |      | P46 |
| chrX  | 32290988 | 32290988 | C | G | exonic   | nonsynonymous SN\ DMD     | NM_004011:c.G11440C:p.K380N   | rs72468630 | 0.21 | P46 |
| chrX  | 32413115 | 32413115 | T | C | exonic   | nonsynonymous SN\ DMD     | NM_004007:c.A2276G:p.D759G    | rs228406   | 0.58 | P46 |
| chrX  | 1.52E+08 | 1.52E+08 | G | C | exonic   | synonymous SNV ATP2B3     | NM_001001344:c.G2592C:p.V864\ | rs2269415  |      | P46 |
| chr1  | 1.58E+08 | 1.58E+08 | T | A | exonic   | synonymous SNV ATP1A4     | NM_144699:c.T2562A:p.R854R    |            |      | P60 |
| chr1  | 1.84E+08 | 1.84E+08 | T | C | exonic   | synonymous SNV HMCN1      | NM_031935:c.T4857C:p.H1619H   | rs6665753  |      | P60 |
| chr1  | 2.14E+08 | 2.14E+08 | C | T | exonic   | synonymous SNV USH2A      | NM_206933:c.G13191A:p.E4397E  | rs2009923  |      | P60 |
| chr1  | 2.14E+08 | 2.14E+08 | T | C | exonic   | nonsynonymous SN\ USH2A   | NM_206933:c.A9595G:p.N3199D   | rs4129843  | 0.36 | P60 |
| chr1  | 2.14E+08 | 2.14E+08 | T | C | exonic   | nonsynonymous SN\ USH2A   | NM_206933:c.A9343G:p.T3115A   | rs56032526 | 0.52 | P60 |
| chr1  | 2.14E+08 | 2.14E+08 | G | A | exonic   | nonsynonymous SN\ USH2A   | NM_206933:c.C8656T:p.L2886F   | rs41277200 | 0.76 | P60 |
| chr1  | 2.15E+08 | 2.15E+08 | G | A | exonic   | synonymous SNV USH2A      | NM_007123:c.C1419T:p.T473T    | rs1805050  |      | P60 |
| chr1  | 2.46E+08 | 2.46E+08 | A | G | exonic   | nonsynonymous SN\ OR2M5   | NM_001004690:c.A907G:p.K303E  | rs73141283 | 0.01 | P60 |
| chr1  | 2.46E+08 | 2.46E+08 | C | T | exonic   | nonsynonymous SN\ OR2M3   | NM_001004689:c.C781T:p.R261W  |            | 0.03 | P60 |
| chr1  | 2.47E+08 | 2.47E+08 | C | T | exonic   | synonymous SNV OR2M7      | NM_001004691:c.G855A:p.L285L  | rs4451579  |      | P60 |
| chr2  | 39148291 | 39148291 | T | G | exonic   | synonymous SNV SOS1       | NM_005633:c.A195C:p.R65R      | rs7609455  |      | P60 |
| chr2  | 1.05E+08 | 1.05E+08 | G | A | exonic   | synonymous SNV FHL2       | NM_001450:c.C804T:p.D268D     | rs3087523  |      | P60 |
| chr2  | 1.7E+08  | 1.7E+08  | C | T | exonic   | synonymous SNV LRP2       | NM_004525:c.G10503A:p.Q3501Q  | rs2229265  |      | P60 |
| chr2  | 1.7E+08  | 1.7E+08  | G | C | exonic   | synonymous SNV LRP2       | NM_004525:c.C7626G:p.R2542R   | rs13397109 |      | P60 |
| chr2  | 1.7E+08  | 1.7E+08  | T | C | exonic   | synonymous SNV LRP2       | NM_004525:c.A3660G:p.A1220A   | rs831042   |      | P60 |
| chr2  | 1.7E+08  | 1.7E+08  | T | C | exonic   | synonymous SNV LRP2       | NM_004525:c.A3069G:p.T1023T   | rs831043   |      | P60 |
| chr2  | 1.7E+08  | 1.7E+08  | T | C | exonic   | synonymous SNV LRP2       | NM_004525:c.A2460G:p.T820T    | rs2241190  |      | P60 |
| chr2  | 2.38E+08 | 2.38E+08 | C | T | exonic   | synonymous SNV COL6A3     | NM_057166:c.G5775A:p.K1925K   | rs2291795  |      | P60 |
| chr3  | 8750661  | 8750661  | C | T | exonic   | synonymous SNV CAV3       | NM_001234:c.C99T:p.N33N       | rs1008642  |      | P60 |
| chr3  | 1.25E+08 | 1.25E+08 | T | C | splicing | MYLK                      |                               | rs6438804  |      | P60 |
| chr3  | 1.25E+08 | 1.25E+08 | A | G | exonic   | synonymous SNV MYLK       | NM_053026:c.T4635C:p.N1545N   | rs820463   |      | P60 |
| chr3  | 1.44E+08 | 1.44E+08 | C | T | exonic   | nonsynonymous SN\ ATR     | NM_001184:c.G4052A:p.R1351Q   |            | 0.09 | P60 |
| chr3  | 1.53E+08 | 1.53E+08 | G | A | exonic   | synonymous SNV IGSF10     | NM_001178145:c.C810T:p.N270N  | rs6781302  |      | P60 |
| chr4  | 25026207 | 25026207 | T | A | exonic   | synonymous SNV ANAPC4     | NM_013367:c.T1848A:p.I616I    | rs3214035  |      | P60 |
| chr4  | 25028381 | 25028381 | T | C | exonic   | synonymous SNV ANAPC4     | NM_013367:c.T2121C:p.F707F    | rs9174     |      | P60 |
| chr4  | 1.26E+08 | 1.26E+08 | G | A | exonic   | synonymous SNV FAT4       | NM_024582:c.G831A:p.A277A     |            |      | P60 |
| chr4  | 1.27E+08 | 1.27E+08 | C | T | exonic   | nonsynonymous SN\ FAT4    | NM_024582:c.C10564T:p.R3522W  |            | 0.01 | P60 |
| chr4  | 1.27E+08 | 1.27E+08 | C | T | exonic   | synonymous SNV FAT4       | NM_024582:c.C14355T:p.V4785V  | rs1014865  |      | P60 |
| chr4  | 1.27E+08 | 1.27E+08 | C | T | exonic   | nonsynonymous SN\ FAT4    | NM_024582:c.C14914T:p.P4972S  | rs1014867  | 0.45 | P60 |
| chr4  | 1.55E+08 | 1.55E+08 | G | A | exonic   | nonsynonymous SN\ DCHS2   | NM_017639:c.C3614T:p.S1205L   | rs11935573 | 0.01 | P60 |
| chr4  | 1.55E+08 | 1.55E+08 | A | G | exonic   | synonymous SNV DCHS2      | NM_001142552:c.T2556C:p.G852C | rs6858157  |      | P60 |
| chr4  | 1.56E+08 | 1.56E+08 | A | G | exonic   | nonsynonymous SN\ DCHS2   | NM_017639:c.T458C:p.V153A     | rs11721758 | 0.06 | P60 |
| chr5  | 24523765 | 24523765 | G | A | exonic   | nonsynonymous SN\ CDH10   | NM_006727:c.C2131T:p.R711W    |            | 0.02 | P60 |
| chr5  | 34944634 | 34944634 | T | C | exonic   | nonsynonymous SN\ RAD1    | NM_002853:c.A842G:p.E281G     | rs1805327  | 0.03 | P60 |
| chr5  | 34951705 | 34951705 | A | G | exonic   | synonymous SNV BRX1       | NM_018321:c.A105G:p.T35T      | rs2069465  |      | P60 |
| chr5  | 82843828 | 82843828 | C | T | exonic   | nonsynonymous SN\ VCAN    | NM_001126336:c.C899T:p.S300L  | rs2652098  | 0    | P60 |
| chr5  | 1.12E+08 | 1.12E+08 | C | T | exonic   | stopgain SNV APC          | NM_001127511:c.C2572T:p.R858X |            | 0.03 | P60 |
| chr5  | 1.4E+08  | 1.4E+08  | A | G | exonic   | nonsynonymous SN\ PCDHA4  | NM_018907:c.A2227G:p.S743G    |            | 0.02 | P60 |
| chr5  | 1.4E+08  | 1.4E+08  | C | T | exonic   | nonsynonymous SN\ PCDHA7  | NM_018910:c.C1688T:p.P563L    |            | 0    | P60 |
| chr5  | 1.4E+08  | 1.4E+08  | G | C | exonic   | nonsynonymous SN\ PCDHA9  | NM_014005:c.G1288C:p.G430R    | rs251355   | 0.28 | P60 |
| chr5  | 1.4E+08  | 1.4E+08  | C | T | exonic   | synonymous SNV PCDHA9     | NM_014005:c.C1353T:p.N451N    |            |      | P60 |
| chr5  | 1.4E+08  | 1.4E+08  | A | C | exonic   | nonsynonymous SN\ PCDHA9  | NM_014005:c.A2290C:p.K764Q    | rs369636   | 0.04 | P60 |
| chr5  | 1.4E+08  | 1.4E+08  | A | C | exonic   | nonsynonymous SN\ PCDHA9  | NM_014005:c.A2291C:p.K764T    | rs369639   | 0.62 | P60 |
| chr5  | 1.4E+08  | 1.4E+08  | A | G | exonic   | nonsynonymous SN\ PCDHA10 | NM_018901:c.A1915G:p.T639A    | rs630162   |      | P60 |
| chr5  | 1.4E+08  | 1.4E+08  | G | A | exonic   | nonsynonymous SN\ PCDHA10 | NM_018901:c.G2012A:p.G671D    | rs17844348 |      | P60 |
| chr5  | 1.4E+08  | 1.4E+08  | G | A | exonic   | nonsynonymous SN\ PCDHB2  | NM_018936:c.G382A:p.V128I     | rs31853    | 1    | P60 |
| chr5  | 1.4E+08  | 1.4E+08  | A | G | exonic   | nonsynonymous SN\ PCDHB3  | NM_018937:c.A122G:p.K41R      | rs31849    | 0.83 | P60 |
| chr5  | 1.4E+08  | 1.4E+08  | A | G | exonic   | synonymous SNV PCDHB3     | NM_018937:c.A345G:p.Q115Q     | rs17844387 |      | P60 |
| chr5  | 1.4E+08  | 1.4E+08  | G | A | exonic   | nonsynonymous SN\ PCDHB4  | NM_018938:c.G1261A:p.A421T    | rs3776099  | 1    | P60 |

|       |          |          |   |   |        |                   |          |                                |             |      |     |
|-------|----------|----------|---|---|--------|-------------------|----------|--------------------------------|-------------|------|-----|
| chr5  | 1.4E+08  | 1.4E+08  | C | T | exonic | nonsynonymous SNV | PCDHB4   | NM_018938:c.C1951T;p.R651C     | rs17844417  | 0    | P60 |
| chr5  | 1.41E+08 | 1.41E+08 | T | A | exonic | synonymous SNV    | PCDHB11  | NM_018931:c.T1146A;p.V382V     | rs3733688   |      | P60 |
| chr5  | 1.41E+08 | 1.41E+08 | G | A | exonic | synonymous SNV    | PCDHB11  | NM_018931:c.G2217A;p.V739V     |             |      | P60 |
| chr5  | 1.41E+08 | 1.41E+08 | C | T | exonic | nonsynonymous SNV | PCDHB12  | NM_018932:c.C1259T;p.T420I     | rs2910327   | 0    | P60 |
| chr5  | 1.41E+08 | 1.41E+08 | A | G | exonic | nonsynonymous SNV | PCDHB12  | NM_018932:c.A2287G;p.K763E     | rs2910006   | 1    | P60 |
| chr5  | 1.51E+08 | 1.51E+08 | A | G | exonic | nonsynonymous SNV | FAT2     | NM_001447:c.T1490C;p.I497T     |             | 0.01 | P60 |
| chr5  | 1.69E+08 | 1.69E+08 | C | A | exonic | synonymous SNV    | DOCK2    | NM_004946:c.C1212A;p.T404T     | rs2112703   |      | P60 |
| chr5  | 1.69E+08 | 1.69E+08 | T | C | exonic | synonymous SNV    | DOCK2    | NM_004946:c.T4896C;p.R1632R    | rs1045168   |      | P60 |
| chr6  | 1.3E+08  | 1.3E+08  | T | C | exonic | synonymous SNV    | LAMA2    | NM_000426:c.T1491C;p.C497C     | rs2306220   |      | P60 |
| chr6  | 1.3E+08  | 1.3E+08  | C | T | exonic | nonsynonymous SNV | LAMA2    | NM_001079823:c.C7748T;p.A2583  | rs6569605   | 0.6  | P60 |
| chr6  | 1.52E+08 | 1.52E+08 | T | C | exonic | synonymous SNV    | SYNE1    | NM_133650:c.A2853G;p.P951P     |             |      | P60 |
| chr6  | 1.53E+08 | 1.53E+08 | G | A | exonic | synonymous SNV    | SYNE1    | NM_015293:c.C1317T;p.H439H     | rs12664753  |      | P60 |
| chr6  | 1.53E+08 | 1.53E+08 | C | G | exonic | synonymous SNV    | SYNE1    | NM_033071:c.G13848C;p.L4616L   | rs3734365   |      | P60 |
| chr6  | 1.53E+08 | 1.53E+08 | G | A | exonic | nonsynonymous SNV | SYNE1    | NM_033071:c.C8405T;p.A2802V    | rs214950    | 0.03 | P60 |
| chr6  | 1.69E+08 | 1.69E+08 | G | A | exonic | synonymous SNV    | THBS2    | NM_003247:c.C3075T;p.A1025A    | rs9505895   |      | P60 |
| chr7  | 98420514 | 98420514 | T | G | exonic | synonymous SNV    | TRRAP    | NM_003496:c.T9225G;p.V3075V    |             |      | P60 |
| chr7  | 1.03E+08 | 1.03E+08 | G | C | exonic | nonsynonymous SNV | LAMA2    | NM_005045:c.C2989G;p.L997V     | rs362691    | 0.86 | P60 |
| chr7  | 1.28E+08 | 1.28E+08 | C | T | exonic | synonymous SNV    | FLNC     | NM_001127487:c.C147T;p.H49H    | rs3734972   |      | P60 |
| chr7  | 1.51E+08 | 1.51E+08 | G | T | exonic | nonsynonymous SNV | MLL3     | NM_170606:c.C11374A;p.Q3792K   | rs75191113  | 0    | P60 |
| chr8  | 52908706 | 52908706 | C | T | exonic | synonymous SNV    | PCMTD1   | NM_052937:c.G507A;p.V169V      | rs9298462   |      | P60 |
| chr9  | 1.17E+08 | 1.17E+08 | C | T | exonic | nonsynonymous SNV | TNC      | NM_002160:c.G5341A;p.A1781T    | rs2274750   | 0.02 | P60 |
| chr9  | 1.17E+08 | 1.17E+08 | T | C | exonic | synonymous SNV    | TNC      | NM_002160:c.A5202G;p.T1734T    | rs1061495   |      | P60 |
| chr9  | 1.17E+08 | 1.17E+08 | A | G | exonic | nonsynonymous SNV | TNC      | NM_002160:c.T4142C;p.V1381A    |             | 0.09 | P60 |
| chr9  | 1.17E+08 | 1.17E+08 | C | T | exonic | synonymous SNV    | TNC      | NM_002160:c.G195A;p.S65S       | rs10982521  |      | P60 |
| chr9  | 1.37E+08 | 1.37E+08 | C | T | exonic | synonymous SNV    | COL5A1   | NM_000093:c.C573T;p.L191L      | rs116715381 |      | P60 |
| chr9  | 1.37E+08 | 1.37E+08 | C | T | exonic | synonymous SNV    | COL5A1   | NM_000093:c.C1092T;p.P364P     | rs41306391  |      | P60 |
| chr10 | 55425497 | 55425497 | C | T | exonic | nonsynonymous SNV | PCDH15   | NM_001142765:c.G2573A;p.R858C  | rs2135720   | 0.42 | P60 |
| chr10 | 56093974 | 56093974 | A | C | exonic | nonsynonymous SNV | PCDH15   | NM_001142763:c.T55G;p.S19A     | rs11004439  | 0.04 | P60 |
| chr10 | 95269496 | 95269496 | A | T | exonic | nonsynonymous SNV | CEP55    | NM_001127182:c.A1133T;p.H378L  | rs2293277   | 0.13 | P60 |
| chr10 | 1.06E+08 | 1.06E+08 | A | C | exonic | nonsynonymous SNV | COL17A1  | NM_000494:c.T3085G;p.S1029A    | rs118166857 | 0.32 | P60 |
| chr10 | 1.16E+08 | 1.16E+08 | T | A | exonic | nonsynonymous SNV | C10orf81 | NM_001193435:c.T205A;p.F69I    | rs41292632  | 0.16 | P60 |
| chr10 | 1.16E+08 | 1.16E+08 | T | C | exonic | synonymous SNV    | C10orf81 | NM_001193435:c.T759C;p.A253A   | rs3750901   |      | P60 |
| chr11 | 1.06E+08 | 1.06E+08 | G | A | exonic | synonymous SNV    | GUCY1A2  | NM_000855:c.C432T;p.N144N      | rs35760785  |      | P60 |
| chr11 | 1.24E+08 | 1.24E+08 | A | T | exonic | nonsynonymous SNV | OR8B8    | NM_012378:c.T230A;p.I77N       | rs117106656 | 0    | P60 |
| chr12 | 25289551 | 25289551 | C | T | exonic | nonsynonymous SNV | KRAS     | NM_004985:c.G35A;p.G12D        |             | 0    | P60 |
| chr12 | 46654243 | 46654243 | C | T | exonic | nonsynonymous SNV | COL2A1   | NM_033150:c.G4006A;p.G1336S    | rs2070739   | 0.01 | P60 |
| chr12 | 46787428 | 46787428 | A | T | exonic | nonsynonymous SNV | PFKM     | NM_001166686:c.A5T;p.H2L       | rs11609399  | 0    | P60 |
| chr12 | 1.28E+08 | 1.28E+08 | C | T | exonic | synonymous SNV    | TMEM132D | NM_133448:c.G1821A;p.T607T     | rs79031518  |      | P60 |
| chr13 | 23927295 | 23927295 | C | T | exonic | nonsynonymous SNV | PARP4    | NM_006437:c.G2618A;p.S873N     | rs7140044   | 0.53 | P60 |
| chr13 | 23950261 | 23950261 | C | T | exonic | synonymous SNV    | PARP4    | NM_006437:c.G1602A;p.S534S     | rs4770696   |      | P60 |
| chr14 | 22944381 | 22944381 | C | T | exonic | synonymous SNV    | MYH6     | NM_002471:c.G393A;p.L131L      | rs17277970  |      | P60 |
| chr14 | 49652833 | 49652833 | G | T | exonic | nonsynonymous SNV | METTL21D | NM_001040662:c.C188A;p.A63D    | rs11157729  | 0.03 | P60 |
| chr14 | 49654998 | 49654998 | C | T | exonic | synonymous SNV    | SOS2     | NM_006939:c.G3813A;p.P1271P    | rs2227276   |      | P60 |
| chr14 | 90483547 | 90483547 | G | A | exonic | synonymous SNV    | RPS6KA5  | NM_004755:c.C495T;p.L165L      | rs56369401  |      | P60 |
| chr15 | 26096204 | 26096204 | C | T | exonic | synonymous SNV    | HERC2    | NM_004667:c.G9210A;p.S3070S    | rs61756153  |      | P60 |
| chr15 | 67126841 | 67126841 | G | A | exonic | nonsynonymous SNV | NOX5     | NM_001184779:c.G1643A;p.R548T  | rs2277552   |      | P60 |
| chr16 | 4105355  | 4105355  | G | C | exonic | synonymous SNV    | ADCY9    | NM_001116:c.C90G;p.V30V        |             |      | P60 |
| chr16 | 54077108 | 54077108 | C | T | exonic | synonymous SNV    | MMP2     | NM_001127891:c.C600T;p.T200T   | rs1053605   |      | P60 |
| chr16 | 54084614 | 54084614 | G | A | exonic | synonymous SNV    | MMP2     | NM_001127891:c.G1230A;p.T410T  | rs2287074   |      | P60 |
| chr17 | 7517852  | 7517852  | C | T | exonic | nonsynonymous SNV | TP53     | NM_001126115:c.G415A;p.E139K   |             | 0    | P60 |
| chr17 | 10360615 | 10360615 | G | A | exonic | stopgain SNV      | MYH1     | NM_005963:c.C70T;p.R24X        |             | 0.22 | P60 |
| chr17 | 71262771 | 71262771 | G | A | exonic | synonymous SNV    | ITGB4    | NM_001005619:c.G4389A;p.P1463P |             |      | P60 |
| chr17 | 75956371 | 75956371 | G | A | exonic | synonymous SNV    | RNF213   | NM_020914:c.G12135A;p.P4045P   | rs77506504  |      | P60 |

|       |          |          |   |   |                 |                   |         |                                 |             |           |
|-------|----------|----------|---|---|-----------------|-------------------|---------|---------------------------------|-------------|-----------|
| chr18 | 6975631  | 6975631  | C | T | exonic          | synonymous SNV    | LAMA1   | NM_005559:c.G5391A:p.L1797L     | rs617206    | P60       |
| chr18 | 8059868  | 8059868  | C | T | exonic          | synonymous SNV    | PTPRM   | NM_001105244:c.C1317T:p.N439M   | rs2230601   | P60       |
| chr18 | 8369296  | 8369296  | C | T | exonic          | synonymous SNV    | PTPRM   | NM_002845:c.C3705T:p.I1235I     | rs57391962  | P60       |
| chr19 | 7881586  | 7881586  | C | T | exonic          | synonymous SNV    | MAP2K7  | NM_145185:c.C573T:p.D191D       | rs2303701   | P60       |
| chr19 | 16375682 | 16375682 | G | A | exonic          | synonymous SNV    | EPS15L1 | NM_021235:c.C1488T:p.D496D      | rs76985523  | P60       |
| chr19 | 43640609 | 43640609 | C | T | exonic          | synonymous SNV    | RYR1    | NM_000540:c.C2004T:p.D668D      | rs78835441  | P60       |
| chr19 | 47935058 | 47935058 | A | G | exonic          | synonymous SNV    | PSG3    | NM_021016:c.T88C:p.L30L         | rs12185497  | P60       |
| chr19 | 61111075 | 61111075 | T | C | exonic          | nonsynonymous SNV | NLRP13  | NM_176810:c.A2342G:p.N781S      | rs17711239  | 0.09 P60  |
| chr20 | 23369101 | 23369101 | G | A | exonic          | nonsynonymous SNV | CSTL1   | NM_138283:c.G197A:p.R66K        | rs17757442  | 0.58 P60  |
| chr20 | 23372638 | 23372638 | C | T | exonic          | nonsynonymous SNV | CSTL1   | NM_138283:c.C287T:p.T96M        | rs3746737   | 0.01 P60  |
| chr20 | 32809496 | 32809496 | G | C | exonic          | nonsynonymous SNV | NCOA6   | NM_014071:c.C716G:p.P239R       | rs117787172 | 0.04 P60  |
| chr22 | 39883205 | 39883205 | G | A | exonic          | synonymous SNV    | EP300   | NM_001429:c.G3348A:p.Q1116Q     | rs20554     | P60       |
| chr1  | 2.14E+08 | 2.14E+08 | T | C | exonic          | nonsynonymous SNV | USH2A   | NM_007123:c.A4619G:p.D1540G     |             | 0.45 P2   |
| chr2  | 1.7E+08  | 1.7E+08  | C | T | exonic          | synonymous SNV    | LRP2    | NM_004525:c.G8847A:p.S2949S     |             | P2        |
| chr2  | 1.9E+08  | 1.9E+08  | C | T | exonic          | nonsynonymous SNV | COL3A1  | NM_000090:c.C578T:p.S193F       |             | 0 P2      |
| chr5  | 1.12E+08 | 1.12E+08 | C | T | exonic          | stopgain SNV      | APC     | NM_001127511:c.C1606T:p.R536X   |             | 0.02 P2   |
| chr12 | 25269829 | 25269829 | C | T | exonic          | nonsynonymous SNV | KRAS    | NM_004985:c.G436A:p.A146T       |             | 0.01 P2   |
| chr16 | 60409033 | 60409033 | C | T | exonic          | synonymous SNV    | CDH8    | NM_001796:c.G1128A:p.A376A      |             | P2        |
| chr18 | 46858786 | 46858786 | A | G | exonic          | nonsynonymous SNV | SMAD4   | NM_005359:c.A1610G:p.D537G      |             | 0 P2      |
| chrX  | 19308271 | 19308271 | C | T | exonic          | nonsynonymous SNV | MAP3K15 | NM_001001671:c.G2477A:p.R826H   |             | 0 P2      |
| chr4  | 1.57E+08 | 1.57E+08 | G | A | exonic          | synonymous SNV    | GUCY1A3 | NM_001130684:c.G687A:p.T229T    |             | P10       |
| chr5  | 1.12E+08 | 1.12E+08 | A | T | exonic          | stopgain SNV      | APC     | NM_001127511:c.A2923T:p.K975X   |             | 0 P10     |
| chr5  | 1.12E+08 | 1.12E+08 | C | T | exonic          | stopgain SNV      | APC     | NM_001127511:c.C4231T:p.Q1411X  |             | 0 P10     |
| chr7  | 1.03E+08 | 1.03E+08 | T | G | exonic          | nonsynonymous SNV | RELN    | NM_005045:c.A8093C:p.D2698A     |             | 0.24 P10  |
| chr12 | 25289551 | 25289551 | C | T | exonic          | nonsynonymous SNV | KRAS    | NM_004985:c.G35A:p.G12D         |             | 0 P10     |
| chr17 | 7518263  | 7518263  | C | T | exonic          | nonsynonymous SNV | TP53    | NM_001126115:c.G347A:p.R116Q    | rs11540652  | 0.02 P10  |
| chr18 | 61680920 | 61680920 | C | T | exonic          | nonsynonymous SNV | CDH7    | NM_004361:c.C1651T:p.R551W      |             | 0.01 P10  |
| chrX  | 32572317 | 32572317 | C | T | exonic          | nonsynonymous SNV | DMD     | NM_004007:c.G815A:p.R272Q       |             | 0.22 P10  |
| chr5  | 1.12E+08 | 1.12E+08 | G | A | exonic;splicing | synonymous SNV    | APC     | NM_001127511:c.G1494A:p.K498K   |             | P19       |
| chr17 | 7519280  | 7519280  | C | T | splicing        |                   | TP53    |                                 |             | P19       |
| chr4  | 1.27E+08 | 1.27E+08 | G | A | exonic          | synonymous SNV    | FAT4    | NM_024582:c.G13830A:p.L4610L    |             | P28       |
| chr10 | 1.06E+08 | 1.06E+08 | G | A | exonic          | nonsynonymous SNV | COL17A1 | NM_000494:c.C1642T:p.L548F      |             | 0 P28     |
| chr12 | 22245981 | 22245981 | G | A | exonic          | synonymous SNV    | ST8SIA1 | NM_003034:c.C843T:p.S281S       |             | P28       |
| chr12 | 25289551 | 25289551 | C | G | exonic          | nonsynonymous SNV | KRAS    | NM_004985:c.G35C:p.G12A         |             | 0.03 P28  |
| chr19 | 43743846 | 43743846 | G | A | exonic          | nonsynonymous SNV | RYR1    | NM_001042723:c.G12521A:p.R4174H |             | P28       |
| chr20 | 44115150 | 44115150 | C | T | exonic          | nonsynonymous SNV | SLC12A5 | NM_001134771:c.C2594T:p.P865L   |             | 0.05 P28  |
| chr11 | 1.08E+08 | 1.08E+08 | C | T | exonic          | nonsynonymous SNV | ATM     | NM_000051:c.C1009T:p.R337C      |             | 0 P69     |
| chr3  | 1.44E+08 | 1.44E+08 | T | A | splicing        |                   | ATR     |                                 |             | P143      |
| chr6  | 1.53E+08 | 1.53E+08 | C | T | exonic          | nonsynonymous SNV | SYNE1   | NM_015293:c.G3736A:p.E1246K     |             | 0 P143    |
| chr16 | 60612758 | 60612758 | T | C | exonic          | nonsynonymous SNV | CDH8    | NM_001796:c.A51G:p.I17M         |             | 0.08 P143 |
| chr17 | 7517845  | 7517845  | C | T | exonic          | nonsynonymous SNV | TP53    | NM_001126115:c.G422A:p.R141H    | rs28934576  | 0.01 P143 |
| chr19 | 48465359 | 48465359 | C | A | splicing        |                   | PSG9    |                                 |             | P143      |
| chrX  | 31860216 | 31860216 | C | A | exonic          | stopgain SNV      | DMD     | NM_004011:c.G2641T:p.E881X      |             | P143      |
| chrX  | 1.14E+08 | 1.14E+08 | G | T | exonic          | nonsynonymous SNV | HTR2C   | NM_000868:c.G1201T:p.V401F      |             | 0.07 P143 |
| chr1  | 11090925 | 11090925 | C | G | exonic          | nonsynonymous SNV | MTOR    | NM_004958:c.G7534C:p.D2512H     |             | 0 P144    |
| chr1  | 2.14E+08 | 2.14E+08 | T | A | exonic          | nonsynonymous SNV | USH2A   | NM_206933:c.A5277T:p.K1759N     |             | 0.42 P144 |
| chr4  | 1.26E+08 | 1.26E+08 | A | G | exonic          | nonsynonymous SNV | FAT4    | NM_024582:c.A3750G:p.I1250M     |             | P144      |
| chr5  | 1.12E+08 | 1.12E+08 | T | A | exonic          | stopgain SNV      | APC     | NM_001127511:c.T4074A:p.Y1358X  |             | 0.02 P144 |
| chr5  | 1.38E+08 | 1.38E+08 | T | C | exonic          | nonsynonymous SNV | CTNNA1  | NM_001903:c.T2536C:p.S846P      |             | 0.32 P144 |
| chr5  | 1.41E+08 | 1.41E+08 | G | A | exonic          | synonymous SNV    | HDAC3   | NM_003883:c.C36T:p.D12D         |             | P144      |
| chrX  | 1.14E+08 | 1.14E+08 | G | A | exonic          | nonsynonymous SNV | HTR2C   | NM_000868:c.G856A:p.A286T       |             | 0.6 P144  |
| chr1  | 1.84E+08 | 1.84E+08 | G | A | exonic          | nonsynonymous SNV | HMCN1   | NM_031935:c.G9595A:p.E3199K     |             | 0.32 P154 |
| chr2  | 1.7E+08  | 1.7E+08  | G | A | exonic          | nonsynonymous SNV | LRP2    | NM_004525:c.C9127T:p.R3043C     |             | 0 P154    |

|       |          |          |   |   |                 |                   |         |                                |             |           |
|-------|----------|----------|---|---|-----------------|-------------------|---------|--------------------------------|-------------|-----------|
| chr2  | 2.38E+08 | 2.38E+08 | C | T | exonic          | synonymous SNV    | COL6A3  | NM_057166:c.G6423A:p.P2141P    | rs113754336 | P154      |
| chr5  | 1.12E+08 | 1.12E+08 | C | T | exonic          | stopgain SNV      | APC     | NM_001127511:c.C3286T:p.R1096X |             | 0 P154    |
| chr5  | 1.12E+08 | 1.12E+08 | C | T | exonic          | stopgain SNV      | APC     | NM_001127511:c.C4294T:p.R1432X |             | 0.04 P154 |
| chr6  | 1.53E+08 | 1.53E+08 | C | A | exonic          | nonsynonymous SNV | SYNE1   | NM_033071:c.G7767T:p.Q2589H    |             | 0.28 P154 |
| chr12 | 25289551 | 25289551 | C | T | exonic          | nonsynonymous SNV | KRAS    | NM_004985:c.G35A:p.G12D        |             | 0 P154    |
| chr1  | 27814630 | 27814630 | G | A | exonic          | nonsynonymous SNV | FGR     | NM_001042729:c.C920T:p.A307V   |             | 0 P158    |
| chr1  | 1.57E+08 | 1.57E+08 | G | A | exonic          | synonymous SNV    | SPTA1   | NM_003126:c.C4500T:p.A1500A    |             | P158      |
| chr1  | 1.57E+08 | 1.57E+08 | C | T | exonic          | nonsynonymous SNV | SPTA1   | NM_003126:c.G3527A:p.R1176Q    |             | 0.59 P158 |
| chr1  | 1.84E+08 | 1.84E+08 | C | T | exonic          | nonsynonymous SNV | HMCN1   | NM_031935:c.C5065T:p.R1689C    |             | 0.03 P158 |
| chr1  | 1.84E+08 | 1.84E+08 | C | T | exonic          | nonsynonymous SNV | HMCN1   | NM_031935:c.C8029T:p.P2677S    |             | 0.12 P158 |
| chr1  | 2.14E+08 | 2.14E+08 | G | A | exonic          | synonymous SNV    | USH2A   | NM_206933:c.C14190T:p.T4730T   |             | P158      |
| chr1  | 2.14E+08 | 2.14E+08 | T | C | exonic          | nonsynonymous SNV | USH2A   | NM_007123:c.A2354G:p.Y785C     |             | 0.01 P158 |
| chr1  | 2.17E+08 | 2.17E+08 | A | G | exonic;splicing | nonsynonymous SNV | TGFB2   | NM_003238:c.A644G:p.D215G      |             | 0.21 P158 |
| chr3  | 1.53E+08 | 1.53E+08 | C | A | splicing        |                   | IGSF10  |                                |             | P158      |
| chr3  | 1.85E+08 | 1.85E+08 | G | A | exonic          | nonsynonymous SNV | DVL3    | NM_004423:c.G1904A:p.R635H     |             | 0.58 P158 |
| chr4  | 24994017 | 24994017 | T | C | exonic          | nonsynonymous SNV | ANAPC4  | NM_013367:c.T272C:p.V91A       |             | 0.04 P158 |
| chr4  | 1.26E+08 | 1.26E+08 | C | T | exonic          | nonsynonymous SNV | FAT4    | NM_024582:c.C341T:p.A114V      |             | P158      |
| chr5  | 1117359  | 1117359  | G | A | exonic          | nonsynonymous SNV | SLC12A7 | NM_006598:c.C2446T:p.R816C     |             | P158      |
| chr5  | 1138415  | 1138415  | G | A | exonic          | synonymous SNV    | SLC12A7 | NM_006598:c.C849T:p.C283C      |             | P158      |
| chr5  | 24571076 | 24571076 | G | A | exonic          | nonsynonymous SNV | CDH10   | NM_006727:c.C716T:p.A239V      |             | 0 P158    |
| chr6  | 90717085 | 90717085 | G | A | exonic          | synonymous SNV    | BACH2   | NM_001170794:c.C1461T:p.A487A  |             | P158      |
| chr6  | 1.3E+08  | 1.3E+08  | C | T | exonic;splicing | nonsynonymous SNV | LAMA2   | NM_001079823:c.C8344T:p.R2782C |             | 0.06 P158 |
| chr6  | 1.46E+08 | 1.46E+08 | G | A | exonic          | synonymous SNV    | GRM1    | NM_000838:c.G99A:p.S33S        |             | P158      |
| chr6  | 1.47E+08 | 1.47E+08 | A | G | exonic          | nonsynonymous SNV | GRM1    | NM_000838:c.A1378G:p.I460V     |             | 0.25 P158 |
| chr6  | 1.47E+08 | 1.47E+08 | C | T | exonic          | nonsynonymous SNV | GRM1    | NM_000838:c.C2363T:p.A788V     |             | 0.01 P158 |
| chr6  | 1.47E+08 | 1.47E+08 | G | A | exonic          | nonsynonymous SNV | GRM1    | NM_000838:c.G3554A:p.R1185Q    |             | 0.16 P158 |
| chr6  | 1.53E+08 | 1.53E+08 | C | A | exonic          | nonsynonymous SNV | SYNE1   | NM_033071:c.G14874T:p.E4958D   |             | 0.26 P158 |
| chr6  | 1.53E+08 | 1.53E+08 | T | G | exonic          | synonymous SNV    | SYNE1   | NM_033071:c.A1015C:p.R339R     |             | P158      |
| chr6  | 1.66E+08 | 1.66E+08 | C | A | exonic          | nonsynonymous SNV | PDE10A  | NM_001130690:c.G2285T:p.W762L  |             | 0 P158    |
| chr7  | 91544257 | 91544257 | G | T | exonic;splicing | nonsynonymous SNV | AKAP9   | NM_005751:c.G6765T:p.K2255N    |             | 0.01 P158 |
| chr7  | 1.52E+08 | 1.52E+08 | G | A | exonic          | nonsynonymous SNV | MLL3    | NM_170606:c.C707T:p.A236V      |             | 1 P158    |
| chr9  | 1.37E+08 | 1.37E+08 | G | A | exonic;splicing | synonymous SNV    | COL5A1  | NM_000093:c.G2286A:p.P762P     |             | P158      |
| chr9  | 1.37E+08 | 1.37E+08 | C | A | exonic          | nonsynonymous SNV | COL5A1  | NM_000093:c.C2608A:p.P870T     |             | 0.05 P158 |
| chr10 | 55252086 | 55252086 | C | T | exonic          | synonymous SNV    | PCDH15  | NM_001142767:c.G5286A:p.T1762T |             | P158      |
| chr11 | 66959137 | 66959137 | C | T | exonic          | nonsynonymous SNV | RPS6KB2 | NM_003952:c.C1370T:p.S457L     | rs1052688   | P158      |
| chr13 | 66698012 | 66698012 | G | T | exonic          | synonymous SNV    | PCDH9   | NM_020403:c.C2562A:p.A854A     |             | P158      |
| chr16 | 63542192 | 63542192 | C | T | exonic          | nonsynonymous SNV | CDH11   | NM_001797:c.G1873A:p.A625T     |             | 0.27 P158 |
| chr17 | 3613969  | 3613969  | G | A | exonic          | nonsynonymous SNV | ITGAE   | NM_002208:c.C190T:p.P64S       |             | 0.54 P158 |
| chr17 | 10287536 | 10287536 | G | A | exonic          | nonsynonymous SNV | MYH4    | NM_017533:c.C5701T:p.R1901C    |             | 0 P158    |
| chr17 | 26678656 | 26678656 | C | T | exonic          | nonsynonymous SNV | NF1     | NM_000267:c.C5219T:p.A1740V    |             | 0.22 P158 |
| chr19 | 4052123  | 4052123  | A | G | exonic          | nonsynonymous SNV | MAP2K2  | NM_030662:c.T599C:p.I200T      |             | 0 P158    |
| chr20 | 32801227 | 32801227 | T | C | exonic          | nonsynonymous SNV | NCOA6   | NM_014071:c.A2432G:p.D811G     |             | 0 P158    |
| chr22 | 39877943 | 39877943 | A | G | exonic          | nonsynonymous SNV | EP300   | NM_001429:c.A2978G:p.Q993R     |             | 0.39 P158 |
| chrX  | 32215705 | 32215705 | C | T | exonic          | nonsynonymous SNV | DMD     | NM_004011:c.G2129A:p.R710Q     |             | 0.64 P158 |
| chrX  | 32382763 | 32382763 | A | T | exonic          | stopgain SNV      | DMD     | NM_004007:c.T3171A:p.Y1057X    |             | P158      |
| chr5  | 1.12E+08 | 1.12E+08 | G | T | exonic          | stopgain SNV      | APC     | NM_001127511:c.G4066T:p.E1356X |             | 0.03 P159 |
| chr5  | 1.4E+08  | 1.4E+08  | C | T | exonic          | nonsynonymous SNV | PCDHA10 | NM_018901:c.C1532T:p.A511V     |             | 0.02 P159 |
| chr13 | 23973970 | 23973970 | G | C | exonic          | nonsynonymous SNV | PARP4   | NM_006437:c.C135G:p.C45W       |             | 0.01 P159 |
| chr17 | 3595807  | 3595807  | C | A | exonic;splicing | nonsynonymous SNV | ITGAE   | NM_002208:c.G2319T:p.E773D     |             | 0.05 P159 |
| chr2  | 2.38E+08 | 2.38E+08 | A | G | exonic          | nonsynonymous SNV | COL6A3  | NM_057165:c.T629C:p.L210P      |             | P155      |
| chr4  | 1.26E+08 | 1.26E+08 | C | T | exonic          | nonsynonymous SNV | FAT4    | NM_024582:c.C3505T:p.R1169W    |             | P155      |
| chr5  | 1.12E+08 | 1.12E+08 | G | T | exonic          | stopgain SNV      | APC     | NM_001127511:c.G3121T:p.E1041X |             | 0 P155    |
| chr11 | 1.34E+08 | 1.34E+08 | C | T | exonic          | synonymous SNV    | GLB1L2  | NM_138342:c.C1056T:p.G352G     |             | P155      |

|       |          |          |   |   |                 |                   |         |                                |             |      |      |
|-------|----------|----------|---|---|-----------------|-------------------|---------|--------------------------------|-------------|------|------|
| chr17 | 7519204  | 7519204  | G | A | exonic          | nonsynonymous SN\ | TP53    | NM_001126115:c.C55T;p.P19S     | rs28934874  | 0.01 | P155 |
| chr2  | 1.16E+08 | 1.16E+08 | C | G | exonic          | synonymous SNV    | DPP10   | NM_001004360:c.C1083G;p.L361L  |             |      | P156 |
| chr3  | 1.53E+08 | 1.53E+08 | G | A | exonic          | nonsynonymous SN\ | IGSF10  | NM_001178145:c.C632T;p.S211F   |             | 0.02 | P156 |
| chr6  | 1.53E+08 | 1.53E+08 | C | T | exonic          | nonsynonymous SN\ | SYNE1   | NM_033071:c.G9283A;p.A3095T    |             | 0.06 | P156 |
| chr10 | 55496542 | 55496542 | G | C | exonic          | nonsynonymous SN\ | PCDH15  | NM_001142765:c.C1988G;p.A663G  |             | 0.2  | P156 |
| chr17 | 7518264  | 7518264  | G | A | exonic          | nonsynonymous SN\ | TP53    | NM_001126115:c.C346T;p.R116W   |             | 0    | P156 |
| chr17 | 10336495 | 10336495 | C | A | exonic          | nonsynonymous SN\ | MYH1    | NM_005963:c.G5783T;p.S1928I    |             | 0    | P156 |
| chrX  | 1.14E+08 | 1.14E+08 | G | A | exonic          | synonymous SNV    | HTR2C   | NM_000868:c.G447A;p.S149S      |             |      | P156 |
| chrX  | 1.52E+08 | 1.52E+08 | G | A | exonic          | nonsynonymous SN\ | ATP2B3  | NM_001001344:c.G1739A;p.R580H  |             | 0    | P156 |
| chr3  | 13891563 | 13891563 | G | A | exonic          | synonymous SNV    | WNT7A   | NM_004625:c.C180T;p.I60I       |             |      | P27  |
| chr5  | 1.4E+08  | 1.4E+08  | C | T | exonic          | nonsynonymous SN\ | PCDHB1  | NM_013340:c.C827T;p.A276V      |             | 0.05 | P27  |
| chr11 | 1.08E+08 | 1.08E+08 | G | A | splicing        |                   | ATM     |                                |             |      | P27  |
| chr12 | 25269914 | 25269914 | T | A | exonic          | nonsynonymous SN\ | KRAS    | NM_004985:c.A351T;p.K117N      |             | 0    | P27  |
| chr17 | 7519182  | 7519182  | C | T | exonic          | nonsynonymous SN\ | TP53    | NM_001126115:c.G77A;p.R26H     |             | 0    | P27  |
| chr20 | 2725881  | 2725881  | G | A | exonic          | synonymous SNV    | CPXM1   | NM_001184699:c.C789T;p.G263G   |             |      | P27  |
| chr2  | 1.9E+08  | 1.9E+08  | G | A | exonic          | nonsynonymous SN\ | COL3A1  | NM_000090:c.G713A;p.R238Q      |             | 0.11 | P26  |
| chr5  | 1.12E+08 | 1.12E+08 | C | T | exonic          | stopgain SNV      | APC     | NM_001127511:c.C793T;p.R265X   |             | 0    | P26  |
| chr5  | 1.12E+08 | 1.12E+08 | G | T | exonic          | stopgain SNV      | APC     | NM_001127511:c.G4066T;p.E1356X |             | 0.03 | P26  |
| chr17 | 7519138  | 7519138  | C | T | exonic          | nonsynonymous SN\ | TP53    | NM_001126115:c.G121A;p.V41M    |             | 0    | P26  |
| chr17 | 75933756 | 75933756 | G | A | exonic          | synonymous SNV    | RNF213  | NM_020914:c.G7173A;p.K2391K    |             |      | P26  |
| chr3  | 41243770 | 41243770 | A | C | exonic          | nonsynonymous SN\ | CTNNB1  | NM_001098209:c.A1004C;p.K335T  |             | 0    | P23  |
| chr5  | 1.4E+08  | 1.4E+08  | C | T | exonic          | nonsynonymous SN\ | PCDHA4  | NM_018907:c.C1301T;p.S434L     |             | 0.02 | P23  |
| chr12 | 5996028  | 5996028  | G | A | exonic          | synonymous SNV    | VWF     | NM_000552:c.C5226T;p.D1742D    |             |      | P23  |
| chr12 | 25289551 | 25289551 | C | T | exonic          | nonsynonymous SN\ | KRAS    | NM_004985:c.G35A;p.G12D        |             | 0    | P23  |
| chr19 | 48067966 | 48067966 | T | A | exonic          | nonsynonymous SN\ | PSG1    | NM_001184825:c.A502T;p.T168S   |             | 0.32 | P23  |
| chr4  | 54831583 | 54831583 | G | A | exonic          | nonsynonymous SN\ | PDGFRA  | NM_006206:c.G1148A;p.R383H     |             | 0    | P22  |
| chr5  | 1.12E+08 | 1.12E+08 | A | T | exonic          | stopgain SNV      | APC     | NM_001127511:c.A4102T;p.R1368X |             | 0    | P22  |
| chr6  | 1.53E+08 | 1.53E+08 | C | T | exonic;splicing | nonsynonymous SN\ | SYNE1   | NM_033071:c.G7733A;p.R2578K    |             | 0.06 | P22  |
| chr6  | 1.53E+08 | 1.53E+08 | G | A | exonic          | nonsynonymous SN\ | SYNE1   | NM_033071:c.C4442T;p.T1481I    |             | 0.07 | P22  |
| chr17 | 7518263  | 7518263  | C | T | exonic          | nonsynonymous SN\ | TP53    | NM_001126115:c.G347A;p.R116Q   | rs11540652  | 0.02 | P22  |
| chr1  | 1.57E+08 | 1.57E+08 | G | T | exonic          | nonsynonymous SN\ | SPTA1   | NM_003126:c.C1814A;p.A605E     |             | 0    | P21  |
| chr4  | 1.27E+08 | 1.27E+08 | G | T | exonic          | nonsynonymous SN\ | FAT4    | NM_024582:c.G14012T;p.S4671I   |             | 0.15 | P21  |
| chr5  | 1.12E+08 | 1.12E+08 | C | G | exonic          | nonsynonymous SN\ | APC     | NM_001127511:c.C2180G;p.P727R  |             | 0.01 | P21  |
| chr10 | 75344590 | 75344590 | A | G | exonic          | nonsynonymous SN\ | PLAU    | NM_001145031:c.A829G;p.T277A   |             | 0.29 | P21  |
| chr11 | 1.06E+08 | 1.06E+08 | G | T | exonic          | nonsynonymous SN\ | GUCY1A2 | NM_000855:c.C1645A;p.L549M     |             | 0    | P21  |
| chr12 | 25289552 | 25289552 | C | T | exonic          | nonsynonymous SN\ | KRAS    | NM_004985:c.G34A;p.G12S        |             | 0    | P21  |
| chr13 | 66699958 | 66699958 | C | A | exonic          | nonsynonymous SN\ | PCDH9   | NM_020403:c.G616T;p.V206F      |             | 0    | P21  |
| chr17 | 7518263  | 7518263  | C | A | exonic          | nonsynonymous SN\ | TP53    | NM_001126115:c.G347T;p.R116L   |             | 0    | P21  |
| chr1  | 1.58E+08 | 1.58E+08 | G | A | exonic          | nonsynonymous SN\ | ATP1A2  | NM_000702:c.G3005A;p.R1002Q    |             | 0    | P20  |
| chr1  | 2.15E+08 | 2.15E+08 | A | G | exonic          | nonsynonymous SN\ | USH2A   | NM_007123:c.T1439C;p.V480A     |             | 0.39 | P20  |
| chr2  | 2.12E+08 | 2.12E+08 | G | A | exonic          | stopgain SNV      | ERBB4   | NM_001042599:c.C1555T;p.Q519X  |             | 0.05 | P20  |
| chr5  | 1.12E+08 | 1.12E+08 | C | A | exonic          | stopgain SNV      | APC     | NM_001127511:c.C2535A;p.Y845X  |             | 0    | P20  |
| chr10 | 55251889 | 55251889 | G | A | exonic          | nonsynonymous SN\ | PCDH15  | NM_001142767:c.C5483T;p.T1828M |             | 0    | P20  |
| chr12 | 25289551 | 25289551 | C | T | exonic          | nonsynonymous SN\ | KRAS    | NM_004985:c.G35A;p.G12D        |             | 0    | P20  |
| chr15 | 65244323 | 65244323 | G | C | exonic          | nonsynonymous SN\ | SMAD3   | NM_001145103:c.G111C;p.K37N    |             | 0    | P20  |
| chr17 | 7518988  | 7518988  | G | A | exonic          | stopgain SNV      | TP53    | NM_001126115:c.C190T;p.R64X    |             | 0    | P20  |
| chrX  | 1.54E+08 | 1.54E+08 | G | A | exonic          | nonsynonymous SN\ | F8      | NM_000132:c.C2951T;p.S984L     |             | 1    | P20  |
| chr3  | 41241128 | 41241128 | A | G | exonic          | nonsynonymous SN\ | CTNNB1  | NM_001098209:c.A121G;p.T41A    |             | 0.01 | P25  |
| chr7  | 81169936 | 81169936 | C | T | exonic          | nonsynonymous SN\ | HGF     | NM_000601:c.G2084A;p.R695H     |             | 0    | P25  |
| chr9  | 21295096 | 21295096 | T | A | exonic          | stopgain SNV      | IFNA5   | NM_002169:c.A160T;p.K54X       |             |      | P25  |
| chr9  | 1.37E+08 | 1.37E+08 | C | T | exonic          | synonymous SNV    | COL5A1  | NM_000093:c.C2676T;p.G892G     |             |      | P25  |
| chr12 | 25289548 | 25289548 | C | T | exonic          | nonsynonymous SN\ | KRAS    | NM_004985:c.G38A;p.G13D        | rs112445441 | 0    | P25  |
| chr17 | 7514707  | 7514707  | C | A | exonic          | stopgain SNV      | TP53    | NM_001126115:c.G649T;p.E217X   |             | 0    | P25  |

|       |          |          |   |   |                 |                   |          |                                 |             |           |
|-------|----------|----------|---|---|-----------------|-------------------|----------|---------------------------------|-------------|-----------|
| chr17 | 51585878 | 51585878 | G | A | exonic          | synonymous SNV    | ANKFN1   | NM_153228:c.G9A:p.A3A           |             | P25       |
| chr10 | 1.34E+08 | 1.34E+08 | G | C | exonic          | synonymous SNV    | LRRC27   | NM_001143758:c.G1113C:p.L371L   |             | P24       |
| chr5  | 1.12E+08 | 1.12E+08 | C | T | exonic;splicing | stopgain SNV      | APC      | NM_000038:c.C646T:p.R216X       | rs62619935  | 0.19 P95  |
| chr5  | 1.12E+08 | 1.12E+08 | C | T | exonic          | stopgain SNV      | APC      | NM_000038:c.C694T:p.R232X       |             | 0.29 P95  |
| chr7  | 37278008 | 37278008 | C | T | exonic          | nonsynonymous SNV | ELMO1    | NM_014800:c.G197A:p.R66H        |             | 0 P95     |
| chr10 | 28189602 | 28189602 | G | A | exonic          | synonymous SNV    | ARMC4    | NM_018076:c.C2979T:p.D993D      | rs74555138  | P95       |
| chr10 | 1.27E+08 | 1.27E+08 | G | A | exonic          | nonsynonymous SNV | CTBP2    | NM_022802:c.C1814T:p.T605M      | rs3198932   | 0 P95     |
| chr11 | 1.08E+08 | 1.08E+08 | C | T | exonic          | stopgain SNV      | ATM      | NM_000051:c.C8977T:p.R2993X     |             | 0.02 P95  |
| chr15 | 26109928 | 26109928 | C | T | exonic          | nonsynonymous SNV | HERC2    | NM_004667:c.G8509A:p.V2837I     |             | 0.16 P95  |
| chr20 | 44115667 | 44115667 | T | C | exonic          | nonsynonymous SNV | SLC12A5  | NM_001134771:c.T2660C:p.M887T   |             | 0.02 P95  |
| chr22 | 21767884 | 21767884 | T | G | exonic          | nonsynonymous SNV | GNAZ     | NM_002073:c.T2G:p.M1R           |             | 0 P95     |
| chr5  | 1.12E+08 | 1.12E+08 | C | T | exonic          | stopgain SNV      | APC      | NM_001127511:c.C667T:p.R223X    |             | 0 P86     |
| chr12 | 25289551 | 25289551 | C | A | exonic          | nonsynonymous SNV | KRAS     | NM_004985:c.G35T:p.G12V         |             | 0 P86     |
| chr19 | 43668135 | 43668135 | G | A | exonic          | nonsynonymous SNV | RYR1     | NM_000540:c.G5000A:p.R1667H     |             | 0.05 P86  |
| chr19 | 43743771 | 43743771 | C | T | exonic          | nonsynonymous SNV | RYR1     | NM_001042723:c.C12446T:p.P4149L |             | P86       |
| chr5  | 1.12E+08 | 1.12E+08 | C | T | exonic          | stopgain SNV      | APC      | NM_001127511:c.C667T:p.R223X    |             | 0 P58     |
| chr12 | 25271543 | 25271543 | T | A | exonic          | nonsynonymous SNV | KRAS     | NM_004985:c.A182T:p.Q61L        |             | 0 P58     |
| chr12 | 1.08E+08 | 1.08E+08 | C | T | exonic          | synonymous SNV    | ACACB    | NM_001093:c.C2259T:p.T753T      |             | P58       |
| chr12 | 25289551 | 25289551 | C | T | exonic          | nonsynonymous SNV | KRAS     | NM_004985:c.G35A:p.G12D         |             | 0 P94     |
| chr17 | 7518993  | 7518993  | A | G | exonic          | nonsynonymous SNV | TP53     | NM_001126115:c.T185C:p.L62P     |             | 0 P94     |
| chr17 | 7518988  | 7518988  | G | A | exonic          | stopgain SNV      | TP53     | NM_001126115:c.C190T:p.R64X     |             | 0 P145    |
| chr2  | 2.38E+08 | 2.38E+08 | G | A | exonic          | synonymous SNV    | COL6A3   | NM_057166:c.C4818T:p.G1606G     |             | P105      |
| chr6  | 1.53E+08 | 1.53E+08 | G | A | exonic          | nonsynonymous SNV | SYNE1    | NM_033071:c.C529T:p.R177W       |             | 0 P105    |
| chr11 | 1.08E+08 | 1.08E+08 | G | T | exonic          | stopgain SNV      | ATM      | NM_000051:c.G7708T:p.E2570X     |             | 0.29 P105 |
| chr17 | 7520038  | 7520038  | G | A | exonic;splicing | nonsynonymous SNV | TP53     | NM_000546:c.C374T:p.T125M       |             | 0 P105    |
| chr19 | 43648743 | 43648743 | C | T | exonic          | nonsynonymous SNV | RYR1     | NM_000540:c.C3043T:p.R1015C     |             | 0 P105    |
| chr1  | 1.51E+08 | 1.51E+08 | G | A | exonic          | nonsynonymous SNV | FLG      | NM_002016:c.C3661T:p.R1221C     |             | 0.01 P106 |
| chr5  | 1.12E+08 | 1.12E+08 | G | T | exonic          | stopgain SNV      | APC      | NM_001127511:c.G3862T:p.E1288X  |             | 0.1 P106  |
| chr12 | 25269829 | 25269829 | C | T | exonic          | nonsynonymous SNV | KRAS     | NM_004985:c.G436A:p.A146T       |             | 0.01 P106 |
| chr12 | 25289548 | 25289548 | C | T | exonic          | nonsynonymous SNV | KRAS     | NM_004985:c.G38A:p.G13D         | rs112445441 | 0 P106    |
| chr12 | 1.29E+08 | 1.29E+08 | C | T | exonic          | nonsynonymous SNV | TMEM132D | NM_133448:c.G481A:p.A161T       |             | 0.04 P106 |
| chr18 | 46858786 | 46858786 | A | G | exonic          | nonsynonymous SNV | SMAD4    | NM_005359:c.A1610G:p.D537G      |             | 0 P106    |
| chr1  | 2.14E+08 | 2.14E+08 | C | A | exonic          | stopgain SNV      | USH2A    | NM_007123:c.G1975T:p.G659X      |             | 0.02 P103 |
| chr1  | 2.14E+08 | 2.14E+08 | A | T | exonic          | synonymous SNV    | USH2A    | NM_007123:c.T1974A:p.I658I      |             | P103      |
| chr5  | 1.4E+08  | 1.4E+08  | C | T | exonic          | nonsynonymous SNV | PCDHA11  | NM_018902:c.C1852T:p.R618C      |             | P103      |
| chr5  | 1.41E+08 | 1.41E+08 | G | A | exonic          | nonsynonymous SNV | PCDHB7   | NM_018940:c.G1330A:p.V444I      |             | 0.82 P103 |
| chr6  | 1.53E+08 | 1.53E+08 | G | T | exonic          | synonymous SNV    | SYNE1    | NM_133650:c.C2001A:p.I667I      |             | P103      |
| chr7  | 1.51E+08 | 1.51E+08 | G | A | exonic          | nonsynonymous SNV | MLL3     | NM_170606:c.C10898T:p.P3633L    |             | 1 P103    |
| chr11 | 1.06E+08 | 1.06E+08 | G | A | exonic          | nonsynonymous SNV | GUCY1A2  | NM_000855:c.C1829T:p.P610L      |             | 0.05 P103 |
| chr12 | 25289551 | 25289551 | C | T | exonic          | nonsynonymous SNV | KRAS     | NM_004985:c.G35A:p.G12D         |             | 0 P103    |
| chr15 | 26110871 | 26110871 | C | T | exonic          | nonsynonymous SNV | HERC2    | NM_004667:c.G8282A:p.G2761D     |             | 0.23 P103 |
| chr2  | 1.16E+08 | 1.16E+08 | G | T | exonic          | nonsynonymous SNV | DPP10    | NM_001004360:c.G1566T:p.K522N   |             | 0.03 P104 |
| chr5  | 24573393 | 24573393 | G | C | exonic          | nonsynonymous SNV | CDH10    | NM_006727:c.C379G:p.L127V       |             | 0 P104    |
| chr5  | 1.12E+08 | 1.12E+08 | C | T | exonic          | stopgain SNV      | APC      | NM_001127511:c.C850T:p.R284X    |             | 0.01 P104 |
| chr5  | 1.12E+08 | 1.12E+08 | C | G | exonic          | stopgain SNV      | APC      | NM_001127511:c.C4013G:p.S1338X  |             | 0.72 P104 |
| chr12 | 25289552 | 25289552 | C | T | exonic          | nonsynonymous SNV | KRAS     | NM_004985:c.G34A:p.G12S         |             | 0 P104    |
| chr16 | 3956800  | 3956800  | T | A | exonic          | nonsynonymous SNV | ADCY9    | NM_001116:c.A3039T:p.E1013D     |             | 0.24 P104 |
| chr16 | 60409138 | 60409138 | C | T | splicing        |                   | CDH8     |                                 |             | P104      |
| chr17 | 7517849  | 7517849  | C | A | exonic          | nonsynonymous SNV | TP53     | NM_001126115:c.G418T:p.V140L    |             | 0.01 P104 |
| chr5  | 24545564 | 24545564 | A | G | exonic          | nonsynonymous SNV | CDH10    | NM_006727:c.T1124C:p.I375T      |             | 0.01 P101 |
| chr5  | 82886591 | 82886591 | G | A | exonic          | nonsynonymous SNV | VCAN     | NM_001126336:c.G1490A:p.R497H   |             | 0 P101    |
| chr5  | 1.12E+08 | 1.12E+08 | C | T | exonic;splicing | stopgain SNV      | APC      | NM_000038:c.C646T:p.R216X       | rs62619935  | 0.19 P101 |
| chr6  | 1.53E+08 | 1.53E+08 | C | T | exonic          | nonsynonymous SNV | SYNE1    | NM_015293:c.G4264A:p.V1422I     |             | 0.14 P101 |

|       |          |          |   |   |                 |                           |                                |             |      |      |
|-------|----------|----------|---|---|-----------------|---------------------------|--------------------------------|-------------|------|------|
| chr7  | 1.51E+08 | 1.51E+08 | T | C | exonic          | nonsynonymous SN\ MLL3    | NM_170606:c.A13495G;p.K4499E   | 0           | P101 |      |
| chr17 | 7517846  | 7517846  | G | A | exonic          | nonsynonymous SN\ TP53    | NM_001126115:c.C421T;p.R141C   | 0           | P101 |      |
| chr5  | 82872159 | 82872159 | C | T | exonic          | synonymous SNV VCAN       | NM_001164097:c.C4620T;p.F1540F |             | P102 |      |
| chr10 | 97182215 | 97182215 | C | T | exonic          | nonsynonymous SN\ SORBS1  | NM_001034957:c.G185A;p.R62Q    | 0.02        | P102 |      |
| chr17 | 7517845  | 7517845  | C | T | exonic          | nonsynonymous SN\ TP53    | NM_001126115:c.G422A;p.R141H   | rs28934576  | 0.01 | P102 |
| chr6  | 1.53E+08 | 1.53E+08 | A | G | exonic          | nonsynonymous SN\ SYNE1   | NM_033071:c.T14899C;p.F4967L   |             | 1    | P99  |
| chr7  | 93872468 | 93872468 | C | T | exonic          | stopgain SNV COL1A2       | NM_000089:c.C454T;p.R152X      |             | 0.03 | P99  |
| chr1  | 45041393 | 45041393 | G | A | exonic          | nonsynonymous SN\ PLK3    | NM_004073:c.G929A;p.R310H      |             | 0.1  | P100 |
| chr1  | 51646490 | 51646490 | C | A | exonic          | stopgain SNV EPS15        | NM_001159969:c.G436T;p.E146X   |             | 0.01 | P100 |
| chr1  | 70064038 | 70064038 | A | G | exonic          | synonymous SNV LRRC7      | NM_020794:c.A327G;p.E109E      |             |      | P100 |
| chr1  | 70224589 | 70224589 | C | A | exonic          | nonsynonymous SN\ LRRC7   | NM_020794:c.C749A;p.S250Y      |             | 0.01 | P100 |
| chr1  | 70266563 | 70266563 | C | A | exonic          | nonsynonymous SN\ LRRC7   | NM_020794:c.C1802A;p.P601Q     |             | 0    | P100 |
| chr1  | 70276613 | 70276613 | A | G | exonic          | nonsynonymous SN\ LRRC7   | NM_020794:c.A2404G;p.T802A     |             | 0    | P100 |
| chr1  | 70277473 | 70277473 | T | G | exonic          | nonsynonymous SN\ LRRC7   | NM_020794:c.T3264G;p.F1088L    |             | 0.36 | P100 |
| chr1  | 1.51E+08 | 1.51E+08 | G | A | exonic          | nonsynonymous SN\ FLG     | NM_002016:c.C8567T;p.S2856L    |             | 0    | P100 |
| chr1  | 1.51E+08 | 1.51E+08 | C | T | exonic          | nonsynonymous SN\ FLG     | NM_002016:c.G2968A;p.E990K     |             | 0.02 | P100 |
| chr1  | 1.57E+08 | 1.57E+08 | C | A | exonic;splicing | nonsynonymous SN\ SPTA1   | NM_003126:c.G6602T;p.R2201I    |             | 0.07 | P100 |
| chr1  | 1.57E+08 | 1.57E+08 | C | A | exonic          | nonsynonymous SN\ SPTA1   | NM_003126:c.G5650T;p.D1884Y    |             | 0.02 | P100 |
| chr1  | 1.57E+08 | 1.57E+08 | C | T | exonic          | nonsynonymous SN\ SPTA1   | NM_003126:c.G1267A;p.D423N     |             | 0.22 | P100 |
| chr1  | 1.57E+08 | 1.57E+08 | T | G | exonic          | nonsynonymous SN\ SPTA1   | NM_003126:c.A1092C;p.E364D     |             | 0.6  | P100 |
| chr1  | 1.57E+08 | 1.57E+08 | C | A | exonic          | nonsynonymous SN\ SPTA1   | NM_003126:c.G963T;p.K321N      |             | 0.52 | P100 |
| chr1  | 1.58E+08 | 1.58E+08 | G | A | exonic          | nonsynonymous SN\ ATP1A2  | NM_000702:c.G2288A;p.R763H     |             | 0    | P100 |
| chr1  | 1.58E+08 | 1.58E+08 | G | T | exonic          | nonsynonymous SN\ ATP1A4  | NM_144699:c.G830T;p.R277I      |             | 0    | P100 |
| chr1  | 1.58E+08 | 1.58E+08 | C | T | exonic          | nonsynonymous SN\ ATP1A4  | NM_144699:c.C1837T;p.R613C     |             | 0    | P100 |
| chr1  | 1.84E+08 | 1.84E+08 | G | T | exonic          | nonsynonymous SN\ HMCN1   | NM_031935:c.G1055T;p.G352V     |             | 0    | P100 |
| chr1  | 1.84E+08 | 1.84E+08 | C | A | exonic          | synonymous SNV HMCN1      | NM_031935:c.C1887A;p.V629V     |             |      | P100 |
| chr1  | 1.84E+08 | 1.84E+08 | G | T | exonic          | nonsynonymous SN\ HMCN1   | NM_031935:c.G2076T;p.Q692H     |             | 0.09 | P100 |
| chr1  | 1.84E+08 | 1.84E+08 | G | T | exonic          | stopgain SNV HMCN1        | NM_031935:c.G4042T;p.E1348X    |             | 0.69 | P100 |
| chr1  | 1.84E+08 | 1.84E+08 | G | A | exonic          | nonsynonymous SN\ HMCN1   | NM_031935:c.G4436A;p.G1479D    |             | 0.04 | P100 |
| chr1  | 1.84E+08 | 1.84E+08 | G | T | exonic          | stopgain SNV HMCN1        | NM_031935:c.G5071T;p.E1691X    |             | 0.49 | P100 |
| chr1  | 1.84E+08 | 1.84E+08 | T | C | exonic          | nonsynonymous SN\ HMCN1   | NM_031935:c.T5744C;p.V1915A    |             | 0    | P100 |
| chr1  | 1.84E+08 | 1.84E+08 | G | T | exonic          | stopgain SNV HMCN1        | NM_031935:c.G10495T;p.E3499X   |             | 0.33 | P100 |
| chr1  | 1.84E+08 | 1.84E+08 | A | G | exonic          | nonsynonymous SN\ HMCN1   | NM_031935:c.A11609G;p.D3870G   |             | 0.19 | P100 |
| chr1  | 1.84E+08 | 1.84E+08 | G | A | exonic          | nonsynonymous SN\ HMCN1   | NM_031935:c.G11933A;p.R3978Q   |             | 0.35 | P100 |
| chr1  | 1.84E+08 | 1.84E+08 | G | A | exonic          | nonsynonymous SN\ HMCN1   | NM_031935:c.G12371A;p.R4124H   |             | 0.12 | P100 |
| chr1  | 1.84E+08 | 1.84E+08 | C | A | exonic          | nonsynonymous SN\ HMCN1   | NM_031935:c.C13780A;p.L4594I   |             | 0.28 | P100 |
| chr1  | 1.84E+08 | 1.84E+08 | T | G | exonic          | nonsynonymous SN\ HMCN1   | NM_031935:c.T16039G;p.L5347V   |             |      | P100 |
| chr1  | 1.84E+08 | 1.84E+08 | C | A | exonic          | nonsynonymous SN\ HMCN1   | NM_031935:c.C16180A;p.L5394I   |             |      | P100 |
| chr1  | 1.84E+08 | 1.84E+08 | C | T | exonic          | synonymous SNV HMCN1      | NM_031935:c.C16467T;p.C5489C   |             |      | P100 |
| chr1  | 2.08E+08 | 2.08E+08 | G | T | exonic          | nonsynonymous SN\ HSD11B1 | NM_005525:c.G655T;p.D219Y      |             | 0    | P100 |
| chr1  | 2.14E+08 | 2.14E+08 | C | T | exonic          | nonsynonymous SN\ USH2A   | NM_206933:c.G15374A;p.R5125H   |             | 0.2  | P100 |
| chr1  | 2.14E+08 | 2.14E+08 | G | A | exonic          | stopgain SNV USH2A        | NM_206933:c.C13576T;p.R4526X   |             | 0.56 | P100 |
| chr1  | 2.14E+08 | 2.14E+08 | G | T | exonic          | nonsynonymous SN\ USH2A   | NM_206933:c.C13257A;p.F4419L   |             | 0.22 | P100 |
| chr1  | 2.14E+08 | 2.14E+08 | C | A | exonic          | stopgain SNV USH2A        | NM_206933:c.G12865T;p.E4289X   |             | 0.8  | P100 |
| chr1  | 2.14E+08 | 2.14E+08 | G | A | exonic          | nonsynonymous SN\ USH2A   | NM_206933:c.C12343T;p.R4115C   | rs111033275 | 0.01 | P100 |
| chr1  | 2.14E+08 | 2.14E+08 | A | G | exonic          | nonsynonymous SN\ USH2A   | NM_206933:c.T11693C;p.I3898T   |             | 0.73 | P100 |
| chr1  | 2.14E+08 | 2.14E+08 | G | T | exonic          | synonymous SNV USH2A      | NM_206933:c.C11325A;p.I3775I   |             |      | P100 |
| chr1  | 2.14E+08 | 2.14E+08 | C | T | exonic          | synonymous SNV USH2A      | NM_206933:c.G11196A;p.Q3732Q   |             |      | P100 |
| chr1  | 2.14E+08 | 2.14E+08 | T | C | exonic          | nonsynonymous SN\ USH2A   | NM_206933:c.A10546G;p.T3516A   |             | 0.45 | P100 |
| chr1  | 2.14E+08 | 2.14E+08 | G | T | exonic          | nonsynonymous SN\ USH2A   | NM_206933:c.C10354A;p.H3452N   |             | 0.21 | P100 |
| chr1  | 2.14E+08 | 2.14E+08 | C | T | exonic          | nonsynonymous SN\ USH2A   | NM_206933:c.G9542A;p.G3181E    |             | 0    | P100 |
| chr1  | 2.14E+08 | 2.14E+08 | G | T | exonic          | nonsynonymous SN\ USH2A   | NM_206933:c.C9533A;p.S3178Y    |             | 0.03 | P100 |
| chr1  | 2.14E+08 | 2.14E+08 | G | A | exonic          | nonsynonymous SN\ USH2A   | NM_206933:c.C8798T;p.A2933V    |             | 0.37 | P100 |

|      |          |          |   |   |                 |                   |        |                                |      |      |
|------|----------|----------|---|---|-----------------|-------------------|--------|--------------------------------|------|------|
| chr1 | 2.14E+08 | 2.14E+08 | A | G | exonic          | nonsynonymous SN\ | USH2A  | NM_206933:c.T5584C;p.C1862R    | 0    | P100 |
| chr1 | 2.14E+08 | 2.14E+08 | C | A | exonic          | stopgain SNV      | USH2A  | NM_007123:c.G3862T;p.E1288X    | 0.59 | P100 |
| chr1 | 2.15E+08 | 2.15E+08 | C | A | exonic          | nonsynonymous SN\ | USH2A  | NM_007123:c.G992T;p.R331I      | 0.24 | P100 |
| chr1 | 2.15E+08 | 2.15E+08 | C | A | exonic          | nonsynonymous SN\ | USH2A  | NM_007123:c.G627T;p.K209N      | 0.66 | P100 |
| chr1 | 2.46E+08 | 2.46E+08 | G | A | exonic          | nonsynonymous SN\ | OR2M5  | NM_001004690:c.G263A;p.G88D    | 0.01 | P100 |
| chr1 | 2.46E+08 | 2.46E+08 | G | A | exonic          | nonsynonymous SN\ | OR2M5  | NM_001004690:c.G659A;p.R220Q   | 0.33 | P100 |
| chr1 | 2.46E+08 | 2.46E+08 | C | T | exonic          | synonymous SNV    | OR2M2  | NM_001004688:c.C978T;p.F326F   |      | P100 |
| chr2 | 15236657 | 15236657 | T | C | exonic          | nonsynonymous SN\ | NBAS   | NM_015909:c.A6746G;p.Q2249R    | 0.23 | P100 |
| chr2 | 15524920 | 15524920 | C | T | exonic          | nonsynonymous SN\ | NBAS   | NM_015909:c.G2081A;p.R694Q     | 0.04 | P100 |
| chr2 | 15616168 | 15616168 | C | T | exonic          | synonymous SNV    | NBAS   | NM_015909:c.G159A;p.T53T       |      | P100 |
| chr2 | 1.16E+08 | 1.16E+08 | G | T | exonic          | nonsynonymous SN\ | DPP10  | NM_001004360:c.G2014T;p.D672Y  | 0    | P100 |
| chr2 | 1.7E+08  | 1.7E+08  | G | T | exonic          | nonsynonymous SN\ | LRP2   | NM_004525:c.C13942A;p.L4648I   | 0    | P100 |
| chr2 | 1.7E+08  | 1.7E+08  | G | T | exonic          | synonymous SNV    | LRP2   | NM_004525:c.C12960A;p.I4320I   |      | P100 |
| chr2 | 1.7E+08  | 1.7E+08  | G | A | exonic          | synonymous SNV    | LRP2   | NM_004525:c.C11451T;p.C3817C   |      | P100 |
| chr2 | 1.7E+08  | 1.7E+08  | T | G | exonic          | nonsynonymous SN\ | LRP2   | NM_004525:c.A7311C;p.Q2437H    | 0    | P100 |
| chr2 | 1.7E+08  | 1.7E+08  | G | T | exonic          | nonsynonymous SN\ | LRP2   | NM_004525:c.C6188A;p.S2063Y    | 0.01 | P100 |
| chr2 | 1.7E+08  | 1.7E+08  | G | A | exonic          | synonymous SNV    | LRP2   | NM_004525:c.C5376T;p.I1792I    |      | P100 |
| chr2 | 1.7E+08  | 1.7E+08  | G | T | exonic          | nonsynonymous SN\ | LRP2   | NM_004525:c.C4189A;p.L1397I    | 0.31 | P100 |
| chr2 | 1.7E+08  | 1.7E+08  | G | T | exonic          | nonsynonymous SN\ | LRP2   | NM_004525:c.C2939A;p.P980H     | 0.15 | P100 |
| chr2 | 1.7E+08  | 1.7E+08  | C | A | exonic          | nonsynonymous SN\ | LRP2   | NM_004525:c.G2191T;p.D731Y     | 0    | P100 |
| chr2 | 1.7E+08  | 1.7E+08  | G | T | exonic          | nonsynonymous SN\ | LRP2   | NM_004525:c.C1690A;p.L564M     | 0.02 | P100 |
| chr2 | 1.7E+08  | 1.7E+08  | G | T | exonic          | synonymous SNV    | LRP2   | NM_004525:c.C1443A;p.I481I     |      | P100 |
| chr2 | 1.7E+08  | 1.7E+08  | G | A | exonic;splicing | synonymous SNV    | LRP2   | NM_004525:c.C186T;p.C62C       |      | P100 |
| chr2 | 1.9E+08  | 1.9E+08  | C | T | exonic          | nonsynonymous SN\ | COL3A1 | NM_000090:c.C1864T;p.P622S     | 0.06 | P100 |
| chr2 | 1.9E+08  | 1.9E+08  | G | A | exonic          | nonsynonymous SN\ | COL3A1 | NM_000090:c.G2633A;p.R878H     | 0    | P100 |
| chr2 | 2.02E+08 | 2.02E+08 | C | A | exonic          | synonymous SNV    | CASP8  | NM_001080125:c.C561A;p.I187I   |      | P100 |
| chr2 | 2.12E+08 | 2.12E+08 | C | T | exonic          | nonsynonymous SN\ | ERBB4  | NM_001042599:c.G3382A;p.E1128K | 0.43 | P100 |
| chr2 | 2.12E+08 | 2.12E+08 | G | A | exonic          | nonsynonymous SN\ | ERBB4  | NM_001042599:c.C3167T;p.A1056V | 0.38 | P100 |
| chr2 | 2.12E+08 | 2.12E+08 | A | G | exonic          | synonymous SNV    | ERBB4  | NM_001042599:c.T2763C;p.Y921Y  |      | P100 |
| chr2 | 2.12E+08 | 2.12E+08 | G | A | exonic          | nonsynonymous SN\ | ERBB4  | NM_001042599:c.C1834T;p.R612W  | 0.03 | P100 |
| chr2 | 2.13E+08 | 2.13E+08 | G | A | exonic          | nonsynonymous SN\ | ERBB4  | NM_001042599:c.C283T;p.R95C    | 0.02 | P100 |
| chr2 | 2.38E+08 | 2.38E+08 | C | A | exonic          | nonsynonymous SN\ | COL6A3 | NM_057166:c.G6670T;p.D2224Y    |      | P100 |
| chr2 | 2.38E+08 | 2.38E+08 | C | A | exonic          | stopgain SNV      | COL6A3 | NM_057166:c.G4501T;p.E1501X    |      | P100 |
| chr2 | 2.38E+08 | 2.38E+08 | C | A | exonic          | nonsynonymous SN\ | COL6A3 | NM_057166:c.G2561T;p.R854M     |      | P100 |
| chr2 | 2.38E+08 | 2.38E+08 | C | T | exonic          | nonsynonymous SN\ | COL6A3 | NM_057166:c.G1726A;p.D576N     |      | P100 |
| chr3 | 41254525 | 41254525 | A | G | exonic          | synonymous SNV    | CTNNB1 | NM_001098209:c.A2091G;p.G697G  |      | P100 |
| chr3 | 58099185 | 58099185 | G | T | exonic          | nonsynonymous SN\ | FLNB   | NM_001164318:c.G4998T;p.E1666D | 0.01 | P100 |
| chr3 | 58115643 | 58115643 | C | T | exonic          | synonymous SNV    | FLNB   | NM_001164319:c.C6648T;p.F2216F |      | P100 |
| chr3 | 1.25E+08 | 1.25E+08 | G | A | exonic          | synonymous SNV    | MYLK   | NM_053026:c.C4788T;p.N1596N    |      | P100 |
| chr3 | 1.25E+08 | 1.25E+08 | G | A | exonic          | synonymous SNV    | MYLK   | NM_053026:c.C4713T;p.Y1571Y    |      | P100 |
| chr3 | 1.42E+08 | 1.42E+08 | G | A | exonic          | nonsynonymous SN\ | CLSTN2 | NM_022131:c.G628A;p.D210N      | 0.03 | P100 |
| chr3 | 1.44E+08 | 1.44E+08 | C | T | exonic          | synonymous SNV    | ATR    | NM_0011184:c.G7725A;p.A2575A   |      | P100 |
| chr3 | 1.44E+08 | 1.44E+08 | T | G | exonic          | nonsynonymous SN\ | ATR    | NM_0011184:c.A7553C;p.N2518T   | 0.06 | P100 |
| chr3 | 1.44E+08 | 1.44E+08 | G | T | exonic          | nonsynonymous SN\ | ATR    | NM_0011184:c.C6542A;p.A2181D   | 0.01 | P100 |
| chr3 | 1.44E+08 | 1.44E+08 | C | T | exonic          | nonsynonymous SN\ | ATR    | NM_0011184:c.G6266A;p.R2089Q   | 0.02 | P100 |
| chr3 | 1.44E+08 | 1.44E+08 | C | A | exonic          | nonsynonymous SN\ | ATR    | NM_0011184:c.G6053T;p.S2018I   | 0.06 | P100 |
| chr3 | 1.44E+08 | 1.44E+08 | G | A | exonic          | nonsynonymous SN\ | ATR    | NM_0011184:c.C4051T;p.R1351W   | 0    | P100 |
| chr3 | 1.44E+08 | 1.44E+08 | C | A | exonic          | nonsynonymous SN\ | ATR    | NM_0011184:c.G463T;p.D155Y     | 0.02 | P100 |
| chr3 | 1.53E+08 | 1.53E+08 | C | A | exonic          | stopgain SNV      | IGSF10 | NM_001178145:c.G1807T;p.E603X  |      | P100 |
| chr3 | 1.53E+08 | 1.53E+08 | C | A | exonic          | stopgain SNV      | IGSF10 | NM_001178145:c.G1423T;p.E475X  |      | P100 |
| chr3 | 1.53E+08 | 1.53E+08 | C | A | exonic          | nonsynonymous SN\ | IGSF10 | NM_178822:c.G5844T;p.Q1948H    | 0.1  | P100 |
| chr3 | 1.53E+08 | 1.53E+08 | A | C | exonic          | nonsynonymous SN\ | IGSF10 | NM_178822:c.T5449G;p.F1817V    | 0.41 | P100 |
| chr3 | 1.53E+08 | 1.53E+08 | C | T | exonic          | synonymous SNV    | IGSF10 | NM_178822:c.G5238A;p.R1746R    |      | P100 |

|      |          |          |   |   |                 |                   |         |                               |      |      |
|------|----------|----------|---|---|-----------------|-------------------|---------|-------------------------------|------|------|
| chr3 | 1.53E+08 | 1.53E+08 | C | T | exonic          | nonsynonymous SN\ | IGSF10  | NM_178822:c.G5173A:p.A1725T   | 0.01 | P100 |
| chr3 | 1.53E+08 | 1.53E+08 | C | A | exonic          | nonsynonymous SN\ | IGSF10  | NM_178822:c.G4683T:p.Q1561H   | 0    | P100 |
| chr3 | 1.53E+08 | 1.53E+08 | C | T | exonic          | nonsynonymous SN\ | IGSF10  | NM_178822:c.G4301A:p.S1434N   | 0    | P100 |
| chr3 | 1.53E+08 | 1.53E+08 | C | A | exonic          | nonsynonymous SN\ | IGSF10  | NM_178822:c.G4168T:p.V1390F   | 0    | P100 |
| chr3 | 1.53E+08 | 1.53E+08 | G | T | exonic          | nonsynonymous SN\ | IGSF10  | NM_178822:c.C3199A:p.L1067I   | 0    | P100 |
| chr3 | 1.53E+08 | 1.53E+08 | C | T | exonic          | synonymous SNV    | IGSF10  | NM_178822:c.G3015A:p.P1005P   |      | P100 |
| chr3 | 1.53E+08 | 1.53E+08 | C | A | exonic          | stopgain SNV      | IGSF10  | NM_178822:c.G1708T:p.E570X    | 0.25 | P100 |
| chr3 | 1.85E+08 | 1.85E+08 | C | A | exonic          | nonsynonymous SN\ | DVL3    | NM_004423:c.C410A:p.S137Y     | 0.01 | P100 |
| chr4 | 54833434 | 54833434 | G | T | exonic          | nonsynonymous SN\ | PDGFRA  | NM_006206:c.G1354T:p.D452Y    | 0.03 | P100 |
| chr4 | 54835886 | 54835886 | G | T | exonic          | nonsynonymous SN\ | PDGFRA  | NM_006206:c.G1775T:p.G592V    | 0.11 | P100 |
| chr4 | 54846866 | 54846866 | G | A | exonic          | synonymous SNV    | PDGFRA  | NM_006206:c.G2541A:p.S847S    |      | P100 |
| chr4 | 54850038 | 54850038 | G | A | exonic;splicing | synonymous SNV    | PDGFRA  | NM_006206:c.G2880A:p.K960K    |      | P100 |
| chr4 | 82275422 | 82275422 | C | T | exonic          | nonsynonymous SN\ | PRKG2   | NM_006259:c.G1687A:p.A563T    | 0.01 | P100 |
| chr4 | 82277640 | 82277640 | T | C | exonic          | nonsynonymous SN\ | PRKG2   | NM_006259:c.A1565G:p.D522G    | 0    | P100 |
| chr4 | 82315039 | 82315039 | C | A | exonic          | nonsynonymous SN\ | PRKG2   | NM_006259:c.G560T:p.R187I     | 0.11 | P100 |
| chr4 | 82344772 | 82344772 | C | A | exonic          | nonsynonymous SN\ | PRKG2   | NM_006259:c.G454T:p.D152Y     | 0.02 | P100 |
| chr4 | 1.26E+08 | 1.26E+08 | C | T | exonic          | nonsynonymous SN\ | FAT4    | NM_024582:c.C862T:p.R288C     |      | P100 |
| chr4 | 1.26E+08 | 1.26E+08 | G | T | exonic          | stopgain SNV      | FAT4    | NM_024582:c.G2260T:p.E754X    |      | P100 |
| chr4 | 1.26E+08 | 1.26E+08 | A | G | exonic          | synonymous SNV    | FAT4    | NM_024582:c.A3717G:p.E1239E   |      | P100 |
| chr4 | 1.26E+08 | 1.26E+08 | A | G | exonic          | nonsynonymous SN\ | FAT4    | NM_024582:c.A3832G:p.T1278A   |      | P100 |
| chr4 | 1.26E+08 | 1.26E+08 | G | T | exonic          | nonsynonymous SN\ | FAT4    | NM_024582:c.G5159T:p.R1720I   |      | P100 |
| chr4 | 1.27E+08 | 1.27E+08 | C | T | exonic          | nonsynonymous SN\ | FAT4    | NM_024582:c.C5597T:p.T1866M   | 0.06 | P100 |
| chr4 | 1.27E+08 | 1.27E+08 | T | G | exonic          | nonsynonymous SN\ | FAT4    | NM_024582:c.T6858G:p.D2286E   | 0    | P100 |
| chr4 | 1.27E+08 | 1.27E+08 | G | T | exonic          | nonsynonymous SN\ | FAT4    | NM_024582:c.G7893T:p.K2631N   | 0.39 | P100 |
| chr4 | 1.27E+08 | 1.27E+08 | C | T | exonic          | synonymous SNV    | FAT4    | NM_024582:c.C8409T:p.I2803I   |      | P100 |
| chr4 | 1.27E+08 | 1.27E+08 | C | A | exonic          | nonsynonymous SN\ | FAT4    | NM_024582:c.C9422A:p.S3141Y   | 0.03 | P100 |
| chr4 | 1.27E+08 | 1.27E+08 | C | A | exonic          | synonymous SNV    | FAT4    | NM_024582:c.C9921A:p.I3307I   |      | P100 |
| chr4 | 1.27E+08 | 1.27E+08 | G | T | exonic          | nonsynonymous SN\ | FAT4    | NM_024582:c.G10504T:p.D3502Y  | 0    | P100 |
| chr4 | 1.27E+08 | 1.27E+08 | T | G | exonic          | nonsynonymous SN\ | FAT4    | NM_024582:c.T10764G:p.D3588E  | 0    | P100 |
| chr4 | 1.27E+08 | 1.27E+08 | C | A | exonic          | nonsynonymous SN\ | FAT4    | NM_024582:c.C11452A:p.L3818I  | 0.08 | P100 |
| chr4 | 1.27E+08 | 1.27E+08 | G | A | exonic          | nonsynonymous SN\ | FAT4    | NM_024582:c.G11476A:p.V3826I  | 0.26 | P100 |
| chr4 | 1.27E+08 | 1.27E+08 | A | G | exonic          | synonymous SNV    | FAT4    | NM_024582:c.A14358G:p.G4786G  |      | P100 |
| chr4 | 1.55E+08 | 1.55E+08 | G | T | exonic          | nonsynonymous SN\ | DCHS2   | NM_017639:c.C8287A:p.L2763I   | 0.4  | P100 |
| chr4 | 1.55E+08 | 1.55E+08 | G | A | exonic          | nonsynonymous SN\ | DCHS2   | NM_017639:c.C7028T:p.A2343V   | 0.58 | P100 |
| chr4 | 1.55E+08 | 1.55E+08 | G | A | exonic          | synonymous SNV    | DCHS2   | NM_017639:c.C7015T:p.L2339L   |      | P100 |
| chr4 | 1.55E+08 | 1.55E+08 | G | A | exonic          | synonymous SNV    | DCHS2   | NM_017639:c.C6447T:p.F2149F   |      | P100 |
| chr4 | 1.55E+08 | 1.55E+08 | G | A | exonic          | synonymous SNV    | DCHS2   | NM_017639:c.C6088T:p.L2030L   |      | P100 |
| chr4 | 1.55E+08 | 1.55E+08 | G | A | exonic          | synonymous SNV    | DCHS2   | NM_017639:c.C5947T:p.L1983L   |      | P100 |
| chr4 | 1.55E+08 | 1.55E+08 | C | A | exonic          | nonsynonymous SN\ | DCHS2   | NM_017639:c.G5035T:p.D1679Y   | 0.16 | P100 |
| chr4 | 1.55E+08 | 1.55E+08 | C | A | exonic          | stopgain SNV      | DCHS2   | NM_017639:c.G4909T:p.E1637X   | 0.71 | P100 |
| chr4 | 1.55E+08 | 1.55E+08 | C | A | exonic          | stopgain SNV      | DCHS2   | NM_017639:c.G4465T:p.E1489X   | 0    | P100 |
| chr4 | 1.55E+08 | 1.55E+08 | C | T | exonic          | nonsynonymous SN\ | DCHS2   | NM_017639:c.G3010A:p.G1004R   | 0    | P100 |
| chr4 | 1.55E+08 | 1.55E+08 | G | A | exonic          | synonymous SNV    | DCHS2   | NM_001142552:c.C2580T:p.A860A |      | P100 |
| chr4 | 1.55E+08 | 1.55E+08 | T | C | exonic          | nonsynonymous SN\ | DCHS2   | NM_001142552:c.A2491G:p.T831A | 0.12 | P100 |
| chr4 | 1.57E+08 | 1.57E+08 | C | A | exonic          | nonsynonymous SN\ | GUCY1A3 | NM_001130684:c.C571A:p.L191I  | 0.18 | P100 |
| chr4 | 1.57E+08 | 1.57E+08 | G | T | exonic          | nonsynonymous SN\ | GUCY1A3 | NM_001130684:c.G1347T:p.K449N | 0    | P100 |
| chr5 | 7467742  | 7467742  | C | A | exonic          | nonsynonymous SN\ | ADCY2   | NM_020546:c.C267A:p.F89L      |      | P100 |
| chr5 | 7743856  | 7743856  | C | T | exonic          | nonsynonymous SN\ | ADCY2   | NM_020546:c.C773T:p.A258V     | 0.01 | P100 |
| chr5 | 7855464  | 7855464  | C | G | exonic          | nonsynonymous SN\ | ADCY2   | NM_020546:c.C2762G:p.A921G    | 0.02 | P100 |
| chr5 | 7870075  | 7870075  | G | A | exonic          | nonsynonymous SN\ | ADCY2   | NM_020546:c.G2980A:p.D994N    | 1    | P100 |
| chr5 | 24541040 | 24541040 | G | A | exonic          | nonsynonymous SN\ | CDH10   | NM_006727:c.C1331T:p.S444L    | 0.29 | P100 |
| chr5 | 24573324 | 24573324 | T | G | exonic          | nonsynonymous SN\ | CDH10   | NM_006727:c.A448C:p.I150L     | 0.13 | P100 |
| chr5 | 24573425 | 24573425 | C | T | exonic          | nonsynonymous SN\ | CDH10   | NM_006727:c.G347A:p.R116Q     | 0.08 | P100 |

|      |          |          |   |   |          |                   |         |                                |      |      |
|------|----------|----------|---|---|----------|-------------------|---------|--------------------------------|------|------|
| chr5 | 26917219 | 26917219 | C | T | exonic   | nonsynonymous SN\ | CDH9    | NM_016279:c.G2153A;p.R718Q     | 0.61 | P100 |
| chr5 | 26921524 | 26921524 | G | A | exonic   | nonsynonymous SN\ | CDH9    | NM_016279:c.C1838T;p.T613M     | 0.11 | P100 |
| chr5 | 26921602 | 26921602 | C | T | exonic   | nonsynonymous SN\ | CDH9    | NM_016279:c.G1760A;p.R587H     | 0.01 | P100 |
| chr5 | 26925743 | 26925743 | A | G | exonic   | nonsynonymous SN\ | CDH9    | NM_016279:c.T1471C;p.Y491H     | 0.54 | P100 |
| chr5 | 26951657 | 26951657 | T | G | exonic   | nonsynonymous SN\ | CDH9    | NM_016279:c.A361C;p.K121Q      | 0.31 | P100 |
| chr5 | 26951676 | 26951676 | C | A | exonic   | nonsynonymous SN\ | CDH9    | NM_016279:c.G342T;p.K114N      | 0.01 | P100 |
| chr5 | 40800640 | 40800640 | C | T | exonic   | nonsynonymous SN\ | PRKAA1  | NM_006251:c.G1279A;p.A427T     | 0    | P100 |
| chr5 | 82821996 | 82821996 | G | A | exonic   | nonsynonymous SN\ | VCAN    | NM_001126336:c.G394A;p.V132I   | 0.01 | P100 |
| chr5 | 82825416 | 82825416 | G | T | exonic   | nonsynonymous SN\ | VCAN    | NM_001126336:c.G658T;p.D220Y   | 0    | P100 |
| chr5 | 82852986 | 82852986 | C | A | exonic   | nonsynonymous SN\ | VCAN    | NM_001164098:c.C3105A;p.F1035L | 0.01 | P100 |
| chr5 | 82853372 | 82853372 | T | G | exonic   | nonsynonymous SN\ | VCAN    | NM_001164098:c.T3491G;p.L1164R | 0    | P100 |
| chr5 | 82853561 | 82853561 | C | A | exonic   | nonsynonymous SN\ | VCAN    | NM_001164098:c.C3680A;p.S1227Y | 0    | P100 |
| chr5 | 82869508 | 82869508 | G | T | exonic   | stopgain SNV      | VCAN    | NM_001164097:c.G1969T;p.E657X  | 0    | P100 |
| chr5 | 82870048 | 82870048 | C | T | exonic   | nonsynonymous SN\ | VCAN    | NM_001164097:c.C2509T;p.L837F  | 0    | P100 |
| chr5 | 82871007 | 82871007 | G | A | exonic   | synonymous SNV    | VCAN    | NM_001164097:c.G3468A;p.Q1156G | 0    | P100 |
| chr5 | 82872145 | 82872145 | C | T | exonic   | nonsynonymous SN\ | VCAN    | NM_001164097:c.C4606T;p.R1536C | 0    | P100 |
| chr5 | 82879576 | 82879576 | G | A | exonic   | nonsynonymous SN\ | VCAN    | NM_001126336:c.G1187A;p.R396H  | 0.02 | P100 |
| chr5 | 82911738 | 82911738 | G | A | splicing |                   | VCAN    |                                | 0    | P100 |
| chr5 | 1.12E+08 | 1.12E+08 | C | T | exonic   | nonsynonymous SN\ | APC     | NM_001127511:c.C44T;p.A15V     | 0    | P100 |
| chr5 | 1.12E+08 | 1.12E+08 | C | T | exonic   | stopgain SNV      | APC     | NM_001127511:c.C3286T;p.R1096X | 0    | P100 |
| chr5 | 1.12E+08 | 1.12E+08 | A | G | exonic   | nonsynonymous SN\ | APC     | NM_001127511:c.A3823G;p.T1275A | 0.17 | P100 |
| chr5 | 1.12E+08 | 1.12E+08 | G | T | exonic   | stopgain SNV      | APC     | NM_001127511:c.G3871T;p.E1291X | 0.29 | P100 |
| chr5 | 1.12E+08 | 1.12E+08 | C | T | exonic   | stopgain SNV      | APC     | NM_001127511:c.C4294T;p.R1432X | 0.04 | P100 |
| chr5 | 1.12E+08 | 1.12E+08 | A | G | exonic   | nonsynonymous SN\ | APC     | NM_001127511:c.A4535G;p.E1512G | 0.01 | P100 |
| chr5 | 1.12E+08 | 1.12E+08 | C | T | exonic   | stopgain SNV      | APC     | NM_001127511:c.C6655T;p.R2219X | 0.04 | P100 |
| chr5 | 1.31E+08 | 1.31E+08 | C | T | exonic   | nonsynonymous SN\ | ACSL6   | NM_001009185:c.G907A;p.G303S   | 0    | P100 |
| chr5 | 1.38E+08 | 1.38E+08 | G | A | exonic   | synonymous SNV    | CTNNA1  | NM_001903:c.G210A;p.E70E       | 0    | P100 |
| chr5 | 1.38E+08 | 1.38E+08 | C | A | exonic   | nonsynonymous SN\ | CTNNA1  | NM_001903:c.C1456A;p.L486I     | 0.27 | P100 |
| chr5 | 1.38E+08 | 1.38E+08 | G | A | exonic   | nonsynonymous SN\ | CTNNA1  | NM_001903:c.G2345A;p.R782H     | 0    | P100 |
| chr5 | 1.4E+08  | 1.4E+08  | G | A | exonic   | synonymous SNV    | PCDHA1  | NM_018900:c.G1515A;p.S505S     | 0    | P100 |
| chr5 | 1.4E+08  | 1.4E+08  | G | A | exonic   | nonsynonymous SN\ | PCDHA2  | NM_018905:c.G1852A;p.A618T     | 0.88 | P100 |
| chr5 | 1.4E+08  | 1.4E+08  | C | T | exonic   | nonsynonymous SN\ | PCDHA2  | NM_018905:c.C2060T;p.A687V     | 0.43 | P100 |
| chr5 | 1.4E+08  | 1.4E+08  | G | A | exonic   | nonsynonymous SN\ | PCDHA3  | NM_018906:c.G1849A;p.G617S     | 0.83 | P100 |
| chr5 | 1.4E+08  | 1.4E+08  | G | A | exonic   | nonsynonymous SN\ | PCDHA4  | NM_018907:c.G1246A;p.E416K     | 0    | P100 |
| chr5 | 1.4E+08  | 1.4E+08  | G | A | exonic   | synonymous SNV    | PCDHA4  | NM_018907:c.G1650A;p.T550T     | 0    | P100 |
| chr5 | 1.4E+08  | 1.4E+08  | G | A | exonic   | nonsynonymous SN\ | PCDHA4  | NM_018907:c.G2158A;p.A720T     | 0    | P100 |
| chr5 | 1.4E+08  | 1.4E+08  | G | A | exonic   | synonymous SNV    | PCDHA5  | NM_018908:c.G387A;p.P129P      | 0    | P100 |
| chr5 | 1.4E+08  | 1.4E+08  | C | T | exonic   | synonymous SNV    | PCDHA5  | NM_018908:c.C1230T;p.S410S     | 0    | P100 |
| chr5 | 1.4E+08  | 1.4E+08  | G | A | exonic   | synonymous SNV    | PCDHA6  | NM_018909:c.G1296A;p.S432S     | 0    | P100 |
| chr5 | 1.4E+08  | 1.4E+08  | G | A | exonic   | synonymous SNV    | PCDHA7  | NM_018910:c.G1296A;p.S432S     | 0    | P100 |
| chr5 | 1.4E+08  | 1.4E+08  | G | A | exonic   | synonymous SNV    | PCDHA7  | NM_018910:c.G2040A;p.S680S     | 0    | P100 |
| chr5 | 1.4E+08  | 1.4E+08  | G | A | exonic   | nonsynonymous SN\ | PCDHA11 | NM_018902:c.G1928A;p.R643H     | 0    | P100 |
| chr5 | 1.4E+08  | 1.4E+08  | G | A | exonic   | synonymous SNV    | PCDHA11 | NM_018902:c.G2250A;p.S750S     | 0    | P100 |
| chr5 | 1.4E+08  | 1.4E+08  | G | T | exonic   | nonsynonymous SN\ | PCDHA11 | NM_018902:c.G2283T;p.E761D     | 0    | P100 |
| chr5 | 1.4E+08  | 1.4E+08  | A | C | exonic   | nonsynonymous SN\ | PCDHAC1 | NM_018898:c.A326C;p.K109T      | 0.09 | P100 |
| chr5 | 1.4E+08  | 1.4E+08  | G | A | exonic   | nonsynonymous SN\ | PCDHAC1 | NM_018898:c.G1003A;p.D335N     | 0    | P100 |
| chr5 | 1.4E+08  | 1.4E+08  | G | A | exonic   | nonsynonymous SN\ | PCDHAC1 | NM_018898:c.G1015A;p.E339K     | 0.02 | P100 |
| chr5 | 1.4E+08  | 1.4E+08  | G | A | exonic   | nonsynonymous SN\ | PCDHAC1 | NM_018898:c.G2143A;p.A715T     | 0.54 | P100 |
| chr5 | 1.4E+08  | 1.4E+08  | G | A | exonic   | nonsynonymous SN\ | PCDHAC1 | NM_018898:c.G2335A;p.D779N     | 0.48 | P100 |
| chr5 | 1.4E+08  | 1.4E+08  | G | T | exonic   | stopgain SNV      | PCDHB1  | NM_013340:c.G898T;p.E300X      | 0.09 | P100 |
| chr5 | 1.4E+08  | 1.4E+08  | C | T | exonic   | stopgain SNV      | PCDHB1  | NM_013340:c.C1384T;p.R462X     | 0.11 | P100 |
| chr5 | 1.4E+08  | 1.4E+08  | G | A | exonic   | nonsynonymous SN\ | PCDHB1  | NM_013340:c.G2252A;p.R751Q     | 1    | P100 |
| chr5 | 1.4E+08  | 1.4E+08  | C | A | exonic   | nonsynonymous SN\ | PCDHB3  | NM_018937:c.C71A;p.S24Y        | 0.29 | P100 |

rs7716092

|      |          |          |   |   |        |                   |         |                              |      |      |
|------|----------|----------|---|---|--------|-------------------|---------|------------------------------|------|------|
| chr5 | 1.4E+08  | 1.4E+08  | A | C | exonic | nonsynonymous SN\ | PCDHB3  | NM_018937:c.A523C:p.N175H    | 0.04 | P100 |
| chr5 | 1.4E+08  | 1.4E+08  | G | A | exonic | synonymous SNV    | PCDHB3  | NM_018937:c.G633A:p.T211T    |      | P100 |
| chr5 | 1.4E+08  | 1.4E+08  | G | T | exonic | nonsynonymous SN\ | PCDHB5  | NM_015669:c.G559T:p.D187Y    | 0    | P100 |
| chr5 | 1.41E+08 | 1.41E+08 | G | A | exonic | synonymous SNV    | PCDHB6  | NM_018939:c.G2301A:p.P767P   |      | P100 |
| chr5 | 1.41E+08 | 1.41E+08 | G | A | exonic | nonsynonymous SN\ | PCDHB7  | NM_018940:c.G826A:p.E276K    | 0.28 | P100 |
| chr5 | 1.41E+08 | 1.41E+08 | G | T | exonic | nonsynonymous SN\ | PCDHB7  | NM_018940:c.G860T:p.R287I    | 0.06 | P100 |
| chr5 | 1.41E+08 | 1.41E+08 | G | A | exonic | nonsynonymous SN\ | PCDHB7  | NM_018940:c.G1273A:p.D425N   | 0    | P100 |
| chr5 | 1.41E+08 | 1.41E+08 | C | T | exonic | nonsynonymous SN\ | PCDHB10 | NM_018930:c.C2321T:p.S774L   | 0    | P100 |
| chr5 | 1.41E+08 | 1.41E+08 | C | T | exonic | synonymous SNV    | PCDHB11 | NM_018931:c.C2220T:p.S740S   |      | P100 |
| chr5 | 1.41E+08 | 1.41E+08 | C | T | exonic | nonsynonymous SN\ | PCDHB13 | NM_018933:c.C1214T:p.T405M   | 0    | P100 |
| chr5 | 1.41E+08 | 1.41E+08 | C | T | exonic | nonsynonymous SN\ | PCDHB13 | NM_018933:c.C1244T:p.A415V   | 0.02 | P100 |
| chr5 | 1.51E+08 | 1.51E+08 | G | A | exonic | synonymous SNV    | FAT2    | NM_001447:c.C12642T:p.V4214V |      | P100 |
| chr5 | 1.51E+08 | 1.51E+08 | C | T | exonic | synonymous SNV    | FAT2    | NM_001447:c.G11223A:p.V3741V |      | P100 |
| chr5 | 1.51E+08 | 1.51E+08 | C | A | exonic | stopgain SNV      | FAT2    | NM_001447:c.G8584T:p.E2862X  | 0.09 | P100 |
| chr5 | 1.51E+08 | 1.51E+08 | G | T | exonic | nonsynonymous SN\ | FAT2    | NM_001447:c.C6761A:p.S2254Y  | 0.02 | P100 |
| chr5 | 1.51E+08 | 1.51E+08 | G | A | exonic | nonsynonymous SN\ | FAT2    | NM_001447:c.C1138T:p.R380C   | 0.18 | P100 |
| chr5 | 1.51E+08 | 1.51E+08 | C | A | exonic | nonsynonymous SN\ | FAT2    | NM_001447:c.G753T:p.R251S    | 0.46 | P100 |
| chr5 | 1.69E+08 | 1.69E+08 | C | T | exonic | nonsynonymous SN\ | DOCK2   | NM_004946:c.C1180T:p.R394C   | 0    | P100 |
| chr5 | 1.69E+08 | 1.69E+08 | C | A | exonic | synonymous SNV    | DOCK2   | NM_004946:c.C1344A:p.V448V   |      | P100 |
| chr5 | 1.69E+08 | 1.69E+08 | G | A | exonic | nonsynonymous SN\ | DOCK2   | NM_004946:c.G2534A:p.S845N   | 0.02 | P100 |
| chr5 | 1.69E+08 | 1.69E+08 | C | T | exonic | synonymous SNV    | DOCK2   | NM_004946:c.C3069T:p.F1023F  |      | P100 |
| chr6 | 90717625 | 90717625 | G | A | exonic | synonymous SNV    | BACH2   | NM_001170794:c.C921T:p.V307V |      | P100 |
| chr6 | 90718106 | 90718106 | G | A | exonic | nonsynonymous SN\ | BACH2   | NM_001170794:c.C440T:p.A147V | 0.02 | P100 |
| chr6 | 90718224 | 90718224 | C | T | exonic | nonsynonymous SN\ | BACH2   | NM_001170794:c.G322A:p.E108K | 0.01 | P100 |
| chr6 | 90775189 | 90775189 | T | G | exonic | nonsynonymous SN\ | BACH2   | NM_001170794:c.A96C:p.K32N   | 0.02 | P100 |
| chr6 | 1.12E+08 | 1.12E+08 | C | T | exonic | synonymous SNV    | FYN     | NM_153047:c.G1443A:p.R481R   |      | P100 |
| chr6 | 1.12E+08 | 1.12E+08 | T | C | exonic | synonymous SNV    | FYN     | NM_002037:c.A828G:p.R276R    |      | P100 |
| chr6 | 1.12E+08 | 1.12E+08 | A | C | exonic | nonsynonymous SN\ | FYN     | NM_153047:c.T408G:p.N136K    | 0    | P100 |
| chr6 | 1.12E+08 | 1.12E+08 | T | C | exonic | nonsynonymous SN\ | FYN     | NM_153047:c.A244G:p.T82A     | 0.59 | P100 |
| chr6 | 1.29E+08 | 1.29E+08 | C | T | exonic | nonsynonymous SN\ | LAMA2   | NM_000426:c.C410T:p.A137V    | 0    | P100 |
| chr6 | 1.3E+08  | 1.3E+08  | G | T | exonic | nonsynonymous SN\ | LAMA2   | NM_000426:c.G815T:p.R272I    | 0.09 | P100 |
| chr6 | 1.3E+08  | 1.3E+08  | G | A | exonic | nonsynonymous SN\ | LAMA2   | NM_000426:c.G3086A:p.R1029Q  | 0.16 | P100 |
| chr6 | 1.3E+08  | 1.3E+08  | C | A | exonic | synonymous SNV    | LAMA2   | NM_000426:c.C5526A:p.A1842A  |      | P100 |
| chr6 | 1.3E+08  | 1.3E+08  | C | A | exonic | nonsynonymous SN\ | LAMA2   | NM_000426:c.C6175A:p.H2059N  | 0.18 | P100 |
| chr6 | 1.46E+08 | 1.46E+08 | G | A | exonic | nonsynonymous SN\ | GRM1    | NM_000838:c.G431A:p.G144D    | 0.04 | P100 |
| chr6 | 1.47E+08 | 1.47E+08 | C | T | exonic | synonymous SNV    | GRM1    | NM_000838:c.C1335T:p.I445I   |      | P100 |
| chr6 | 1.47E+08 | 1.47E+08 | G | A | exonic | nonsynonymous SN\ | GRM1    | NM_000838:c.G1423A:p.A475T   | 0.33 | P100 |
| chr6 | 1.47E+08 | 1.47E+08 | G | T | exonic | nonsynonymous SN\ | GRM1    | NM_000838:c.G1596T:p.Q532H   | 0.02 | P100 |
| chr6 | 1.53E+08 | 1.53E+08 | C | A | exonic | stopgain SNV      | SYNE1   | NM_133650:c.G1963T:p.E655X   | 0.08 | P100 |
| chr6 | 1.53E+08 | 1.53E+08 | G | A | exonic | nonsynonymous SN\ | SYNE1   | NM_133650:c.C404T:p.T135M    | 0    | P100 |
| chr6 | 1.53E+08 | 1.53E+08 | G | A | exonic | synonymous SNV    | SYNE1   | NM_133650:c.C378T:p.A126A    |      | P100 |
| chr6 | 1.53E+08 | 1.53E+08 | C | A | exonic | stopgain SNV      | SYNE1   | NM_015293:c.G7009T:p.E2337X  | 0    | P100 |
| chr6 | 1.53E+08 | 1.53E+08 | G | A | exonic | nonsynonymous SN\ | SYNE1   | NM_015293:c.C6829T:p.R2277C  | 0    | P100 |
| chr6 | 1.53E+08 | 1.53E+08 | G | A | exonic | nonsynonymous SN\ | SYNE1   | NM_015293:c.C6352T:p.P2118S  | 0.42 | P100 |
| chr6 | 1.53E+08 | 1.53E+08 | C | A | exonic | nonsynonymous SN\ | SYNE1   | NM_015293:c.G4809T:p.E1603D  | 0.11 | P100 |
| chr6 | 1.53E+08 | 1.53E+08 | C | T | exonic | nonsynonymous SN\ | SYNE1   | NM_015293:c.G3361A:p.D1121N  | 0    | P100 |
| chr6 | 1.53E+08 | 1.53E+08 | T | C | exonic | nonsynonymous SN\ | SYNE1   | NM_015293:c.A3141G:p.I1047M  | 0.03 | P100 |
| chr6 | 1.53E+08 | 1.53E+08 | C | T | exonic | synonymous SNV    | SYNE1   | NM_015293:c.G1899A:p.A633A   |      | P100 |
| chr6 | 1.53E+08 | 1.53E+08 | G | A | exonic | synonymous SNV    | SYNE1   | NM_015293:c.C1566T:p.S522S   |      | P100 |
| chr6 | 1.53E+08 | 1.53E+08 | T | A | exonic | nonsynonymous SN\ | SYNE1   | NM_015293:c.A1311T:p.K437N   | 0.13 | P100 |
| chr6 | 1.53E+08 | 1.53E+08 | G | T | exonic | nonsynonymous SN\ | SYNE1   | NM_015293:c.C700A:p.H234N    | 0.18 | P100 |
| chr6 | 1.53E+08 | 1.53E+08 | G | T | exonic | nonsynonymous SN\ | SYNE1   | NM_015293:c.C380A:p.S127Y    | 0.1  | P100 |
| chr6 | 1.53E+08 | 1.53E+08 | C | A | exonic | stopgain SNV      | SYNE1   | NM_015293:c.G295T:p.E99X     | 0    | P100 |

|      |          |          |   |   |                 |                   |        |                                 |            |      |      |
|------|----------|----------|---|---|-----------------|-------------------|--------|---------------------------------|------------|------|------|
| chr6 | 1.53E+08 | 1.53E+08 | G | A | exonic          | nonsynonymous SN\ | SYNE1  | NM_033071:c.C14008T;p.R4670C    | 0.03       | P100 |      |
| chr6 | 1.53E+08 | 1.53E+08 | T | C | exonic          | nonsynonymous SN\ | SYNE1  | NM_033071:c.A13153G;p.T4385A    | 0.17       | P100 |      |
| chr6 | 1.53E+08 | 1.53E+08 | T | C | exonic          | nonsynonymous SN\ | SYNE1  | NM_033071:c.A11758G;p.I3920V    | 0.93       | P100 |      |
| chr6 | 1.53E+08 | 1.53E+08 | T | G | exonic          | nonsynonymous SN\ | SYNE1  | NM_033071:c.A11492C;p.K3831T    | 0.03       | P100 |      |
| chr6 | 1.53E+08 | 1.53E+08 | A | G | exonic          | nonsynonymous SN\ | SYNE1  | NM_033071:c.T10061C;p.V3354A    | 0.01       | P100 |      |
| chr6 | 1.53E+08 | 1.53E+08 | C | A | exonic          | nonsynonymous SN\ | SYNE1  | NM_033071:c.G9150T;p.L3050F     | 0.02       | P100 |      |
| chr6 | 1.53E+08 | 1.53E+08 | G | T | exonic          | synonymous SNV    | SYNE1  | NM_033071:c.C7329A;p.T2443T     |            | P100 |      |
| chr6 | 1.53E+08 | 1.53E+08 | G | A | exonic          | synonymous SNV    | SYNE1  | NM_033071:c.C6516T;p.S2172S     |            | P100 |      |
| chr6 | 1.53E+08 | 1.53E+08 | G | T | exonic          | nonsynonymous SN\ | SYNE1  | NM_033071:c.C6382A;p.L2128I     | 0.79       | P100 |      |
| chr6 | 1.53E+08 | 1.53E+08 | G | A | exonic          | stopgain SNV      | SYNE1  | NM_033071:c.C6034T;p.R2012X     | 0.84       | P100 |      |
| chr6 | 1.53E+08 | 1.53E+08 | G | A | exonic          | synonymous SNV    | SYNE1  | NM_033071:c.C5664T;p.S1888S     |            | P100 |      |
| chr6 | 1.53E+08 | 1.53E+08 | A | G | exonic          | nonsynonymous SN\ | SYNE1  | NM_033071:c.T5578C;p.F1860L     | 0.41       | P100 |      |
| chr6 | 1.53E+08 | 1.53E+08 | G | T | exonic          | nonsynonymous SN\ | SYNE1  | NM_033071:c.C5516A;p.S1839Y     | 0.07       | P100 |      |
| chr6 | 1.53E+08 | 1.53E+08 | C | A | exonic          | nonsynonymous SN\ | SYNE1  | NM_033071:c.G4905T;p.E1635D     | 0.42       | P100 |      |
| chr6 | 1.53E+08 | 1.53E+08 | C | A | exonic          | nonsynonymous SN\ | SYNE1  | NM_033071:c.G4635T;p.E1545D     | 0.94       | P100 |      |
| chr6 | 1.53E+08 | 1.53E+08 | G | A | exonic          | nonsynonymous SN\ | SYNE1  | NM_033071:c.C3911T;p.A1304V     | rs35378260 | 0.51 | P100 |
| chr6 | 1.53E+08 | 1.53E+08 | T | G | splicing        |                   | SYNE1  |                                 |            | P100 |      |
| chr6 | 1.53E+08 | 1.53E+08 | G | A | exonic          | synonymous SNV    | SYNE1  | NM_033071:c.C3264T;p.I1088I     |            | P100 |      |
| chr6 | 1.53E+08 | 1.53E+08 | G | T | exonic          | nonsynonymous SN\ | SYNE1  | NM_033071:c.C1433A;p.S478Y      | 0          | P100 |      |
| chr6 | 1.53E+08 | 1.53E+08 | G | T | exonic          | synonymous SNV    | SYNE1  | NM_033071:c.C840A;p.T280T       |            | P100 |      |
| chr6 | 1.53E+08 | 1.53E+08 | C | A | exonic          | nonsynonymous SN\ | SYNE1  | NM_033071:c.G625T;p.D209Y       | 0          | P100 |      |
| chr6 | 1.53E+08 | 1.53E+08 | C | A | exonic          | nonsynonymous SN\ | SYNE1  | NM_033071:c.G564T;p.K188N       | 0.02       | P100 |      |
| chr6 | 1.53E+08 | 1.53E+08 | G | A | exonic          | nonsynonymous SN\ | SYNE1  | NM_033071:c.C34T;p.R12W         | 0          | P100 |      |
| chr6 | 1.66E+08 | 1.66E+08 | C | A | exonic          | nonsynonymous SN\ | PDE10A | NM_001130690:c.G1096T;p.V366L   | 0.05       | P100 |      |
| chr6 | 1.66E+08 | 1.66E+08 | C | A | exonic          | nonsynonymous SN\ | PDE10A | NM_001130690:c.G232T;p.D78Y     | 0.32       | P100 |      |
| chr6 | 1.69E+08 | 1.69E+08 | C | T | exonic          | nonsynonymous SN\ | THBS2  | NM_003247:c.G2995A;p.A999T      | 0          | P100 |      |
| chr6 | 1.69E+08 | 1.69E+08 | C | T | exonic          | nonsynonymous SN\ | THBS2  | NM_003247:c.G340A;p.E114K       | 0.13       | P100 |      |
| chr6 | 1.69E+08 | 1.69E+08 | C | A | exonic          | nonsynonymous SN\ | THBS2  | NM_003247:c.G228T;p.K76N        | 0.2        | P100 |      |
| chr6 | 1.69E+08 | 1.69E+08 | G | A | exonic          | nonsynonymous SN\ | THBS2  | NM_003247:c.C175T;p.R59C        | 0.02       | P100 |      |
| chr6 | 1.69E+08 | 1.69E+08 | C | A | exonic          | nonsynonymous SN\ | THBS2  | NM_003247:c.G70T;p.D24Y         | 0.01       | P100 |      |
| chr7 | 36893749 | 36893749 | C | T | exonic          | nonsynonymous SN\ | ELMO1  | NM_001039459:c.G215A;p.R72H     | 0          | P100 |      |
| chr7 | 37217541 | 37217541 | C | T | exonic          | nonsynonymous SN\ | ELMO1  | NM_014800:c.G1061A;p.R354Q      | 0.21       | P100 |      |
| chr7 | 47935397 | 47935397 | G | T | exonic          | nonsynonymous SN\ | PKD1L1 | NM_138295:c.C989A;p.S330Y       | 0.05       | P100 |      |
| chr7 | 81219503 | 81219503 | G | A | exonic          | nonsynonymous SN\ | HGF    | NM_000601:c.C494T;p.S165L       | 0.01       | P100 |      |
| chr7 | 90733452 | 90733452 | G | A | exonic          | nonsynonymous SN\ | FZD1   | NM_003505:c.G1321A;p.E441K      | 0.02       | P100 |      |
| chr7 | 91459453 | 91459453 | T | G | exonic          | nonsynonymous SN\ | AKAP9  | NM_005751:c.T397G;p.L133V       | 0.14       | P100 |      |
| chr7 | 91470099 | 91470099 | G | T | exonic          | stopgain SNV      | AKAP9  | NM_005751:c.G2932T;p.E978X      | 0.1        | P100 |      |
| chr7 | 91497159 | 91497159 | C | T | exonic          | nonsynonymous SN\ | AKAP9  | NM_005751:c.C4163T;p.S1388L     | 0          | P100 |      |
| chr7 | 91544169 | 91544169 | T | G | exonic          | nonsynonymous SN\ | AKAP9  | NM_005751:c.T6677G;p.V2226G     | 0          | P100 |      |
| chr7 | 93879889 | 93879889 | G | A | exonic          | nonsynonymous SN\ | COL1A2 | NM_000089:c.G1462A;p.E488K      | 0.24       | P100 |      |
| chr7 | 93893253 | 93893253 | C | A | exonic          | nonsynonymous SN\ | COL1A2 | NM_000089:c.C2951A;p.S984Y      | 0.02       | P100 |      |
| chr7 | 93893736 | 93893736 | C | T | exonic          | synonymous SNV    | COL1A2 | NM_000089:c.C3063T;p.G1021G     |            | P100 |      |
| chr7 | 93896468 | 93896468 | G | T | exonic          | nonsynonymous SN\ | COL1A2 | NM_000089:c.G3744T;p.K1248N     | 0.58       | P100 |      |
| chr7 | 98329438 | 98329438 | G | T | exonic          | stopgain SNV      | TRRAP  | NM_003496:c.G448T;p.E150X       | 0.03       | P100 |      |
| chr7 | 98344317 | 98344317 | C | T | exonic          | synonymous SNV    | TRRAP  | NM_003496:c.C1146T;p.L382L      |            | P100 |      |
| chr7 | 98345977 | 98345977 | T | G | exonic;splicing | synonymous SNV    | TRRAP  | NM_003496:c.T1713G;p.G571G      |            | P100 |      |
| chr7 | 98360703 | 98360703 | C | T | exonic          | synonymous SNV    | TRRAP  | NM_003496:c.C2856T;p.S952S      | rs55715417 | P100 |      |
| chr7 | 98413781 | 98413781 | C | A | exonic          | synonymous SNV    | TRRAP  | NM_003496:c.C8322A;p.S2774S     |            | P100 |      |
| chr7 | 1E+08    | 1E+08    | T | G | exonic          | nonsynonymous SN\ | MUC17  | NM_001040105:c.T127G;p.S43A     |            | P100 |      |
| chr7 | 1E+08    | 1E+08    | G | A | exonic          | synonymous SNV    | MUC17  | NM_001040105:c.G5985A;p.T1995T  |            | P100 |      |
| chr7 | 1E+08    | 1E+08    | C | A | exonic          | nonsynonymous SN\ | MUC17  | NM_001040105:c.C6485A;p.P2162H  |            | P100 |      |
| chr7 | 1E+08    | 1E+08    | C | T | exonic          | synonymous SNV    | MUC17  | NM_001040105:c.C12699T;p.V4233V |            | P100 |      |
| chr7 | 1.03E+08 | 1.03E+08 | G | A | exonic          | nonsynonymous SN\ | RELN   | NM_005045:c.C6806T;p.S2269F     | 0.65       | P100 |      |

|       |          |          |   |   |        |                   |         |                                |      |      |
|-------|----------|----------|---|---|--------|-------------------|---------|--------------------------------|------|------|
| chr7  | 1.03E+08 | 1.03E+08 | G | T | exonic | synonymous SNV    | RELN    | NM_005045:c.C5094A:p.T1698T    |      | P100 |
| chr7  | 1.03E+08 | 1.03E+08 | T | C | exonic | nonsynonymous SNV | RELN    | NM_005045:c.A4082G:p.H1361R    | 0.28 | P100 |
| chr7  | 1.03E+08 | 1.03E+08 | G | A | exonic | synonymous SNV    | RELN    | NM_005045:c.C2427T:p.L809L     |      | P100 |
| chr7  | 1.03E+08 | 1.03E+08 | G | T | exonic | nonsynonymous SNV | RELN    | NM_005045:c.C872A:p.S291Y      | 0.04 | P100 |
| chr7  | 1.03E+08 | 1.03E+08 | C | T | exonic | nonsynonymous SNV | RELN    | NM_005045:c.G184A:p.A62T       | 0.25 | P100 |
| chr7  | 1.13E+08 | 1.13E+08 | C | A | exonic | nonsynonymous SNV | PPP1R3A | NM_002711:c.G2505T:p.E835D     | 0    | P100 |
| chr7  | 1.13E+08 | 1.13E+08 | G | T | exonic | nonsynonymous SNV | PPP1R3A | NM_002711:c.C2483A:p.P828H     | 0    | P100 |
| chr7  | 1.13E+08 | 1.13E+08 | C | A | exonic | stopgain SNV      | PPP1R3A | NM_002711:c.G2119T:p.E707X     |      | P100 |
| chr7  | 1.13E+08 | 1.13E+08 | T | C | exonic | nonsynonymous SNV | PPP1R3A | NM_002711:c.A1619G:p.D540G     | 0.08 | P100 |
| chr7  | 1.51E+08 | 1.51E+08 | C | T | exonic | nonsynonymous SNV | MLL3    | NM_170606:c.G12323A:p.R4108Q   | 0.34 | P100 |
| chr7  | 1.51E+08 | 1.51E+08 | G | A | exonic | nonsynonymous SNV | MLL3    | NM_170606:c.C11570T:p.T3857M   | 0.02 | P100 |
| chr7  | 1.51E+08 | 1.51E+08 | G | T | exonic | synonymous SNV    | MLL3    | NM_170606:c.C11262A:p.S3754S   |      | P100 |
| chr7  | 1.52E+08 | 1.52E+08 | G | A | exonic | synonymous SNV    | MLL3    | NM_170606:c.C8928T:p.V2976V    |      | P100 |
| chr7  | 1.52E+08 | 1.52E+08 | A | G | exonic | nonsynonymous SNV | MLL3    | NM_170606:c.T8477C:p.V2826A    | 0.52 | P100 |
| chr7  | 1.52E+08 | 1.52E+08 | C | A | exonic | nonsynonymous SNV | MLL3    | NM_170606:c.G7197T:p.K2399N    | 0.01 | P100 |
| chr7  | 1.52E+08 | 1.52E+08 | T | C | exonic | synonymous SNV    | MLL3    | NM_170606:c.A6774G:p.G2258G    |      | P100 |
| chr7  | 1.52E+08 | 1.52E+08 | G | A | exonic | nonsynonymous SNV | MLL3    | NM_170606:c.C5711T:p.T1904I    | 0    | P100 |
| chr7  | 1.52E+08 | 1.52E+08 | G | T | exonic | nonsynonymous SNV | MLL3    | NM_170606:c.C4333A:p.L1445I    | 0.09 | P100 |
| chr7  | 1.52E+08 | 1.52E+08 | C | A | exonic | nonsynonymous SNV | MLL3    | NM_170606:c.G4040T:p.R1347I    | 0.11 | P100 |
| chr7  | 1.52E+08 | 1.52E+08 | G | T | exonic | nonsynonymous SNV | MLL3    | NM_170606:c.C1859A:p.S620Y     | 0    | P100 |
| chr8  | 41242125 | 41242125 | G | A | exonic | synonymous SNV    | SFRP1   | NM_003012:c.C663T:p.G221G      |      | P100 |
| chr8  | 41910203 | 41910203 | C | A | exonic | nonsynonymous SNV | MYST3   | NM_006766:c.G4692T:p.E1564D    | 0.81 | P100 |
| chr8  | 41910712 | 41910712 | C | T | exonic | nonsynonymous SNV | MYST3   | NM_006766:c.G4183A:p.D1395N    | 0.19 | P100 |
| chr8  | 41914082 | 41914082 | G | A | exonic | synonymous SNV    | MYST3   | NM_006766:c.C3201T:p.I1067I    |      | P100 |
| chr8  | 41914167 | 41914167 | G | T | exonic | nonsynonymous SNV | MYST3   | NM_006766:c.C3116A:p.S1039Y    | 0    | P100 |
| chr8  | 41917855 | 41917855 | C | A | exonic | stopgain SNV      | MYST3   | NM_006766:c.G2701T:p.E901X     | 0.03 | P100 |
| chr8  | 41917966 | 41917966 | G | A | exonic | nonsynonymous SNV | MYST3   | NM_006766:c.C2590T:p.R864W     | 0    | P100 |
| chr8  | 41920548 | 41920548 | C | T | exonic | synonymous SNV    | MYST3   | NM_006766:c.G2103A:p.E701E     |      | P100 |
| chr8  | 41955428 | 41955428 | C | T | exonic | nonsynonymous SNV | MYST3   | NM_006766:c.G932A:p.R311Q      | 0.23 | P100 |
| chr8  | 52920862 | 52920862 | T | G | exonic | nonsynonymous SNV | PCMTD1  | NM_052937:c.A322C:p.N108H      | 0    | P100 |
| chr9  | 32622566 | 32622566 | C | A | exonic | nonsynonymous SNV | TAF1L   | NM_153809:c.G3012T:p.K1004N    | 0    | P100 |
| chr9  | 32623671 | 32623671 | C | T | exonic | nonsynonymous SNV | TAF1L   | NM_153809:c.G1907A:p.R636H     | 0    | P100 |
| chr9  | 90917324 | 90917324 | G | T | exonic | nonsynonymous SNV | SHC3    | NM_016848:c.C512A:p.S171Y      | 0    | P100 |
| chr9  | 96903884 | 96903884 | G | A | exonic | nonsynonymous SNV | FANCC   | NM_000136:c.C1603T:p.R535C     | 0    | P100 |
| chr9  | 1.17E+08 | 1.17E+08 | G | A | exonic | synonymous SNV    | TNC     | NM_002160:c.C6210T:p.Y2070Y    |      | P100 |
| chr9  | 1.17E+08 | 1.17E+08 | G | A | exonic | synonymous SNV    | TNC     | NM_002160:c.C4614T:p.S1538S    |      | P100 |
| chr9  | 1.17E+08 | 1.17E+08 | G | T | exonic | nonsynonymous SNV | TNC     | NM_002160:c.C3061A:p.L1021I    | 0.24 | P100 |
| chr9  | 1.17E+08 | 1.17E+08 | C | A | exonic | nonsynonymous SNV | TNC     | NM_002160:c.G2661T:p.E887D     | 0.1  | P100 |
| chr9  | 1.35E+08 | 1.35E+08 | G | A | exonic | nonsynonymous SNV | GFI1B   | NM_001135031:c.G749A:p.R250H   | 0.03 | P100 |
| chr9  | 1.37E+08 | 1.37E+08 | C | T | exonic | synonymous SNV    | COL5A1  | NM_000093:c.C186T:p.C62C       |      | P100 |
| chr9  | 1.37E+08 | 1.37E+08 | C | T | exonic | synonymous SNV    | COL5A1  | NM_000093:c.C4968T:p.V1656V    |      | P100 |
| chr9  | 1.37E+08 | 1.37E+08 | C | T | exonic | synonymous SNV    | COL5A1  | NM_000093:c.C5406T:p.I1802I    |      | P100 |
| chr10 | 5134350  | 5134350  | G | T | exonic | nonsynonymous SNV | AKR1C3  | NM_003739:c.G628T:p.D210Y      | 0.01 | P100 |
| chr10 | 5237768  | 5237768  | G | A | exonic | nonsynonymous SNV | AKR1C4  | NM_001818:c.G418A:p.D140N      | 0.08 | P100 |
| chr10 | 5244997  | 5244997  | C | A | exonic | nonsynonymous SNV | AKR1C4  | NM_001818:c.C721A:p.L241I      | 0.47 | P100 |
| chr10 | 28236689 | 28236689 | A | C | exonic | nonsynonymous SNV | ARMC4   | NM_018076:c.T2519G:p.V840G     | 0    | P100 |
| chr10 | 28268849 | 28268849 | C | T | exonic | nonsynonymous SNV | ARMC4   | NM_018076:c.G2080A:p.A694T     | 0.01 | P100 |
| chr10 | 28313965 | 28313965 | T | G | exonic | nonsynonymous SNV | ARMC4   | NM_018076:c.A564C:p.K188N      | 0.11 | P100 |
| chr10 | 51254750 | 51254750 | C | A | exonic | nonsynonymous SNV | NCOA4   | NM_001145262:c.C843A:p.F281L   | 0.01 | P100 |
| chr10 | 55239247 | 55239247 | T | G | exonic | stoploss SNV      | PCDH15  | NM_001142770:c.A4619C:p.X1540S |      | P100 |
| chr10 | 55240399 | 55240399 | G | T | exonic | synonymous SNV    | PCDH15  | NM_001142772:c.C4405A:p.R1469R |      | P100 |
| chr10 | 55252060 | 55252060 | A | C | exonic | nonsynonymous SNV | PCDH15  | NM_001142767:c.T5312G:p.L1771R | 0.34 | P100 |
| chr10 | 55252963 | 55252963 | G | A | exonic | nonsynonymous SNV | PCDH15  | NM_001142767:c.C4409T:p.A1470V | 0.01 | P100 |

|       |          |          |   |   |                 |                   |          |                                |                 |
|-------|----------|----------|---|---|-----------------|-------------------|----------|--------------------------------|-----------------|
| chr10 | 55270217 | 55270217 | G | A | exonic          | synonymous SNV    | PCDH15   | NM_001142765:c.C3639T;p.V1213V | P100            |
| chr10 | 55287027 | 55287027 | G | T | exonic          | synonymous SNV    | PCDH15   | NM_001142765:c.C3507A;p.V1169V | P100            |
| chr10 | 55389519 | 55389519 | C | T | exonic          | nonsynonymous SNV | PCDH15   | NM_001142765:c.G2888A;p.R963H  | 0.07 P100       |
| chr10 | 55582916 | 55582916 | A | C | exonic          | synonymous SNV    | PCDH15   | NM_001142767:c.T1623G;p.T541T  | P100            |
| chr10 | 74897403 | 74897403 | C | T | exonic          | nonsynonymous SNV | PPP3CB   | NM_001142353:c.G1022A;p.R341Q  | 0.31 P100       |
| chr10 | 74909163 | 74909163 | T | C | exonic          | synonymous SNV    | PPP3CB   | NM_001142353:c.A204G;p.E68E    | P100            |
| chr10 | 1.06E+08 | 1.06E+08 | G | A | exonic;splicing | nonsynonymous SNV | COL17A1  | NM_000494:c.C4156T;p.R1386C    | 0.02 P100       |
| chr10 | 1.06E+08 | 1.06E+08 | G | A | exonic          | synonymous SNV    | COL17A1  | NM_000494:c.C1002T;p.S334S     | P100            |
| chr10 | 1.06E+08 | 1.06E+08 | G | T | exonic          | stopgain SNV      | COL17A1  | NM_000494:c.C728A;p.S243X      | 0 P100          |
| chr10 | 1.27E+08 | 1.27E+08 | G | A | exonic          | nonsynonymous SNV | CTBP2    | NM_022802:c.C2662T;p.R888C     | 0.01 P100       |
| chr10 | 1.27E+08 | 1.27E+08 | G | A | exonic          | synonymous SNV    | CTBP2    | NM_022802:c.C1923T;p.I641I     | P100            |
| chr10 | 1.29E+08 | 1.29E+08 | C | T | exonic          | synonymous SNV    | DOCK1    | NM_001380:c.C4587T;p.I1529I    | rs61733304 P100 |
| chr11 | 2125431  | 2125431  | C | T | exonic          | nonsynonymous SNV | INS-IGF2 | NM_001042376:c.G590A;p.R197H   | P100            |
| chr11 | 35158404 | 35158404 | T | C | exonic          | nonsynonymous SNV | CD44     | NM_000610:c.T241C;p.F81L       | 0 P100          |
| chr11 | 35199776 | 35199776 | G | T | splicing        |                   | CD44     |                                | P100            |
| chr11 | 76726068 | 76726068 | C | A | exonic          | nonsynonymous SNV | PAK1     | NM_001128620:c.G1165T;p.D389Y  | 0 P100          |
| chr11 | 1.06E+08 | 1.06E+08 | C | A | exonic          | nonsynonymous SNV | GUCY1A2  | NM_000855:c.G1739T;p.R580I     | 0 P100          |
| chr11 | 1.06E+08 | 1.06E+08 | G | T | exonic          | stopgain SNV      | GUCY1A2  | NM_000855:c.C681A;p.C227X      | 0 P100          |
| chr11 | 1.06E+08 | 1.06E+08 | C | A | exonic          | nonsynonymous SNV | GUCY1A2  | NM_000855:c.G632T;p.R211I      | 0.03 P100       |
| chr11 | 1.08E+08 | 1.08E+08 | C | T | exonic          | nonsynonymous SNV | ATM      | NM_000051:c.C94T;p.R32C        | 0.02 P100       |
| chr11 | 1.08E+08 | 1.08E+08 | C | T | exonic          | synonymous SNV    | ATM      | NM_000051:c.C1887T;p.S629S     | P100            |
| chr11 | 1.08E+08 | 1.08E+08 | C | A | exonic          | nonsynonymous SNV | ATM      | NM_000051:c.C3749A;p.S1250Y    | 0.04 P100       |
| chr11 | 1.08E+08 | 1.08E+08 | C | A | exonic          | nonsynonymous SNV | ATM      | NM_000051:c.C4255A;p.L1419I    | 0 P100          |
| chr11 | 1.08E+08 | 1.08E+08 | T | G | exonic          | nonsynonymous SNV | ATM      | NM_000051:c.T4334G;p.F1445C    | 0 P100          |
| chr11 | 1.08E+08 | 1.08E+08 | A | G | exonic          | nonsynonymous SNV | ATM      | NM_000051:c.A5288G;p.Y1763C    | 0 P100          |
| chr11 | 1.08E+08 | 1.08E+08 | T | A | exonic          | nonsynonymous SNV | ATM      | NM_000051:c.T6009A;p.D2003E    | 0.53 P100       |
| chr11 | 1.08E+08 | 1.08E+08 | G | T | exonic          | nonsynonymous SNV | ATM      | NM_000051:c.G6148T;p.D2050Y    | 0 P100          |
| chr11 | 1.08E+08 | 1.08E+08 | C | A | exonic          | synonymous SNV    | ATM      | NM_000051:c.C6864A;p.V2288V    | P100            |
| chr11 | 1.08E+08 | 1.08E+08 | C | A | exonic          | nonsynonymous SNV | ATM      | NM_000051:c.C8517A;p.F2839L    | 0.04 P100       |
| chr11 | 1.24E+08 | 1.24E+08 | G | T | exonic          | synonymous SNV    | OR8B8    | NM_012378:c.C378A;p.I126I      | P100            |
| chr11 | 1.28E+08 | 1.28E+08 | T | G | exonic          | synonymous SNV    | KCNJ1    | NM_000220:c.A594C;p.A198A      | P100            |
| chr11 | 1.34E+08 | 1.34E+08 | G | A | exonic          | nonsynonymous SNV | GLB1L2   | NM_138342:c.G128A;p.R43Q       | P100            |
| chr11 | 1.34E+08 | 1.34E+08 | G | A | exonic          | synonymous SNV    | GLB1L2   | NM_138342:c.G483A;p.R161R      | P100            |
| chr11 | 1.34E+08 | 1.34E+08 | G | A | exonic          | nonsynonymous SNV | GLB1L2   | NM_138342:c.G904A;p.V302M      | P100            |
| chr12 | 5931296  | 5931296  | T | G | exonic          | nonsynonymous SNV | VWF      | NM_000552:c.A8130C;p.K2710N    | 0 P100          |
| chr12 | 5973489  | 5973489  | A | G | exonic          | nonsynonymous SNV | VWF      | NM_000552:c.T6398C;p.V2133A    | 0.54 P100       |
| chr12 | 5975549  | 5975549  | C | T | exonic          | synonymous SNV    | VWF      | NM_000552:c.G5943A;p.E1981E    | P100            |
| chr12 | 6032197  | 6032197  | C | T | exonic          | synonymous SNV    | VWF      | NM_000552:c.G1959A;p.P653P     | P100            |
| chr12 | 25271572 | 25271572 | A | G | exonic          | synonymous SNV    | KRAS     | NM_004985:c.T153C;p.C51C       | P100            |
| chr12 | 25271580 | 25271580 | C | A | exonic          | stopgain SNV      | KRAS     | NM_004985:c.G145T;p.E49X       | 0.01 P100       |
| chr12 | 46787502 | 46787502 | A | G | exonic          | nonsynonymous SNV | PFKM     | NM_001166686:c.A79G;p.T27A     | 0 P100          |
| chr12 | 47457258 | 47457258 | C | A | exonic          | nonsynonymous SNV | ADCY6    | NM_015270:c.G1272T;p.K424N     | 0 P100          |
| chr12 | 94705044 | 94705044 | A | C | exonic          | nonsynonymous SNV | NTN4     | NM_021229:c.T389G;p.L130R      | 0 P100          |
| chr12 | 1.08E+08 | 1.08E+08 | G | T | exonic          | nonsynonymous SNV | ACACB    | NM_001093:c.G385T;p.D129Y      | 0 P100          |
| chr12 | 1.08E+08 | 1.08E+08 | G | A | exonic          | nonsynonymous SNV | ACACB    | NM_001093:c.G2552A;p.R851Q     | P100            |
| chr12 | 1.08E+08 | 1.08E+08 | A | C | exonic          | nonsynonymous SNV | ACACB    | NM_001093:c.A3041C;p.E1014A    | P100            |
| chr12 | 1.08E+08 | 1.08E+08 | G | T | exonic          | nonsynonymous SNV | ACACB    | NM_001093:c.G4441T;p.D1481Y    | 0.01 P100       |
| chr12 | 1.08E+08 | 1.08E+08 | G | T | exonic          | nonsynonymous SNV | ACACB    | NM_001093:c.G4456T;p.D1486Y    | 0 P100          |
| chr12 | 1.08E+08 | 1.08E+08 | T | G | exonic          | nonsynonymous SNV | ACACB    | NM_001093:c.T6521G;p.F2174C    | P100            |
| chr12 | 1.28E+08 | 1.28E+08 | C | T | exonic          | nonsynonymous SNV | TMEM132D | NM_133448:c.G3154A;p.A1052T    | 0.9 P100        |
| chr12 | 1.28E+08 | 1.28E+08 | G | T | exonic          | nonsynonymous SNV | TMEM132D | NM_133448:c.C2537A;p.S846Y     | 1 P100          |
| chr12 | 1.28E+08 | 1.28E+08 | C | A | exonic          | nonsynonymous SNV | TMEM132D | NM_133448:c.G2349T;p.K783N     | 0.12 P100       |
| chr12 | 1.28E+08 | 1.28E+08 | G | A | exonic          | nonsynonymous SNV | TMEM132D | NM_133448:c.C1421T;p.S474L     | 0 P100          |

|       |          |          |   |   |        |                            |                                |      |      |
|-------|----------|----------|---|---|--------|----------------------------|--------------------------------|------|------|
| chr12 | 1.29E+08 | 1.29E+08 | G | A | exonic | nonsynonymous SN\ TMEM132D | NM_133448:c.C853T;p.R285C      | 0.09 | P100 |
| chr12 | 1.31E+08 | 1.31E+08 | G | T | exonic | synonymous SNV EP400       | NM_015409:c.G6552T;p.L2184L    |      | P100 |
| chr12 | 1.31E+08 | 1.31E+08 | G | A | exonic | nonsynonymous SN\ EP400    | NM_015409:c.G6931A;p.A2311T    | 0.11 | P100 |
| chr12 | 1.31E+08 | 1.31E+08 | G | A | exonic | synonymous SNV EP400       | NM_015409:c.G8580A;p.A2860A    |      | P100 |
| chr13 | 23927162 | 23927162 | G | A | exonic | synonymous SNV PARP4       | NM_006437:c.C2751T;p.F917F     |      | P100 |
| chr13 | 23949853 | 23949853 | A | C | exonic | nonsynonymous SN\ PARP4    | NM_006437:c.T1775G;p.F592C     | 0.18 | P100 |
| chr13 | 23973917 | 23973917 | G | T | exonic | nonsynonymous SN\ PARP4    | NM_006437:c.C188A;p.S63Y       | 0.01 | P100 |
| chr13 | 66699290 | 66699290 | G | T | exonic | nonsynonymous SN\ PCDH9    | NM_020403:c.C1284A;p.D428E     | 0    | P100 |
| chr13 | 66699644 | 66699644 | C | T | exonic | synonymous SNV PCDH9       | NM_020403:c.G930A;p.G310G      |      | P100 |
| chr13 | 66699785 | 66699785 | C | A | exonic | nonsynonymous SN\ PCDH9    | NM_020403:c.G789T;p.E263D      | 0    | P100 |
| chr13 | 93890217 | 93890217 | C | T | exonic | nonsynonymous SN\ DCT      | NM_001922:c.G1496A;p.R499Q     | 0.37 | P100 |
| chr13 | 93890226 | 93890226 | C | A | exonic | nonsynonymous SN\ DCT      | NM_001922:c.G1487T;p.R496I     | 0    | P100 |
| chr13 | 93912332 | 93912332 | G | A | exonic | stopgain SNV DCT           | NM_001129889:c.C976T;p.R326X   | 0.49 | P100 |
| chr13 | 93915946 | 93915946 | C | T | exonic | nonsynonymous SN\ DCT      | NM_001129889:c.G805A;p.D269N   | 0.15 | P100 |
| chr14 | 22933228 | 22933228 | G | A | exonic | synonymous SNV MYH6        | NM_002471:c.C2574T;p.F858F     |      | P100 |
| chr14 | 31629861 | 31629861 | A | C | exonic | nonsynonymous SN\ ARHGAP5  | NM_001030055:c.A235C;p.I79L    | 0.18 | P100 |
| chr14 | 31631463 | 31631463 | G | T | exonic | stopgain SNV ARHGAP5       | NM_001030055:c.G1837T;p.E613X  | 0.02 | P100 |
| chr14 | 31691401 | 31691401 | G | A | exonic | nonsynonymous SN\ ARHGAP5  | NM_001030055:c.G4097A;p.R1366H | 0.01 | P100 |
| chr14 | 49681979 | 49681979 | G | A | exonic | nonsynonymous SN\ SOS2     | NM_006939:c.C2470T;p.R824C     | 0.01 | P100 |
| chr14 | 49686497 | 49686497 | A | C | exonic | nonsynonymous SN\ SOS2     | NM_006939:c.T2363G;p.L788R     | 0    | P100 |
| chr14 | 49696102 | 49696102 | C | T | exonic | nonsynonymous SN\ SOS2     | NM_006939:c.G1649A;p.R550Q     | 0    | P100 |
| chr14 | 49710990 | 49710990 | G | A | exonic | nonsynonymous SN\ SOS2     | NM_006939:c.C1000T;p.R334C     | 0    | P100 |
| chr15 | 26042886 | 26042886 | G | T | exonic | nonsynonymous SN\ HERC2    | NM_004667:c.C13080A;p.F4360L   | 1    | P100 |
| chr15 | 26065034 | 26065034 | C | T | exonic | nonsynonymous SN\ HERC2    | NM_004667:c.G10952A;p.R3651H   | 0    | P100 |
| chr15 | 26109968 | 26109968 | C | A | exonic | nonsynonymous SN\ HERC2    | NM_004667:c.G8469T;p.E2823D    | 0.02 | P100 |
| chr15 | 26175809 | 26175809 | C | T | exonic | nonsynonymous SN\ HERC2    | NM_004667:c.G2510A;p.R837Q     | 0    | P100 |
| chr15 | 64516252 | 64516252 | G | A | exonic | nonsynonymous SN\ MAP2K1   | NM_002755:c.G406A;p.D136N      | 0.17 | P100 |
| chr15 | 67010072 | 67010072 | C | T | exonic | nonsynonymous SN\ SPESP1   | NM_145658:c.C26T;p.A9V         | 0    | P100 |
| chr15 | 67122077 | 67122077 | C | T | exonic | nonsynonymous SN\ NOX5     | NM_001184779:c.C1441T;p.R481W  |      | P100 |
| chr16 | 3956238  | 3956238  | C | T | exonic | nonsynonymous SN\ ADCY9    | NM_001116:c.G3601A;p.G1201S    | 0    | P100 |
| chr16 | 4105047  | 4105047  | T | G | exonic | nonsynonymous SN\ ADCY9    | NM_001116:c.A398C;p.Y133S      | 0.01 | P100 |
| chr16 | 23131690 | 23131690 | G | A | exonic | nonsynonymous SN\ SCNN1G   | NM_001039:c.G1405A;p.A469T     | 0.02 | P100 |
| chr16 | 30031008 | 30031008 | T | G | exonic | nonsynonymous SN\ GDPD3    | NM_024307:c.A519C;p.E173D      |      | P100 |
| chr16 | 30032230 | 30032230 | C | T | exonic | nonsynonymous SN\ GDPD3    | NM_024307:c.G71A;p.R24H        |      | P100 |
| chr16 | 54074453 | 54074453 | G | T | exonic | nonsynonymous SN\ MMP2     | NM_001127891:c.G135T;p.E45D    | 0.31 | P100 |
| chr16 | 54089838 | 54089838 | C | A | exonic | synonymous SNV MMP2        | NM_001127891:c.C1596A;p.I532I  |      | P100 |
| chr16 | 60612716 | 60612716 | C | T | exonic | synonymous SNV CDH8        | NM_001796:c.G93A;p.P31P        |      | P100 |
| chr16 | 73477700 | 73477700 | G | A | exonic | stopgain SNV WDR59         | NM_030581:c.C2515T;p.R839X     |      | P100 |
| chr17 | 1512096  | 1512096  | C | A | exonic | nonsynonymous SN\ PRPF8    | NM_006445:c.G3876T;p.E1292D    | 0    | P100 |
| chr17 | 1524504  | 1524504  | C | T | exonic | nonsynonymous SN\ PRPF8    | NM_006445:c.G3281A;p.R1094H    | 0.01 | P100 |
| chr17 | 1524710  | 1524710  | C | T | exonic | synonymous SNV PRPF8       | NM_006445:c.G3075A;p.T1025T    |      | P100 |
| chr17 | 1525352  | 1525352  | C | T | exonic | synonymous SNV PRPF8       | NM_006445:c.G2904A;p.T968T     |      | P100 |
| chr17 | 3564914  | 3564914  | C | A | exonic | nonsynonymous SN\ ITGAE    | NM_002208:c.G3516T;p.E1172D    | 0.8  | P100 |
| chr17 | 3600435  | 3600435  | C | T | exonic | nonsynonymous SN\ ITGAE    | NM_002208:c.G1984A;p.D662N     | 0    | P100 |
| chr17 | 3607077  | 3607077  | G | A | exonic | nonsynonymous SN\ ITGAE    | NM_002208:c.C1121T;p.A374V     | 0    | P100 |
| chr17 | 3613953  | 3613953  | C | T | exonic | nonsynonymous SN\ ITGAE    | NM_002208:c.G206A;p.R69Q       | 0.25 | P100 |
| chr17 | 7517269  | 7517269  | G | A | exonic | nonsynonymous SN\ TP53     | NM_001126117:c.C638T;p.S213L   |      | P100 |
| chr17 | 10288851 | 10288851 | C | T | exonic | nonsynonymous SN\ MYH4     | NM_017533:c.G5557A;p.E1853K    | 0.01 | P100 |
| chr17 | 10292150 | 10292150 | C | T | exonic | nonsynonymous SN\ MYH4     | NM_017533:c.G4675A;p.E1559K    | 0    | P100 |
| chr17 | 10292714 | 10292714 | C | T | exonic | nonsynonymous SN\ MYH4     | NM_017533:c.G4477A;p.E1493K    | 0    | P100 |
| chr17 | 10297921 | 10297921 | C | A | exonic | nonsynonymous SN\ MYH4     | NM_017533:c.G2698T;p.D900Y     | 0    | P100 |
| chr17 | 10299067 | 10299067 | T | G | exonic | nonsynonymous SN\ MYH4     | NM_017533:c.A2351C;p.K784T     | 0.01 | P100 |
| chr17 | 10310599 | 10310599 | C | T | exonic | synonymous SNV MYH4        | NM_017533:c.G189A;p.K63K       |      | P100 |

|       |          |          |   |   |                 |                           |                                 |      |      |
|-------|----------|----------|---|---|-----------------|---------------------------|---------------------------------|------|------|
| chr17 | 10310683 | 10310683 | C | A | exonic          | nonsynonymous SN\ MYH4    | NM_017533:c.G105T:p.K35N        | 0    | P100 |
| chr17 | 10338648 | 10338648 | C | T | exonic          | nonsynonymous SN\ MYH1    | NM_005963:c.G5534A:p.R1845H     | 0.02 | P100 |
| chr17 | 10367631 | 10367631 | C | A | exonic          | nonsynonymous SN\ MYH2    | NM_001100112:c.G5379T:p.E1793D  | 0.04 | P100 |
| chr17 | 10367663 | 10367663 | C | T | exonic          | nonsynonymous SN\ MYH2    | NM_001100112:c.G5347A:p.A1783T  | 0.2  | P100 |
| chr17 | 10381751 | 10381751 | C | T | exonic          | nonsynonymous SN\ MYH2    | NM_001100112:c.G1543A:p.D515N   | 0    | P100 |
| chr17 | 10383256 | 10383256 | C | A | exonic          | nonsynonymous SN\ MYH2    | NM_001100112:c.G1407T:p.E469D   | 0    | P100 |
| chr17 | 26557505 | 26557505 | G | A | exonic          | nonsynonymous SN\ NF1     | NM_000267:c.G1382A:p.R461Q      | 0    | P100 |
| chr17 | 26677211 | 26677211 | C | T | exonic          | nonsynonymous SN\ NF1     | NM_000267:c.C5020T:p.R1674W     | 0    | P100 |
| chr17 | 26681494 | 26681494 | C | T | exonic          | synonymous SNV NF1        | NM_000267:c.C5601T:p.I1867I     |      | P100 |
| chr17 | 38306531 | 38306531 | G | T | exonic          | nonsynonymous SN\ G6PC    | NM_000151:c.G112T:p.D38Y        | 0    | P100 |
| chr17 | 38316841 | 38316841 | T | C | exonic          | nonsynonymous SN\ G6PC    | NM_000151:c.T946C:p.S316P       | 0.02 | P100 |
| chr17 | 38498011 | 38498011 | A | G | exonic          | synonymous SNV BRCA1      | NM_007297:c.T2922C:p.S974S      |      | P100 |
| chr17 | 42571242 | 42571242 | G | T | exonic          | nonsynonymous SN\ CDC27   | NM_001114091:c.C1584A:p.F528L   | 0    | P100 |
| chr17 | 43103152 | 43103152 | C | A | exonic          | nonsynonymous SN\ KPNB1   | NM_002265:c.C1502A:p.S501Y      | 0.06 | P100 |
| chr17 | 51758580 | 51758580 | G | T | splicing        | ANKFN1                    |                                 |      | P100 |
| chr17 | 51783270 | 51783270 | C | T | exonic          | synonymous SNV ANKFN1     | NM_153228:c.C342T:p.F114F       |      | P100 |
| chr17 | 51913069 | 51913069 | C | A | exonic          | nonsynonymous SN\ ANKFN1  | NM_153228:c.C1991A:p.S664Y      | 0.05 | P100 |
| chr17 | 71237082 | 71237082 | C | T | exonic          | synonymous SNV ITGB4      | NM_001005619:c.C708T:p.F236F    |      | P100 |
| chr17 | 71258778 | 71258778 | G | T | exonic          | nonsynonymous SN\ ITGB4   | NM_001005619:c.G3784T:p.D1262Y  | 0    | P100 |
| chr17 | 75933511 | 75933511 | G | T | exonic          | nonsynonymous SN\ RNF213  | NM_020914:c.G6928T:p.D2310Y     | 0    | P100 |
| chr17 | 75973460 | 75973460 | C | A | exonic          | nonsynonymous SN\ RNF213  | NM_020914:c.C14496A:p.F4832L    |      | P100 |
| chr18 | 6932125  | 6932125  | C | T | exonic          | nonsynonymous SN\ LAMA1   | NM_005559:c.G9181A:p.E3061K     | 0.41 | P100 |
| chr18 | 6954767  | 6954767  | T | G | exonic          | nonsynonymous SN\ LAMA1   | NM_005559:c.A7231C:p.N2411H     | 0.08 | P100 |
| chr18 | 6955414  | 6955414  | G | A | exonic          | synonymous SNV LAMA1      | NM_005559:c.C7068T:p.I2356I     |      | P100 |
| chr18 | 6967821  | 6967821  | G | A | exonic          | nonsynonymous SN\ LAMA1   | NM_005559:c.C6250T:p.R2084W     | 0.01 | P100 |
| chr18 | 7032155  | 7032155  | T | C | exonic          | nonsynonymous SN\ LAMA1   | NM_005559:c.A1250G:p.D417G      | 0.52 | P100 |
| chr18 | 7036283  | 7036283  | A | C | exonic          | synonymous SNV LAMA1      | NM_005559:c.T852G:p.T284T       |      | P100 |
| chr18 | 7878178  | 7878178  | G | T | exonic          | stopgain SNV PTPRM        | NM_001105244:c.G271T:p.E91X     | 0.01 | P100 |
| chr18 | 7939192  | 7939192  | G | A | exonic          | nonsynonymous SN\ PTPRM   | NM_001105244:c.G677A:p.R226Q    | 0.38 | P100 |
| chr18 | 8059731  | 8059731  | C | T | exonic          | nonsynonymous SN\ PTPRM   | NM_001105244:c.C1180T:p.R394W   | 0    | P100 |
| chr18 | 8059748  | 8059748  | C | T | exonic          | synonymous SNV PTPRM      | NM_001105244:c.C1197T:p.R399R   |      | P100 |
| chr18 | 8103530  | 8103530  | A | C | exonic          | nonsynonymous SN\ PTPRM   | NM_001105244:c.A1903C:p.K635Q   | 0.01 | P100 |
| chr18 | 8286371  | 8286371  | C | T | exonic          | synonymous SNV PTPRM      | NM_002845:c.C2721T:p.F907F      |      | P100 |
| chr18 | 8366523  | 8366523  | G | T | exonic          | nonsynonymous SN\ PTPRM   | NM_002845:c.G3351T:p.R1117S     | 0.53 | P100 |
| chr18 | 46444771 | 46444771 | G | A | exonic          | nonsynonymous SN\ MAPK4   | NM_002747:c.G445A:p.D149N       |      | P100 |
| chr18 | 46847555 | 46847555 | G | T | exonic;splicing | nonsynonymous SN\ SMAD4   | NM_005359:c.G1308T:p.K436N      | 0    | P100 |
| chr18 | 48705715 | 48705715 | C | T | exonic          | nonsynonymous SN\ DCC     | NM_005215:c.C962T:p.A321V       | 0.2  | P100 |
| chr18 | 49231006 | 49231006 | G | A | exonic          | nonsynonymous SN\ DCC     | NM_005215:c.G3368A:p.R1123Q     | 0    | P100 |
| chr18 | 61698694 | 61698694 | G | T | exonic          | stopgain SNV CDH7         | NM_004361:c.G1942T:p.E648X      | 0.02 | P100 |
| chr19 | 16374173 | 16374173 | C | T | exonic          | nonsynonymous SN\ EPS15L1 | NM_021235:c.G1750A:p.E584K      | 0.3  | P100 |
| chr19 | 16414014 | 16414014 | G | A | exonic          | nonsynonymous SN\ EPS15L1 | NM_021235:c.C50T:p.S17L         | 0.12 | P100 |
| chr19 | 43628990 | 43628990 | G | T | exonic          | stopgain SNV RYR1         | NM_000540:c.G670T:p.G224X       | 0    | P100 |
| chr19 | 43634293 | 43634293 | G | A | exonic          | nonsynonymous SN\ RYR1    | NM_000540:c.G1172A:p.R391H      | 0.01 | P100 |
| chr19 | 43638198 | 43638198 | C | A | exonic          | synonymous SNV RYR1       | NM_000540:c.C1758A:p.I586I      |      | P100 |
| chr19 | 43660275 | 43660275 | A | G | exonic          | nonsynonymous SN\ RYR1    | NM_000540:c.A4379G:p.D1460G     | 0.24 | P100 |
| chr19 | 43668445 | 43668445 | G | A | exonic          | synonymous SNV RYR1       | NM_000540:c.G5310A:p.S1770S     |      | P100 |
| chr19 | 43673125 | 43673125 | G | T | exonic          | nonsynonymous SN\ RYR1    | NM_000540:c.G6040T:p.D2014Y     | 0.06 | P100 |
| chr19 | 43697522 | 43697522 | C | A | exonic          | synonymous SNV RYR1       | NM_000540:c.C9489A:p.V3163V     |      | P100 |
| chr19 | 43701858 | 43701858 | C | T | exonic          | nonsynonymous SN\ RYR1    | NM_000540:c.C10183T:p.R3395W    |      | P100 |
| chr19 | 43715012 | 43715012 | C | A | exonic          | synonymous SNV RYR1       | NM_001042723:c.C11169A:p.I3723I |      | P100 |
| chr19 | 43717261 | 43717261 | C | T | exonic          | nonsynonymous SN\ RYR1    | NM_001042723:c.C11306T:p.A3769V |      | P100 |
| chr19 | 43762498 | 43762498 | C | T | exonic          | nonsynonymous SN\ RYR1    | NM_001042723:c.C14386T:p.L4796F | 0.05 | P100 |
| chr19 | 47166267 | 47166267 | C | T | exonic          | nonsynonymous SN\ ATP1A3  | NM_152296:c.G2452A:p.E818K      | 0    | P100 |

|       |          |          |   |   |                 |                   |         |                                |             |           |
|-------|----------|----------|---|---|-----------------|-------------------|---------|--------------------------------|-------------|-----------|
| chr19 | 47785489 | 47785489 | C | T | exonic          | synonymous SNV    | CEACAM8 | NM_001816:c.G663A:p.A221A      |             | P100      |
| chr19 | 47925119 | 47925119 | G | T | exonic          | synonymous SNV    | PSG3    | NM_021016:c.C1239A:p.V413V     |             | P100      |
| chr19 | 47934982 | 47934982 | A | G | exonic          | nonsynonymous SNV | PSG3    | NM_021016:c.T164C:p.V55A       |             | 0.12 P100 |
| chr19 | 48267869 | 48267869 | C | T | exonic          | nonsynonymous SNV | PSG2    | NM_031246:c.G787A:p.A263T      | rs112235686 | 0.24 P100 |
| chr19 | 60040927 | 60040927 | A | G | exonic          | nonsynonymous SNV | KIR2DS4 | NM_012314:c.A155G:p.D52G       |             | 0.01 P100 |
| chr19 | 61105228 | 61105228 | T | C | exonic          | nonsynonymous SNV | NLRP13  | NM_176810:c.A2774G:p.N925S     |             | 0.06 P100 |
| chr19 | 61115200 | 61115200 | C | A | exonic          | stopgain SNV      | NLRP13  | NM_176810:c.G1795T:p.E599X     |             | 0.25 P100 |
| chr19 | 61116312 | 61116312 | G | A | exonic          | nonsynonymous SNV | NLRP13  | NM_176810:c.C683T:p.A228V      |             | 0.11 P100 |
| chr20 | 23369045 | 23369045 | C | A | exonic          | nonsynonymous SNV | CSTL1   | NM_138283:c.C141A:p.F47L       |             | 0 P100    |
| chr20 | 44103530 | 44103530 | G | A | exonic          | nonsynonymous SNV | SLC12A5 | NM_001134771:c.G1079A:p.R360Q  |             | 0.59 P100 |
| chr20 | 57995941 | 57995941 | C | T | exonic          | synonymous SNV    | CDH26   | NM_177980:c.C876T:p.G292G      |             | P100      |
| chr20 | 57996065 | 57996065 | G | A | exonic          | nonsynonymous SNV | CDH26   | NM_177980:c.G1000A:p.E334K     |             | 0.01 P100 |
| chr21 | 45700291 | 45700291 | C | T | exonic          | nonsynonymous SNV | COL18A1 | NM_030582:c.C419T:p.A140V      |             | 0.1 P100  |
| chr21 | 45735638 | 45735638 | C | A | exonic          | synonymous SNV    | COL18A1 | NM_030582:c.C2679A:p.V893V     |             | P100      |
| chr21 | 45749703 | 45749703 | T | C | exonic          | nonsynonymous SNV | COL18A1 | NM_030582:c.T3548C:p.I1183T    |             | 0.02 P100 |
| chr22 | 21795535 | 21795535 | G | A | exonic          | nonsynonymous SNV | GNAZ    | NM_002073:c.G985A:p.D329N      |             | 0 P100    |
| chr22 | 39843302 | 39843302 | C | A | exonic          | nonsynonymous SNV | EP300   | NM_001429:c.C260A:p.S87Y       |             | 0.03 P100 |
| chr22 | 39867046 | 39867046 | G | T | exonic          | stopgain SNV      | EP300   | NM_001429:c.G1927T:p.E643X     |             | 0 P100    |
| chr22 | 39883211 | 39883211 | C | T | exonic          | synonymous SNV    | EP300   | NM_001429:c.C3354T:p.V1118V    | rs11704815  | P100      |
| chrX  | 18876786 | 18876786 | G | A | exonic          | synonymous SNV    | PHKA2   | NM_000292:c.C534T:p.V178V      |             | P100      |
| chrX  | 19289393 | 19289393 | C | A | exonic          | nonsynonymous SNV | MAP3K15 | NM_001001671:c.G3842T:p.R1281I |             | 1 P100    |
| chrX  | 19320463 | 19320463 | C | T | exonic          | synonymous SNV    | MAP3K15 | NM_001001671:c.G2244A:p.P748P  |             | P100      |
| chrX  | 19385048 | 19385048 | G | A | exonic          | nonsynonymous SNV | MAP3K15 | NM_001001671:c.C899T:p.A300V   |             | P100      |
| chrX  | 31406229 | 31406229 | C | T | exonic          | nonsynonymous SNV | DMD     | NM_004014:c.G665A:p.R222H      | rs72466567  | 0.22 P100 |
| chrX  | 32276449 | 32276449 | C | T | exonic          | nonsynonymous SNV | DMD     | NM_004011:c.G1420A:p.D474N     |             | 0.31 P100 |
| chrX  | 32293199 | 32293199 | C | A | exonic          | synonymous SNV    | DMD     | NM_004011:c.G861T:p.L287L      |             | P100      |
| chrX  | 32391534 | 32391534 | C | T | exonic          | synonymous SNV    | DMD     | NM_004007:c.G3006A:p.S1002S    |             | P100      |
| chrX  | 70520695 | 70520695 | G | T | exonic          | nonsynonymous SNV | TAF1    | NM_004606:c.G2166T:p.K722N     |             | 0.03 P100 |
| chrX  | 70525340 | 70525340 | A | C | exonic          | nonsynonymous SNV | TAF1    | NM_004606:c.A2657C:p.K886T     |             | 0 P100    |
| chrX  | 70559765 | 70559765 | C | A | exonic          | nonsynonymous SNV | TAF1    | NM_004606:c.C4586A:p.S1529Y    |             | 0 P100    |
| chrX  | 1E+08    | 1E+08    | C | T | exonic          | nonsynonymous SNV | BTK     | NM_000061:c.G1475A:p.R492H     |             | 0.26 P100 |
| chrX  | 1.01E+08 | 1.01E+08 | G | A | exonic          | nonsynonymous SNV | BTK     | NM_000061:c.C367T:p.R123W      |             | 0 P100    |
| chrX  | 1.14E+08 | 1.14E+08 | T | G | exonic          | stopgain SNV      | HTR2C   | NM_000868:c.T275G:p.L92X       |             | 0 P100    |
| chrX  | 1.38E+08 | 1.38E+08 | C | T | exonic          | nonsynonymous SNV | FGF13   | NM_004114:c.G115A:p.D39N       |             | 0.24 P100 |
| chrX  | 1.54E+08 | 1.54E+08 | C | T | exonic          | nonsynonymous SNV | F8      | NM_000132:c.G6404A:p.R2135Q    |             | 0.25 P100 |
| chrX  | 1.54E+08 | 1.54E+08 | G | A | exonic          | stopgain SNV      | F8      | NM_000132:c.C5878T:p.R1960X    |             | P100      |
| chrX  | 1.54E+08 | 1.54E+08 | G | A | exonic          | nonsynonymous SNV | F8      | NM_000132:c.C4580T:p.T1527M    |             | 0.01 P100 |
| chrX  | 1.54E+08 | 1.54E+08 | G | T | exonic          | nonsynonymous SNV | F8      | NM_000132:c.C4388A:p.S1463Y    |             | 0 P100    |
| chrX  | 1.54E+08 | 1.54E+08 | G | A | exonic          | nonsynonymous SNV | F8      | NM_000132:c.C784T:p.P262S      |             | 0 P100    |
| chrX  | 1.54E+08 | 1.54E+08 | G | T | exonic          | nonsynonymous SNV | F8      | NM_000132:c.C268A:p.L90M       |             | 0.02 P100 |
| chr2  | 2.38E+08 | 2.38E+08 | C | T | exonic          | nonsynonymous SNV | COL6A3  | NM_057166:c.G2287A:p.A763T     |             | P97       |
| chr3  | 58069294 | 58069294 | G | C | exonic          | nonsynonymous SNV | FLNB    | NM_001164317:c.G2011C:p.D671H  |             | 0 P97     |
| chr5  | 1.12E+08 | 1.12E+08 | G | A | splicing        |                   | APC     |                                |             | P97       |
| chr5  | 1.4E+08  | 1.4E+08  | C | T | exonic          | synonymous SNV    | PCDHA12 | NM_018903:c.C1542T:p.S514S     |             | P97       |
| chr10 | 55239084 | 55239084 | C | T | exonic          | nonsynonymous SNV | PCDH15  | NM_001142769:c.G4747A:p.D1583N |             | P97       |
| chr12 | 25289551 | 25289551 | C | T | exonic          | nonsynonymous SNV | KRAS    | NM_004985:c.G35A:p.G12D        |             | 0 P97     |
| chr17 | 7517849  | 7517849  | C | T | exonic          | nonsynonymous SNV | TP53    | NM_001126115:c.G418A:p.V140M   |             | 0 P97     |
| chr3  | 1.53E+08 | 1.53E+08 | C | T | exonic          | nonsynonymous SNV | IGSF10  | NM_178822:c.G1477A:p.V493I     |             | 0.1 P98   |
| chr5  | 1.12E+08 | 1.12E+08 | G | A | exonic          | nonsynonymous SNV | APC     | NM_001127511:c.G799A:p.D267N   |             | 0.02 P98  |
| chr5  | 1.12E+08 | 1.12E+08 | C | T | exonic          | stopgain SNV      | APC     | NM_001127511:c.C3853T:p.Q1285X |             | 0.35 P98  |
| chr6  | 1.53E+08 | 1.53E+08 | C | A | exonic          | stopgain SNV      | SYNE1   | NM_033071:c.G8047T:p.E2683X    |             | 0.02 P98  |
| chr7  | 1.03E+08 | 1.03E+08 | C | G | exonic          | nonsynonymous SNV | RELN    | NM_005045:c.G2147C:p.G716A     |             | 0.59 P98  |
| chr11 | 1.08E+08 | 1.08E+08 | C | T | exonic;splicing | nonsynonymous SNV | ATM     | NM_000051:c.C2921T:p.S974F     |             | 0.16 P98  |

|       |          |          |   |   |                 |                   |          |                                         |           |
|-------|----------|----------|---|---|-----------------|-------------------|----------|-----------------------------------------|-----------|
| chr13 | 30131418 | 30131418 | C | T | exonic          | synonymous SNV    | USPL1    | NM_005800:c.C3204T;p.S1068S             | P98       |
| chr17 | 7518263  | 7518263  | C | T | exonic          | nonsynonymous SNV | TP53     | NM_001126115:c.G347A;p.R116Q rs11540652 | 0.02 P98  |
| chr19 | 48271428 | 48271428 | C | A | exonic          | nonsynonymous SNV | PSG2     | NM_031246:c.G627T;p.K209N               | 0 P98     |
| chr1  | 1.58E+08 | 1.58E+08 | C | T | exonic          | synonymous SNV    | ATP1A2   | NM_000702:c.C1815T;p.S605S              | P93       |
| chr1  | 1.58E+08 | 1.58E+08 | C | T | exonic          | nonsynonymous SNV | ATP1A2   | NM_000702:c.C3019T;p.R1007W             | 0 P93     |
| chr5  | 1.12E+08 | 1.12E+08 | C | T | exonic;splicing | stopgain SNV      | APC      | NM_000038:c.C646T;p.R216X rs62619935    | 0.19 P93  |
| chr17 | 7517846  | 7517846  | G | A | exonic          | nonsynonymous SNV | TP53     | NM_001126115:c.C421T;p.R141C            | 0 P93     |
| chr5  | 1.12E+08 | 1.12E+08 | G | T | exonic          | stopgain SNV      | APC      | NM_001127511:c.G3880T;p.G1294X          | 0.37 P88  |
| chr17 | 7517846  | 7517846  | G | A | exonic          | nonsynonymous SNV | TP53     | NM_001126115:c.C421T;p.R141C            | 0 P88     |
| chr5  | 1.41E+08 | 1.41E+08 | C | T | exonic          | synonymous SNV    | PCDHB7   | NM_018940:c.C714T;p.N238N               | P91       |
| chr5  | 1.69E+08 | 1.69E+08 | G | A | exonic          | nonsynonymous SNV | DOCK2    | NM_004946:c.G1763A;p.S588N              | 0.15 P91  |
| chr6  | 1.69E+08 | 1.69E+08 | C | T | exonic          | nonsynonymous SNV | THBS2    | NM_003247:c.G2719A;p.D907N              | 0.31 P91  |
| chr12 | 25269829 | 25269829 | C | T | exonic          | nonsynonymous SNV | KRAS     | NM_004985:c.G436A;p.A146T               | 0.01 P91  |
| chr17 | 7519186  | 7519186  | C | A | exonic          | nonsynonymous SNV | TP53     | NM_001126115:c.G73T;p.V25F              | 0 P91     |
| chr4  | 1.56E+08 | 1.56E+08 | G | A | exonic          | synonymous SNV    | DCHS2    | NM_017639:c.C162T;p.P54P                | P89       |
| chr5  | 1.12E+08 | 1.12E+08 | C | T | exonic          | stopgain SNV      | APC      | NM_001127511:c.C4231T;p.Q1411X          | 0 P89     |
| chr5  | 1.4E+08  | 1.4E+08  | G | A | exonic          | nonsynonymous SNV | PCDHB2   | NM_018936:c.G1273A;p.V425I              | 0.09 P89  |
| chr10 | 75343748 | 75343748 | T | A | exonic          | nonsynonymous SNV | PLAU     | NM_001145031:c.T634A;p.Y212N            | 0 P89     |
| chr12 | 1.28E+08 | 1.28E+08 | G | A | exonic          | nonsynonymous SNV | TMEM132D | NM_133448:c.C2162T;p.T721M              | 0.08 P89  |
| chr12 | 1.28E+08 | 1.28E+08 | C | T | exonic          | nonsynonymous SNV | TMEM132D | NM_133448:c.G1684A;p.E562K              | 0.02 P89  |
| chr17 | 7518334  | 7518334  | C | G | splicing        |                   | TP53     |                                         | P89       |
| chr1  | 70259355 | 70259355 | A | T | exonic          | nonsynonymous SNV | LRRC7    | NM_020794:c.A1386T;p.E462D              | 0.33 P117 |
| chr1  | 2.14E+08 | 2.14E+08 | G | A | exonic          | synonymous SNV    | USH2A    | NM_206933:c.C13098T;p.A4366A            | P117      |
| chr2  | 1.7E+08  | 1.7E+08  | G | A | exonic          | synonymous SNV    | LRP2     | NM_004525:c.C11394T;p.C3798C            | P117      |
| chr3  | 41241128 | 41241128 | A | G | exonic          | nonsynonymous SNV | CTNNB1   | NM_001098209:c.A121G;p.T41A             | 0.01 P117 |
| chr3  | 1.42E+08 | 1.42E+08 | C | T | exonic          | synonymous SNV    | CLSTN2   | NM_022131:c.C2748T;p.S916S              | P117      |
| chr4  | 1.27E+08 | 1.27E+08 | T | C | exonic          | synonymous SNV    | FAT4     | NM_024582:c.T5601C;p.D1867D             | P117      |
| chr4  | 1.27E+08 | 1.27E+08 | C | T | exonic          | nonsynonymous SNV | FAT4     | NM_024582:c.C7763T;p.T2588I             | 0.04 P117 |
| chr4  | 1.57E+08 | 1.57E+08 | T | C | exonic          | synonymous SNV    | GUCY1A3  | NM_001130684:c.T411C;p.G137G            | P117      |
| chr5  | 1.41E+08 | 1.41E+08 | T | C | exonic          | nonsynonymous SNV | PCDHB13  | NM_018933:c.T1022C;p.V341A              | 0.24 P117 |
| chr5  | 1.51E+08 | 1.51E+08 | G | A | exonic          | synonymous SNV    | FAT2     | NM_001447:c.C960T;p.I320I               | P117      |
| chr5  | 1.69E+08 | 1.69E+08 | G | A | exonic          | nonsynonymous SNV | DOCK2    | NM_004946:c.G4852A;p.G1618S             | 0.03 P117 |
| chr6  | 1.3E+08  | 1.3E+08  | G | A | exonic          | synonymous SNV    | LAMA2    | NM_000426:c.G1419A;p.G473G              | P117      |
| chr6  | 1.47E+08 | 1.47E+08 | G | A | exonic          | nonsynonymous SNV | GRM1     | NM_000838:c.G3130A;p.A1044T             | 0.67 P117 |
| chr6  | 1.53E+08 | 1.53E+08 | C | A | exonic          | nonsynonymous SNV | SYNE1    | NM_033071:c.G7337T;p.S2446I             | 0.05 P117 |
| chr7  | 98414364 | 98414364 | G | A | exonic          | synonymous SNV    | TRRAP    | NM_003496:c.G8460A;p.T2820T             | P117      |
| chr12 | 25271542 | 25271542 | T | A | exonic          | nonsynonymous SNV | KRAS     | NM_004985:c.A183T;p.Q61H rs17851045     | 0.01 P117 |
| chr12 | 47450977 | 47450977 | G | A | exonic          | nonsynonymous SNV | ADCY6    | NM_015270:c.C3095T;p.T1032M             | 0 P117    |
| chr13 | 66103486 | 66103486 | C | G | exonic          | nonsynonymous SNV | PCDH9    | NM_020403:c.G3095C;p.S1032T             | 0.04 P117 |
| chr14 | 31691465 | 31691465 | C | T | exonic          | synonymous SNV    | ARHGAP5  | NM_001030055:c.C4161T;p.Y1387Y          | P117      |
| chr14 | 49654970 | 49654970 | G | A | exonic          | stopgain SNV      | SOS2     | NM_006939:c.C3841T;p.Q1281X             | P117      |
| chr15 | 67010073 | 67010073 | G | A | exonic          | synonymous SNV    | SPESP1   | NM_145658:c.G27A;p.A9A                  | P117      |
| chr16 | 4104616  | 4104616  | G | T | exonic          | nonsynonymous SNV | ADCY9    | NM_001116:c.C829A;p.L277M               | 0.17 P117 |
| chr16 | 4105000  | 4105000  | C | T | exonic          | nonsynonymous SNV | ADCY9    | NM_001116:c.G445A;p.A149T               | 0.4 P117  |
| chr16 | 23113091 | 23113091 | A | G | exonic          | nonsynonymous SNV | SCNN1G   | NM_001039:c.A908G;p.E303G               | 0.01 P117 |
| chr16 | 54076731 | 54076731 | C | A | exonic          | synonymous SNV    | MMP2     | NM_001127891:c.C399A;p.P133P            | P117      |
| chr17 | 3603395  | 3603395  | C | T | exonic          | nonsynonymous SNV | ITGAE    | NM_002208:c.G1606A;p.A536T              | 0 P117    |
| chr17 | 10292083 | 10292083 | G | T | exonic          | nonsynonymous SNV | MYH4     | NM_017533:c.C4742A;p.A1581D             | 0.04 P117 |
| chr18 | 6932160  | 6932160  | G | A | exonic          | nonsynonymous SNV | LAMA1    | NM_005559:c.C9146T;p.P3049L             | 0.35 P117 |
| chr19 | 43700163 | 43700163 | G | A | exonic          | nonsynonymous SNV | RYR1     | NM_000540:c.G10010A;p.R3337Q            | P117      |
| chrX  | 47314359 | 47314359 | C | T | exonic          | nonsynonymous SNV | ARAF     | NM_001654:c.C1543T;p.R515C              | 0 P117    |
| chr4  | 1.26E+08 | 1.26E+08 | G | A | exonic          | nonsynonymous SNV | FAT4     | NM_024582:c.G1333A;p.G445R              | P116      |
| chr5  | 1.12E+08 | 1.12E+08 | C | T | exonic          | stopgain SNV      | APC      | NM_001127511:c.C3286T;p.R1096X          | 0 P116    |

|       |          |          |   |   |          |                   |        |                               |            |           |
|-------|----------|----------|---|---|----------|-------------------|--------|-------------------------------|------------|-----------|
| chr5  | 1.4E+08  | 1.4E+08  | C | T | exonic   | synonymous SNV    | PCDHB4 | NM_018938:c.C2211T:p.D737D    |            | P116      |
| chr9  | 1.17E+08 | 1.17E+08 | T | A | splicing |                   | TNC    |                               |            | P116      |
| chr17 | 7519131  | 7519131  | C | T | exonic   | nonsynonymous SNV | TP53   | NM_001126115:c.G128A:p.R43H   | rs28934578 | 0 P116    |
| chr17 | 38456654 | 38456654 | T | C | exonic   | nonsynonymous SNV | BRCA1  | NM_007297:c.A5143G:p.R1715G   |            | 0 P116    |
| chr18 | 8384482  | 8384482  | G | A | exonic   | nonsynonymous SNV | PTPRM  | NM_002845:c.G4178A:p.G1393E   |            | 0.04 P116 |
| chr19 | 7881916  | 7881916  | G | A | exonic   | nonsynonymous SNV | MAP2K7 | NM_145185:c.G727A:p.D243N     |            | P116      |
| chr5  | 1.4E+08  | 1.4E+08  | C | T | exonic   | nonsynonymous SNV | PCDHA2 | NM_018905:c.C40T:p.R14W       |            | 0.19 P84  |
| chr12 | 25289551 | 25289551 | C | T | exonic   | nonsynonymous SNV | KRAS   | NM_004985:c.G35A:p.G12D       |            | 0 P84     |
| chr18 | 46858653 | 46858653 | G | A | exonic   | nonsynonymous SNV | SMAD4  | NM_005359:c.G1477A:p.D493N    |            | 0.05 P84  |
| chr1  | 11103914 | 11103914 | C | T | exonic   | synonymous SNV    | MTOR   | NM_004958:c.G6909A:p.L2303L   | rs11121691 | P85       |
| chr1  | 45042611 | 45042611 | G | C | exonic   | synonymous SNV    | PLK3   | NM_004073:c.G1356C:p.P452P    | rs11211036 | P85       |
| chr1  | 46294104 | 46294104 | G | A | exonic   | synonymous SNV    | PIK3R3 | NM_003629:c.C891T:p.S297S     | rs785468   | P85       |
| chr1  | 46294146 | 46294146 | A | T | exonic   | nonsynonymous SNV | PIK3R3 | NM_003629:c.T849A:p.N283K     | rs785467   | 1 P85     |
| chr1  | 70276525 | 70276525 | G | A | exonic   | synonymous SNV    | LRRC7  | NM_020794:c.G2316A:p.S772S    | rs12567778 | P85       |
| chr1  | 1.51E+08 | 1.51E+08 | T | C | exonic   | nonsynonymous SNV | FLG    | NM_002016:c.A2401G:p.K801E    |            | 1 P85     |
| chr1  | 1.84E+08 | 1.84E+08 | A | T | exonic   | nonsynonymous SNV | HMCN1  | NM_031935:c.A15260T:p.D5087V  | rs41317507 | 0.01 P85  |
| chr1  | 1.84E+08 | 1.84E+08 | C | T | exonic   | synonymous SNV    | HMCN1  | NM_031935:c.C15393T:p.S5131S  |            | P85       |
| chr1  | 1.84E+08 | 1.84E+08 | A | G | exonic   | nonsynonymous SNV | HMCN1  | NM_031935:c.A16568G:p.N5523S  |            | P85       |
| chr1  | 2.14E+08 | 2.14E+08 | T | C | exonic   | synonymous SNV    | USH2A  | NM_206933:c.A12666G:p.T4222T  | rs2797234  | P85       |
| chr1  | 2.14E+08 | 2.14E+08 | A | G | exonic   | synonymous SNV    | USH2A  | NM_206933:c.T5142C:p.N1714N   |            | P85       |
| chr1  | 2.14E+08 | 2.14E+08 | C | T | exonic   | nonsynonymous SNV | USH2A  | NM_007123:c.G4457A:p.R1486K   | rs1805049  | 1 P85     |
| chr1  | 2.28E+08 | 2.28E+08 | G | A | exonic   | synonymous SNV    | ACTA1  | NM_001100:c.C543T:p.D181D     |            | P85       |
| chr1  | 2.46E+08 | 2.46E+08 | A | G | exonic   | nonsynonymous SNV | OR2M5  | NM_001004690:c.A907G:p.K303E  | rs73141283 | 0.01 P85  |
| chr1  | 2.47E+08 | 2.47E+08 | C | T | exonic   | synonymous SNV    | OR2M7  | NM_001004691:c.G855A:p.L285L  | rs4451579  | P85       |
| chr2  | 15459788 | 15459788 | C | G | exonic   | nonsynonymous SNV | NBAS   | NM_015909:c.G3026C:p.C1009S   | rs74411619 | 1 P85     |
| chr2  | 15473213 | 15473213 | C | G | exonic   | nonsynonymous SNV | NBAS   | NM_015909:c.G2845C:p.V949L    | rs74727069 | 0.86 P85  |
| chr2  | 15473283 | 15473283 | A | G | exonic   | synonymous SNV    | NBAS   | NM_015909:c.T2775C:p.D925D    | rs79283114 | P85       |
| chr2  | 15530911 | 15530911 | T | C | exonic   | synonymous SNV    | NBAS   | NM_015909:c.A1611G:p.E537E    | rs35454315 | P85       |
| chr2  | 15616197 | 15616197 | G | C | exonic   | nonsynonymous SNV | NBAS   | NM_015909:c.C130G:p.Q44E      | rs77081203 | 1 P85     |
| chr2  | 1.16E+08 | 1.16E+08 | T | C | exonic   | nonsynonymous SNV | DPP10  | NM_001004360:c.T937C:p.Y313H  |            | 0 P85     |
| chr2  | 2.38E+08 | 2.38E+08 | C | G | exonic   | nonsynonymous SNV | COL6A3 | NM_057166:c.G7213C:p.A2405P   | rs2270669  | P85       |
| chr2  | 2.38E+08 | 2.38E+08 | C | T | exonic   | synonymous SNV    | COL6A3 | NM_057166:c.G6108A:p.A2036A   | rs4433949  | P85       |
| chr2  | 2.38E+08 | 2.38E+08 | C | G | exonic   | synonymous SNV    | COL6A3 | NM_057166:c.G5034C:p.G1678G   | rs3790993  | P85       |
| chr2  | 2.38E+08 | 2.38E+08 | C | T | exonic   | nonsynonymous SNV | COL6A3 | NM_057166:c.G2363A:p.R788Q    | rs80272723 | P85       |
| chr3  | 1.25E+08 | 1.25E+08 | G | T | exonic   | nonsynonymous SNV | MYLK   | NM_053025:c.C62A:p.P21H       | rs28497577 | 0.03 P85  |
| chr3  | 1.44E+08 | 1.44E+08 | A | G | exonic   | synonymous SNV    | ATR    | NM_001184:c.T5208C:p.Y1736Y   | rs2227931  | P85       |
| chr3  | 1.44E+08 | 1.44E+08 | A | G | exonic   | synonymous SNV    | ATR    | NM_001184:c.T1815C:p.D605D    | rs2227929  | P85       |
| chr3  | 1.44E+08 | 1.44E+08 | A | T | exonic   | synonymous SNV    | ATR    | NM_001184:c.T1776A:p.G592G    | rs2227930  | P85       |
| chr3  | 1.44E+08 | 1.44E+08 | A | G | exonic   | nonsynonymous SNV | ATR    | NM_001184:c.T632C:p.M211T     | rs2227928  | 0.15 P85  |
| chr3  | 1.53E+08 | 1.53E+08 | A | C | exonic   | synonymous SNV    | IGSF10 | NM_001178145:c.T672G:p.S224S  | rs9864533  | P85       |
| chr4  | 1.26E+08 | 1.26E+08 | C | G | exonic   | nonsynonymous SNV | FAT4   | NM_024582:c.C3769G:p.Q1257E   | rs36052762 | P85       |
| chr4  | 1.27E+08 | 1.27E+08 | T | C | exonic   | synonymous SNV    | FAT4   | NM_024582:c.T6585C:p.N2195N   | rs17009618 | P85       |
| chr4  | 1.27E+08 | 1.27E+08 | G | A | exonic   | nonsynonymous SNV | FAT4   | NM_024582:c.G10571A:p.G3524D  | rs1567047  | 0.06 P85  |
| chr4  | 1.56E+08 | 1.56E+08 | T | C | exonic   | nonsynonymous SNV | DCHS2  | NM_001142552:c.A2303G:p.H768F | rs10017772 | 0.49 P85  |
| chr4  | 1.56E+08 | 1.56E+08 | A | G | exonic   | nonsynonymous SNV | DCHS2  | NM_017639:c.T458C:p.V153A     | rs11721758 | 0.06 P85  |
| chr4  | 1.56E+08 | 1.56E+08 | T | C | exonic   | nonsynonymous SNV | DCHS2  | NM_001142552:c.A1858G:p.T620A | rs72731014 | 0.58 P85  |
| chr4  | 1.56E+08 | 1.56E+08 | G | A | exonic   | nonsynonymous SNV | DCHS2  | NM_001142552:c.C1841T:p.A614V | rs55810732 | 0.35 P85  |
| chr4  | 1.56E+08 | 1.56E+08 | G | C | exonic   | nonsynonymous SNV | DCHS2  | NM_001142552:c.C1777G:p.Q593f | rs72731016 | 1 P85     |
| chr4  | 1.56E+08 | 1.56E+08 | C | T | exonic   | nonsynonymous SNV | DCHS2  | NM_001142552:c.G44A:p.R15Q    | rs13149269 | 0.49 P85  |
| chr5  | 82869125 | 82869125 | A | G | exonic   | nonsynonymous SNV | VCAN   | NM_001164097:c.A1586G:p.K529F | rs309559   | 0 P85     |
| chr5  | 82870055 | 82870055 | G | A | exonic   | nonsynonymous SNV | VCAN   | NM_001164097:c.G2516A:p.R839f | rs188703   | 0 P85     |
| chr5  | 82870386 | 82870386 | T | C | exonic   | synonymous SNV    | VCAN   | NM_001164097:c.T2847C:p.G949C | rs309557   | P85       |
| chr5  | 82871301 | 82871301 | A | G | exonic   | synonymous SNV    | VCAN   | NM_001164097:c.A3762G:p.R1254 | rs160279   | P85       |

|      |          |          |   |   |        |                   |         |                                |            |      |     |
|------|----------|----------|---|---|--------|-------------------|---------|--------------------------------|------------|------|-----|
| chr5 | 82871480 | 82871480 | T | A | exonic | nonsynonymous SN\ | VCAN    | NM_001164097:c.T3941A:p.F1314  | rs160278   | 0    | P85 |
| chr5 | 82873387 | 82873387 | G | T | exonic | nonsynonymous SN\ | VCAN    | NM_001164097:c.G5848T:p.D1950  | rs160277   | 0    | P85 |
| chr5 | 82879620 | 82879620 | C | G | exonic | nonsynonymous SN\ | VCAN    | NM_001126336:c.C1231G:p.L411V  |            | 0.02 | P85 |
| chr5 | 1.4E+08  | 1.4E+08  | C | T | exonic | synonymous SNV    | PCDHA1  | NM_018900:c.C1588T:p.L530L     | rs3733710  |      | P85 |
| chr5 | 1.4E+08  | 1.4E+08  | A | G | exonic | nonsynonymous SN\ | PCDHA1  | NM_018900:c.A2195G:p.Y732C     | rs2240696  | 1    | P85 |
| chr5 | 1.4E+08  | 1.4E+08  | G | T | exonic | nonsynonymous SN\ | PCDHA1  | NM_018900:c.G2276T:p.C759F     | rs2240695  | 0    | P85 |
| chr5 | 1.4E+08  | 1.4E+08  | G | A | exonic | nonsynonymous SN\ | PCDHA2  | NM_018905:c.G73A:p.E25K        | rs9686540  | 0.12 | P85 |
| chr5 | 1.4E+08  | 1.4E+08  | G | C | exonic | nonsynonymous SN\ | PCDHA2  | NM_018905:c.G316C:p.V106L      | rs11167600 | 1    | P85 |
| chr5 | 1.4E+08  | 1.4E+08  | T | C | exonic | synonymous SNV    | PCDHA3  | NM_018906:c.T1110C:p.A370A     | rs3733707  |      | P85 |
| chr5 | 1.4E+08  | 1.4E+08  | G | T | exonic | nonsynonymous SN\ | PCDHA3  | NM_018906:c.G1319T:p.S440I     | rs7701755  | 0.02 | P85 |
| chr5 | 1.4E+08  | 1.4E+08  | G | A | exonic | nonsynonymous SN\ | PCDHA3  | NM_018906:c.G2276A:p.C759Y     | rs2240694  | 0    | P85 |
| chr5 | 1.4E+08  | 1.4E+08  | T | G | exonic | synonymous SNV    | PCDHA4  | NM_018907:c.T1611G:p.A537A     | rs2337987  |      | P85 |
| chr5 | 1.4E+08  | 1.4E+08  | A | G | exonic | synonymous SNV    | PCDHA4  | NM_018907:c.A1629G:p.P543P     | rs2879086  |      | P85 |
| chr5 | 1.4E+08  | 1.4E+08  | G | C | exonic | synonymous SNV    | PCDHA4  | NM_018907:c.G1803C:p.S601S     | rs2879087  |      | P85 |
| chr5 | 1.4E+08  | 1.4E+08  | G | C | exonic | nonsynonymous SN\ | PCDHA5  | NM_018908:c.G2065C:p.E689Q     | rs17844298 | 0.11 | P85 |
| chr5 | 1.4E+08  | 1.4E+08  | C | T | exonic | nonsynonymous SN\ | PCDHA5  | NM_018908:c.C2072T:p.A691V     | rs4141841  | 0.04 | P85 |
| chr5 | 1.4E+08  | 1.4E+08  | T | G | exonic | synonymous SNV    | PCDHA6  | NM_018909:c.T1791G:p.V597V     | rs7710794  |      | P85 |
| chr5 | 1.4E+08  | 1.4E+08  | A | G | exonic | nonsynonymous SN\ | PCDHA8  | NM_018911:c.A1735G:p.K579E     | rs6580012  | 1    | P85 |
| chr5 | 1.4E+08  | 1.4E+08  | G | A | exonic | synonymous SNV    | PCDHAC1 | NM_018898:c.G807A:p.Q269Q      | rs155361   |      | P85 |
| chr5 | 1.4E+08  | 1.4E+08  | C | G | exonic | synonymous SNV    | PCDHAC1 | NM_018898:c.C1269G:p.P423P     | rs155820   |      | P85 |
| chr5 | 1.4E+08  | 1.4E+08  | C | G | exonic | nonsynonymous SN\ | PCDHAC1 | NM_018898:c.C1492G:p.L498V     | rs246074   | 1    | P85 |
| chr5 | 1.4E+08  | 1.4E+08  | G | A | exonic | synonymous SNV    | PCDHB4  | NM_018938:c.G597A:p.L199L      | rs3776100  |      | P85 |
| chr5 | 1.4E+08  | 1.4E+08  | C | G | exonic | nonsynonymous SN\ | PCDHB5  | NM_015669:c.C776G:p.S259C      |            | 0.02 | P85 |
| chr5 | 1.41E+08 | 1.41E+08 | G | C | exonic | nonsynonymous SN\ | PCDHB7  | NM_018940:c.G1165C:p.V389L     | rs2910313  | 1    | P85 |
| chr5 | 1.41E+08 | 1.41E+08 | G | A | exonic | synonymous SNV    | PCDHB7  | NM_018940:c.G1440A:p.S480S     | rs2907330  |      | P85 |
| chr5 | 1.41E+08 | 1.41E+08 | C | G | exonic | synonymous SNV    | PCDHB7  | NM_018940:c.C1590G:p.R530R     | rs2907329  |      | P85 |
| chr5 | 1.41E+08 | 1.41E+08 | T | C | exonic | synonymous SNV    | PCDHB7  | NM_018940:c.T2190C:p.F730F     | rs11741863 |      | P85 |
| chr5 | 1.41E+08 | 1.41E+08 | G | T | exonic | synonymous SNV    | PCDHB11 | NM_018931:c.G2163T:p.S721S     | rs638054   |      | P85 |
| chr5 | 1.51E+08 | 1.51E+08 | G | A | exonic | nonsynonymous SN\ | FAT2    | NM_001447:c.C3491T:p.P1164L    | rs2304053  | 0.02 | P85 |
| chr5 | 1.69E+08 | 1.69E+08 | G | A | exonic | synonymous SNV    | DOCK2   | NM_004946:c.G2727A:p.Q909Q     | rs261623   |      | P85 |
| chr6 | 90717040 | 90717040 | T | C | exonic | synonymous SNV    | BACH2   | NM_001170794:c.A1506G:p.V502V  | rs9451298  |      | P85 |
| chr6 | 90717475 | 90717475 | G | A | exonic | synonymous SNV    | BACH2   | NM_001170794:c.C1071T:p.P357P  | rs2236182  |      | P85 |
| chr6 | 1.29E+08 | 1.29E+08 | C | T | exonic | synonymous SNV    | LAMA2   | NM_000426:c.C156T:p.I52I       | rs1140366  |      | P85 |
| chr6 | 1.3E+08  | 1.3E+08  | T | C | exonic | synonymous SNV    | LAMA2   | NM_000426:c.T1491C;p.C497C     | rs2306220  |      | P85 |
| chr6 | 1.53E+08 | 1.53E+08 | T | C | exonic | synonymous SNV    | SYNE1   | NM_133650:c.A1479G:p.E493E     | rs2747662  |      | P85 |
| chr6 | 1.53E+08 | 1.53E+08 | C | G | exonic | nonsynonymous SN\ | SYNE1   | NM_133650:c.G1454C:p.G485A     | rs2252755  | 0.52 | P85 |
| chr6 | 1.53E+08 | 1.53E+08 | C | T | exonic | synonymous SNV    | SYNE1   | NM_133650:c.G1311A;p.P437P     | rs2252748  |      | P85 |
| chr6 | 1.53E+08 | 1.53E+08 | T | G | exonic | nonsynonymous SN\ | SYNE1   | NM_133650:c.A967C:p.N323H      | rs36215251 | 0.01 | P85 |
| chr6 | 1.53E+08 | 1.53E+08 | C | T | exonic | nonsynonymous SN\ | SYNE1   | NM_015293:c.G911A:p.R304Q      | rs76160752 | 0.09 | P85 |
| chr6 | 1.66E+08 | 1.66E+08 | T | C | exonic | synonymous SNV    | PDE10A  | NM_001130690:c.A204G:p.S68S    | rs9459421  |      | P85 |
| chr6 | 1.69E+08 | 1.69E+08 | A | G | exonic | synonymous SNV    | THBS2   | NM_003247:c.T3360C;p.T1120T    | rs1132742  |      | P85 |
| chr6 | 1.69E+08 | 1.69E+08 | G | A | exonic | synonymous SNV    | THBS2   | NM_003247:c.C2007T;p.G669G     | rs35935937 |      | P85 |
| chr7 | 37265325 | 37265325 | C | T | exonic | synonymous SNV    | ELMO1   | NM_014800:c.G399A:p.V133V      | rs2717968  |      | P85 |
| chr7 | 98388831 | 98388831 | A | T | exonic | nonsynonymous SN\ | TRRAP   | NM_003496:c.A5494T:p.N1832Y    |            | 0.05 | P85 |
| chr7 | 98418967 | 98418967 | G | A | exonic | nonsynonymous SN\ | TRRAP   | NM_003496:c.G8896A;p.D2966N    |            | 0    | P85 |
| chr7 | 1E+08    | 1E+08    | T | A | exonic | nonsynonymous SN\ | MUC17   | NM_001040105:c.T2229A:p.S743R  |            |      | P85 |
| chr7 | 1E+08    | 1E+08    | A | T | exonic | nonsynonymous SN\ | MUC17   | NM_001040105:c.A9215T;p.D3072V |            |      | P85 |
| chr7 | 1.03E+08 | 1.03E+08 | T | C | exonic | synonymous SNV    | RELN    | NM_005045:c.A8136G:p.L2712L    | rs3808039  |      | P85 |
| chr7 | 1.03E+08 | 1.03E+08 | A | G | exonic | synonymous SNV    | RELN    | NM_005045:c.T7110C;p.V2370V    | rs362746   |      | P85 |
| chr7 | 1.03E+08 | 1.03E+08 | G | C | exonic | nonsynonymous SN\ | RELN    | NM_005045:c.C2989G;p.L997V     | rs362691   | 0.86 | P85 |
| chr7 | 1.52E+08 | 1.52E+08 | C | T | exonic | synonymous SNV    | MLL3    | NM_170606:c.G8685A:p.Q2895Q    | rs6464211  |      | P85 |
| chr7 | 1.52E+08 | 1.52E+08 | C | T | exonic | synonymous SNV    | MLL3    | NM_170606:c.G8040A;p.Q2680Q    | rs10252263 |      | P85 |
| chr7 | 1.52E+08 | 1.52E+08 | C | G | exonic | nonsynonymous SN\ | MLL3    | NM_170606:c.G1577C;p.R526P     | rs3735156  | 0.12 | P85 |

|       |          |          |   |   |        |                   |          |                               |             |      |     |
|-------|----------|----------|---|---|--------|-------------------|----------|-------------------------------|-------------|------|-----|
| chr9  | 96909357 | 96909357 | C | T | exonic | nonsynonymous SN\ | FANCC    | NM_000136:c.G1345A:p.V449M    | rs1800367   | 0.07 | P85 |
| chr9  | 1.17E+08 | 1.17E+08 | C | T | exonic | synonymous SNV    | TNC      | NM_002160:c.G6144A:p.G2048G   | rs79563958  |      | P85 |
| chr9  | 1.17E+08 | 1.17E+08 | G | A | exonic | synonymous SNV    | TNC      | NM_002160:c.C3165T:p.A1055A   | rs3748172   |      | P85 |
| chr9  | 1.23E+08 | 1.23E+08 | T | C | exonic | nonsynonymous SN\ | TRAF1    | NM_001190947:c.A170G:p.Q57R   |             | 0.51 | P85 |
| chr9  | 1.24E+08 | 1.24E+08 | C | G | exonic | nonsynonymous SN\ | OR1L1    | NM_001005236:c.C195G:p.I65M   | rs73571128  | 0.01 | P85 |
| chr10 | 35969356 | 35969356 | C | T | exonic | synonymous SNV    | FZD8     | NM_031866:c.G1008A:p.E336E    | rs73270587  |      | P85 |
| chr10 | 55625491 | 55625491 | A | G | exonic | synonymous SNV    | PCDH15   | NM_001142767:c.T1152C:p.T384T | rs7921598   |      | P85 |
| chr10 | 55625616 | 55625616 | C | T | exonic | nonsynonymous SN\ | PCDH15   | NM_001142767:c.G1027A:p.G343G | rs10825269  | 0.68 | P85 |
| chr10 | 97164342 | 97164342 | T | C | exonic | nonsynonymous SN\ | SORBS1   | NM_001034954:c.A709G:p.T237A  | rs2281939   | 0    | P85 |
| chr10 | 1.06E+08 | 1.06E+08 | T | C | exonic | nonsynonymous SN\ | COL17A1  | NM_000494:c.A4109G:p.D1370G   | rs17116350  | 0.49 | P85 |
| chr10 | 1.16E+08 | 1.16E+08 | T | A | exonic | nonsynonymous SN\ | C10orf81 | NM_001193435:c.T205A:p.F69I   | rs41292632  | 0.16 | P85 |
| chr10 | 1.16E+08 | 1.16E+08 | T | C | exonic | synonymous SNV    | C10orf81 | NM_001193435:c.T759C:p.A253A  | rs3750901   |      | P85 |
| chr10 | 1.16E+08 | 1.16E+08 | T | C | exonic | synonymous SNV    | C10orf81 | NM_001193435:c.T972C:p.A324A  | rs11196483  |      | P85 |
| chr11 | 1.24E+08 | 1.24E+08 | A | G | exonic | synonymous SNV    | OR8B8    | NM_012378:c.T360C:p.Y120Y     | rs4296049   |      | P85 |
| chr12 | 6043776  | 6043776  | G | A | exonic | synonymous SNV    | VWF      | NM_000552:c.C1329T:p.S443S    |             |      | P85 |
| chr12 | 25254044 | 25254044 | A | G | exonic | synonymous SNV    | KRAS     | NM_004985:c.T519C:p.D173D     | rs1137282   |      | P85 |
| chr12 | 46812979 | 46812979 | G | A | exonic | nonsynonymous SN\ | PFKM     | NM_001166688:c.G299A:p.R100Q  | rs2228500   | 0.42 | P85 |
| chr12 | 1.08E+08 | 1.08E+08 | G | A | exonic | nonsynonymous SN\ | ACACB    | NM_001093:c.G1951A:p.A651T    | rs2300455   | 0.01 | P85 |
| chr12 | 1.08E+08 | 1.08E+08 | C | T | exonic | synonymous SNV    | ACACB    | NM_001093:c.C6204T:p.H2068H   | rs3742023   |      | P85 |
| chr12 | 1.28E+08 | 1.28E+08 | C | T | exonic | synonymous SNV    | TMEM132D | NM_133448:c.G1821A:p.T607T    | rs79031518  |      | P85 |
| chr13 | 23907297 | 23907297 | G | T | exonic | nonsynonymous SN\ | PARP4    | NM_006437:c.C3982A:p.P1328T   | rs1050112   | 0.64 | P85 |
| chr13 | 23907441 | 23907441 | C | G | exonic | nonsynonymous SN\ | PARP4    | NM_006437:c.G3838C:p.G1280R   | rs13428     | 0.09 | P85 |
| chr13 | 23907485 | 23907485 | C | G | exonic | nonsynonymous SN\ | PARP4    | NM_006437:c.G3794C:p.G1265A   | rs1050110   | 1    | P85 |
| chr13 | 23927295 | 23927295 | C | T | exonic | nonsynonymous SN\ | PARP4    | NM_006437:c.G2618A:p.S873N    | rs7140044   | 0.53 | P85 |
| chr13 | 66103521 | 66103521 | A | G | exonic | synonymous SNV    | PCDH9    | NM_020403:c.T3060C:p.H1020H   | rs3764117   |      | P85 |
| chr14 | 22944381 | 22944381 | C | T | exonic | synonymous SNV    | MYH6     | NM_002471:c.G393A:p.L131L     | rs17277970  |      | P85 |
| chr14 | 90596510 | 90596510 | T | C | exonic | nonsynonymous SN\ | RPS6KA5  | NM_004755:c.A22G:p.S8G        |             | 0.47 | P85 |
| chr15 | 67111013 | 67111013 | C | G | exonic | nonsynonymous SN\ | NOX5     | NM_001184779:c.C343G:p.P115A  | rs78571685  |      | P85 |
| chr15 | 75131848 | 75131848 | T | A | exonic | synonymous SNV    | TSPAN3   | NM_001168412:c.A411T:p.V137V  | rs111737    |      | P85 |
| chr16 | 4104365  | 4104365  | C | T | exonic | synonymous SNV    | ADCY9    | NM_001116:c.G1080A:p.R360R    | rs2230738   |      | P85 |
| chr16 | 54094228 | 54094228 | C | T | exonic | synonymous SNV    | MMP2     | NM_001127891:c.C1656T:p.F552F | rs14070     |      | P85 |
| chr17 | 3577990  | 3577990  | A | G | exonic | nonsynonymous SN\ | ITGAE    | NM_002208:c.T3056C:p.V1019A   | rs2976230   | 0.09 | P85 |
| chr17 | 10250337 | 10250337 | T | C | exonic | synonymous SNV    | MYH8     | NM_002472:c.A2274G:p.Q758Q    |             |      | P85 |
| chr17 | 10358154 | 10358154 | G | A | exonic | synonymous SNV    | MYH1     | NM_005963:c.C546T:p.G182G     | rs113019239 |      | P85 |
| chr17 | 10482240 | 10482240 | C | T | exonic | nonsynonymous SN\ | MYH3     | NM_002470:c.G3574A:p.A1192T   | rs2285477   | 0.56 | P85 |
| chr17 | 10484188 | 10484188 | T | C | exonic | synonymous SNV    | MYH3     | NM_002470:c.A2532G:p.A844A    | rs2285469   |      | P85 |
| chr17 | 38509679 | 38509679 | C | T | exonic | nonsynonymous SN\ | BRC A1   | NM_007297:c.G286A:p.E96K      | rs80356991  | 0.03 | P85 |
| chr17 | 43090974 | 43090974 | G | A | exonic | synonymous SNV    | KPNB1    | NM_002265:c.G585A:p.T195T     | rs1136613   |      | P85 |
| chr17 | 43105467 | 43105467 | T | C | exonic | synonymous SNV    | KPNB1    | NM_002265:c.T1632C:p.Y544Y    | rs1136614   |      | P85 |
| chr17 | 75907784 | 75907784 | A | T | exonic | nonsynonymous SN\ | RNF213   | NM_020954:c.A3101T:p.K1034M   | rs55996424  | 0    | P85 |
| chr17 | 75920466 | 75920466 | G | A | exonic | nonsynonymous SN\ | RNF213   | NM_020914:c.G3730A:p.V1244M   | rs10782008  |      | P85 |
| chr17 | 75920697 | 75920697 | G | C | exonic | nonsynonymous SN\ | RNF213   | NM_020914:c.G3961C:p.E1321Q   | rs9913636   |      | P85 |
| chr17 | 75920875 | 75920875 | A | G | exonic | nonsynonymous SN\ | RNF213   | NM_020914:c.A4139G:p.D1380G   | rs8074015   |      | P85 |
| chr17 | 75920903 | 75920903 | C | G | exonic | synonymous SNV    | RNF213   | NM_020914:c.C4167G:p.V1389V   | rs9908287   |      | P85 |
| chr17 | 75926103 | 75926103 | G | A | exonic | synonymous SNV    | RNF213   | NM_020914:c.G4797A:p.A1599A   | rs4890009   |      | P85 |
| chr17 | 75933731 | 75933731 | G | A | exonic | nonsynonymous SN\ | RNF213   | NM_020914:c.G7148A:p.S2383N   | rs9674961   | 0.44 | P85 |
| chr17 | 75933975 | 75933975 | G | C | exonic | synonymous SNV    | RNF213   | NM_020914:c.G7392C:p.P2464P   | rs4890012   |      | P85 |
| chr17 | 75941953 | 75941953 | G | A | exonic | synonymous SNV    | RNF213   | NM_020914:c.G10617A:p.E3539E  | rs7216493   | 0.24 | P85 |
| chr17 | 75961443 | 75961443 | C | T | exonic | synonymous SNV    | RNF213   | NM_020914:c.C12972T:p.H4324H  |             |      | P85 |
| chr17 | 75969256 | 75969256 | C | T | exonic | synonymous SNV    | RNF213   | NM_020914:c.C13818T:p.H4606H  | rs4889848   |      | P85 |
| chr18 | 6967844  | 6967844  | A | G | exonic | nonsynonymous SN\ | LAMA1    | NM_005559:c.T6227C:p.I2076T   | rs671871    | 0.67 | P85 |
| chr18 | 7007322  | 7007322  | A | G | exonic | synonymous SNV    | LAMA1    | NM_005559:c.T2763C:p.C921C    | rs539713    |      | P85 |
| chr18 | 8369303  | 8369303  | G | A | exonic | nonsynonymous SN\ | PTPRM    | NM_002845:c.G3712A:p.E1238K   |             | 0.01 | P85 |

|       |          |          |   |   |        |                            |                                |             |      |      |
|-------|----------|----------|---|---|--------|----------------------------|--------------------------------|-------------|------|------|
| chr18 | 48686600 | 48686600 | C | G | exonic | nonsynonymous SN\ DCC      | NM_005215:c.C601G:p.R201G      | rs2229080   | 0.42 | P85  |
| chr18 | 59321762 | 59321762 | A | G | exonic | nonsynonymous SN\ SERPINB5 | NM_002639:c.A955G:p.I319V      | rs1455555   |      | P85  |
| chr19 | 7881586  | 7881586  | C | T | exonic | synonymous SNV MAP2K7      | NM_145185:c.C573T:p.D191D      | rs2303701   |      | P85  |
| chr19 | 43685405 | 43685405 | G | A | exonic | synonymous SNV RYR1        | NM_000540:c.G7881A:p.V2627V    |             |      | P85  |
| chr19 | 47960225 | 47960225 | A | G | exonic | nonsynonymous SN\ PSG8     | NM_001130167:c.T113C:p.I38T    | rs75687580  | 0.17 | P85  |
| chr20 | 23369101 | 23369101 | G | A | exonic | nonsynonymous SN\ CSTL1    | NM_138283:c.G197A:p.R66K       | rs17757442  | 0.58 | P85  |
| chr20 | 23372613 | 23372613 | T | C | exonic | nonsynonymous SN\ CSTL1    | NM_138283:c.T262C:p.W88R       | rs3746736   | 1    | P85  |
| chr20 | 23372638 | 23372638 | C | T | exonic | nonsynonymous SN\ CSTL1    | NM_138283:c.C287T:p.T96M       | rs3746737   | 0.01 | P85  |
| chr20 | 23372660 | 23372660 | G | C | exonic | synonymous SNV CSTL1       | NM_138283:c.G309C:p.L103L      | rs12625959  |      | P85  |
| chr21 | 45722671 | 45722671 | C | G | exonic | synonymous SNV COL18A1     | NM_030582:c.C1764G:p.G588G     | rs13046486  |      | P85  |
| chrX  | 1E+08    | 1E+08    | G | A | exonic | synonymous SNV BTK         | NM_000061:c.C1899T:p.C633C     | rs1135363   |      | P85  |
| chrX  | 1.12E+08 | 1.12E+08 | C | T | exonic | synonymous SNV AMOT        | NM_001113490:c.G2946A:p.P982P  |             |      | P85  |
| chrX  | 1.52E+08 | 1.52E+08 | G | C | exonic | synonymous SNV ATP2B3      | NM_001001344:c.G2592C:p.V864   | rs2269415   |      | P85  |
| chr1  | 1.84E+08 | 1.84E+08 | G | A | exonic | nonsynonymous SN\ HMCN1    | NM_031935:c.G9595A:p.E3199K    |             | 0.32 | P82  |
| chr2  | 1.7E+08  | 1.7E+08  | G | A | exonic | nonsynonymous SN\ LRP2     | NM_004525:c.C9127T:p.R3043C    |             | 0    | P82  |
| chr2  | 2.38E+08 | 2.38E+08 | C | T | exonic | synonymous SNV COL6A3      | NM_057166:c.G6423A:p.P2141P    | rs113754336 |      | P82  |
| chr5  | 1.12E+08 | 1.12E+08 | C | T | exonic | stopgain SNV APC           | NM_001127511:c.C3286T:p.R1096X |             | 0    | P82  |
| chr5  | 1.12E+08 | 1.12E+08 | C | T | exonic | stopgain SNV APC           | NM_001127511:c.C4294T:p.R1432X |             | 0.04 | P82  |
| chr6  | 1.53E+08 | 1.53E+08 | C | A | exonic | nonsynonymous SN\ SYNE1    | NM_033071:c.G7767T:p.Q2589H    |             | 0.28 | P82  |
| chr12 | 25289551 | 25289551 | C | T | exonic | nonsynonymous SN\ KRAS     | NM_004985:c.G35A:p.G12D        |             | 0    | P82  |
| chr4  | 1.57E+08 | 1.57E+08 | G | A | exonic | synonymous SNV GUCY1A3     | NM_001130684:c.G687A:p.T229T   |             |      | P83  |
| chr5  | 1.12E+08 | 1.12E+08 | A | T | exonic | stopgain SNV APC           | NM_001127511:c.A2923T:p.K975X  |             | 0    | P83  |
| chr5  | 1.12E+08 | 1.12E+08 | C | T | exonic | stopgain SNV APC           | NM_001127511:c.C4231T:p.Q1411X |             | 0    | P83  |
| chr7  | 1.03E+08 | 1.03E+08 | T | G | exonic | nonsynonymous SN\ RELN     | NM_005045:c.A8093C:p.D2698A    |             | 0.24 | P83  |
| chr9  | 1.37E+08 | 1.37E+08 | C | T | exonic | nonsynonymous SN\ COL5A1   | NM_000093:c.C4706T:p.P1569L    |             | 0    | P83  |
| chr12 | 25289551 | 25289551 | C | T | exonic | nonsynonymous SN\ KRAS     | NM_004985:c.G35A:p.G12D        |             | 0    | P83  |
| chr17 | 7518263  | 7518263  | C | T | exonic | nonsynonymous SN\ TP53     | NM_001126115:c.G347A:p.R116Q   | rs11540652  | 0.02 | P83  |
| chr18 | 61680920 | 61680920 | C | T | exonic | nonsynonymous SN\ CDH7     | NM_004361:c.C1651T:p.R551W     |             | 0.01 | P83  |
| chr1  | 1.51E+08 | 1.51E+08 | C | A | exonic | synonymous SNV FLG         | NM_002016:c.G2433T:p.G811G     |             |      | P109 |
| chr4  | 1.57E+08 | 1.57E+08 | G | T | exonic | nonsynonymous SN\ GUCY1A3  | NM_001130684:c.G1110T:p.M370I  |             | 0    | P109 |
| chr5  | 82869818 | 82869818 | C | T | exonic | nonsynonymous SN\ VCAN     | NM_001164097:c.C2279T:p.S760L  |             | 0    | P109 |
| chr5  | 1.12E+08 | 1.12E+08 | C | T | exonic | stopgain SNV APC           | NM_001127511:c.C3928T:p.Q1310X |             | 0.15 | P109 |
| chr5  | 1.51E+08 | 1.51E+08 | C | T | exonic | synonymous SNV FAT2        | NM_0011447:c.G9261A:p.A3087A   |             |      | P109 |
| chr14 | 90426688 | 90426688 | G | A | exonic | nonsynonymous SN\ RPS6KA5  | NM_004755:c.C1732T:p.P578S     |             | 0.39 | P109 |
| chr15 | 67112539 | 67112539 | C | T | exonic | synonymous SNV NOX5        | NM_001184779:c.C639T:p.C213C   |             |      | P109 |
| chr17 | 7518933  | 7518933  | T | C | exonic | nonsynonymous SN\ TP53     | NM_001126115:c.A245G:p.H82R    |             | 0.02 | P109 |
| chr18 | 8059951  | 8059951  | G | A | exonic | nonsynonymous SN\ PTPRM    | NM_001105244:c.G1400A:p.R467Q  |             | 0.1  | P109 |
| chr1  | 2.14E+08 | 2.14E+08 | T | C | exonic | synonymous SNV USH2A       | NM_206933:c.A12081G:p.Q4027Q   |             |      | P108 |
| chr1  | 2.14E+08 | 2.14E+08 | G | T | exonic | nonsynonymous SN\ USH2A    | NM_206933:c.C6043A:p.L2015I    |             | 0.23 | P108 |
| chr3  | 58114305 | 58114305 | C | A | exonic | synonymous SNV FLNB        | NM_001164319:c.C6459A:p.T2153T |             |      | P108 |
| chr3  | 1.25E+08 | 1.25E+08 | T | C | exonic | nonsynonymous SN\ MYLK     | NM_053031:c.A365G:p.K122R      |             | 0.78 | P108 |
| chr3  | 1.44E+08 | 1.44E+08 | T | A | exonic | synonymous SNV ATR         | NM_0011184:c.A5841T:p.A1947A   |             |      | P108 |
| chr4  | 1.26E+08 | 1.26E+08 | A | G | exonic | nonsynonymous SN\ FAT4     | NM_024582:c.A4645G:p.T1549A    |             |      | P108 |
| chr4  | 1.27E+08 | 1.27E+08 | T | C | exonic | synonymous SNV FAT4        | NM_024582:c.T5637C:p.I1879I    |             |      | P108 |
| chr4  | 1.27E+08 | 1.27E+08 | T | C | exonic | synonymous SNV FAT4        | NM_024582:c.T12591C:p.C4197C   |             |      | P108 |
| chr5  | 1.12E+08 | 1.12E+08 | C | T | exonic | stopgain SNV APC           | NM_001127511:c.C1441T:p.R481X  |             | 0    | P108 |
| chr5  | 1.4E+08  | 1.4E+08  | A | G | exonic | nonsynonymous SN\ PCDHA7   | NM_018910:c.A2090G:p.N697S     |             | 0.02 | P108 |
| chr5  | 1.4E+08  | 1.4E+08  | T | C | exonic | nonsynonymous SN\ PCDHB3   | NM_018937:c.T347C:p.F116S      |             | 0.15 | P108 |
| chr5  | 1.51E+08 | 1.51E+08 | G | A | exonic | nonsynonymous SN\ FAT2     | NM_0011447:c.C8182T:p.R2728W   |             | 0.03 | P108 |
| chr6  | 1.66E+08 | 1.66E+08 | A | G | exonic | nonsynonymous SN\ PDE10A   | NM_001130690:c.T116C:p.V39A    |             | 0.14 | P108 |
| chr6  | 1.69E+08 | 1.69E+08 | C | T | exonic | nonsynonymous SN\ THBS2    | NM_003247:c.G2683A:p.A895T     |             | 0.01 | P108 |
| chr7  | 93876037 | 93876037 | G | A | exonic | nonsynonymous SN\ COL1A2   | NM_000089:c.G758A:p.G253D      | rs72656385  | 0    | P108 |
| chr7  | 93883733 | 93883733 | A | G | exonic | synonymous SNV COL1A2      | NM_000089:c.A1845G:p.P615P     |             |      | P108 |

|       |          |          |   |   |        |                           |                                         |      |      |
|-------|----------|----------|---|---|--------|---------------------------|-----------------------------------------|------|------|
| chr7  | 1.51E+08 | 1.51E+08 | T | C | exonic | nonsynonymous SN\ MLL3    | NM_170606:c.A13639G;p.T4547A            | 0.12 | P108 |
| chr7  | 1.54E+08 | 1.54E+08 | T | C | exonic | nonsynonymous SN\ PAXIP1  | NM_007349:c.A1493G;p.Q498R              | 0.15 | P108 |
| chr10 | 55236367 | 55236367 | T | C | exonic | nonsynonymous SN\ PCDH15  | NM_001142772:c.A5012G;p.H1671R          |      | P108 |
| chr11 | 1.08E+08 | 1.08E+08 | A | G | exonic | nonsynonymous SN\ ATM     | NM_0000051:c.A7201G;p.I2401V            | 0.1  | P108 |
| chr12 | 47463026 | 47463026 | C | T | exonic | synonymous SNV ADCY6      | NM_015270:c.G459A;p.T153T               |      | P108 |
| chr12 | 1.08E+08 | 1.08E+08 | G | A | exonic | synonymous SNV ACACB      | NM_001093:c.G687A;p.R229R               |      | P108 |
| chr12 | 1.31E+08 | 1.31E+08 | A | G | exonic | nonsynonymous SN\ EP400   | NM_015409:c.A4472G;p.Q1491R             | 0.09 | P108 |
| chr14 | 49676469 | 49676469 | T | C | exonic | nonsynonymous SN\ SOS2    | NM_006939:c.A2726G;p.H909R              | 0.19 | P108 |
| chr15 | 26032396 | 26032396 | A | G | exonic | nonsynonymous SN\ HERC2   | NM_004667:c.T13937C;p.V4646A            | 0.01 | P108 |
| chr17 | 26584320 | 26584320 | C | T | exonic | nonsynonymous SN\ NF1     | NM_000267:c.C3671T;p.A1224V             | 0.17 | P108 |
| chr17 | 26687569 | 26687569 | T | C | exonic | synonymous SNV NF1        | NM_000267:c.T6036C;p.D2012D             |      | P108 |
| chr17 | 38500070 | 38500070 | C | A | exonic | nonsynonymous SN\ BRCA1   | NM_007297:c.G863T;p.S288I               | 0    | P108 |
| chr19 | 60038367 | 60038367 | C | G | exonic | nonsynonymous SN\ KIR2DS4 | NM_012314:c.C56G;p.A19G                 | 0    | P108 |
| chr1  | 1.84E+08 | 1.84E+08 | G | A | exonic | nonsynonymous SN\ HMCN1   | NM_031935:c.G7328A;p.R2443Q             | 0.33 | P80  |
| chr2  | 1.7E+08  | 1.7E+08  | C | T | exonic | nonsynonymous SN\ LRP2    | NM_004525:c.G7627A;p.V2543I             | 0.5  | P80  |
| chr2  | 1.7E+08  | 1.7E+08  | C | T | exonic | nonsynonymous SN\ LRP2    | NM_004525:c.G2494A;p.V832I              | 0.04 | P80  |
| chr5  | 1.12E+08 | 1.12E+08 | C | A | exonic | stopgain SNV APC          | NM_001127511:c.C4145A;p.S1382X          | 0.08 | P80  |
| chr6  | 1.53E+08 | 1.53E+08 | C | A | exonic | nonsynonymous SN\ SYNE1   | NM_033071:c.G5308T;p.V1770L             | 0.76 | P80  |
| chr12 | 25289552 | 25289552 | C | T | exonic | nonsynonymous SN\ KRAS    | NM_004985:c.G34A;p.G12S                 | 0    | P80  |
| chr13 | 66699776 | 66699776 | G | A | exonic | synonymous SNV PCDH9      | NM_020403:c.C798T;p.P266P               |      | P80  |
| chr17 | 7517845  | 7517845  | C | T | exonic | nonsynonymous SN\ TP53    | NM_001126115:c.G422A;p.R141H rs28934576 | 0.01 | P80  |
| chr4  | 1.57E+08 | 1.57E+08 | G | A | exonic | nonsynonymous SN\ GUCY1A3 | NM_001130684:c.G769A;p.V257I            | 0.45 | P81  |
| chr17 | 7514746  | 7514746  | C | A | exonic | stopgain SNV TP53         | NM_001126115:c.G610T;p.E204X            | 0.02 | P81  |
| chr5  | 1.12E+08 | 1.12E+08 | C | T | exonic | stopgain SNV APC          | NM_001127511:c.C2572T;p.R858X           | 0.03 | P79  |
| chr6  | 1.53E+08 | 1.53E+08 | G | A | exonic | synonymous SNV SYNE1      | NM_033071:c.C10173T;p.L3391L            |      | P79  |
| chr9  | 32624721 | 32624721 | C | T | exonic | nonsynonymous SN\ TAF1L   | NM_153809:c.G857A;p.R286H               | 0.19 | P79  |
| chr17 | 7517846  | 7517846  | G | A | exonic | nonsynonymous SN\ TP53    | NM_001126115:c.C421T;p.R141C            | 0    | P79  |
| chr1  | 11096982 | 11096982 | A | C | exonic | nonsynonymous SN\ MTOR    | NM_004958:c.T7280G;p.L2427R             | 0    | P112 |
| chr5  | 1.12E+08 | 1.12E+08 | G | T | exonic | stopgain SNV APC          | NM_001127511:c.G3235T;p.E1079X          | 0    | P112 |
| chr6  | 1.53E+08 | 1.53E+08 | G | T | exonic | synonymous SNV SYNE1      | NM_033071:c.C1878A;p.G626G              |      | P112 |
| chr6  | 1.69E+08 | 1.69E+08 | C | T | exonic | nonsynonymous SN\ THBS2   | NM_003247:c.G520A;p.A174T               | 0.5  | P112 |
| chr12 | 25269828 | 25269828 | G | A | exonic | nonsynonymous SN\ KRAS    | NM_004985:c.C437T;p.A146V               | 0    | P112 |
| chr17 | 7518928  | 7518928  | C | T | exonic | nonsynonymous SN\ TP53    | NM_001126115:c.G250A;p.V84M             | 0    | P112 |
| chr2  | 1.16E+08 | 1.16E+08 | C | G | exonic | synonymous SNV DPP10      | NM_001004360:c.C516G;p.V172V            |      | P15  |
| chr5  | 82872193 | 82872193 | C | A | exonic | nonsynonymous SN\ VCAN    | NM_001164097:c.C4654A;p.P1552T          | 0    | P15  |
| chr5  | 1.38E+08 | 1.38E+08 | C | A | exonic | nonsynonymous SN\ CTNNA1  | NM_001903:c.C2353A;p.L785I              | 0.01 | P15  |
| chr5  | 1.41E+08 | 1.41E+08 | G | A | exonic | nonsynonymous SN\ PCDHB6  | NM_018939:c.G1591A;p.A531T              | 0    | P15  |
| chr6  | 1.12E+08 | 1.12E+08 | T | G | exonic | nonsynonymous SN\ FYN     | NM_153047:c.A1403C;p.N468T              | 1    | P15  |
| chr12 | 25289548 | 25289548 | C | T | exonic | nonsynonymous SN\ KRAS    | NM_004985:c.G38A;p.G13D rs112445441     | 0    | P15  |
| chr18 | 6938443  | 6938443  | T | C | exonic | nonsynonymous SN\ LAMA1   | NM_005559:c.A8669G;p.Q2890R             | 0.24 | P15  |
| chr7  | 91497179 | 91497179 | G | C | exonic | nonsynonymous SN\ AKAP9   | NM_005751:c.G4183C;p.D1395H             | 0.1  | P16  |
| chr16 | 60492732 | 60492732 | G | T | exonic | synonymous SNV CDH8       | NM_001796:c.C399A;p.T133T               |      | P16  |
| chr17 | 7519131  | 7519131  | C | T | exonic | nonsynonymous SN\ TP53    | NM_001126115:c.G128A;p.R43H rs28934578  | 0    | P16  |
| chr1  | 1.51E+08 | 1.51E+08 | C | T | exonic | nonsynonymous SN\ FLG     | NM_002016:c.G9748A;p.G3250S             | 0.2  | P13  |
| chr1  | 1.51E+08 | 1.51E+08 | G | C | exonic | nonsynonymous SN\ FLG     | NM_002016:c.C7694G;p.S2565C             | 0.02 | P13  |
| chr1  | 1.57E+08 | 1.57E+08 | T | G | exonic | nonsynonymous SN\ SPTA1   | NM_003126:c.A5077C;p.K1693Q rs857725    | 0.42 | P13  |
| chr1  | 1.58E+08 | 1.58E+08 | T | G | exonic | nonsynonymous SN\ ATP1A4  | NM_144699:c.T1622G;p.M541R rs16831482   | 0.28 | P13  |
| chr1  | 1.84E+08 | 1.84E+08 | C | G | exonic | nonsynonymous SN\ HMCN1   | NM_031935:c.C15732G;p.H5244Q rs75161007 | 0.84 | P13  |
| chr2  | 2.05E+08 | 2.05E+08 | G | A | exonic | synonymous SNV ICOS       | NM_012092:c.G591A;p.V197V rs55655222    |      | P13  |
| chr2  | 2.12E+08 | 2.12E+08 | T | C | exonic | synonymous SNV ERBB4      | NM_001042599:c.A3147G;p.V1048 rs3748962 |      | P13  |
| chr2  | 2.38E+08 | 2.38E+08 | C | T | exonic | synonymous SNV COL6A3     | NM_057166:c.G6276A;p.V2092V rs115757876 |      | P13  |
| chr3  | 41255831 | 41255831 | C | T | exonic | synonymous SNV CTNNB1     | NM_001098209:c.C2340T;p.D780C rs2293303 |      | P13  |
| chr3  | 1.44E+08 | 1.44E+08 | A | G | exonic | synonymous SNV ATR        | NM_001184:c.T5208C;p.Y1736Y rs2227931   |      | P13  |

|       |          |          |   |   |        |                   |          |                                 |             |          |
|-------|----------|----------|---|---|--------|-------------------|----------|---------------------------------|-------------|----------|
| chr3  | 1.44E+08 | 1.44E+08 | A | G | exonic | synonymous SNV    | ATR      | NM_001184:c.T1815C;p.D605D      | rs2227929   | P13      |
| chr3  | 1.44E+08 | 1.44E+08 | A | T | exonic | synonymous SNV    | ATR      | NM_001184:c.T1776A;p.G592G      | rs2227930   | P13      |
| chr3  | 1.44E+08 | 1.44E+08 | A | G | exonic | nonsynonymous SNV | ATR      | NM_001184:c.T632C;p.M211T       | rs2227928   | 0.15 P13 |
| chr4  | 25028381 | 25028381 | T | C | exonic | synonymous SNV    | ANAPC4   | NM_013367:c.T2121C;p.F707F      | rs9174      | P13      |
| chr4  | 25029006 | 25029006 | G | T | exonic | synonymous SNV    | ANAPC4   | NM_013367:c.G2331T;p.S777S      | rs3214036   | P13      |
| chr4  | 1.27E+08 | 1.27E+08 | T | C | exonic | synonymous SNV    | FAT4     | NM_024582:c.T5883C;p.S1961S     | rs117016099 | P13      |
| chr4  | 1.27E+08 | 1.27E+08 | G | A | exonic | nonsynonymous SNV | FAT4     | NM_024582:c.G8476A;p.D2826N     | rs12508222  | 1 P13    |
| chr4  | 1.27E+08 | 1.27E+08 | G | A | exonic | synonymous SNV    | FAT4     | NM_024582:c.G12813A;p.V4271V    | rs6824160   | P13      |
| chr4  | 1.55E+08 | 1.55E+08 | C | T | exonic | nonsynonymous SNV | DCHS2    | NM_017639:c.G4783A;p.E1595K     | rs28561984  | 1 P13    |
| chr4  | 1.55E+08 | 1.55E+08 | A | G | exonic | synonymous SNV    | DCHS2    | NM_017639:c.T4740C;p.D1580D     | rs17031387  | P13      |
| chr4  | 1.55E+08 | 1.55E+08 | G | C | exonic | nonsynonymous SNV | DCHS2    | NM_017639:c.C4439G;p.T1480R     | rs17031394  | 0.55 P13 |
| chr5  | 7855363  | 7855363  | C | T | exonic | synonymous SNV    | ADCY2    | NM_020546:c.C2661T;p.C887C      | rs2290910   | P13      |
| chr5  | 24545524 | 24545524 | G | C | exonic | synonymous SNV    | CDH10    | NM_006727:c.C1164G;p.S388S      |             | P13      |
| chr5  | 27024085 | 27024085 | G | A | exonic | nonsynonymous SNV | CDH9     | NM_016279:c.C113T;p.A38V        | rs2288466   | 0.28 P13 |
| chr5  | 27024181 | 27024181 | T | C | exonic | nonsynonymous SNV | CDH9     | NM_016279:c.A17G;p.Y6C          | rs2288467   | 0.08 P13 |
| chr5  | 82851164 | 82851164 | G | A | exonic | nonsynonymous SNV | VCAN     | NM_001164098:c.G1283A;p.G428T   | rs2287926   | 0 P13    |
| chr5  | 82871531 | 82871531 | C | T | exonic | nonsynonymous SNV | VCAN     | NM_001164097:c.C3992T;p.T1331I  |             | 0 P13    |
| chr5  | 1.12E+08 | 1.12E+08 | T | C | exonic | synonymous SNV    | APC      | NM_001127511:c.T1404C;p.Y468Y   | rs2229992   | P13      |
| chr5  | 1.4E+08  | 1.4E+08  | A | G | exonic | nonsynonymous SNV | PCDHA1   | NM_018900:c.A2195G;p.Y732C      | rs2240696   | 1 P13    |
| chr5  | 1.4E+08  | 1.4E+08  | G | T | exonic | nonsynonymous SNV | PCDHA1   | NM_018900:c.G2276T;p.C759F      | rs2240695   | 0 P13    |
| chr5  | 1.4E+08  | 1.4E+08  | T | G | exonic | synonymous SNV    | PCDHA4   | NM_018907:c.T1611G;p.A537A      | rs2337987   | P13      |
| chr5  | 1.4E+08  | 1.4E+08  | A | G | exonic | synonymous SNV    | PCDHA4   | NM_018907:c.A1629G;p.P543P      | rs2879086   | P13      |
| chr5  | 1.4E+08  | 1.4E+08  | G | C | exonic | synonymous SNV    | PCDHA4   | NM_018907:c.G1803C;p.S601S      | rs2879087   | P13      |
| chr5  | 1.4E+08  | 1.4E+08  | A | C | exonic | nonsynonymous SNV | PCDHA6   | NM_018909:c.A1208C;p.N403T      | rs3733706   | 0.01 P13 |
| chr5  | 1.4E+08  | 1.4E+08  | T | G | exonic | synonymous SNV    | PCDHA6   | NM_018909:c.T1791G;p.V597V      | rs7710794   | P13      |
| chr5  | 1.51E+08 | 1.51E+08 | C | T | exonic | nonsynonymous SNV | FAT2     | NM_001447:c.G4711A;p.G1571S     | rs10044879  | 0.1 P13  |
| chr5  | 1.51E+08 | 1.51E+08 | G | A | exonic | nonsynonymous SNV | FAT2     | NM_001447:c.C3491T;p.P1164L     | rs2304053   | 0.02 P13 |
| chr5  | 1.51E+08 | 1.51E+08 | G | A | exonic | synonymous SNV    | FAT2     | NM_001447:c.C3375T;p.I1125I     | rs2304054   | P13      |
| chr5  | 1.51E+08 | 1.51E+08 | C | T | exonic | nonsynonymous SNV | FAT2     | NM_001447:c.G3010A;p.G1004S     | rs3734055   | 0.63 P13 |
| chr5  | 1.51E+08 | 1.51E+08 | G | A | exonic | synonymous SNV    | FAT2     | NM_001447:c.C2794T;p.L932L      | rs10085060  | P13      |
| chr5  | 1.51E+08 | 1.51E+08 | A | G | exonic | synonymous SNV    | FAT2     | NM_001447:c.T2631C;p.V877V      | rs3734057   | P13      |
| chr5  | 1.51E+08 | 1.51E+08 | C | T | exonic | synonymous SNV    | FAT2     | NM_001447:c.G2562A;p.R854R      | rs3734058   | P13      |
| chr5  | 1.51E+08 | 1.51E+08 | G | A | exonic | synonymous SNV    | FAT2     | NM_001447:c.C2361T;p.I787I      | rs3734059   | P13      |
| chr5  | 1.51E+08 | 1.51E+08 | A | G | exonic | nonsynonymous SNV | FAT2     | NM_001447:c.T2057C;p.F686S      | rs9324700   | 0.87 P13 |
| chr5  | 1.51E+08 | 1.51E+08 | G | A | exonic | nonsynonymous SNV | FAT2     | NM_001447:c.C1720T;p.R574C      | rs1432862   | 0.08 P13 |
| chr5  | 1.51E+08 | 1.51E+08 | G | A | exonic | synonymous SNV    | FAT2     | NM_001447:c.C1527T;p.P509P      | rs1465690   | P13      |
| chr5  | 1.51E+08 | 1.51E+08 | C | T | exonic | synonymous SNV    | FAT2     | NM_001447:c.G774A;p.S258S       | rs3734060   | P13      |
| chr5  | 1.69E+08 | 1.69E+08 | C | A | exonic | synonymous SNV    | DOCK2    | NM_004946:c.C1212A;p.T404T      | rs2112703   | P13      |
| chr6  | 12404241 | 12404241 | G | T | exonic | nonsynonymous SNV | EDN1     | NM_001168319:c.G591T;p.K197N    | rs5370      | 0.02 P13 |
| chr6  | 1.3E+08  | 1.3E+08  | A | G | exonic | synonymous SNV    | LAMA2    | NM_000426:c.A2799G;p.Q933Q      | rs1027199   | P13      |
| chr6  | 1.3E+08  | 1.3E+08  | C | T | exonic | nonsynonymous SNV | LAMA2    | NM_001079823:c.C7748T;p.A2583   | rs6569605   | 0.6 P13  |
| chr6  | 1.3E+08  | 1.3E+08  | G | C | exonic | synonymous SNV    | LAMA2    | NM_001079823:c.G7818C;p.V260F   | rs6569606   | P13      |
| chr6  | 1.53E+08 | 1.53E+08 | C | G | exonic | synonymous SNV    | SYNE1    | NM_033071:c.G13848C;p.L4616L    | rs3734365   | P13      |
| chr7  | 47935452 | 47935452 | C | A | exonic | nonsynonymous SNV | PKD1L1   | NM_138295:c.G934T;p.V312F       | rs2686817   | 0 P13    |
| chr7  | 93891587 | 93891587 | C | A | exonic | nonsynonymous SNV | COL1A2   | NM_000089:c.C2569A;p.P857T      | rs1800248   | 0.17 P13 |
| chr7  | 93894285 | 93894285 | C | T | exonic | synonymous SNV    | COL1A2   | NM_000089:c.C3135T;p.G1045G     | rs1800248   | P13      |
| chr7  | 1E+08    | 1E+08    | C | T | exonic | nonsynonymous SNV | MUC17    | NM_001040105:c.C10994T;p.P3665L |             | P13      |
| chr7  | 1.03E+08 | 1.03E+08 | T | C | exonic | synonymous SNV    | RELN     | NM_005045:c.A1776G;p.E592E      | rs2072403   | P13      |
| chr7  | 1.52E+08 | 1.52E+08 | C | T | exonic | synonymous SNV    | MLL3     | NM_170606:c.G8040A;p.Q2680Q     | rs10252263  | P13      |
| chr8  | 41910669 | 41910669 | A | C | exonic | stopgain SNV      | MYST3    | NM_006766:c.T4226G;p.L1409X     |             | 0.42 P13 |
| chr9  | 1.23E+08 | 1.23E+08 | C | T | exonic | nonsynonymous SNV | TRAF1    | NM_001190947:c.G218A;p.R73H     |             | 0.2 P13  |
| chr10 | 95269496 | 95269496 | A | T | exonic | nonsynonymous SNV | CEP55    | NM_001127182:c.A1133T;p.H378L   | rs2293277   | 0.13 P13 |
| chr10 | 1.16E+08 | 1.16E+08 | T | A | exonic | nonsynonymous SNV | C10orf81 | NM_001193435:c.T205A;p.F69I     | rs41292632  | 0.16 P13 |

|       |          |          |   |   |        |                   |          |                                |             |          |
|-------|----------|----------|---|---|--------|-------------------|----------|--------------------------------|-------------|----------|
| chr10 | 1.16E+08 | 1.16E+08 | T | C | exonic | synonymous SNV    | C10orf81 | NM_001193435:c.T759C:p.A253A   | rs3750901   | P13      |
| chr10 | 1.16E+08 | 1.16E+08 | T | C | exonic | synonymous SNV    | C10orf81 | NM_001193435:c.T972C:p.A324A   | rs11196483  | P13      |
| chr11 | 35174945 | 35174945 | G | T | exonic | nonsynonymous SNV | CD44     | NM_000610:c.G744T:p.L248F      |             | 0.29 P13 |
| chr11 | 1.06E+08 | 1.06E+08 | G | A | exonic | synonymous SNV    | GUCY1A2  | NM_000855:c.C2169T:p.G723G     |             | P13      |
| chr11 | 1.19E+08 | 1.19E+08 | G | C | exonic | nonsynonymous SNV | CBL      | NM_005188:c.G1760C:p.G587A     |             | 0.36 P13 |
| chr12 | 6036359  | 6036359  | C | T | exonic | nonsynonymous SNV | VWF      | NM_000552:c.G1870A:p.G624S     |             | 1 P13    |
| chr12 | 6037457  | 6037457  | A | G | exonic | synonymous SNV    | VWF      | NM_000552:c.T1548C:p.Y516Y     | rs1800379   | P13      |
| chr12 | 7179223  | 7179223  | C | T | exonic | synonymous SNV    | CLSTN3   | NM_014718:c.C417T:p.N139N      | rs34933247  | P13      |
| chr12 | 25254044 | 25254044 | A | G | exonic | synonymous SNV    | KRAS     | NM_004985:c.T519C:p.D173D      | rs1137282   | P13      |
| chr12 | 46812979 | 46812979 | G | A | exonic | nonsynonymous SNV | PFKM     | NM_001166688:c.G299A:p.R100Q   | rs2228500   | 0.42 P13 |
| chr12 | 1.08E+08 | 1.08E+08 | C | T | exonic | synonymous SNV    | ACACB    | NM_001093:c.C525T:p.S175S      | rs2878960   | P13      |
| chr12 | 1.08E+08 | 1.08E+08 | C | T | exonic | synonymous SNV    | ACACB    | NM_001093:c.C6204T:p.H2068H    | rs3742023   | P13      |
| chr12 | 23907297 | 23907297 | G | T | exonic | nonsynonymous SNV | PARP4    | NM_006437:c.C3982A:p.P1328T    | rs1050112   | 0.64 P13 |
| chr13 | 23907441 | 23907441 | C | G | exonic | nonsynonymous SNV | PARP4    | NM_006437:c.G3838C:p.G1280R    | rs13428     | 0.09 P13 |
| chr13 | 23907485 | 23907485 | C | G | exonic | nonsynonymous SNV | PARP4    | NM_006437:c.G3794C:p.G1265A    | rs1050110   | 1 P13    |
| chr13 | 23927295 | 23927295 | C | T | exonic | nonsynonymous SNV | PARP4    | NM_006437:c.G2618A:p.S873N     | rs7140044   | 0.53 P13 |
| chr13 | 23950261 | 23950261 | C | T | exonic | synonymous SNV    | PARP4    | NM_006437:c.G1602A:p.S534S     | rs4770696   | P13      |
| chr13 | 23973859 | 23973859 | C | T | exonic | synonymous SNV    | PARP4    | NM_006437:c.G246A:p.R82R       | rs1539096   | P13      |
| chr14 | 90483547 | 90483547 | G | A | exonic | synonymous SNV    | RPS6KA5  | NM_004755:c.C495T:p.L165L      | rs56369401  | P13      |
| chr17 | 3595963  | 3595963  | G | A | exonic | synonymous SNV    | ITGAE    | NM_002208:c.C2163T:p.R721R     | rs1183610   | P13      |
| chr17 | 3603908  | 3603908  | C | T | exonic | nonsynonymous SNV | ITGAE    | NM_002208:c.G1445A:p.R482Q     | rs2272606   | 0.02 P13 |
| chr17 | 3603924  | 3603924  | T | C | exonic | nonsynonymous SNV | ITGAE    | NM_002208:c.A1429G:p.I477V     | rs220479    | 1 P13    |
| chr17 | 7519267  | 7519267  | G | C | exonic | nonsynonymous SNV | TP53     | NM_000546:c.C388G:p.L130V      |             | 0 P13    |
| chr17 | 10236901 | 10236901 | T | C | exonic | nonsynonymous SNV | MYH8     | NM_002472:c.A5435G:p.K1812R    |             | 0.03 P13 |
| chr17 | 26532901 | 26532901 | G | A | exonic | synonymous SNV    | NF1      | NM_000267:c.G702A:p.L234L      | rs1801052   | P13      |
| chr17 | 38476620 | 38476620 | T | C | exonic | nonsynonymous SNV | BRCA1    | NM_007297:c.A4696G:p.S1566G    | rs1799966   | 0.1 P13  |
| chr17 | 38487996 | 38487996 | A | G | exonic | synonymous SNV    | BRCA1    | NM_007297:c.T4167C:p.S1389S    | rs1060915   | P13      |
| chr17 | 38497526 | 38497526 | T | C | exonic | nonsynonymous SNV | BRCA1    | NM_007297:c.A3407G:p.K1136R    | rs16942     | 1 P13    |
| chr17 | 38498462 | 38498462 | G | A | exonic | nonsynonymous SNV | BRCA1    | NM_007297:c.C2471T:p.P824L     | rs799917    | 1 P13    |
| chr17 | 38498763 | 38498763 | A | G | exonic | synonymous SNV    | BRCA1    | NM_007297:c.T2170C:p.L724L     | rs16940     | P13      |
| chr17 | 38498992 | 38498992 | G | A | exonic | synonymous SNV    | BRCA1    | NM_007297:c.C1941T:p.S647S     | rs1799949   | P13      |
| chr17 | 43090974 | 43090974 | G | A | exonic | synonymous SNV    | KPNB1    | NM_002265:c.G585A:p.T195T      | rs1136613   | P13      |
| chr17 | 43105467 | 43105467 | T | C | exonic | synonymous SNV    | KPNB1    | NM_002265:c.T1632C:p.Y544Y     | rs1136614   | P13      |
| chr17 | 71256626 | 71256626 | G | A | exonic | nonsynonymous SNV | ITGB4    | NM_001005619:c.G3221A:p.R1074H |             | 0 P13    |
| chr17 | 75916752 | 75916752 | C | A | exonic | nonsynonymous SNV | RNF213   | NM_020914:c.C3544A:p.Q1182K    | rs8082521   | P13      |
| chr18 | 6989628  | 6989628  | T | C | exonic | synonymous SNV    | LAMA1    | NM_005559:c.A4479G:p.S1493S    | rs625106    | P13      |
| chr18 | 7007322  | 7007322  | A | G | exonic | synonymous SNV    | LAMA1    | NM_005559:c.T2763C:p.C921C     | rs539713    | P13      |
| chr18 | 7013371  | 7013371  | A | G | exonic | synonymous SNV    | LAMA1    | NM_005559:c.T2493C:p.C831C     | rs684634    | P13      |
| chr18 | 7023037  | 7023037  | G | A | exonic | synonymous SNV    | LAMA1    | NM_005559:c.C2109T:p.A703A     | rs621993    | P13      |
| chr18 | 7024508  | 7024508  | T | G | exonic | nonsynonymous SNV | LAMA1    | NM_005559:c.A2021C:p.N674T     | rs566655    | 0.97 P13 |
| chr18 | 59321701 | 59321701 | T | C | exonic | synonymous SNV    | SERPINB5 | NM_002639:c.T894C:p.S298S      | rs1455556   | P13      |
| chr18 | 59321762 | 59321762 | A | G | exonic | nonsynonymous SNV | SERPINB5 | NM_002639:c.A955G:p.I319V      | rs1455555   | P13      |
| chr18 | 61662156 | 61662156 | T | C | exonic | synonymous SNV    | CDH7     | NM_004361:c.T1110C:p.D370D     | rs2306675   | P13      |
| chr19 | 43640609 | 43640609 | C | T | exonic | synonymous SNV    | RYR1     | NM_000540:c.C2004T:p.D668D     | rs78835441  | P13      |
| chr19 | 48103070 | 48103070 | C | G | exonic | nonsynonymous SNV | PSG6     | NM_001031850:c.G1084C:p.E362C  | rs74994349  | 0.96 P13 |
| chr19 | 48211110 | 48211110 | A | G | exonic | nonsynonymous SNV | PSG11    | NM_001113410:c.T596C:p.I199T   | rs111493043 | 0.4 P13  |
| chr19 | 48267768 | 48267768 | G | A | exonic | synonymous SNV    | PSG2     | NM_031246:c.C888T:p.S296S      | rs1064935   | P13      |
| chr19 | 48271519 | 48271519 | T | A | exonic | nonsynonymous SNV | PSG2     | NM_031246:c.A536T:p.Q179L      | rs1058086   | 1 P13    |
| chr19 | 48465414 | 48465414 | G | A | exonic | nonsynonymous SNV | PSG9     | NM_002784:c.C10T:p.L4F         | rs73037706  | 0.06 P13 |
| chr19 | 60041076 | 60041076 | G | A | exonic | nonsynonymous SNV | KIR2DS4  | NM_012314:c.G304A:p.G102S      | rs115093949 | 0.07 P13 |
| chr19 | 61116344 | 61116344 | G | A | exonic | synonymous SNV    | NLRP13   | NM_176810:c.C651T:p.R217R      | rs731338    | P13      |
| chr19 | 61135331 | 61135331 | C | T | exonic | synonymous SNV    | NLRP13   | NM_176810:c.G159A:p.P53P       | rs12610617  | P13      |
| chr20 | 23369101 | 23369101 | G | A | exonic | nonsynonymous SNV | CSTL1    | NM_138283:c.G197A:p.R66K       | rs17757442  | 0.58 P13 |

|       |          |          |   |   |                 |                   |         |                                |            |      |     |
|-------|----------|----------|---|---|-----------------|-------------------|---------|--------------------------------|------------|------|-----|
| chr20 | 23372638 | 23372638 | C | T | exonic          | nonsynonymous SNV | CSTL1   | NM_138283:c.C287T;p.T96M       | rs3746737  | 0.01 | P13 |
| chr22 | 21768191 | 21768191 | C | T | exonic          | synonymous SNV    | GNAZ    | NM_002073:c.C309T;p.D103D      | rs1805058  |      | P13 |
| chr22 | 39877954 | 39877954 | A | G | exonic          | nonsynonymous SNV | EP300   | NM_001429:c.A2989G;p.I997V     | rs20551    | 0.29 | P13 |
| chr22 | 39880985 | 39880985 | T | A | exonic          | synonymous SNV    | EP300   | NM_001429:c.T3183A;p.T1061T    | rs20552    |      | P13 |
| chrX  | 19343227 | 19343227 | C | T | exonic          | synonymous SNV    | MAP3K15 | NM_001001671:c.G1509A;p.S503S  | rs56125741 |      | P13 |
| chrX  | 1.52E+08 | 1.52E+08 | G | C | exonic          | synonymous SNV    | ATP2B3  | NM_001001344:c.G2592C;p.V864V  | rs2269415  |      | P13 |
| chr17 | 7519109  | 7519109  | G | T | exonic          | stopgain SNV      | TP53    | NM_001126115:c.C150A;p.C50X    |            | 0.01 | P14 |
| chr20 | 44115106 | 44115106 | C | T | exonic          | synonymous SNV    | SLC12A5 | NM_001134771:c.C2550T;p.D850D  |            |      | P14 |
| chr5  | 1.41E+08 | 1.41E+08 | G | A | exonic          | nonsynonymous SNV | PCDHB14 | NM_018934:c.G2369A;p.R790Q     |            | 0.15 | P11 |
| chr12 | 25289551 | 25289551 | C | T | exonic          | nonsynonymous SNV | KRAS    | NM_004985:c.G35A;p.G12D        |            | 0    | P11 |
| chr13 | 66700250 | 66700250 | C | A | exonic          | nonsynonymous SNV | PCDH9   | NM_020403:c.G324T;p.E108D      |            | 0.16 | P11 |
| chr17 | 7517863  | 7517863  | C | G | exonic          | nonsynonymous SNV | TP53    | NM_001126115:c.G404C;p.R135P   |            | 0    | P11 |
| chrX  | 18879229 | 18879229 | G | A | exonic          | nonsynonymous SNV | PHKA2   | NM_000292:c.C368T;p.T123M      |            | 0.04 | P11 |
| chrX  | 1.38E+08 | 1.38E+08 | C | T | exonic          | nonsynonymous SNV | FGF13   | NM_001139500:c.G61A;p.A21T     |            | 0    | P11 |
| chr1  | 1.57E+08 | 1.57E+08 | C | A | exonic          | nonsynonymous SNV | SPTA1   | NM_003126:c.G6093T;p.L2031F    |            | 0.01 | P12 |
| chr1  | 1.58E+08 | 1.58E+08 | A | G | exonic          | synonymous SNV    | ATP1A4  | NM_144699:c.A69G;p.K23K        | rs77332724 |      | P12 |
| chr1  | 1.58E+08 | 1.58E+08 | G | A | exonic          | nonsynonymous SNV | ATP1A4  | NM_144699:c.G788A;p.R263Q      | rs76528638 | 0.11 | P12 |
| chr1  | 1.58E+08 | 1.58E+08 | C | T | exonic          | synonymous SNV    | ATP1A4  | NM_144699:c.C1038T;p.A346A     | rs11265338 |      | P12 |
| chr1  | 2.14E+08 | 2.14E+08 | C | T | exonic          | nonsynonymous SNV | USH2A   | NM_206933:c.G15547A;p.A5183T   |            | 0.1  | P12 |
| chr1  | 2.14E+08 | 2.14E+08 | A | C | exonic          | nonsynonymous SNV | USH2A   | NM_007123:c.T3364G;p.S1122A    |            | 0.27 | P12 |
| chr1  | 2.15E+08 | 2.15E+08 | G | A | exonic          | synonymous SNV    | USH2A   | NM_007123:c.C1419T;p.T473T     | rs1805050  |      | P12 |
| chr1  | 2.46E+08 | 2.46E+08 | T | C | exonic          | synonymous SNV    | OR2M3   | NM_001004689:c.T423C;p.C141C   | rs12562957 |      | P12 |
| chr1  | 2.47E+08 | 2.47E+08 | C | T | exonic          | synonymous SNV    | OR2M7   | NM_001004691:c.G855A;p.L285L   | rs4451579  |      | P12 |
| chr2  | 1.16E+08 | 1.16E+08 | A | T | exonic          | synonymous SNV    | DPP10   | NM_001178037:c.A27T;p.G9G      |            |      | P12 |
| chr2  | 1.7E+08  | 1.7E+08  | A | G | exonic          | synonymous SNV    | LRP2    | NM_004525:c.T4875C;p.C1625C    | rs2229267  |      | P12 |
| chr2  | 1.7E+08  | 1.7E+08  | T | C | exonic          | synonymous SNV    | LRP2    | NM_004525:c.A3660G;p.A1220A    | rs831042   |      | P12 |
| chr2  | 1.7E+08  | 1.7E+08  | T | C | exonic          | synonymous SNV    | LRP2    | NM_004525:c.A3069G;p.T1023T    | rs831043   |      | P12 |
| chr2  | 1.7E+08  | 1.7E+08  | G | T | exonic          | synonymous SNV    | LRP2    | NM_004525:c.C3054A;p.T1018T    | rs2075249  |      | P12 |
| chr2  | 1.7E+08  | 1.7E+08  | T | C | exonic          | synonymous SNV    | LRP2    | NM_004525:c.A2460G;p.T820T     | rs2241190  |      | P12 |
| chr2  | 1.7E+08  | 1.7E+08  | G | A | exonic          | synonymous SNV    | LRP2    | NM_004525:c.C639T;p.D213D      | rs2229266  |      | P12 |
| chr2  | 1.9E+08  | 1.9E+08  | G | A | exonic          | nonsynonymous SNV | COL3A1  | NM_000090:c.G187A;p.D63N       |            | 0    | P12 |
| chr2  | 1.9E+08  | 1.9E+08  | G | A | exonic          | nonsynonymous SNV | COL3A1  | NM_000090:c.G2092A;p.A698T     | rs1800255  | 0.17 | P12 |
| chr2  | 2.38E+08 | 2.38E+08 | C | A | exonic          | synonymous SNV    | COL6A3  | NM_057166:c.G2712T;p.G904G     | rs2645774  |      | P12 |
| chr2  | 2.38E+08 | 2.38E+08 | A | G | exonic          | synonymous SNV    | COL6A3  | NM_057166:c.T2490C;p.I830I     | rs2646260  |      | P12 |
| chr3  | 8750661  | 8750661  | C | T | exonic          | synonymous SNV    | CAV3    | NM_001234:c.C99T;p.N33N        | rs1008642  |      | P12 |
| chr3  | 10388601 | 10388601 | G | A | exonic          | synonymous SNV    | ATP2B2  | NM_001683:c.C1416T;p.G472G     | rs2289273  |      | P12 |
| chr3  | 10388715 | 10388715 | G | A | exonic          | synonymous SNV    | ATP2B2  | NM_001683:c.C1302T;p.N434N     | rs2289274  |      | P12 |
| chr3  | 13871285 | 13871285 | C | T | exonic          | synonymous SNV    | WNT7A   | NM_004625:c.G315A;p.A105A      | rs12639607 |      | P12 |
| chr3  | 58092764 | 58092764 | G | A | exonic          | synonymous SNV    | FLNB    | NM_001164317:c.G4461A;p.P1487  | rs60183346 |      | P12 |
| chr3  | 1.25E+08 | 1.25E+08 | T | C | splicing        |                   | MYLK    |                                | rs6438804  |      | P12 |
| chr3  | 1.25E+08 | 1.25E+08 | C | T | exonic;splicing | nonsynonymous SNV | MYLK    | NM_053031:c.G88A;p.D30N        |            | 0.23 | P12 |
| chr3  | 1.25E+08 | 1.25E+08 | A | G | exonic          | synonymous SNV    | MYLK    | NM_053026:c.T4635C;p.N1545N    | rs820463   |      | P12 |
| chr3  | 1.42E+08 | 1.42E+08 | C | T | exonic          | synonymous SNV    | CLSTN2  | NM_022131:c.C2283T;p.S761S     | rs11714465 |      | P12 |
| chr4  | 25026207 | 25026207 | T | A | exonic          | synonymous SNV    | ANAPC4  | NM_013367:c.T1848A;p.I616I     | rs3214035  |      | P12 |
| chr4  | 1.26E+08 | 1.26E+08 | A | T | exonic          | nonsynonymous SNV | FAT4    | NM_024582:c.A1358T;p.Q453L     | rs6847454  |      | P12 |
| chr4  | 1.26E+08 | 1.26E+08 | T | C | exonic          | synonymous SNV    | FAT4    | NM_024582:c.T2944C;p.L982L     | rs2940779  |      | P12 |
| chr4  | 1.26E+08 | 1.26E+08 | C | T | exonic          | synonymous SNV    | FAT4    | NM_024582:c.C4305T;p.I1435I    | rs2710555  |      | P12 |
| chr4  | 1.55E+08 | 1.55E+08 | G | A | exonic          | nonsynonymous SNV | DCHS2   | NM_017639:c.C3614T;p.S1205L    | rs11935573 | 0.01 | P12 |
| chr4  | 1.55E+08 | 1.55E+08 | C | A | exonic          | nonsynonymous SNV | DCHS2   | NM_001142552:c.G3419T;p.G1140V |            | 0.02 | P12 |
| chr4  | 1.55E+08 | 1.55E+08 | A | G | exonic          | synonymous SNV    | DCHS2   | NM_001142552:c.T2556C;p.G852C  | rs6858157  |      | P12 |
| chr4  | 1.56E+08 | 1.56E+08 | T | C | exonic          | nonsynonymous SNV | DCHS2   | NM_001142552:c.A1858G;p.T620A  | rs72731014 | 0.58 | P12 |
| chr4  | 1.56E+08 | 1.56E+08 | G | A | exonic          | nonsynonymous SNV | DCHS2   | NM_001142552:c.C1841T;p.A614V  | rs55810732 | 0.35 | P12 |
| chr4  | 1.56E+08 | 1.56E+08 | G | C | exonic          | nonsynonymous SNV | DCHS2   | NM_001142552:c.C1777G;p.Q593f  | rs72731016 | 1    | P12 |

|      |          |          |   |   |                 |                   |         |                                |             |      |     |
|------|----------|----------|---|---|-----------------|-------------------|---------|--------------------------------|-------------|------|-----|
| chr4 | 1.56E+08 | 1.56E+08 | C | T | exonic          | nonsynonymous SN\ | DCHS2   | NM_001142552:c.G44A;p.R15Q     | rs13149269  | 0.49 | P12 |
| chr5 | 1134702  | 1134702  | A | G | exonic          | synonymous SNV    | SLC12A7 | NM_006598:c.T1287C;p.P429P     | rs6865765   |      | P12 |
| chr5 | 7819894  | 7819894  | G | A | exonic          | nonsynonymous SN\ | ADCY2   | NM_020546:c.G2189A;p.R730H     |             |      | P12 |
| chr5 | 82821950 | 82821950 | T | C | exonic          | synonymous SNV    | VCAN    | NM_001126336:c.T348C;p.T116T   | rs12332199  |      | P12 |
| chr5 | 82825403 | 82825403 | A | G | exonic          | synonymous SNV    | VCAN    | NM_001126336:c.A645G;p.V215V   | rs4470745   |      | P12 |
| chr5 | 82843752 | 82843752 | G | T | exonic          | nonsynonymous SN\ | VCAN    | NM_001126336:c.G823T;p.A275S   |             | 0.02 | P12 |
| chr5 | 82868901 | 82868901 | G | A | exonic          | synonymous SNV    | VCAN    | NM_001164097:c.G1362A;p.Q454C  | rs2548541   |      | P12 |
| chr5 | 82869125 | 82869125 | A | G | exonic          | nonsynonymous SN\ | VCAN    | NM_001164097:c.A1586G;p.K529F  | rs309559    | 0    | P12 |
| chr5 | 82869147 | 82869147 | A | G | exonic          | synonymous SNV    | VCAN    | NM_001164097:c.A1608G;p.T536T  | rs16900528  |      | P12 |
| chr5 | 82870386 | 82870386 | T | C | exonic          | synonymous SNV    | VCAN    | NM_001164097:c.T2847C;p.G949C  | rs309557    |      | P12 |
| chr5 | 82871301 | 82871301 | A | G | exonic          | synonymous SNV    | VCAN    | NM_001164097:c.A3762G;p.R1254  | rs160279    |      | P12 |
| chr5 | 82871480 | 82871480 | T | A | exonic          | nonsynonymous SN\ | VCAN    | NM_001164097:c.T3941A;p.F1314  | rs160278    | 0    | P12 |
| chr5 | 82873141 | 82873141 | G | A | exonic          | nonsynonymous SN\ | VCAN    | NM_001164097:c.G5602A;p.G1868S |             | 0    | P12 |
| chr5 | 82877146 | 82877146 | C | T | exonic          | synonymous SNV    | VCAN    | NM_001126336:c.C1077T;p.N359N  |             |      | P12 |
| chr5 | 1.4E+08  | 1.4E+08  | A | G | exonic          | nonsynonymous SN\ | PCDHA10 | NM_018901:c.A1915G;p.T639A     | rs630162    |      | P12 |
| chr5 | 1.4E+08  | 1.4E+08  | T | C | exonic          | nonsynonymous SN\ | PCDHA12 | NM_018903:c.T2351C;p.L784S     |             |      | P12 |
| chr5 | 1.51E+08 | 1.51E+08 | C | T | exonic          | synonymous SNV    | FAT2    | NM_001447:c.G10350A;p.L3450L   | rs36092108  |      | P12 |
| chr5 | 1.51E+08 | 1.51E+08 | C | G | exonic          | nonsynonymous SN\ | FAT2    | NM_001447:c.G4960C;p.D1654H    |             | 0.05 | P12 |
| chr5 | 1.51E+08 | 1.51E+08 | C | T | exonic          | nonsynonymous SN\ | FAT2    | NM_001447:c.G4384A;p.V1462M    | rs2278371   | 0.18 | P12 |
| chr5 | 1.69E+08 | 1.69E+08 | T | C | exonic          | synonymous SNV    | DOCK2   | NM_004946:c.T4896C;p.R1632R    | rs1045168   |      | P12 |
| chr6 | 90699079 | 90699079 | G | A | exonic          | synonymous SNV    | BACH2   | NM_001170794:c.C2295T;p.N765N  | rs3798789   |      | P12 |
| chr6 | 90717040 | 90717040 | T | C | exonic          | synonymous SNV    | BACH2   | NM_001170794:c.A1506G;p.V502V  | rs9451298   |      | P12 |
| chr6 | 1.3E+08  | 1.3E+08  | G | A | exonic;splicing | nonsynonymous SN\ | LAMA2   | NM_000426:c.G3412A;p.V1138M    | rs2306942   | 0.09 | P12 |
| chr6 | 1.3E+08  | 1.3E+08  | G | A | exonic          | synonymous SNV    | LAMA2   | NM_001079823:c.G7833A;p.P2611  | rs2229850   |      | P12 |
| chr6 | 1.3E+08  | 1.3E+08  | A | G | exonic          | nonsynonymous SN\ | LAMA2   | NM_001079823:c.A7894G;p.T2632  | rs2244008   | 0.24 | P12 |
| chr6 | 1.46E+08 | 1.46E+08 | C | T | exonic          | synonymous SNV    | GRM1    | NM_000838:c.C624T;p.D208D      | rs112670841 |      | P12 |
| chr6 | 1.53E+08 | 1.53E+08 | T | C | exonic          | synonymous SNV    | SYNE1   | NM_133650:c.A1479G;p.E493E     | rs2747662   |      | P12 |
| chr6 | 1.53E+08 | 1.53E+08 | C | G | exonic          | nonsynonymous SN\ | SYNE1   | NM_133650:c.G1454C;p.G485A     | rs2252755   | 0.52 | P12 |
| chr6 | 1.53E+08 | 1.53E+08 | C | T | exonic          | synonymous SNV    | SYNE1   | NM_133650:c.G1311A;p.P437P     | rs2252748   |      | P12 |
| chr6 | 1.53E+08 | 1.53E+08 | G | A | exonic          | nonsynonymous SN\ | SYNE1   | NM_033071:c.C16064T;p.T5355M   | rs2306914   | 0.08 | P12 |
| chr6 | 1.53E+08 | 1.53E+08 | G | C | exonic          | synonymous SNV    | SYNE1   | NM_033071:c.C15384G;p.A5128A   | rs9383987   |      | P12 |
| chr6 | 1.53E+08 | 1.53E+08 | A | G | exonic          | synonymous SNV    | SYNE1   | NM_182961:c.T10866C;p.S3622S   | rs9397102   |      | P12 |
| chr6 | 1.53E+08 | 1.53E+08 | G | T | exonic          | synonymous SNV    | SYNE1   | NM_033071:c.C10212A;p.G3404G   | rs4407724   |      | P12 |
| chr6 | 1.53E+08 | 1.53E+08 | T | C | exonic          | synonymous SNV    | SYNE1   | NM_033071:c.A9516G;p.E3172E    | rs6913579   |      | P12 |
| chr6 | 1.69E+08 | 1.69E+08 | A | G | exonic          | synonymous SNV    | THBS2   | NM_003247:c.T3360C;p.T1120T    | rs1132742   |      | P12 |
| chr6 | 1.69E+08 | 1.69E+08 | G | A | exonic          | synonymous SNV    | THBS2   | NM_003247:c.C3075T;p.A1025A    | rs9505895   |      | P12 |
| chr7 | 93879873 | 93879873 | A | C | exonic          | synonymous SNV    | COL1A2  | NM_000089:c.A1446C;p.P482P     | rs412777    |      | P12 |
| chr7 | 1.03E+08 | 1.03E+08 | A | G | exonic          | synonymous SNV    | RELN    | NM_005045:c.T6702C;p.C2234C    | rs2075043   |      | P12 |
| chr7 | 1.52E+08 | 1.52E+08 | G | A | exonic          | synonymous SNV    | MLL3    | NM_170606:c.C6729T;p.L2243L    | rs75510609  |      | P12 |
| chr8 | 41953907 | 41953907 | T | G | exonic          | nonsynonymous SN\ | MYST3   | NM_006766:c.A1139C;p.E380A     |             | 0.14 | P12 |
| chr8 | 41953908 | 41953908 | C | A | exonic          | stopgain SNV      | MYST3   | NM_006766:c.G1138T;p.E380X     |             | 0.14 | P12 |
| chr9 | 21156077 | 21156077 | T | C | exonic          | nonsynonymous SN\ | IFNA21  | NM_002175:c.A535G;p.K179E      | rs3750478   | 0    | P12 |
| chr9 | 21294803 | 21294803 | G | A | exonic          | synonymous SNV    | IFNA5   | NM_002169:c.C453T;p.T151T      | rs10757212  |      | P12 |
| chr9 | 21399584 | 21399584 | G | A | exonic          | nonsynonymous SN\ | IFNA8   | NM_002170:c.G409A;p.E137K      | rs3739630   | 0.19 | P12 |
| chr9 | 32620472 | 32620472 | T | C | exonic          | synonymous SNV    | TAF1L   | NM_153809:c.A5106G;p.K1702K    | rs10758145  |      | P12 |
| chr9 | 32621369 | 32621369 | C | T | exonic          | synonymous SNV    | TAF1L   | NM_153809:c.G4209A;p.T1403T    | rs10971047  |      | P12 |
| chr9 | 1.17E+08 | 1.17E+08 | C | G | exonic          | nonsynonymous SN\ | TNC     | NM_002160:c.G6022C;p.E2008Q    | rs13321     | 0.64 | P12 |
| chr9 | 1.17E+08 | 1.17E+08 | T | C | exonic          | synonymous SNV    | TNC     | NM_002160:c.A5673G;p.R1891R    | rs12347433  |      | P12 |
| chr9 | 1.17E+08 | 1.17E+08 | C | T | exonic          | nonsynonymous SN\ | TNC     | NM_002160:c.G3197A;p.R1066H    | rs45602433  | 0.12 | P12 |
| chr9 | 1.17E+08 | 1.17E+08 | T | C | exonic          | synonymous SNV    | TNC     | NM_002160:c.A696G;p.V232V      | rs2992147   |      | P12 |
| chr9 | 1.17E+08 | 1.17E+08 | C | T | exonic          | synonymous SNV    | TNC     | NM_002160:c.G276A;p.V92V       | rs944510    |      | P12 |
| chr9 | 1.23E+08 | 1.23E+08 | G | A | exonic          | synonymous SNV    | TRAF1   | NM_001190947:c.C144T;p.S48S    | rs3747841   |      | P12 |
| chr9 | 1.24E+08 | 1.24E+08 | A | C | exonic          | synonymous SNV    | OR1L1   | NM_001005236:c.A513C;p.S171S   | rs70156     |      | P12 |

|       |          |          |   |   |        |                   |          |                               |             |      |     |
|-------|----------|----------|---|---|--------|-------------------|----------|-------------------------------|-------------|------|-----|
| chr9  | 1.37E+08 | 1.37E+08 | C | T | exonic | synonymous SNV    | COL5A1   | NM_000093:c.C4905T;p.P1635P   |             |      | P12 |
| chr10 | 28141461 | 28141461 | C | A | exonic | nonsynonymous SNV | ARMC4    | NM_018076:c.G3121T;p.A1041S   | rs3737184   | 0.04 | P12 |
| chr10 | 28300157 | 28300157 | A | G | exonic | nonsynonymous SNV | ARMC4    | NM_018076:c.T1028C;p.I343T    | rs4405206   | 0.72 | P12 |
| chr10 | 35969137 | 35969137 | G | A | exonic | synonymous SNV    | FZD8     | NM_031866:c.C1227T;p.A409A    | rs74989785  |      | P12 |
| chr10 | 35969356 | 35969356 | C | T | exonic | synonymous SNV    | FZD8     | NM_031866:c.G1008A;p.E336E    | rs73270587  |      | P12 |
| chr10 | 55252206 | 55252206 | A | T | exonic | synonymous SNV    | PCDH15   | NM_001142767:c.T5166A;p.P1722 | rs58461416  |      | P12 |
| chr10 | 75343107 | 75343107 | T | C | exonic | nonsynonymous SNV | PLAU     | NM_001145031:c.T371C;p.L124P  | rs2227564   | 0.06 | P12 |
| chr10 | 97131477 | 97131477 | G | A | exonic | synonymous SNV    | SORBS1   | NM_001034957:c.C978T;p.Y326Y  | rs61739184  |      | P12 |
| chr10 | 97164342 | 97164342 | T | C | exonic | nonsynonymous SNV | SORBS1   | NM_001034954:c.A709G;p.T237A  | rs2281939   | 0    | P12 |
| chr10 | 97164527 | 97164527 | C | A | exonic | nonsynonymous SNV | SORBS1   | NM_001034954:c.G524T;p.G175V  | rs7081076   | 0    | P12 |
| chr10 | 1.06E+08 | 1.06E+08 | T | C | exonic | synonymous SNV    | COL17A1  | NM_000494:c.A2904G;p.P968P    | rs2274100   |      | P12 |
| chr10 | 1.06E+08 | 1.06E+08 | G | T | exonic | synonymous SNV    | COL17A1  | NM_000494:c.C2883A;p.P961P    | rs2296219   |      | P12 |
| chr10 | 1.06E+08 | 1.06E+08 | G | A | exonic | synonymous SNV    | COL17A1  | NM_000494:c.C2595T;p.R865R    | rs4918079   |      | P12 |
| chr10 | 1.27E+08 | 1.27E+08 | C | T | exonic | nonsynonymous SNV | CTBP2    | NM_022802:c.G700A;p.V234M     | rs3781409   | 0    | P12 |
| chr10 | 1.29E+08 | 1.29E+08 | T | C | exonic | synonymous SNV    | DOCK1    | NM_001380:c.T4482C;p.I1494I   | rs2229600   |      | P12 |
| chr11 | 1.08E+08 | 1.08E+08 | A | G | exonic | nonsynonymous SNV | ATM      | NM_000051:c.A4949G;p.N1650S   | rs55870064  | 1    | P12 |
| chr11 | 1.24E+08 | 1.24E+08 | A | G | exonic | synonymous SNV    | OR8B8    | NM_012378:c.T360C;p.Y120Y     | rs4296049   |      | P12 |
| chr12 | 6100741  | 6100741  | C | T | exonic | nonsynonymous SNV | VWF      | NM_000552:c.G80A;p.R27H       |             | 0    | P12 |
| chr12 | 25289548 | 25289548 | C | T | exonic | nonsynonymous SNV | KRAS     | NM_004985:c.G38A;p.G13D       | rs112445441 | 0    | P12 |
| chr12 | 46654243 | 46654243 | C | T | exonic | nonsynonymous SNV | COL2A1   | NM_033150:c.G4006A;p.G1336S   | rs2070739   | 0.01 | P12 |
| chr12 | 46787428 | 46787428 | A | T | exonic | nonsynonymous SNV | PFKM     | NM_001166686:c.A5T;p.H2L      | rs11609399  | 0    | P12 |
| chr12 | 1.27E+08 | 1.27E+08 | A | G | exonic | nonsynonymous SNV | TMEM132C | NM_001136103:c.A482G;p.H161R  | rs11059681  |      | P12 |
| chr12 | 1.28E+08 | 1.28E+08 | G | A | exonic | synonymous SNV    | TMEM132D | NM_133448:c.C1887T;p.I629I    | rs60962336  |      | P12 |
| chr12 | 1.28E+08 | 1.28E+08 | C | T | exonic | synonymous SNV    | TMEM132D | NM_133448:c.G1758A;p.E586E    | rs77363876  |      | P12 |
| chr13 | 23924577 | 23924577 | C | T | exonic | nonsynonymous SNV | PARP4    | NM_006437:c.G2981A;p.R994H    |             | 0.6  | P12 |
| chr14 | 31632494 | 31632494 | A | G | exonic | synonymous SNV    | ARHGAP5  | NM_001030055:c.A2868G;p.E956E |             |      | P12 |
| chr15 | 75131848 | 75131848 | T | A | exonic | synonymous SNV    | TSPAN3   | NM_001168412:c.A411T;p.V137V  | rs11737     |      | P12 |
| chr15 | 88027951 | 88027951 | C | A | exonic | synonymous SNV    | PEX11A   | NM_003847:c.G405T;p.L135L     | rs7169981   |      | P12 |
| chr16 | 3973437  | 3973437  | T | C | exonic | nonsynonymous SNV | ADCY9    | NM_0011116:c.A2316G;p.I772M   | rs2230739   | 0.14 | P12 |
| chr16 | 4104365  | 4104365  | C | T | exonic | synonymous SNV    | ADCY9    | NM_0011116:c.G1080A;p.R360R   | rs2230738   |      | P12 |
| chr16 | 23108262 | 23108262 | T | C | exonic | synonymous SNV    | SCNN1G   | NM_001039:c.T387C;p.Y129Y     | rs5734      |      | P12 |
| chr16 | 23108349 | 23108349 | T | C | exonic | synonymous SNV    | SCNN1G   | NM_001039:c.T474C;p.I158I     | rs5735      |      | P12 |
| chr16 | 23108424 | 23108424 | C | T | exonic | synonymous SNV    | SCNN1G   | NM_001039:c.C549T;p.G183G     | rs5737      |      | P12 |
| chr16 | 66537668 | 66537668 | G | T | exonic | nonsynonymous SNV | SLC12A4  | NM_001145962:c.C2520A;p.H840Q |             | 0.62 | P12 |
| chr17 | 1525689  | 1525689  | C | T | exonic | synonymous SNV    | PRPF8    | NM_006445:c.G2847A;p.P949P    | rs33965342  |      | P12 |
| chr17 | 1527679  | 1527679  | G | C | exonic | synonymous SNV    | PRPF8    | NM_006445:c.C1914G;p.L638L    | rs11078565  |      | P12 |
| chr17 | 1531074  | 1531074  | A | G | exonic | synonymous SNV    | PRPF8    | NM_006445:c.T891C;p.N297N     | rs7503397   |      | P12 |
| chr17 | 1531880  | 1531880  | A | G | exonic | synonymous SNV    | PRPF8    | NM_006445:c.T637C;p.L213L     | rs11559305  |      | P12 |
| chr17 | 3570434  | 3570434  | A | T | exonic | nonsynonymous SNV | ITGAE    | NM_002208:c.T3249A;p.D1083E   |             | 0.04 | P12 |
| chr17 | 3579585  | 3579585  | G | A | exonic | nonsynonymous SNV | ITGAE    | NM_002208:c.C2848T;p.R950W    | rs1716      | 0.02 | P12 |
| chr17 | 7520197  | 7520197  | G | C | exonic | nonsynonymous SNV | TP53     | NM_000546:c.C215G;p.P72R      | rs1042522   | 0.45 | P12 |
| chr17 | 10483611 | 10483611 | T | C | exonic | synonymous SNV    | MYH3     | NM_002470:c.A2916G;p.T972T    | rs2285472   |      | P12 |
| chr17 | 10484188 | 10484188 | T | C | exonic | synonymous SNV    | MYH3     | NM_002470:c.A2532G;p.A844A    | rs2285469   |      | P12 |
| chr17 | 17663744 | 17663744 | G | C | exonic | nonsynonymous SNV | SREBF1   | NM_004176:c.C544G;p.Q182E     | rs70937018  | 0.57 | P12 |
| chr17 | 38497799 | 38497799 | T | A | exonic | nonsynonymous SNV | BRCA1    | NM_007297:c.A3134T;p.E1045V   |             | 0    | P12 |
| chr17 | 69757696 | 69757696 | T | C | exonic | synonymous SNV    | TTYH2    | NM_032646:c.T957C;p.L319L     | rs3897753   |      | P12 |
| chr17 | 69758061 | 69758061 | C | T | exonic | synonymous SNV    | TTYH2    | NM_052869:c.C123T;p.T41T      | rs7224615   |      | P12 |
| chr17 | 69760078 | 69760078 | A | G | exonic | synonymous SNV    | TTYH2    | NM_052869:c.A264G;p.A88A      | rs60137033  |      | P12 |
| chr17 | 69760107 | 69760107 | C | T | exonic | nonsynonymous SNV | TTYH2    | NM_052869:c.C293T;p.T98I      | rs12600564  | 0.06 | P12 |
| chr17 | 71262454 | 71262454 | C | G | exonic | synonymous SNV    | ITGB4    | NM_001005619:c.C4311G;p.P1437 | rs8669      |      | P12 |
| chr17 | 75922502 | 75922502 | T | G | exonic | synonymous SNV    | RNF213   | NM_020914:c.T4293G;p.T1431T   | rs76985739  |      | P12 |
| chr18 | 6967844  | 6967844  | A | G | exonic | nonsynonymous SNV | LAMA1    | NM_005559:c.T6227C;p.I2076T   | rs671871    | 0.67 | P12 |
| chr18 | 49190992 | 49190992 | T | C | exonic | synonymous SNV    | DCC      | NM_005215:c.T3108C;p.P1036P   | rs34395300  |      | P12 |

|       |          |          |   |   |                 |                   |          |                                |             |          |
|-------|----------|----------|---|---|-----------------|-------------------|----------|--------------------------------|-------------|----------|
| chr19 | 43627120 | 43627120 | A | G | exonic          | synonymous SNV    | RYR1     | NM_000540:c.A594G:p.L198L      | rs2229139   | P12      |
| chr19 | 43682296 | 43682296 | C | T | exonic          | synonymous SNV    | RYR1     | NM_000540:c.C7209T;p.R2403R    | rs78795178  | P12      |
| chr19 | 48067938 | 48067938 | C | A | exonic          | nonsynonymous SNV | PSG1     | NM_001184825:c.G530T;p.S177I   |             | 0 P12    |
| chr19 | 48400053 | 48400053 | G | A | exonic          | synonymous SNV    | PSG4     | NM_002780:c.C255T;p.D85D       | rs77454946  | P12      |
| chr19 | 48463850 | 48463850 | G | T | exonic          | nonsynonymous SNV | PSG9     | NM_002784:c.C356A;p.T119N      |             | 0.06 P12 |
| chr19 | 48464142 | 48464142 | C | T | splicing        |                   | PSG9     |                                | rs3746297   | P12      |
| chr19 | 48465372 | 48465372 | G | C | exonic          | nonsynonymous SNV | PSG9     | NM_002784:c.C52G;p.L18V        | rs8101191   | 0.07 P12 |
| chr19 | 59938551 | 59938551 | C | T | exonic          | synonymous SNV    | KIR3DL3  | NM_153443:c.C969T;p.H323H      | rs78691806  | P12      |
| chr19 | 59986749 | 59986749 | G | C | splicing        |                   | KIR2DL1  |                                |             | P12      |
| chr19 | 60069820 | 60069820 | C | T | exonic          | nonsynonymous SNV | KIR3DL2  | NM_006737:c.C1190T;p.T397M     | rs3745902   | 0.01 P12 |
| chr20 | 23372660 | 23372660 | G | C | exonic          | synonymous SNV    | CSTL1    | NM_138283:c.G309C;p.L103L      | rs12625959  | P12      |
| chrX  | 31106008 | 31106008 | A | T | exonic;splicing | synonymous SNV    | DMD      | NM_004015:c.T1020A;p.T340T     |             | P12      |
| chr19 | 7882024  | 7882024  | G | A | exonic          | nonsynonymous SNV | MAP2K7   | NM_145185:c.G835A;p.G279S      |             | P17      |
| chr2  | 2.38E+08 | 2.38E+08 | C | T | exonic          | nonsynonymous SNV | COL6A3   | NM_057166:c.G6611A;p.R2204H    |             | P18      |
| chr5  | 1.12E+08 | 1.12E+08 | C | T | exonic          | stopgain SNV      | APC      | NM_001127511:c.C4294T;p.R1432X |             | 0.04 P18 |
| chr6  | 1.53E+08 | 1.53E+08 | G | A | exonic          | synonymous SNV    | SYNE1    | NM_033071:c.C10701T;p.I3567I   |             | P18      |
| chr12 | 25289551 | 25289551 | C | T | exonic          | nonsynonymous SNV | KRAS     | NM_004985:c.G35A;p.G12D        |             | 0 P18    |
| chr17 | 7518295  | 7518295  | C | T | exonic          | nonsynonymous SNV | TP53     | NM_001126115:c.G315A;p.M105I   |             | 0 P18    |
| chr5  | 1.12E+08 | 1.12E+08 | G | T | exonic          | stopgain SNV      | APC      | NM_001127511:c.G4081T;p.E1361X |             | 0.01 P64 |
| chr5  | 1.4E+08  | 1.4E+08  | G | A | exonic          | nonsynonymous SNV | PCDHA9   | NM_014005:c.G1813A;p.A605T     |             | 0 P64    |
| chr6  | 1.52E+08 | 1.52E+08 | G | C | exonic          | nonsynonymous SNV | SYNE1    | NM_133650:c.C2476G;p.R826G     |             | 0 P64    |
| chr17 | 7519131  | 7519131  | C | T | exonic          | nonsynonymous SNV | TP53     | NM_001126115:c.G128A;p.R43H    | rs28934578  | 0 P64    |
| chr17 | 7518269  | 7518269  | A | C | exonic          | nonsynonymous SNV | TP53     | NM_001126115:c.T341G;p.M114R   |             | 0 P65    |
| chrX  | 32777840 | 32777840 | C | A | exonic          | stopgain SNV      | DMD      | NM_000109:c.G88T;p.E30X        |             | 0.71 P65 |
| chr7  | 1.03E+08 | 1.03E+08 | C | T | exonic          | synonymous SNV    | RELN     | NM_005045:c.G4368A;p.G1456G    |             | P66      |
| chr17 | 7518264  | 7518264  | G | A | exonic          | nonsynonymous SNV | TP53     | NM_001126115:c.C346T;p.R116W   |             | 0 P66    |
| chr17 | 26678983 | 26678983 | G | A | exonic;splicing | nonsynonymous SNV | NF1      | NM_000267:c.G5546A;p.R1849Q    |             | 0 P66    |
| chrX  | 32392718 | 32392718 | T | C | exonic          | nonsynonymous SNV | DMD      | NM_004007:c.A2813G;p.K938R     |             | 0.31 P66 |
| chr3  | 10417702 | 10417702 | C | A | exonic          | nonsynonymous SNV | ATP2B2   | NM_001001331:c.G716T;p.S239I   |             | 0 P67    |
| chr4  | 1.27E+08 | 1.27E+08 | G | A | exonic          | nonsynonymous SNV | FAT4     | NM_024582:c.G6532A;p.A2178T    |             | 0 P67    |
| chr5  | 1.4E+08  | 1.4E+08  | C | T | exonic          | nonsynonymous SNV | PCDHA8   | NM_018911:c.C2197T;p.R733W     |             | 0.02 P67 |
| chr7  | 1.03E+08 | 1.03E+08 | G | T | exonic          | nonsynonymous SNV | RELN     | NM_005045:c.C4484A;p.T1495K    |             | 0 P67    |
| chr12 | 25271542 | 25271542 | T | G | exonic          | nonsynonymous SNV | KRAS     | NM_004985:c.A183C;p.Q61H       |             | 0.01 P67 |
| chr17 | 7518263  | 7518263  | C | T | exonic          | nonsynonymous SNV | TP53     | NM_001126115:c.G347A;p.R116Q   | rs11540652  | 0.02 P67 |
| chr1  | 51678674 | 51678674 | G | C | exonic          | nonsynonymous SNV | EPS15    | NM_001981:c.C973G;p.P325A      |             | 1 P61    |
| chr1  | 1.84E+08 | 1.84E+08 | C | A | exonic          | nonsynonymous SNV | HMCN1    | NM_031935:c.C4103A;p.T1368K    |             | 0.06 P61 |
| chr2  | 2.38E+08 | 2.38E+08 | G | A | exonic          | synonymous SNV    | COL6A3   | NM_057166:c.C933T;p.Y311Y      | rs114492689 | P61      |
| chr5  | 1.4E+08  | 1.4E+08  | G | A | exonic          | nonsynonymous SNV | PCDHA12  | NM_018903:c.G1366A;p.A456T     |             | P61      |
| chr12 | 1.28E+08 | 1.28E+08 | C | T | exonic          | nonsynonymous SNV | TMEM132D | NM_133448:c.G2345A;p.R782Q     |             | 0.06 P61 |
| chr18 | 46845917 | 46845917 | G | A | exonic          | nonsynonymous SNV | SMAD4    | NM_005359:c.G1082A;p.R361H     |             | 0 P61    |
| chr1  | 70277638 | 70277638 | C | T | exonic          | synonymous SNV    | LRRC7    | NM_020794:c.C3429T;p.Y1143Y    |             | P62      |
| chr1  | 2.14E+08 | 2.14E+08 | G | A | exonic          | synonymous SNV    | USH2A    | NM_206933:c.C8319T;p.S2773S    | rs56829872  | P62      |
| chr5  | 24523677 | 24523677 | C | A | exonic          | nonsynonymous SNV | CDH10    | NM_006727:c.G2219T;p.G740V     |             | 0 P62    |
| chr5  | 1.12E+08 | 1.12E+08 | G | T | exonic          | stopgain SNV      | APC      | NM_001127511:c.G4135T;p.E1379X |             | 0.16 P62 |
| chr5  | 1.4E+08  | 1.4E+08  | G | A | exonic          | synonymous SNV    | PCDHA10  | NM_018901:c.G1581A;p.L527L     |             | P62      |
| chr6  | 1.53E+08 | 1.53E+08 | G | A | exonic          | nonsynonymous SNV | SYNE1    | NM_015293:c.C6494T;p.A2165V    |             | 0.01 P62 |
| chr9  | 32620670 | 32620670 | A | G | exonic          | synonymous SNV    | TAF1L    | NM_153809:c.T4908C;p.D1636D    |             | P62      |
| chr16 | 3719605  | 3719605  | C | T | exonic          | nonsynonymous SNV | CREBBP   | NM_001079846:c.G5330A;p.G1777D |             | 0.02 P62 |
| chr17 | 7517846  | 7517846  | G | A | exonic          | nonsynonymous SNV | TP53     | NM_001126115:c.C421T;p.R141C   |             | 0 P62    |
| chr5  | 1.4E+08  | 1.4E+08  | C | T | exonic          | synonymous SNV    | PCDHB3   | NM_018937:c.C1023T;p.N341N     |             | P63      |
| chr19 | 48214917 | 48214917 | T | A | exonic          | nonsynonymous SNV | PSG11    | NM_001113410:c.A188T;p.Q63L    |             | 0 P63    |
| chr1  | 2.46E+08 | 2.46E+08 | C | T | exonic          | nonsynonymous SNV | OR2M2    | NM_001004688:c.C806T;p.T269M   |             | 0.1 P68  |
| chr2  | 1.7E+08  | 1.7E+08  | G | T | exonic          | nonsynonymous SNV | LRP2     | NM_004525:c.C6317A;p.S2106Y    |             | 0.02 P68 |

|       |          |          |   |   |                 |                   |          |                                |             |     |     |
|-------|----------|----------|---|---|-----------------|-------------------|----------|--------------------------------|-------------|-----|-----|
| chr5  | 1.12E+08 | 1.12E+08 | C | T | exonic          | stopgain SNV      | APC      | NM_001127511:c.C3958T;p.Q1320X | 0.07        | P68 |     |
| chr9  | 96973183 | 96973183 | G | A | exonic;splicing | stopgain SNV      | FANCC    | NM_000136:c.C520T;p.R174X      | 0.13        | P68 |     |
| chr11 | 1.08E+08 | 1.08E+08 | G | A | splicing        |                   | ATM      |                                |             | P68 |     |
| chr19 | 43668596 | 43668596 | G | A | exonic          | nonsynonymous SNV | RYR1     | NM_000540:c.G5461A;p.D1821N    | 0.7         | P68 |     |
| chr2  | 2.38E+08 | 2.38E+08 | C | T | exonic          | synonymous SNV    | COL6A3   | NM_057166:c.G3444A;p.S1148S    |             | P77 |     |
| chr5  | 24523765 | 24523765 | G | A | exonic          | nonsynonymous SNV | CDH10    | NM_006727:c.C2131T;p.R711W     | 0.02        | P77 |     |
| chr5  | 1.12E+08 | 1.12E+08 | C | T | exonic          | stopgain SNV      | APC      | NM_001127511:c.C2572T;p.R858X  | 0.03        | P77 |     |
| chr7  | 93872468 | 93872468 | C | T | exonic          | stopgain SNV      | COL1A2   | NM_000089:c.C454T;p.R152X      | 0.03        | P77 |     |
| chr7  | 1.03E+08 | 1.03E+08 | G | A | exonic          | nonsynonymous SNV | RELN     | NM_005045:c.C5179T;p.R1727W    | 0           | P77 |     |
| chr11 | 1.08E+08 | 1.08E+08 | A | C | exonic          | nonsynonymous SNV | ATM      | NM_000051:c.A4783C;p.N1595H    | 0.42        | P77 |     |
| chr11 | 1.08E+08 | 1.08E+08 | G | A | exonic          | nonsynonymous SNV | ATM      | NM_000051:c.G6601A;p.V2201I    | 0.65        | P77 |     |
| chr12 | 25289548 | 25289548 | C | T | exonic          | nonsynonymous SNV | KRAS     | NM_004985:c.G38A;p.G13D        | rs112445441 | 0   | P77 |
| chr12 | 1.29E+08 | 1.29E+08 | G | A | exonic          | stopgain SNV      | TMEM132D | NM_133448:c.C529T;p.R177X      |             | P77 |     |
| chr17 | 1505577  | 1505577  | C | T | exonic          | nonsynonymous SNV | PRPF8    | NM_006445:c.G5804A;p.R1935H    | 0           | P77 |     |
| chr7  | 1.13E+08 | 1.13E+08 | T | C | exonic          | nonsynonymous SNV | PPP1R3A  | NM_002711:c.A1508G;p.E503G     | 0.07        | P76 |     |
| chr17 | 7519131  | 7519131  | C | T | exonic          | nonsynonymous SNV | TP53     | NM_001126115:c.G128A;p.R43H    | rs28934578  | 0   | P76 |
| chr18 | 46827428 | 46827428 | C | G | exonic          | nonsynonymous SNV | SMAD4    | NM_005359:c.C14G;p.S5C         | 0.02        | P76 |     |
| chr1  | 46284216 | 46284216 | C | T | exonic          | nonsynonymous SNV | PIK3R3   | NM_003629:c.G1148A;p.R383H     | 0           | P70 |     |
| chr9  | 1.37E+08 | 1.37E+08 | C | T | exonic          | synonymous SNV    | COL5A1   | NM_000093:c.C825T;p.Y275Y      |             | P70 |     |
| chr12 | 25271542 | 25271542 | T | G | exonic          | nonsynonymous SNV | KRAS     | NM_004985:c.A183C;p.Q61H       | 0.01        | P70 |     |
| chr2  | 1.7E+08  | 1.7E+08  | C | T | exonic          | synonymous SNV    | LRP2     | NM_004525:c.G12111A;p.T4037T   |             | P71 |     |
| chr5  | 1.4E+08  | 1.4E+08  | G | A | exonic          | nonsynonymous SNV | PCDHA11  | NM_018902:c.G1990A;p.V664M     |             | P71 |     |
| chr9  | 1.24E+08 | 1.24E+08 | C | T | exonic          | synonymous SNV    | OR1L1    | NM_001005236:c.C537T;p.C179C   |             | P71 |     |
| chr17 | 7517839  | 7517839  | C | T | exonic          | nonsynonymous SNV | TP53     | NM_001126115:c.G428A;p.C143Y   | 0           | P71 |     |
| chr17 | 10310419 | 10310419 | G | T | exonic          | nonsynonymous SNV | MYH4     | NM_017533:c.C244A;p.P82T       | 0           | P71 |     |
| chr18 | 6975577  | 6975577  | T | C | exonic          | synonymous SNV    | LAMA1    | NM_005559:c.A5445G;p.G1815G    |             | P71 |     |
| chrX  | 1.54E+08 | 1.54E+08 | G | A | exonic          | nonsynonymous SNV | F8       | NM_000132:c.C1834T;p.R612C     | 0           | P71 |     |
| chr1  | 1.57E+08 | 1.57E+08 | C | T | exonic          | nonsynonymous SNV | SPTA1    | NM_003126:c.G5041A;p.V1681I    | 0.28        | P73 |     |
| chr5  | 24571019 | 24571019 | G | A | exonic          | nonsynonymous SNV | CDH10    | NM_006727:c.C773T;p.T258M      | 0.04        | P73 |     |
| chr5  | 1.12E+08 | 1.12E+08 | G | A | splicing        |                   | APC      |                                |             | P73 |     |
| chr16 | 60492800 | 60492800 | T | A | exonic          | nonsynonymous SNV | CDH8     | NM_001796:c.A331T;p.I111L      | 0           | P73 |     |
| chr17 | 7519131  | 7519131  | C | T | exonic          | nonsynonymous SNV | TP53     | NM_001126115:c.G128A;p.R43H    | rs28934578  | 0   | P73 |
| chrX  | 31607426 | 31607426 | A | G | exonic          | nonsynonymous SNV | DMD      | NM_004013:c.T479C;p.I160T      | 0.11        | P73 |     |
| chr2  | 2.38E+08 | 2.38E+08 | C | T | exonic          | nonsynonymous SNV | COL6A3   | NM_057166:c.G4088A;p.R1363H    |             | P72 |     |
| chr4  | 1.26E+08 | 1.26E+08 | G | A | exonic          | nonsynonymous SNV | FAT4     | NM_024582:c.G1898A;p.R633H     |             | P72 |     |
| chr5  | 1.12E+08 | 1.12E+08 | C | T | exonic          | stopgain SNV      | APC      | NM_001127511:c.C667T;p.R223X   | 0           | P72 |     |
| chr11 | 76724799 | 76724799 | G | A | exonic          | nonsynonymous SNV | PAK1     | NM_001128620:c.C1393T;p.L465F  | 0           | P72 |     |
| chr12 | 25289551 | 25289551 | C | T | exonic          | nonsynonymous SNV | KRAS     | NM_004985:c.G35A;p.G12D        | 0           | P72 |     |
| chr1  | 70277424 | 70277424 | G | T | exonic          | nonsynonymous SNV | LRRRC7   | NM_020794:c.G3215T;p.S1072I    | 0           | P75 |     |
| chr5  | 1.4E+08  | 1.4E+08  | C | T | exonic          | synonymous SNV    | PCDHA2   | NM_018905:c.C270T;p.I90I       |             | P75 |     |
| chr5  | 1.4E+08  | 1.4E+08  | C | T | exonic          | synonymous SNV    | PCDHB2   | NM_018936:c.C1905T;p.R635R     |             | P75 |     |
| chr6  | 90717163 | 90717163 | C | T | exonic          | synonymous SNV    | BACH2    | NM_0011170794:c.G1383A;p.P461P |             | P75 |     |
| chr6  | 1.69E+08 | 1.69E+08 | C | T | exonic          | nonsynonymous SNV | THBS2    | NM_003247:c.G2671A;p.G891S     | 0           | P75 |     |
| chr18 | 48988045 | 48988045 | A | G | splicing        |                   | DCC      |                                |             | P75 |     |
| chr18 | 49267307 | 49267307 | C | T | exonic          | synonymous SNV    | DCC      | NM_005215:c.C3879T;p.F1293F    |             | P75 |     |
| chr5  | 1.12E+08 | 1.12E+08 | G | A | splicing        |                   | APC      |                                |             | P74 |     |
| chr5  | 1.12E+08 | 1.12E+08 | G | T | exonic          | stopgain SNV      | APC      | NM_001127511:c.G3829T;p.E1277X | 0.07        | P74 |     |
| chr6  | 1.53E+08 | 1.53E+08 | G | A | exonic          | synonymous SNV    | SYNE1    | NM_033071:c.C8190T;p.H2730H    |             | P74 |     |
| chr12 | 25271542 | 25271542 | T | G | exonic          | nonsynonymous SNV | KRAS     | NM_004985:c.A183C;p.Q61H       | 0.01        | P74 |     |
| chr17 | 7518295  | 7518295  | C | T | exonic          | nonsynonymous SNV | TP53     | NM_001126115:c.G315A;p.M105I   | 0           | P74 |     |
| chr3  | 58130456 | 58130456 | C | G | exonic          | nonsynonymous SNV | FLNB     | NM_001164319:c.C7445G;p.P2482R | 0.06        | P3  |     |
| chr5  | 82873647 | 82873647 | T | G | exonic          | nonsynonymous SNV | VCAN     | NM_001164097:c.T6108G;p.D2036E | 0.01        | P3  |     |
| chr5  | 1.4E+08  | 1.4E+08  | G | A | exonic          | synonymous SNV    | PCDHA10  | NM_018901:c.G1365A;p.A455A     |             | P3  |     |

|       |          |          |   |   |                 |                   |        |                                |             |         |
|-------|----------|----------|---|---|-----------------|-------------------|--------|--------------------------------|-------------|---------|
| chr9  | 1.37E+08 | 1.37E+08 | A | T | exonic          | nonsynonymous SNV | COL5A1 | NM_000093:c.A914T:p.E305V      | 0.15        | P3      |
| chr13 | 23928485 | 23928485 | T | C | exonic          | synonymous SNV    | PARP4  | NM_006437:c.A2556G:p.E852E     |             | P3      |
| chr13 | 65776827 | 65776827 | T | G | exonic          | synonymous SNV    | PCDH9  | NM_020403:c.A3573C:p.A1191A    |             | P3      |
| chr17 | 7520103  | 7520103  | G | C | exonic          | stopgain SNV      | TP53   | NM_000546:c.C309G:p.Y103X      | 0.01        | P3      |
| chr2  | 2.38E+08 | 2.38E+08 | C | T | exonic          | nonsynonymous SNV | COL6A3 | NM_057166:c.G845A:p.R282H      | rs111295967 | P5      |
| chr15 | 26049293 | 26049293 | C | T | exonic          | nonsynonymous SNV | HERC2  | NM_004667:c.G12613A:p.G4205R   |             | 0 P5    |
| chr1  | 1.51E+08 | 1.51E+08 | C | A | exonic          | nonsynonymous SNV | FLG    | NM_002016:c.G4784T:p.S1595I    |             | 0.01 P4 |
| chr5  | 1.12E+08 | 1.12E+08 | C | T | exonic;splicing | stopgain SNV      | APC    | NM_000038:c.C646T:p.R216X      | rs62619935  | 0.19 P4 |
| chr5  | 1.12E+08 | 1.12E+08 | C | T | exonic          | stopgain SNV      | APC    | NM_001127511:c.C1279T:p.Q427X  |             | 0.01 P6 |
| chr17 | 7518293  | 7518293  | C | A | exonic          | nonsynonymous SNV | TP53   | NM_001126115:c.G317T:p.C106F   |             | 0 P6    |
| chrX  | 32290968 | 32290968 | C | T | exonic          | nonsynonymous SNV | DMD    | NM_004011:c.G1160A:p.R387H     |             | 0.07 P6 |
| chrX  | 32413094 | 32413094 | C | T | exonic          | nonsynonymous SNV | DMD    | NM_004007:c.G2297A:p.R766Q     |             | 0.69 P6 |
| chr1  | 29516857 | 29516857 | C | T | exonic          | nonsynonymous SNV | PTPRU  | NM_001195001:c.C3515T:p.S1172L |             | 0.12 P7 |
| chr1  | 70030332 | 70030332 | G | C | exonic          | nonsynonymous SNV | LRRC7  | NM_020794:c.G208C:p.A70P       |             | 0.04 P7 |
| chr1  | 1.84E+08 | 1.84E+08 | G | T | exonic          | nonsynonymous SNV | HMCN1  | NM_031935:c.G13117T:p.V4373L   |             | 0.2 P7  |
| chr4  | 1.27E+08 | 1.27E+08 | A | T | exonic          | nonsynonymous SNV | FAT4   | NM_024582:c.A9283T:p.S3095C    |             | 0.01 P7 |
| chr5  | 1.69E+08 | 1.69E+08 | A | T | exonic          | nonsynonymous SNV | DOCK2  | NM_004946:c.A5356T:p.T1786S    |             | 0 P7    |
| chr6  | 1.53E+08 | 1.53E+08 | G | C | exonic          | nonsynonymous SNV | SYNE1  | NM_015293:c.C4897G:p.Q1633E    |             | 0.01 P7 |
| chr7  | 93871835 | 93871835 | C | T | exonic          | nonsynonymous SNV | COL1A2 | NM_000089:c.C311T:p.A104V      |             | 0.22 P7 |
| chr10 | 55239079 | 55239079 | T | C | exonic          | synonymous SNV    | PCDH15 | NM_001142769:c.A4752G:p.K1584K |             | P7      |
| chr12 | 25289548 | 25289548 | C | T | exonic          | nonsynonymous SNV | KRAS   | NM_004985:c.G38A:p.G13D        | rs112445441 | 0 P7    |
| chr17 | 7519250  | 7519250  | G | T | exonic          | stopgain SNV      | TP53   | NM_001126115:c.C9A:p.C3X       |             | 0 P7    |
| chr17 | 10345471 | 10345471 | C | T | exonic          | nonsynonymous SNV | MYH1   | NM_005963:c.G3419A:p.R1140H    |             | 0 P7    |
| chr22 | 39878245 | 39878245 | G | A | exonic          | synonymous SNV    | EP300  | NM_001429:c.G3087A:p.Q1029Q    |             | P7      |
| chr1  | 51602281 | 51602281 | T | C | exonic          | nonsynonymous SNV | EPS15  | NM_001159969:c.A1262G:p.N421S  |             | 0.74 P9 |
| chr1  | 51604289 | 51604289 | G | A | exonic;splicing | nonsynonymous SNV | EPS15  | NM_001159969:c.C1178T:p.A393V  |             | 0.09 P9 |
| chr1  | 69998511 | 69998511 | G | A | exonic          | synonymous SNV    | LRRC7  | NM_020794:c.G36A:p.V12V        | rs1340770   | P9      |
| chr1  | 1.58E+08 | 1.58E+08 | C | T | exonic          | nonsynonymous SNV | ATP1A4 | NM_001001734:c.C488T:p.T163M   |             | 0.08 P9 |
| chr1  | 2.14E+08 | 2.14E+08 | C | T | exonic          | synonymous SNV    | USH2A  | NM_206933:c.G13191A:p.E4397E   | rs2009923   | P9      |
| chr1  | 2.14E+08 | 2.14E+08 | G | A | exonic          | nonsynonymous SNV | USH2A  | NM_206933:c.C9340T:p.P3114S    |             | 0.46 P9 |
| chr1  | 2.14E+08 | 2.14E+08 | G | A | exonic          | nonsynonymous SNV | USH2A  | NM_007123:c.C4241T:p.A1414V    |             | 0.34 P9 |
| chr1  | 2.46E+08 | 2.46E+08 | T | A | exonic          | nonsynonymous SNV | OR2M5  | NM_001004690:c.T530A:p.F177Y   |             | 0.11 P9 |
| chr1  | 2.46E+08 | 2.46E+08 | G | A | exonic          | synonymous SNV    | OR2M3  | NM_001004689:c.G333A:p.E111E   | rs4916112   | P9      |
| chr2  | 15247904 | 15247904 | G | A | exonic          | synonymous SNV    | NBAS   | NM_015909:c.C6507T:p.H2169H    | rs2302942   | P9      |
| chr2  | 1.7E+08  | 1.7E+08  | G | A | exonic          | synonymous SNV    | LRP2   | NM_004525:c.C9234T:p.H3078H    | rs116975392 | P9      |
| chr2  | 1.7E+08  | 1.7E+08  | T | C | exonic          | nonsynonymous SNV | LRP2   | NM_004525:c.A248G:p.N83S       | rs2229263   | 0.97 P9 |
| chr2  | 2.38E+08 | 2.38E+08 | G | A | exonic          | nonsynonymous SNV | COL6A3 | NM_057166:c.C5554T:p.R1852W    |             | P9      |
| chr3  | 8750661  | 8750661  | C | T | exonic          | synonymous SNV    | CAV3   | NM_001234:c.C99T:p.N33N        | rs1008642   | P9      |
| chr3  | 10388601 | 10388601 | G | A | exonic          | synonymous SNV    | ATP2B2 | NM_001683:c.C1416T:p.G472G     | rs2289273   | P9      |
| chr3  | 10388715 | 10388715 | G | A | exonic          | synonymous SNV    | ATP2B2 | NM_001683:c.C1302T:p.N434N     | rs2289274   | P9      |
| chr3  | 58092764 | 58092764 | G | A | exonic          | synonymous SNV    | FLNB   | NM_001164317:c.G4461A:p.P1487  | rs60183346  | P9      |
| chr3  | 58115603 | 58115603 | C | G | exonic          | nonsynonymous SNV | FLNB   | NM_001164319:c.C6608G:p.S2203C |             | 0.01 P9 |
| chr3  | 1.25E+08 | 1.25E+08 | A | G | exonic          | nonsynonymous SNV | MYLK   | NM_053025:c.T782C:p.V261A      | rs3796164   | 0.06 P9 |
| chr3  | 1.53E+08 | 1.53E+08 | A | C | exonic          | synonymous SNV    | IGSF10 | NM_001178145:c.T672G:p.S224S   | rs9864533   | P9      |
| chr4  | 54824835 | 54824835 | T | C | exonic          | synonymous SNV    | PDGFRA | NM_006206:c.T612C:p.N204N      | rs2229307   | P9      |
| chr4  | 54828483 | 54828483 | T | G | exonic          | synonymous SNV    | PDGFRA | NM_006206:c.T939G:p.G313G      | rs4358459   | P9      |
| chr4  | 1.26E+08 | 1.26E+08 | C | T | exonic          | synonymous SNV    | FAT4   | NM_024582:c.C405T:p.F135F      | rs72928772  | P9      |
| chr4  | 1.27E+08 | 1.27E+08 | G | A | exonic          | nonsynonymous SNV | FAT4   | NM_024582:c.G10571A:p.G3524D   | rs1567047   | 0.06 P9 |
| chr4  | 1.27E+08 | 1.27E+08 | C | T | exonic          | nonsynonymous SNV | FAT4   | NM_024582:c.C13361T:p.P4454L   |             | 0.04 P9 |
| chr4  | 1.27E+08 | 1.27E+08 | C | T | exonic          | synonymous SNV    | FAT4   | NM_024582:c.C14355T:p.V4785V   | rs1014865   | P9      |
| chr4  | 1.55E+08 | 1.55E+08 | G | A | exonic          | synonymous SNV    | DCHS2  | NM_017639:c.C8040T:p.I2680I    |             | P9      |
| chr4  | 1.56E+08 | 1.56E+08 | T | C | exonic          | nonsynonymous SNV | DCHS2  | NM_001142552:c.A2303G:p.H768F  | rs10017772  | 0.49 P9 |
| chr4  | 1.56E+08 | 1.56E+08 | A | G | exonic          | nonsynonymous SNV | DCHS2  | NM_017639:c.T458C:p.V153A      | rs11721758  | 0.06 P9 |

|       |          |          |   |   |                 |                   |          |                               |            |         |
|-------|----------|----------|---|---|-----------------|-------------------|----------|-------------------------------|------------|---------|
| chr5  | 1134702  | 1134702  | A | G | exonic          | synonymous SNV    | SLC12A7  | NM_006598:c.T1287C;p.P429P    | rs6865765  | P9      |
| chr5  | 7855363  | 7855363  | C | T | exonic          | synonymous SNV    | ADCY2    | NM_020546:c.C2661T;p.C887C    | rs2290910  | P9      |
| chr5  | 34947464 | 34947464 | G | C | exonic          | nonsynonymous SNV | RAD1     | NM_002853:c.C518G;p.T173R     |            | 0.04 P9 |
| chr5  | 82825403 | 82825403 | A | G | exonic          | synonymous SNV    | VCAN     | NM_001126336:c.A645G;p.V215V  | rs4470745  | P9      |
| chr5  | 82869147 | 82869147 | A | G | exonic          | synonymous SNV    | VCAN     | NM_001164097:c.A1608G;p.T536T | rs16900528 | P9      |
| chr5  | 82869340 | 82869340 | C | A | exonic          | nonsynonymous SNV | VCAN     | NM_001164097:c.C1801A;p.P601T |            | 0 P9    |
| chr5  | 1.4E+08  | 1.4E+08  | G | A | exonic          | synonymous SNV    | PCDHA3   | NM_018906:c.G1383A;p.T461T    |            | P9      |
| chr5  | 1.4E+08  | 1.4E+08  | G | T | exonic          | nonsynonymous SNV | PCDHAC1  | NM_018898:c.G285T;p.L95F      |            | 0.11 P9 |
| chr5  | 1.4E+08  | 1.4E+08  | A | T | exonic          | nonsynonymous SNV | PCDHB3   | NM_018937:c.A1242T;p.R414S    | rs3733699  | 0.21 P9 |
| chr5  | 1.41E+08 | 1.41E+08 | C | T | exonic          | stopgain SNV      | PCDHB6   | NM_018939:c.C2323T;p.Q775X    |            | 0.16 P9 |
| chr5  | 1.41E+08 | 1.41E+08 | T | C | exonic          | synonymous SNV    | PCDHB7   | NM_018940:c.T2190C;p.F730F    | rs11741863 | P9      |
| chr5  | 1.41E+08 | 1.41E+08 | T | A | exonic          | synonymous SNV    | PCDHB11  | NM_018931:c.T1146A;p.V382V    | rs3733688  | P9      |
| chr5  | 1.41E+08 | 1.41E+08 | G | T | exonic          | synonymous SNV    | PCDHB11  | NM_018931:c.G2163T;p.S721S    | rs638054   | P9      |
| chr5  | 1.51E+08 | 1.51E+08 | G | A | exonic          | synonymous SNV    | FAT2     | NM_001447:c.C11079T;p.F3693F  |            | P9      |
| chr6  | 90699213 | 90699213 | C | T | exonic          | nonsynonymous SNV | BACH2    | NM_001170794:c.G2161A;p.E721K |            | 0.03 P9 |
| chr6  | 1.3E+08  | 1.3E+08  | G | T | exonic          | nonsynonymous SNV | LAMA2    | NM_000426:c.G2217T;p.W739C    |            | 0.02 P9 |
| chr6  | 1.3E+08  | 1.3E+08  | A | G | exonic          | synonymous SNV    | LAMA2    | NM_000426:c.A2799G;p.Q933Q    | rs1027199  | P9      |
| chr6  | 1.3E+08  | 1.3E+08  | G | A | exonic          | synonymous SNV    | LAMA2    | NM_000426:c.G6237A;p.T2079T   | rs2297738  | P9      |
| chr6  | 1.53E+08 | 1.53E+08 | G | T | exonic          | nonsynonymous SNV | SYNE1    | NM_033071:c.C15318A;p.S5106R  |            | 0.13 P9 |
| chr6  | 1.53E+08 | 1.53E+08 | C | G | exonic          | synonymous SNV    | SYNE1    | NM_033071:c.G13848C;p.L4616L  | rs3734365  | P9      |
| chr6  | 1.53E+08 | 1.53E+08 | G | A | exonic          | synonymous SNV    | SYNE1    | NM_033071:c.C12063T;p.L4021L  | rs71575926 | P9      |
| chr6  | 1.53E+08 | 1.53E+08 | G | A | exonic          | nonsynonymous SNV | SYNE1    | NM_033071:c.C8405T;p.A2802V   | rs214950   | 0.03 P9 |
| chr6  | 1.66E+08 | 1.66E+08 | T | C | exonic          | synonymous SNV    | PDE10A   | NM_001130690:c.A204G;p.S68S   | rs9459421  | P9      |
| chr7  | 91460170 | 91460170 | A | T | exonic          | nonsynonymous SNV | AKAP9    | NM_005751:c.A441T;p.E147D     |            | 0.07 P9 |
| chr7  | 91468556 | 91468556 | G | T | exonic          | nonsynonymous SNV | AKAP9    | NM_005751:c.G1389T;p.M463I    | rs6964587  | 0.38 P9 |
| chr7  | 91479864 | 91479864 | A | G | exonic          | synonymous SNV    | AKAP9    | NM_005751:c.A3504G;p.E1168E   | rs13245393 | P9      |
| chr7  | 91529537 | 91529537 | C | T | exonic          | synonymous SNV    | AKAP9    | NM_005751:c.C5778T;p.G1926G   | rs10236397 | P9      |
| chr7  | 91550634 | 91550634 | A | G | exonic          | nonsynonymous SNV | AKAP9    | NM_005751:c.A8375G;p.N2792S   | rs6960867  | 0.34 P9 |
| chr7  | 91551908 | 91551908 | C | T | exonic          | synonymous SNV    | AKAP9    | NM_005751:c.C8665T;p.L2889L   | rs10228334 | P9      |
| chr7  | 91553598 | 91553598 | C | T | exonic          | synonymous SNV    | AKAP9    | NM_005751:c.C9145T;p.L3049L   | rs28927678 | P9      |
| chr7  | 91564863 | 91564863 | A | C | exonic          | synonymous SNV    | AKAP9    | NM_005751:c.A10426C;p.R3476R  | rs1063243  | P9      |
| chr7  | 93894285 | 93894285 | C | T | exonic          | synonymous SNV    | COL1A2   | NM_000089:c.C3135T;p.G1045G   | rs1800248  | P9      |
| chr7  | 1E+08    | 1E+08    | C | T | exonic          | synonymous SNV    | MUC17    | NM_001040105:c.C8823T;p.A2941 | rs75247423 | P9      |
| chr7  | 1.03E+08 | 1.03E+08 | A | G | exonic          | synonymous SNV    | RELN     | NM_005045:c.T7887C;p.P2629P   | rs56345626 | P9      |
| chr7  | 1.03E+08 | 1.03E+08 | A | G | exonic          | synonymous SNV    | RELN     | NM_005045:c.T6702C;p.C2234C   | rs2075043  | P9      |
| chr7  | 1.03E+08 | 1.03E+08 | G | C | exonic          | nonsynonymous SNV | RELN     | NM_005045:c.C2989G;p.L997V    | rs362691   | 0.86 P9 |
| chr7  | 1.03E+08 | 1.03E+08 | T | C | exonic          | synonymous SNV    | RELN     | NM_005045:c.A1776G;p.E592E    | rs2072403  | P9      |
| chr7  | 1.52E+08 | 1.52E+08 | C | T | exonic          | synonymous SNV    | MLL3     | NM_170606:c.G8685A;p.Q2895Q   | rs6464211  | P9      |
| chr7  | 1.52E+08 | 1.52E+08 | A | G | exonic          | nonsynonymous SNV | MLL3     | NM_170606:c.T6965C;p.V2322A   |            | 0.04 P9 |
| chr9  | 1.17E+08 | 1.17E+08 | C | T | exonic          | nonsynonymous SNV | TNC      | NM_002160:c.G5341A;p.A1781T   | rs2274750  | 0.02 P9 |
| chr9  | 1.17E+08 | 1.17E+08 | T | C | exonic          | synonymous SNV    | TNC      | NM_002160:c.A5202G;p.T1734T   | rs1061495  | P9      |
| chr9  | 1.37E+08 | 1.37E+08 | G | A | exonic;splicing | synonymous SNV    | COL5A1   | NM_000093:c.G4122A;p.T1374T   | rs3827848  | P9      |
| chr9  | 1.37E+08 | 1.37E+08 | G | C | exonic          | synonymous SNV    | COL5A1   | NM_000093:c.G4482C;p.P1494P   | rs3811146  | P9      |
| chr10 | 55252911 | 55252911 | G | T | exonic          | synonymous SNV    | PCDH15   | NM_001142767:c.C4461A;p.P1487 | rs10825114 | P9      |
| chr10 | 55391643 | 55391643 | G | A | exonic          | nonsynonymous SNV | PCDH15   | NM_001142765:c.C2671T;p.R891C |            | 0.16 P9 |
| chr10 | 55425497 | 55425497 | C | T | exonic          | nonsynonymous SNV | PCDH15   | NM_001142765:c.G2573A;p.R858C | rs2135720  | 0.42 P9 |
| chr10 | 75343885 | 75343885 | C | T | exonic          | synonymous SNV    | PLAU     | NM_001145031:c.C771T;p.N257N  | rs2227568  | P9      |
| chr10 | 1.06E+08 | 1.06E+08 | T | C | exonic          | nonsynonymous SNV | COL17A1  | NM_000494:c.A4109G;p.D1370G   | rs17116350 | 0.49 P9 |
| chr10 | 1.16E+08 | 1.16E+08 | A | G | exonic          | synonymous SNV    | C10orf81 | NM_182601:c.A18G;p.Q6Q        | rs10885500 | P9      |
| chr11 | 66957395 | 66957395 | C | T | exonic          | synonymous SNV    | RPS6KB2  | NM_003952:c.C807T;p.F269F     | rs4930427  | P9      |
| chr11 | 66958732 | 66958732 | C | T | exonic          | nonsynonymous SNV | RPS6KB2  | NM_003952:c.C1259T;p.A420V    | rs13859    | P9      |
| chr11 | 1.24E+08 | 1.24E+08 | T | G | exonic          | nonsynonymous SNV | OR8B12   | NM_001005195:c.A337C;p.I113L  |            | 0.59 P9 |
| chr11 | 1.34E+08 | 1.34E+08 | C | T | exonic          | synonymous SNV    | GLB1L2   | NM_138342:c.C642T;p.Y214Y     | rs3802928  | P9      |

|       |          |          |   |   |          |                   |          |                               |             |      |    |
|-------|----------|----------|---|---|----------|-------------------|----------|-------------------------------|-------------|------|----|
| chr12 | 6037457  | 6037457  | A | G | exonic   | synonymous SNV    | VWF      | NM_000552:c.T1548C:p.Y516Y    | rs1800379   | P9   |    |
| chr12 | 25289548 | 25289548 | C | T | exonic   | nonsynonymous SNV | KRAS     | NM_004985:c.G38A:p.G13D       | rs112445441 | 0    | P9 |
| chr12 | 1.08E+08 | 1.08E+08 | T | C | exonic   | synonymous SNV    | ACACB    | NM_001093:c.T4506C:p.L1502L   | rs2241220   |      | P9 |
| chr12 | 1.08E+08 | 1.08E+08 | C | T | exonic   | synonymous SNV    | ACACB    | NM_001093:c.C6204T:p.H2068H   | rs3742023   |      | P9 |
| chr12 | 1.28E+08 | 1.28E+08 | C | T | exonic   | synonymous SNV    | TMEM132D | NM_133448:c.G1821A:p.T607T    | rs79031518  |      | P9 |
| chr12 | 1.31E+08 | 1.31E+08 | G | A | exonic   | synonymous SNV    | EP400    | NM_015409:c.G9231A:p.S3077S   | rs117244926 |      | P9 |
| chr13 | 23907297 | 23907297 | G | T | exonic   | nonsynonymous SNV | PARP4    | NM_006437:c.C3982A:p.P1328T   | rs1050112   | 0.64 | P9 |
| chr13 | 23907441 | 23907441 | C | G | exonic   | nonsynonymous SNV | PARP4    | NM_006437:c.G3838C:p.G1280R   | rs13428     | 0.09 | P9 |
| chr13 | 23907485 | 23907485 | C | G | exonic   | nonsynonymous SNV | PARP4    | NM_006437:c.G3794C:p.G1265A   | rs1050110   | 1    | P9 |
| chr13 | 46367941 | 46367941 | G | A | exonic   | synonymous SNV    | HTR2A    | NM_000621:c.C102T:p.S34S      | rs6313      |      | P9 |
| chr15 | 26096204 | 26096204 | C | T | exonic   | synonymous SNV    | HERC2    | NM_004667:c.G9210A:p.S3070S   | rs61756153  |      | P9 |
| chr15 | 65244452 | 65244452 | C | A | exonic   | synonymous SNV    | SMAD3    | NM_001145102:c.C57A:p.P19P    |             |      | P9 |
| chr15 | 67112635 | 67112635 | C | T | exonic   | synonymous SNV    | NOX5     | NM_001184779:c.C735T:p.C245C  | rs311893    |      | P9 |
| chr15 | 67126841 | 67126841 | G | A | exonic   | nonsynonymous SNV | NOX5     | NM_001184779:c.G1643A:p.R548H | rs2277552   |      | P9 |
| chr15 | 75131848 | 75131848 | T | A | exonic   | synonymous SNV    | TSPAN3   | NM_001168412:c.A411T:p.V137V  | rs11737     |      | P9 |
| chr16 | 23108262 | 23108262 | T | C | exonic   | synonymous SNV    | SCNN1G   | NM_001039:c.T387C:p.Y129Y     | rs5734      |      | P9 |
| chr16 | 60448534 | 60448534 | C | A | exonic   | nonsynonymous SNV | CDH8     | NM_001796:c.G657T:p.E219D     |             | 0.51 | P9 |
| chr17 | 1508390  | 1508390  | G | A | exonic   | synonymous SNV    | PRPF8    | NM_006445:c.C5412T:p.N1804N   |             |      | P9 |
| chr17 | 7519223  | 7519223  | C | G | exonic   | nonsynonymous SNV | TP53     | NM_001126115:c.G36C:p.Q12H    |             | 0    | P9 |
| chr17 | 7519224  | 7519224  | T | G | exonic   | nonsynonymous SNV | TP53     | NM_001126115:c.A35C:p.Q12P    |             | 0.01 | P9 |
| chr17 | 10162874 | 10162874 | A | G | exonic   | synonymous SNV    | MYH13    | NM_003802:c.T3696C:p.I1232I   | rs2074873   |      | P9 |
| chr17 | 10244699 | 10244699 | G | A | exonic   | synonymous SNV    | MYH8     | NM_002472:c.C3468T:p.A1156A   |             |      | P9 |
| chr17 | 10353533 | 10353533 | G | A | exonic   | synonymous SNV    | MYH1     | NM_005963:c.C1581T:p.I527I    | rs117737350 |      | P9 |
| chr17 | 10484188 | 10484188 | T | C | exonic   | synonymous SNV    | MYH3     | NM_002470:c.A2532G:p.A844A    | rs2285469   |      | P9 |
| chr17 | 26577611 | 26577611 | G | A | exonic   | synonymous SNV    | NF1      | NM_000267:c.G2034A:p.P678P    | rs2285892   |      | P9 |
| chr17 | 38499208 | 38499208 | C | T | exonic   | synonymous SNV    | BRCA1    | NM_007297:c.G1725A:p.A575A    |             |      | P9 |
| chr17 | 75920466 | 75920466 | G | A | exonic   | nonsynonymous SNV | RNF213   | NM_020914:c.G3730A:p.V1244M   | rs10782008  |      | P9 |
| chr17 | 75920697 | 75920697 | G | C | exonic   | nonsynonymous SNV | RNF213   | NM_020914:c.G3961C:p.E1321Q   | rs9913636   |      | P9 |
| chr17 | 75920875 | 75920875 | A | G | exonic   | nonsynonymous SNV | RNF213   | NM_020914:c.A4139G:p.D1380G   | rs8074015   |      | P9 |
| chr17 | 75920990 | 75920990 | C | T | exonic   | synonymous SNV    | RNF213   | NM_020914:c.C4254T:p.N1418N   |             |      | P9 |
| chr17 | 75926103 | 75926103 | G | A | exonic   | synonymous SNV    | RNF213   | NM_020914:c.G4797A:p.A1599A   | rs4890009   |      | P9 |
| chr17 | 75933731 | 75933731 | G | A | exonic   | nonsynonymous SNV | RNF213   | NM_020914:c.G7148A:p.S2383N   | rs9674961   | 0.44 | P9 |
| chr17 | 75933975 | 75933975 | G | C | exonic   | synonymous SNV    | RNF213   | NM_020914:c.G7392C:p.P2464P   | rs4890012   |      | P9 |
| chr18 | 6973194  | 6973194  | G | T | exonic   | synonymous SNV    | LAMA1    | NM_005559:c.C5700A:p.T1900T   | rs11661974  |      | P9 |
| chr18 | 49177711 | 49177711 | A | G | exonic   | synonymous SNV    | DCC      | NM_005215:c.A2724G:p.T908T    |             |      | P9 |
| chr18 | 49190992 | 49190992 | T | C | exonic   | synonymous SNV    | DCC      | NM_005215:c.T3108C:p.P1036P   | rs34395300  |      | P9 |
| chr18 | 59321701 | 59321701 | T | C | exonic   | synonymous SNV    | SERPINB5 | NM_002639:c.T894C:p.S298S     | rs1455556   |      | P9 |
| chr18 | 59321762 | 59321762 | A | G | exonic   | nonsynonymous SNV | SERPINB5 | NM_002639:c.A955G:p.I319V     | rs1455555   |      | P9 |
| chr19 | 7882201  | 7882201  | C | T | exonic   | synonymous SNV    | MAP2K7   | NM_145185:c.C922T:p.L308L     | rs56278855  |      | P9 |
| chr19 | 43682454 | 43682454 | C | T | exonic   | synonymous SNV    | RYR1     | NM_000540:c.C7281T:p.A2427A   | rs77310009  |      | P9 |
| chr19 | 43683356 | 43683356 | G | A | exonic   | synonymous SNV    | RYR1     | NM_000540:c.G7500A:p.A2500A   | rs2228072   |      | P9 |
| chr19 | 43683383 | 43683383 | G | A | exonic   | synonymous SNV    | RYR1     | NM_000540:c.G7527A:p.V2509V   | rs2071088   |      | P9 |
| chr19 | 43683440 | 43683440 | C | T | exonic   | synonymous SNV    | RYR1     | NM_000540:c.C7584T:p.P2528P   | rs1465698   |      | P9 |
| chr19 | 43701893 | 43701893 | C | T | exonic   | synonymous SNV    | RYR1     | NM_000540:c.C10218T:p.Y3406Y  | rs41274330  |      | P9 |
| chr19 | 48464110 | 48464110 | G | T | exonic   | synonymous SNV    | PSG9     | NM_002784:c.C96A:p.T32T       | rs3746296   |      | P9 |
| chr19 | 48464142 | 48464142 | C | T | splicing |                   | PSG9     |                               | rs3746297   |      | P9 |
| chr19 | 48465372 | 48465372 | G | C | exonic   | nonsynonymous SNV | PSG9     | NM_002784:c.C52G:p.L18V       | rs8101191   | 0.07 | P9 |
| chr19 | 48465412 | 48465412 | G | A | exonic   | synonymous SNV    | PSG9     | NM_002784:c.C12T:p.L4L        | rs8101210   |      | P9 |
| chr19 | 59973127 | 59973127 | G | T | exonic   | nonsynonymous SNV | KIR2DL1  | NM_014218:c.G13T:p.V5F        | rs2304224   | 0.02 | P9 |
| chr19 | 60069820 | 60069820 | C | T | exonic   | nonsynonymous SNV | KIR3DL2  | NM_006737:c.C1190T:p.T397M    | rs3745902   | 0.01 | P9 |
| chr19 | 60069945 | 60069945 | A | C | exonic   | nonsynonymous SNV | KIR3DL2  | NM_006737:c.A1315C:p.K439Q    | rs3745903   | 0.01 | P9 |
| chr20 | 23369101 | 23369101 | G | A | exonic   | nonsynonymous SNV | CSTL1    | NM_138283:c.G197A:p.R66K      | rs17757442  | 0.58 | P9 |
| chr20 | 23372638 | 23372638 | C | T | exonic   | nonsynonymous SNV | CSTL1    | NM_138283:c.C287T:p.T96M      | rs3746737   | 0.01 | P9 |

|       |          |          |   |   |                 |                           |                                          |      |      |
|-------|----------|----------|---|---|-----------------|---------------------------|------------------------------------------|------|------|
| chr20 | 32801057 | 32801057 | A | G | exonic          | nonsynonymous SN\ NCOA6   | NM_014071:c.T2602C;p.C868R               | 0    | P9   |
| chr20 | 32801154 | 32801154 | G | C | exonic          | synonymous SNV NCOA6      | NM_014071:c.C2505G;p.A835A               |      | P9   |
| chr22 | 39873895 | 39873895 | C | T | exonic;splicing | nonsynonymous SN\ EP300   | NM_001429:c.C2240T;p.P747L               | 0.05 | P9   |
| chr22 | 39877954 | 39877954 | A | G | exonic          | nonsynonymous SN\ EP300   | NM_001429:c.A2989G;p.1997V rs20551       | 0.29 | P9   |
| chrX  | 19343256 | 19343256 | G | A | exonic          | nonsynonymous SN\ MAP3K15 | NM_001001671:c.C1480T;p.R494C rs41305349 |      | P9   |
| chrX  | 19392397 | 19392397 | C | T | exonic          | nonsynonymous SN\ MAP3K15 | NM_001001671:c.G574A;p.A192T rs5909299   |      | P9   |
| chrX  | 31607557 | 31607557 | A | G | exonic          | synonymous SNV DMD        | NM_004013:c.T348C;p.N116N rs1801188      |      | P9   |
| chrX  | 63405536 | 63405536 | C | G | exonic          | nonsynonymous SN\ MTMR8   | NM_017677:c.G1721C;p.G574A               | 0.01 | P9   |
| chrX  | 1.52E+08 | 1.52E+08 | G | C | exonic          | synonymous SNV ATP2B3     | NM_001001344:c.G2592C;p.V864 rs2269415   |      | P9   |
| chr2  | 1.7E+08  | 1.7E+08  | G | A | exonic          | nonsynonymous SN\ LRP2    | NM_004525:c.C100T;p.R34C                 | 0.01 | P8   |
| chr5  | 1.4E+08  | 1.4E+08  | G | A | exonic          | synonymous SNV PCDHA3     | NM_018906:c.G1527A;p.S509S               |      | P8   |
| chr9  | 1.37E+08 | 1.37E+08 | G | A | exonic          | synonymous SNV COL5A1     | NM_000093:c.G762A;p.S254S                |      | P8   |
| chr12 | 25269829 | 25269829 | C | T | exonic          | nonsynonymous SN\ KRAS    | NM_004985:c.G436A;p.A146T                | 0.01 | P8   |
| chr17 | 59121468 | 59121468 | G | A | exonic          | synonymous SNV MAP3K3     | NM_002401:c.G1176A;p.Q392Q               |      | P8   |
| chrX  | 1.54E+08 | 1.54E+08 | C | T | exonic          | nonsynonymous SN\ F8      | NM_000132:c.G2150A;p.R717Q               | 0.32 | P8   |
| chr1  | 1.84E+08 | 1.84E+08 | G | A | exonic          | nonsynonymous SN\ HMCN1   | NM_031935:c.G6250A;p.V2084M              | 0.03 | P57  |
| chr3  | 41243716 | 41243716 | C | G | exonic          | nonsynonymous SN\ CTNNB1  | NM_001098209:c.C950G;p.A317G             | 0.04 | P57  |
| chr3  | 1.25E+08 | 1.25E+08 | G | T | exonic          | synonymous SNV MYLK       | NM_053026:c.C2646A;p.V882V               |      | P57  |
| chr5  | 1.12E+08 | 1.12E+08 | G | T | exonic          | stopgain SNV APC          | NM_001127511:c.G3796T;p.E1266X           | 0.04 | P57  |
| chr7  | 98331326 | 98331326 | C | A | exonic          | nonsynonymous SN\ TRRAP   | NM_003496:c.C454A;p.H152N                | 0.02 | P57  |
| chr18 | 7026000  | 7026000  | C | G | exonic          | nonsynonymous SN\ LAMA1   | NM_005559:c.G1825C;p.D609H               | 0.19 | P57  |
| chr1  | 2.14E+08 | 2.14E+08 | C | T | exonic          | nonsynonymous SN\ USH2A   | NM_007123:c.G4571A;p.G1524E              | 0    | P56  |
| chr2  | 15561736 | 15561736 | C | T | exonic          | nonsynonymous SN\ NBAS    | NM_015909:c.G938A;p.R313H                | 0.19 | P56  |
| chr5  | 1.12E+08 | 1.12E+08 | C | T | exonic          | stopgain SNV APC          | NM_001127511:c.C667T;p.R223X             | 0    | P56  |
| chr14 | 19735928 | 19735928 | C | T | exonic          | synonymous SNV OR11G2     | NM_001005503:c.C594T;p.I198I             |      | P56  |
| chr17 | 7518988  | 7518988  | G | A | exonic          | stopgain SNV TP53         | NM_001126115:c.C190T;p.R64X              | 0    | P56  |
| chr12 | 74043176 | 74043176 | C | T | exonic          | synonymous SNV GLIPR1L1   | NM_152779:c.C549T;p.Y183Y                |      | P54  |
| chr12 | 25289551 | 25289551 | C | A | exonic          | nonsynonymous SN\ KRAS    | NM_004985:c.G35T;p.G12V                  | 0    | P53  |
| chr17 | 7519176  | 7519176  | A | C | exonic          | nonsynonymous SN\ TP53    | NM_001126115:c.T83G;p.M28R               | 0    | P53  |
| chr2  | 2.38E+08 | 2.38E+08 | G | A | exonic          | synonymous SNV COL6A3     | NM_057165:c.C501T;p.S167S                |      | P52  |
| chr10 | 55370633 | 55370633 | T | C | exonic;splicing | synonymous SNV PCDH15     | NM_001142765:c.A3018G;p.E1006E           |      | P52  |
| chr12 | 25289551 | 25289551 | C | A | exonic          | nonsynonymous SN\ KRAS    | NM_004985:c.G35T;p.G12V                  | 0    | P52  |
| chr17 | 7519131  | 7519131  | C | T | exonic          | nonsynonymous SN\ TP53    | NM_001126115:c.G128A;p.R43H rs28934578   | 0    | P52  |
| chr5  | 24523757 | 24523757 | G | T | exonic          | nonsynonymous SN\ CDH10   | NM_006727:c.C2139A;p.F713L               | 0.08 | P51  |
| chr5  | 1.4E+08  | 1.4E+08  | G | A | exonic          | nonsynonymous SN\ PCDHA1  | NM_018900:c.G1375A;p.E459K               | 0.15 | P51  |
| chr17 | 7517819  | 7517819  | G | A | exonic          | nonsynonymous SN\ TP53    | NM_001126115:c.C448T;p.R150W rs28934574  | 0    | P51  |
| chr5  | 1.12E+08 | 1.12E+08 | C | T | exonic;splicing | stopgain SNV APC          | NM_000038:c.C646T;p.R216X rs62619935     | 0.19 | P125 |
| chr6  | 1.47E+08 | 1.47E+08 | C | T | exonic          | synonymous SNV GRM1       | NM_000838:c.C726T;p.D242D                |      | P125 |
| chr12 | 25289552 | 25289552 | C | T | exonic          | nonsynonymous SN\ KRAS    | NM_004985:c.G34A;p.G12S                  | 0    | P125 |
| chr15 | 64561185 | 64561185 | G | A | exonic          | nonsynonymous SN\ MAP2K1  | NM_002755:c.G607A;p.E203K                | 0.01 | P125 |
| chr18 | 7557841  | 7557841  | G | A | exonic          | nonsynonymous SN\ PTPRM   | NM_001105244:c.G25A;p.A9T                | 0.07 | P125 |
| chr8  | 1.09E+08 | 1.09E+08 | C | T | exonic          | nonsynonymous SN\ RSP02   | NM_178565:c.G454A;p.E152K                | 0.48 | P118 |
| chr12 | 25289551 | 25289551 | C | A | exonic          | nonsynonymous SN\ KRAS    | NM_004985:c.G35T;p.G12V                  | 0    | P118 |
| chr13 | 93929396 | 93929396 | C | G | exonic          | nonsynonymous SN\ DCT     | NM_001129889:c.G115C;p.E39Q              | 0.19 | P118 |
| chr20 | 2729106  | 2729106  | G | C | exonic          | nonsynonymous SN\ CPXM1   | NM_001184699:c.C113G;p.P38R              |      | P118 |
| chr2  | 39092904 | 39092904 | T | C | exonic          | nonsynonymous SN\ SOS1    | NM_005633:c.A2257G;p.T753A               | 0.59 | P96  |
| chr2  | 1.7E+08  | 1.7E+08  | G | A | exonic          | synonymous SNV LRP2       | NM_004525:c.C909T;p.T303T                |      | P96  |
| chr5  | 1.12E+08 | 1.12E+08 | C | T | exonic          | stopgain SNV APC          | NM_001127511:c.C1606T;p.R536X            | 0.02 | P96  |
| chr5  | 1.41E+08 | 1.41E+08 | A | G | exonic          | nonsynonymous SN\ PCDHB15 | NM_018935:c.A1196G;p.N399S               | 0    | P96  |
| chr12 | 1.31E+08 | 1.31E+08 | C | T | exonic          | synonymous SNV EP400      | NM_015409:c.C1344T;p.L448L               |      | P96  |
| chr17 | 7519217  | 7519217  | C | T | exonic          | stopgain SNV TP53         | NM_001126115:c.G42A;p.W14X               | 0.02 | P96  |
| chr4  | 1.27E+08 | 1.27E+08 | G | T | exonic          | nonsynonymous SN\ FAT4    | NM_024582:c.G14757T;p.M4919I             | 0.42 | P59  |
| chr12 | 25289551 | 25289551 | C | A | exonic          | nonsynonymous SN\ KRAS    | NM_004985:c.G35T;p.G12V                  | 0    | P59  |

|       |          |          |   |   |                 |                   |         |                                |             |      |      |
|-------|----------|----------|---|---|-----------------|-------------------|---------|--------------------------------|-------------|------|------|
| chr17 | 7517845  | 7517845  | C | T | exonic          | nonsynonymous SN\ | TP53    | NM_001126115:c.G422A:p.R141H   | rs28934576  | 0.01 | P59  |
| chr17 | 7519131  | 7519131  | C | T | exonic          | nonsynonymous SN\ | TP53    | NM_001126115:c.G128A:p.R43H    | rs28934578  | 0    | P1   |
| chr1  | 1.84E+08 | 1.84E+08 | C | A | exonic          | nonsynonymous SN\ | HMCN1   | NM_031935:c.C13672A:p.Q4558K   |             | 1    | P135 |
| chr5  | 26917100 | 26917100 | C | T | exonic          | nonsynonymous SN\ | CDH9    | NM_016279:c.G2272A:p.A758T     |             | 1    | P135 |
| chr5  | 1.69E+08 | 1.69E+08 | C | T | exonic          | nonsynonymous SN\ | DOCK2   | NM_004946:c.C901T:p.R301W      |             | 0    | P135 |
| chr6  | 1.47E+08 | 1.47E+08 | G | T | exonic          | nonsynonymous SN\ | GRM1    | NM_000838:c.G893T:p.G298V      |             | 0.06 | P135 |
| chr12 | 25289551 | 25289551 | C | T | exonic          | nonsynonymous SN\ | KRAS    | NM_004985:c.G35A:p.G12D        |             | 0    | P135 |
| chr17 | 7518323  | 7518323  | T | C | exonic          | nonsynonymous SN\ | TP53    | NM_001126115:c.A287G:p.D96G    |             | 0.05 | P135 |
| chr1  | 11211508 | 11211508 | T | C | exonic          | nonsynonymous SN\ | MTOR    | NM_004958:c.A2834G:p.E945G     |             | 0    | P134 |
| chr1  | 69998635 | 69998635 | G | T | exonic          | nonsynonymous SN\ | LRRC7   | NM_020794:c.G160T:p.D54Y       |             | 0.02 | P134 |
| chr1  | 70276403 | 70276403 | C | T | exonic          | stopgain SNV      | LRRC7   | NM_020794:c.C2194T:p.Q732X     |             | 0    | P134 |
| chr1  | 70277098 | 70277098 | A | G | exonic          | nonsynonymous SN\ | LRRC7   | NM_020794:c.A2889G:p.I963M     |             | 0    | P134 |
| chr1  | 1.57E+08 | 1.57E+08 | A | G | splicing        |                   | SPTA1   |                                |             |      | P134 |
| chr1  | 1.84E+08 | 1.84E+08 | T | C | exonic          | synonymous SNV    | HMCN1   | NM_031935:c.T6216C:p.S2072S    |             |      | P134 |
| chr1  | 1.84E+08 | 1.84E+08 | G | A | exonic          | nonsynonymous SN\ | HMCN1   | NM_031935:c.G9572A:p.R3191H    |             | 0.11 | P134 |
| chr1  | 1.84E+08 | 1.84E+08 | T | C | exonic          | nonsynonymous SN\ | HMCN1   | NM_031935:c.T15229C:p.F5077L   |             | 0.04 | P134 |
| chr1  | 2.14E+08 | 2.14E+08 | T | C | exonic          | nonsynonymous SN\ | USH2A   | NM_206933:c.A12058G:p.T4020A   |             | 0.11 | P134 |
| chr1  | 2.14E+08 | 2.14E+08 | T | C | exonic          | nonsynonymous SN\ | USH2A   | NM_206933:c.A9944G:p.Y3315C    |             | 0    | P134 |
| chr1  | 2.46E+08 | 2.46E+08 | A | G | exonic          | synonymous SNV    | OR2M5   | NM_001004690:c.A6G:p.A2A       |             |      | P134 |
| chr2  | 15333271 | 15333271 | C | T | exonic          | nonsynonymous SN\ | NBAS    | NM_015909:c.G5512A:p.G1838R    |             | 0    | P134 |
| chr2  | 15411254 | 15411254 | C | T | exonic          | synonymous SNV    | NBAS    | NM_015909:c.G3963A:p.Q1321Q    |             |      | P134 |
| chr2  | 15473293 | 15473293 | C | G | exonic;splicing | nonsynonymous SN\ | NBAS    | NM_015909:c.G2765C:p.C922S     |             | 0.64 | P134 |
| chr2  | 1.05E+08 | 1.05E+08 | G | A | exonic          | synonymous SNV    | FHL2    | NM_001450:c.C744T:p.C248C      |             |      | P134 |
| chr2  | 1.7E+08  | 1.7E+08  | A | G | exonic          | nonsynonymous SN\ | LRP2    | NM_004525:c.T9109C:p.F3037L    |             | 0    | P134 |
| chr2  | 1.7E+08  | 1.7E+08  | G | A | exonic          | synonymous SNV    | LRP2    | NM_004525:c.C3711T:p.C1237C    |             |      | P134 |
| chr2  | 2.02E+08 | 2.02E+08 | G | A | exonic          | nonsynonymous SN\ | CASP8   | NM_033356:c.G1201A:p.A401T     |             | 0.58 | P134 |
| chr2  | 2.03E+08 | 2.03E+08 | G | A | exonic          | nonsynonymous SN\ | FZD7    | NM_003507:c.G968A:p.G323D      |             | 0.23 | P134 |
| chr2  | 2.12E+08 | 2.12E+08 | G | A | exonic          | nonsynonymous SN\ | ERBB4   | NM_001042599:c.C851T:p.T284I   |             | 0.02 | P134 |
| chr2  | 2.38E+08 | 2.38E+08 | A | G | exonic          | synonymous SNV    | COL6A3  | NM_057166:c.T6765C:p.V2255V    |             |      | P134 |
| chr2  | 2.38E+08 | 2.38E+08 | C | T | exonic          | synonymous SNV    | COL6A3  | NM_057166:c.G3567A:p.A1189A    | rs116565519 |      | P134 |
| chr3  | 10357184 | 10357184 | G | A | exonic          | nonsynonymous SN\ | ATP2B2  | NM_001683:c.C2987T:p.A996V     |             | 0.75 | P134 |
| chr3  | 58042487 | 58042487 | C | T | exonic          | nonsynonymous SN\ | FLNB    | NM_001164317:c.C731T:p.P244L   |             | 0    | P134 |
| chr3  | 1.25E+08 | 1.25E+08 | G | A | exonic          | synonymous SNV    | MYLK    | NM_053026:c.C3951T:p.S1317S    |             |      | P134 |
| chr3  | 1.53E+08 | 1.53E+08 | C | T | exonic          | nonsynonymous SN\ | IGSF10  | NM_178822:c.G3062A:p.R1021Q    | rs35114212  | 0    | P134 |
| chr3  | 1.53E+08 | 1.53E+08 | A | G | exonic          | nonsynonymous SN\ | IGSF10  | NM_178822:c.T1061C:p.L354P     |             | 0    | P134 |
| chr4  | 54828585 | 54828585 | A | T | exonic          | synonymous SNV    | PDGFRA  | NM_006206:c.A1041T:p.I347I     |             |      | P134 |
| chr4  | 1.27E+08 | 1.27E+08 | G | T | exonic          | nonsynonymous SN\ | FAT4    | NM_024582:c.G9186T:p.K3062N    |             | 0.27 | P134 |
| chr4  | 1.55E+08 | 1.55E+08 | T | C | exonic          | nonsynonymous SN\ | DCHS2   | NM_017639:c.A4483G:p.T1495A    |             | 0.5  | P134 |
| chr4  | 1.55E+08 | 1.55E+08 | A | G | exonic          | nonsynonymous SN\ | DCHS2   | NM_017639:c.T3317C:p.L1106P    |             | 0.37 | P134 |
| chr4  | 1.56E+08 | 1.56E+08 | C | T | exonic          | synonymous SNV    | DCHS2   | NM_001142552:c.G2022A:p.E674E  |             |      | P134 |
| chr4  | 1.56E+08 | 1.56E+08 | A | G | exonic          | nonsynonymous SN\ | DCHS2   | NM_001142552:c.T1732C:p.Y578H  |             | 0    | P134 |
| chr4  | 1.57E+08 | 1.57E+08 | C | T | exonic          | nonsynonymous SN\ | GUCY1A3 | NM_001130684:c.C262T:p.R88W    |             | 0    | P134 |
| chr5  | 24541033 | 24541033 | A | T | exonic          | synonymous SNV    | CDH10   | NM_006727:c.T1338A:p.P446P     |             |      | P134 |
| chr5  | 26921951 | 26921951 | T | A | splicing        |                   | CDH9    |                                |             |      | P134 |
| chr5  | 82853812 | 82853812 | C | T | exonic          | stopgain SNV      | VCAN    | NM_001164098:c.C3931T:p.Q1311X |             | 0.11 | P134 |
| chr5  | 82879655 | 82879655 | G | A | exonic          | synonymous SNV    | VCAN    | NM_001126336:c.G1266A:p.E422E  |             |      | P134 |
| chr5  | 1.38E+08 | 1.38E+08 | T | C | exonic          | synonymous SNV    | CTNNA1  | NM_001903:c.T1011C:p.C337C     |             |      | P134 |
| chr5  | 1.4E+08  | 1.4E+08  | T | C | exonic          | synonymous SNV    | PCDHA1  | NM_018900:c.T1209C:p.N403N     |             |      | P134 |
| chr5  | 1.4E+08  | 1.4E+08  | G | A | exonic          | nonsynonymous SN\ | PCDHA7  | NM_018910:c.G1637A:p.G546D     |             | 0.03 | P134 |
| chr5  | 1.4E+08  | 1.4E+08  | G | A | exonic          | nonsynonymous SN\ | PCDHA7  | NM_018910:c.G1795A:p.A599T     |             | 0.01 | P134 |
| chr5  | 1.4E+08  | 1.4E+08  | G | A | exonic          | nonsynonymous SN\ | PCDHA8  | NM_018911:c.G2198A:p.R733Q     |             | 0.2  | P134 |
| chr5  | 1.4E+08  | 1.4E+08  | C | T | exonic          | synonymous SNV    | PCDHA9  | NM_014005:c.C1506T:p.R502R     |             |      | P134 |
| chr5  | 1.4E+08  | 1.4E+08  | C | T | exonic          | nonsynonymous SN\ | PCDHA11 | NM_018902:c.C1927T:p.R643C     |             |      | P134 |

|       |          |          |   |   |                 |                   |         |                                 |      |      |
|-------|----------|----------|---|---|-----------------|-------------------|---------|---------------------------------|------|------|
| chr5  | 1.4E+08  | 1.4E+08  | C | T | exonic          | nonsynonymous SN\ | PCDHAC1 | NM_018898:c.C20T;p.A7V          | 0.48 | P134 |
| chr5  | 1.4E+08  | 1.4E+08  | C | A | exonic          | nonsynonymous SN\ | PCDHAC1 | NM_018898:c.C126A;p.D42E        | 0.03 | P134 |
| chr5  | 1.41E+08 | 1.41E+08 | A | G | exonic          | nonsynonymous SN\ | PCDHB7  | NM_018940:c.A923G;p.D308G       | 0    | P134 |
| chr5  | 1.41E+08 | 1.41E+08 | G | A | exonic          | synonymous SNV    | PCDHB16 | NM_020957:c.G2307A;p.P769P      |      | P134 |
| chr5  | 1.41E+08 | 1.41E+08 | A | G | exonic          | nonsynonymous SN\ | PCDHB13 | NM_018933:c.A865G;p.I289V       | 0.54 | P134 |
| chr5  | 1.51E+08 | 1.51E+08 | C | T | exonic          | synonymous SNV    | FAT2    | NM_001447:c.G12456A;p.A4152A    |      | P134 |
| chr5  | 1.51E+08 | 1.51E+08 | G | A | exonic          | synonymous SNV    | FAT2    | NM_001447:c.C6894T;p.D2298D     |      | P134 |
| chr5  | 1.51E+08 | 1.51E+08 | T | G | exonic          | nonsynonymous SN\ | FAT2    | NM_001447:c.A3008C;p.D1003A     | 0.13 | P134 |
| chr5  | 1.69E+08 | 1.69E+08 | T | C | exonic          | nonsynonymous SN\ | DOCK2   | NM_004946:c.T49C;p.Y17H         | 0.09 | P134 |
| chr5  | 1.69E+08 | 1.69E+08 | G | A | exonic          | nonsynonymous SN\ | DOCK2   | NM_004946:c.G1216A;p.V406M      | 0.05 | P134 |
| chr5  | 1.69E+08 | 1.69E+08 | A | T | exonic          | nonsynonymous SN\ | DOCK2   | NM_004946:c.A3742T;p.T1248S     | 0.49 | P134 |
| chr6  | 1.12E+08 | 1.12E+08 | C | T | exonic          | nonsynonymous SN\ | FYN     | NM_153047:c.G916A;p.E306K       | 0.22 | P134 |
| chr6  | 1.3E+08  | 1.3E+08  | A | G | exonic          | nonsynonymous SN\ | LAMA2   | NM_000426:c.A6116G;p.D2039G     | 0.16 | P134 |
| chr6  | 1.47E+08 | 1.47E+08 | C | T | exonic          | synonymous SNV    | GRM1    | NM_000838:c.C1344T;p.S448S      |      | P134 |
| chr6  | 1.47E+08 | 1.47E+08 | C | A | exonic          | nonsynonymous SN\ | GRM1    | NM_000838:c.C1711A;p.P571T      | 0    | P134 |
| chr6  | 1.53E+08 | 1.53E+08 | A | G | exonic;splicing | nonsynonymous SN\ | SYNE1   | NM_015293:c.T4925C;p.V1642A     | 0.01 | P134 |
| chr6  | 1.53E+08 | 1.53E+08 | T | C | exonic          | nonsynonymous SN\ | SYNE1   | NM_015293:c.A3137G;p.Q1046R     | 0    | P134 |
| chr6  | 1.53E+08 | 1.53E+08 | C | T | exonic          | nonsynonymous SN\ | SYNE1   | NM_033071:c.G15304A;p.G5102R    | 0.01 | P134 |
| chr6  | 1.53E+08 | 1.53E+08 | A | G | exonic          | nonsynonymous SN\ | SYNE1   | NM_033071:c.T12655C;p.Y4219H    | 0.26 | P134 |
| chr6  | 1.53E+08 | 1.53E+08 | T | C | exonic          | nonsynonymous SN\ | SYNE1   | NM_033071:c.A1130G;p.Q377R      | 0    | P134 |
| chr6  | 1.66E+08 | 1.66E+08 | C | T | exonic          | nonsynonymous SN\ | PDE10A  | NM_001130690:c.G718A;p.A240T    | 0.04 | P134 |
| chr6  | 1.66E+08 | 1.66E+08 | T | C | exonic          | synonymous SNV    | PDE10A  | NM_001130690:c.A12G;p.G4G       |      | P134 |
| chr6  | 1.69E+08 | 1.69E+08 | C | T | exonic          | nonsynonymous SN\ | THBS2   | NM_003247:c.G2995A;p.A999T      | 0    | P134 |
| chr6  | 1.69E+08 | 1.69E+08 | G | C | exonic          | nonsynonymous SN\ | THBS2   | NM_003247:c.C1284G;p.S428R      | 0.09 | P134 |
| chr7  | 91481509 | 91481509 | A | G | exonic          | synonymous SNV    | AKAP9   | NM_005751:c.A3543G;p.G1181G     |      | P134 |
| chr7  | 91490198 | 91490198 | G | A | exonic          | nonsynonymous SN\ | AKAP9   | NM_005751:c.G4087A;p.A1363T     | 0    | P134 |
| chr7  | 91546828 | 91546828 | A | G | exonic          | nonsynonymous SN\ | AKAP9   | NM_005751:c.A7445G;p.Y2482C     | 0.18 | P134 |
| chr7  | 93883659 | 93883659 | C | T | exonic          | nonsynonymous SN\ | COL1A2  | NM_000089:c.C1771T;p.R591C      | 0    | P134 |
| chr7  | 93885053 | 93885053 | G | T | exonic          | nonsynonymous SN\ | COL1A2  | NM_000089:c.G1945T;p.G649C      | 0    | P134 |
| chr7  | 98357483 | 98357483 | A | G | exonic          | nonsynonymous SN\ | TRRAP   | NM_003496:c.A2794G;p.K932E      | 0.54 | P134 |
| chr7  | 98388764 | 98388764 | G | A | exonic          | synonymous SNV    | TRRAP   | NM_003496:c.G5427A;p.S1809S     |      | P134 |
| chr7  | 98424404 | 98424404 | A | T | exonic          | nonsynonymous SN\ | TRRAP   | NM_003496:c.A9395T;p.D3132V     | 0.06 | P134 |
| chr7  | 1E+08    | 1E+08    | G | T | exonic          | nonsynonymous SN\ | MUC17   | NM_001040105:c.G1758T;p.E586D   |      | P134 |
| chr7  | 1E+08    | 1E+08    | A | C | exonic          | nonsynonymous SN\ | MUC17   | NM_001040105:c.A2689C;p.T897P   |      | P134 |
| chr7  | 1E+08    | 1E+08    | T | C | exonic          | nonsynonymous SN\ | MUC17   | NM_001040105:c.T3095C;p.M1032T  | 0.86 | P134 |
| chr7  | 1E+08    | 1E+08    | T | C | exonic          | synonymous SNV    | MUC17   | NM_001040105:c.T5763C;p.P1921P  |      | P134 |
| chr7  | 1E+08    | 1E+08    | C | T | exonic          | nonsynonymous SN\ | MUC17   | NM_001040105:c.C12937T;p.P4313S |      | P134 |
| chr7  | 1.51E+08 | 1.51E+08 | T | C | exonic          | nonsynonymous SN\ | MLL3    | NM_170606:c.A9532G;p.K3178E     | 0.07 | P134 |
| chr7  | 1.52E+08 | 1.52E+08 | G | A | exonic          | synonymous SNV    | MLL3    | NM_170606:c.C7236T;p.P2412P     |      | P134 |
| chr7  | 1.52E+08 | 1.52E+08 | C | T | exonic          | synonymous SNV    | MLL3    | NM_170606:c.G5547A;p.K1849K     |      | P134 |
| chr8  | 41932049 | 41932049 | C | T | exonic          | nonsynonymous SN\ | MYST3   | NM_006766:c.G1520A;p.R507H      | 0.02 | P134 |
| chr9  | 96913630 | 96913630 | A | G | exonic          | nonsynonymous SN\ | FANCC   | NM_000136:c.T1265C;p.L422P      | 0    | P134 |
| chr9  | 96913734 | 96913734 | G | A | exonic          | synonymous SNV    | FANCC   | NM_000136:c.C1161T;p.C387C      |      | P134 |
| chr9  | 1.17E+08 | 1.17E+08 | G | A | exonic          | synonymous SNV    | TNC     | NM_002160:c.C1305T;p.S435S      |      | P134 |
| chr9  | 1.37E+08 | 1.37E+08 | T | C | exonic          | nonsynonymous SN\ | COL5A1  | NM_000093:c.T820C;p.Y274H       | 0.15 | P134 |
| chr9  | 1.37E+08 | 1.37E+08 | G | A | exonic          | nonsynonymous SN\ | COL5A1  | NM_000093:c.G1781A;p.R594Q      | 0    | P134 |
| chr9  | 1.37E+08 | 1.37E+08 | T | C | exonic          | synonymous SNV    | COL5A1  | NM_000093:c.T1845C;p.D615D      |      | P134 |
| chr9  | 1.37E+08 | 1.37E+08 | C | T | exonic          | nonsynonymous SN\ | COL5A1  | NM_000093:c.C2156T;p.P719L      | 0    | P134 |
| chr9  | 1.37E+08 | 1.37E+08 | C | T | exonic          | nonsynonymous SN\ | COL5A1  | NM_000093:c.C4882T;p.P1628S     | 0    | P134 |
| chr9  | 1.37E+08 | 1.37E+08 | A | T | exonic          | nonsynonymous SN\ | COL5A1  | NM_000093:c.A5441T;p.D1814V     | 0    | P134 |
| chr10 | 5237729  | 5237729  | A | G | exonic          | nonsynonymous SN\ | AKR1C4  | NM_001818:c.A379G;p.T127A       | 0.18 | P134 |
| chr10 | 28191461 | 28191461 | C | T | exonic          | nonsynonymous SN\ | ARMC4   | NM_018076:c.G2707A;p.A903T      | 0.01 | P134 |
| chr10 | 35969237 | 35969237 | T | C | exonic          | nonsynonymous SN\ | FZD8    | NM_031866:c.A1127G;p.Y376C      | 0.17 | P134 |

|       |          |          |   |   |          |                            |                                |             |      |      |
|-------|----------|----------|---|---|----------|----------------------------|--------------------------------|-------------|------|------|
| chr10 | 35969652 | 35969652 | T | C | exonic   | nonsynonymous SN\ FZD8     | NM_031866:c.A712G:p.M238V      | 0.1         | P134 |      |
| chr10 | 52504543 | 52504543 | C | T | exonic   | stopgain SNV PRKG1         | NM_006258:c.C187T:p.Q63X       | 0.75        | P134 |      |
| chr10 | 55251750 | 55251750 | T | C | exonic   | synonymous SNV PCDH15      | NM_001142767:c.A5622G;p.E1874E |             | P134 |      |
| chr10 | 55614958 | 55614958 | C | T | exonic   | nonsynonymous SN\ PCDH15   | NM_001142767:c.G1271A;p.R424H  | 0           | P134 |      |
| chr10 | 55643760 | 55643760 | A | G | exonic   | nonsynonymous SN\ PCDH15   | NM_001142767:c.T929C;p.L310P   | 0           | P134 |      |
| chr11 | 66957052 | 66957052 | G | A | exonic   | nonsynonymous SN\ RPS6KB2  | NM_003952:c.G670A;p.A224T      | 0.84        | P134 |      |
| chr11 | 1.06E+08 | 1.06E+08 | G | A | exonic   | nonsynonymous SN\ GUCY1A2  | NM_000855:c.C1897T;p.R633C     | 0           | P134 |      |
| chr11 | 1.08E+08 | 1.08E+08 | A | G | exonic   | synonymous SNV ATM         | NM_000051:c.A1329G;p.L443L     |             | P134 |      |
| chr11 | 1.08E+08 | 1.08E+08 | T | C | exonic   | nonsynonymous SN\ ATM      | NM_000051:c.T2687C;p.L896P     | 0.07        | P134 |      |
| chr11 | 1.08E+08 | 1.08E+08 | T | C | exonic   | nonsynonymous SN\ ATM      | NM_000051:c.T4007C;p.F1336S    | 0.06        | P134 |      |
| chr12 | 5961364  | 5961364  | C | T | exonic   | nonsynonymous SN\ VWF      | NM_000552:c.G7136A;p.R2379H    | 0.02        | P134 |      |
| chr12 | 22245980 | 22245980 | C | T | exonic   | nonsynonymous SN\ ST8SIA1  | NM_003034:c.G844A;p.A282T      | 0.15        | P134 |      |
| chr12 | 25289548 | 25289548 | C | T | exonic   | nonsynonymous SN\ KRAS     | NM_004985:c.G38A;p.G13D        | rs112445441 | 0    | P134 |
| chr12 | 46813390 | 46813390 | G | A | exonic   | synonymous SNV PFKM        | NM_001166688:c.G453A;p.T151T   |             | P134 |      |
| chr12 | 47455454 | 47455454 | A | G | exonic   | nonsynonymous SN\ ADCY6    | NM_015270:c.T1879C;p.F627L     | 0.18        | P134 |      |
| chr12 | 47463205 | 47463205 | T | C | exonic   | nonsynonymous SN\ ADCY6    | NM_015270:c.A280G;p.T94A       | 0.69        | P134 |      |
| chr12 | 94631219 | 94631219 | T | C | exonic   | nonsynonymous SN\ NTN4     | NM_021229:c.A893G;p.N298S      | 0.02        | P134 |      |
| chr12 | 1.08E+08 | 1.08E+08 | C | T | exonic   | synonymous SNV ACACB       | NM_001093:c.C5071T;p.L1691L    |             | P134 |      |
| chr12 | 1.08E+08 | 1.08E+08 | C | T | exonic   | synonymous SNV ACACB       | NM_001093:c.C5370T;p.V1790V    |             | P134 |      |
| chr12 | 1.08E+08 | 1.08E+08 | G | A | exonic   | nonsynonymous SN\ ACACB    | NM_001093:c.G5632A;p.V1878I    |             | P134 |      |
| chr12 | 1.08E+08 | 1.08E+08 | G | T | splicing | ACACB                      |                                |             | P134 |      |
| chr12 | 1.08E+08 | 1.08E+08 | T | C | exonic   | nonsynonymous SN\ ACACB    | NM_001093:c.T5708C;p.L1903S    | 0           | P134 |      |
| chr12 | 1.29E+08 | 1.29E+08 | C | T | exonic   | nonsynonymous SN\ TMEM132D | NM_133448:c.G172A;p.V58I       | 0.29        | P134 |      |
| chr12 | 1.31E+08 | 1.31E+08 | T | C | exonic   | nonsynonymous SN\ EP400    | NM_015409:c.T3395C;p.L1132P    | 0           | P134 |      |
| chr12 | 1.31E+08 | 1.31E+08 | C | T | exonic   | nonsynonymous SN\ EP400    | NM_015409:c.C9230T;p.S3077L    | 0           | P134 |      |
| chr13 | 30130969 | 30130969 | A | G | exonic   | nonsynonymous SN\ USPL1    | NM_005800:c.A2755G;p.N919D     | 0.55        | P134 |      |
| chr14 | 49654864 | 49654864 | T | C | exonic   | nonsynonymous SN\ SOS2     | NM_006939:c.A3947G;p.H1316R    | 0.78        | P134 |      |
| chr14 | 49710975 | 49710975 | G | A | exonic   | nonsynonymous SN\ SOS2     | NM_006939:c.C1015T;p.R339C     | 0           | P134 |      |
| chr14 | 90408387 | 90408387 | G | A | exonic   | synonymous SNV RPS6KA5     | NM_004755:c.C2193T;p.C731C     |             | P134 |      |
| chr14 | 90514541 | 90514541 | C | G | exonic   | nonsynonymous SN\ RPS6KA5  | NM_004755:c.G256C;p.A86P       | 0.01        | P134 |      |
| chr15 | 26032312 | 26032312 | A | G | splicing | HERC2                      |                                |             | P134 |      |
| chr15 | 26040133 | 26040133 | A | G | exonic   | nonsynonymous SN\ HERC2    | NM_004667:c.T13226C;p.V4409A   | 0.01        | P134 |      |
| chr15 | 26065028 | 26065028 | T | C | exonic   | nonsynonymous SN\ HERC2    | NM_004667:c.A10958G;p.D3653G   | 0           | P134 |      |
| chr15 | 26095206 | 26095206 | A | G | exonic   | nonsynonymous SN\ HERC2    | NM_004667:c.T9649C;p.S3217P    | 0           | P134 |      |
| chr15 | 26134450 | 26134450 | C | T | exonic   | nonsynonymous SN\ HERC2    | NM_004667:c.G6122A;p.G2041D    | 0.33        | P134 |      |
| chr15 | 26179595 | 26179595 | C | T | exonic   | nonsynonymous SN\ HERC2    | NM_004667:c.G2239A;p.V747M     | 0.23        | P134 |      |
| chr15 | 31739846 | 31739846 | C | T | exonic   | nonsynonymous SN\ RYR3     | NM_001036:c.C4552T;p.R1518C    | 0.18        | P134 |      |
| chr16 | 3719641  | 3719641  | T | C | exonic   | nonsynonymous SN\ CREBBP   | NM_001079846:c.A5294G;p.Q1765R | 0.03        | P134 |      |
| chr16 | 60318559 | 60318559 | G | A | exonic   | synonymous SNV CDH8        | NM_001796:c.C1476T;p.N492N     |             | P134 |      |
| chr17 | 7517753  | 7517753  | T | C | exonic   | nonsynonymous SN\ TP53     | NM_001126115:c.A514G;p.T172A   | 0.58        | P134 |      |
| chr17 | 7519132  | 7519132  | G | A | exonic   | nonsynonymous SN\ TP53     | NM_001126115:c.C127T;p.R43C    | 0           | P134 |      |
| chr17 | 10304319 | 10304319 | G | T | exonic   | nonsynonymous SN\ MYH4     | NM_017533:c.C1192A;p.L398M     | 0.33        | P134 |      |
| chr17 | 10307168 | 10307168 | A | G | exonic   | nonsynonymous SN\ MYH4     | NM_017533:c.T868C;p.Y290H      | 0           | P134 |      |
| chr17 | 26586873 | 26586873 | G | A | exonic   | nonsynonymous SN\ NF1      | NM_000267:c.G3827A;p.R1276Q    | 0           | P134 |      |
| chr17 | 38476698 | 38476698 | A | G | exonic   | nonsynonymous SN\ BRCA1    | NM_007297:c.T4618C;p.S1540P    | 0.29        | P134 |      |
| chr17 | 38498869 | 38498869 | T | C | exonic   | synonymous SNV BRCA1       | NM_007297:c.A2064G;p.L688L     |             | P134 |      |
| chr17 | 71245032 | 71245032 | C | T | exonic   | synonymous SNV ITGB4       | NM_001005619:c.C2025T;p.D675D  |             | P134 |      |
| chr17 | 75920415 | 75920415 | C | T | exonic   | nonsynonymous SN\ RNF213   | NM_020914:c.C3679T;p.L1227F    |             | P134 |      |
| chr17 | 75935277 | 75935277 | G | A | exonic   | synonymous SNV RNF213      | NM_020914:c.G8694A;p.A2898A    |             | P134 |      |
| chr17 | 75961410 | 75961410 | G | A | exonic   | synonymous SNV RNF213      | NM_020914:c.G12939A;p.K4313K   |             | P134 |      |
| chr17 | 75964777 | 75964777 | G | A | exonic   | nonsynonymous SN\ RNF213   | NM_020914:c.G13414A;p.V4472M   |             | P134 |      |
| chr18 | 6968274  | 6968274  | C | T | exonic   | synonymous SNV LAMA1       | NM_005559:c.G6111A;p.L2037L    |             | P134 |      |
| chr18 | 6973096  | 6973096  | A | G | splicing | LAMA1                      |                                |             | P134 |      |

|       |          |          |   |   |                 |                   |         |                                |             |      |      |
|-------|----------|----------|---|---|-----------------|-------------------|---------|--------------------------------|-------------|------|------|
| chr18 | 7945129  | 7945129  | T | C | exonic          | synonymous SNV    | PTRPM   | NM_001105244:c.T849C:p.V283V   |             | P134 |      |
| chr18 | 61628176 | 61628176 | G | A | exonic          | nonsynonymous SNV | CDH7    | NM_004361:c.G467A:p.G156D      | 0.39        | P134 |      |
| chr18 | 61699070 | 61699070 | C | T | exonic          | nonsynonymous SNV | CDH7    | NM_004361:c.C2318T:p.A773V     | 0           | P134 |      |
| chr19 | 43685005 | 43685005 | G | A | exonic          | nonsynonymous SNV | RYR1    | NM_000540:c.G7633A:p.E2545K    | 0.07        | P134 |      |
| chr19 | 43690238 | 43690238 | T | C | exonic          | nonsynonymous SNV | RYR1    | NM_000540:c.T8863C:p.F2955L    | 0.02        | P134 |      |
| chr19 | 48112350 | 48112350 | T | C | exonic          | nonsynonymous SNV | PSG6    | NM_001031850:c.A194G:p.Y65C    | 0           | P134 |      |
| chr19 | 61108194 | 61108194 | A | T | exonic          | nonsynonymous SNV | NLRP13  | NM_176810:c.T2544A:p.N848K     | 0           | P134 |      |
| chr19 | 61135480 | 61135480 | A | G | exonic          | nonsynonymous SNV | NLRP13  | NM_176810:c.T10C:p.S4P         | 0           | P134 |      |
| chr20 | 44105200 | 44105200 | G | A | exonic;splicing | synonymous SNV    | SLC12A5 | NM_001134771:c.G1137A:p.E379E  |             | P134 |      |
| chr20 | 44118284 | 44118284 | C | T | exonic          | nonsynonymous SNV | SLC12A5 | NM_001134771:c.C2945T:p.T982M  | 0.11        | P134 |      |
| chr22 | 39886591 | 39886591 | G | T | splicing        |                   | EP300   |                                |             | P134 |      |
| chr22 | 39894406 | 39894406 | A | G | exonic          | synonymous SNV    | EP300   | NM_001429:c.A3882G:p.P1294P    |             | P134 |      |
| chr22 | 39902303 | 39902303 | C | T | exonic          | nonsynonymous SNV | EP300   | NM_001429:c.C4886T:p.A1629V    | 0           | P134 |      |
| chrX  | 18866733 | 18866733 | T | C | exonic          | nonsynonymous SNV | PHKA2   | NM_000292:c.A974G:p.E325G      | 0           | P134 |      |
| chrX  | 19354329 | 19354329 | G | A | exonic          | nonsynonymous SNV | MAP3K15 | NM_001001671:c.C1220T:p.A407V  |             | P134 |      |
| chrX  | 19536085 | 19536085 | C | T | splicing        |                   | SH3KBP1 |                                |             | P134 |      |
| chrX  | 1.54E+08 | 1.54E+08 | A | G | exonic          | synonymous SNV    | F8      | NM_000132:c.T606C:p.S202S      |             | P134 |      |
| chr7  | 1E+08    | 1E+08    | G | C | exonic          | nonsynonymous SNV | MUC17   | NM_001040105:c.G4154C:p.S1385T |             | P130 |      |
| chr17 | 7519200  | 7519200  | G | A | exonic          | nonsynonymous SNV | TP53    | NM_001126115:c.C59T:p.P20L     | 0           | P130 |      |
| chr1  | 1.57E+08 | 1.57E+08 | G | A | exonic          | synonymous SNV    | SPTA1   | NM_003126:c.C3168T:p.R1056R    |             | P133 |      |
| chr6  | 1.47E+08 | 1.47E+08 | G | A | exonic          | nonsynonymous SNV | GRM1    | NM_000838:c.G2735A:p.R912H     | 0           | P133 |      |
| chr6  | 1.53E+08 | 1.53E+08 | C | A | exonic          | stopgain SNV      | SYNE1   | NM_033071:c.G4234T:p.E1412X    | 0.11        | P133 |      |
| chr12 | 25289551 | 25289551 | C | T | exonic          | nonsynonymous SNV | KRAS    | NM_004985:c.G35A:p.G12D        | 0           | P133 |      |
| chr1  | 1.84E+08 | 1.84E+08 | T | C | exonic          | synonymous SNV    | HMCN1   | NM_031935:c.T951C:p.I317I      |             | P132 |      |
| chr3  | 1.42E+08 | 1.42E+08 | G | A | exonic          | nonsynonymous SNV | CLSTN2  | NM_022131:c.G1129A:p.D377N     | 0.31        | P132 |      |
| chr5  | 26942664 | 26942664 | G | A | exonic          | synonymous SNV    | CDH9    | NM_016279:c.C564T:p.D188D      |             | P132 |      |
| chr7  | 93887851 | 93887851 | C | T | exonic          | synonymous SNV    | COL1A2  | NM_000089:c.C2250T:p.N750N     |             | P132 |      |
| chr12 | 22245894 | 22245894 | G | A | exonic          | synonymous SNV    | ST8SIA1 | NM_003034:c.C930T:p.H310H      |             | P132 |      |
| chr18 | 46858767 | 46858767 | C | T | exonic          | nonsynonymous SNV | SMAD4   | NM_005359:c.C1591T:p.R531W     | 0.01        | P132 |      |
| chr19 | 43668611 | 43668611 | G | A | exonic          | nonsynonymous SNV | RYR1    | NM_000540:c.G5476A:p.A1826T    | 0.33        | P132 |      |
| chr5  | 1.12E+08 | 1.12E+08 | C | T | exonic          | stopgain SNV      | APC     | NM_001127511:c.C3286T:p.R1096X | 0           | P126 |      |
| chr15 | 65260776 | 65260776 | C | T | exonic          | nonsynonymous SNV | SMAD3   | NM_001145104:c.C217T:p.R73C    | 0           | P126 |      |
| chr17 | 7518915  | 7518915  | T | C | exonic          | nonsynonymous SNV | TP53    | NM_001126115:c.A263G:p.Y88C    | 0           | P126 |      |
| chrX  | 70515555 | 70515555 | T | A | exonic          | nonsynonymous SNV | TAF1    | NM_004606:c.T1369A:p.W457R     | 0           | P126 |      |
| chr1  | 11113317 | 11113317 | G | A | exonic          | synonymous SNV    | MTOR    | NM_004958:c.C5469T:p.A1823A    | rs17848553  | P129 |      |
| chr1  | 11195055 | 11195055 | C | G | exonic          | synonymous SNV    | MTOR    | NM_004958:c.G3462C:p.R1154R    | rs17036536  | P129 |      |
| chr1  | 1.58E+08 | 1.58E+08 | C | T | exonic          | synonymous SNV    | ATP1A4  | NM_144699:c.C1038T:p.A346A     | rs11265338  | P129 |      |
| chr1  | 2.14E+08 | 2.14E+08 | C | T | exonic          | synonymous SNV    | USH2A   | NM_206933:c.G9975A:p.G3325G    |             | P129 |      |
| chr1  | 2.47E+08 | 2.47E+08 | C | T | exonic          | synonymous SNV    | OR2M7   | NM_001004691:c.G855A:p.L285L   | rs4451579   | P129 |      |
| chr2  | 15459803 | 15459803 | C | T | exonic          | nonsynonymous SNV | NBAS    | NM_015909:c.G3011A:p.R1004Q    | rs16862653  | 0.09 | P129 |
| chr2  | 39148291 | 39148291 | T | G | exonic          | synonymous SNV    | SOS1    | NM_005633:c.A195C:p.R65R       | rs7609455   | P129 |      |
| chr2  | 1.16E+08 | 1.16E+08 | G | T | exonic          | nonsynonymous SNV | DPP10   | NM_001004360:c.G2155T:p.A719S  | 0           | P129 |      |
| chr2  | 1.7E+08  | 1.7E+08  | G | A | exonic          | synonymous SNV    | LRP2    | NM_004525:c.C13359T:p.S4453S   |             | P129 |      |
| chr2  | 1.7E+08  | 1.7E+08  | C | T | exonic          | synonymous SNV    | LRP2    | NM_004525:c.G10503A:p.Q3501Q   | rs2229265   | P129 |      |
| chr2  | 1.7E+08  | 1.7E+08  | A | G | exonic          | synonymous SNV    | LRP2    | NM_004525:c.T4875C:p.C1625C    | rs2229267   | P129 |      |
| chr2  | 2.02E+08 | 2.02E+08 | A | G | exonic          | nonsynonymous SNV | CASP8   | NM_001080125:c.A41G:p.K14R     | rs3769823   | 0    | P129 |
| chr2  | 2.02E+08 | 2.02E+08 | G | A | exonic          | synonymous SNV    | CASP8   | NM_033356:c.G915A:p.K305K      | rs1045487   | P129 |      |
| chr2  | 2.38E+08 | 2.38E+08 | C | T | exonic          | synonymous SNV    | COL6A3  | NM_057166:c.G6276A:p.V2092V    | rs115757876 | P129 |      |
| chr2  | 2.38E+08 | 2.38E+08 | C | T | exonic          | synonymous SNV    | COL6A3  | NM_057166:c.G4548A:p.L1516L    | rs2646254   | P129 |      |
| chr3  | 10356982 | 10356982 | G | T | exonic          | nonsynonymous SNV | ATP2B2  | NM_001683:c.C3046A:p.L1016M    |             | 0.17 | P129 |
| chr3  | 10388526 | 10388526 | G | A | exonic          | synonymous SNV    | ATP2B2  | NM_001683:c.C1491T:p.I497I     | rs2289272   | P129 |      |
| chr3  | 58058590 | 58058590 | C | A | exonic          | synonymous SNV    | FLNB    | NM_001164317:c.C993A:p.V331V   |             | P129 |      |
| chr3  | 1.25E+08 | 1.25E+08 | T | C | exonic          | nonsynonymous SNV | MYLK    | NM_053025:c.A1213G:p.M405V     | rs35436690  | 0.27 | P129 |

|      |          |          |   |   |        |                   |         |                               |            |           |
|------|----------|----------|---|---|--------|-------------------|---------|-------------------------------|------------|-----------|
| chr4 | 25026207 | 25026207 | T | A | exonic | synonymous SNV    | ANAPC4  | NM_013367:c.T1848A:p.I616I    | rs3214035  | P129      |
| chr4 | 54824835 | 54824835 | T | C | exonic | synonymous SNV    | PDGFRA  | NM_006206:c.T612C:p.N204N     | rs2229307  | P129      |
| chr4 | 54828483 | 54828483 | T | G | exonic | synonymous SNV    | PDGFRA  | NM_006206:c.T939G:p.G313G     | rs4358459  | P129      |
| chr4 | 54834528 | 54834528 | T | C | exonic | nonsynonymous SNV | PDGFRA  | NM_006206:c.T1432C:p.S478P    | rs35597368 | 0.31 P129 |
| chr4 | 54838334 | 54838334 | G | A | exonic | synonymous SNV    | PDGFRA  | NM_006206:c.G1809A:p.A603A    | rs10028020 | P129      |
| chr4 | 54846797 | 54846797 | C | T | exonic | synonymous SNV    | PDGFRA  | NM_006206:c.C2472T:p.V824V    | rs2228230  | P129      |
| chr4 | 75467298 | 75467298 | A | G | exonic | synonymous SNV    | EREG    | NM_001432:c.A351G:p.E117E     | rs2367707  | P129      |
| chr4 | 1.27E+08 | 1.27E+08 | G | A | exonic | nonsynonymous SNV | FAT4    | NM_024582:c.G8476A:p.D2826N   | rs12508222 | 1 P129    |
| chr4 | 1.55E+08 | 1.55E+08 | G | A | exonic | nonsynonymous SNV | DCHS2   | NM_017639:c.C8027T:p.P2676L   | rs61746132 | 0.02 P129 |
| chr4 | 1.55E+08 | 1.55E+08 | G | A | exonic | nonsynonymous SNV | DCHS2   | NM_017639:c.C3614T:p.S1205L   | rs11935573 | 0.01 P129 |
| chr4 | 1.55E+08 | 1.55E+08 | A | G | exonic | synonymous SNV    | DCHS2   | NM_001142552:c.T2556C:p.G852C | rs6858157  | P129      |
| chr4 | 1.56E+08 | 1.56E+08 | G | A | exonic | synonymous SNV    | DCHS2   | NM_017639:c.C39T:p.D13D       | rs62331900 | P129      |
| chr5 | 7819894  | 7819894  | G | A | exonic | nonsynonymous SNV | ADCY2   | NM_020546:c.G2189A:p.R730H    |            | P129      |
| chr5 | 82821950 | 82821950 | T | C | exonic | synonymous SNV    | VCAN    | NM_001126336:c.T348C:p.T116T  | rs12332199 | P129      |
| chr5 | 82821995 | 82821995 | C | T | exonic | synonymous SNV    | VCAN    | NM_001126336:c.C393T:p.D131D  | rs35042106 | P129      |
| chr5 | 1.4E+08  | 1.4E+08  | G | A | exonic | nonsynonymous SNV | PCDHA10 | NM_018901:c.G2012A:p.G671D    | rs17844348 | P129      |
| chr5 | 1.4E+08  | 1.4E+08  | G | A | exonic | nonsynonymous SNV | PCDHB2  | NM_018936:c.G382A:p.V128I     | rs31853    | 1 P129    |
| chr5 | 1.4E+08  | 1.4E+08  | A | G | exonic | nonsynonymous SNV | PCDHB3  | NM_018937:c.A122G:p.K41R      | rs31849    | 0.83 P129 |
| chr5 | 1.4E+08  | 1.4E+08  | A | G | exonic | synonymous SNV    | PCDHB3  | NM_018937:c.A345G:p.Q115Q     | rs17844387 | P129      |
| chr5 | 1.4E+08  | 1.4E+08  | G | A | exonic | nonsynonymous SNV | PCDHB4  | NM_018938:c.G1261A:p.A421T    | rs3776099  | 1 P129    |
| chr5 | 1.4E+08  | 1.4E+08  | C | T | exonic | nonsynonymous SNV | PCDHB4  | NM_018938:c.C1951T:p.R651C    | rs17844417 | 0 P129    |
| chr5 | 1.41E+08 | 1.41E+08 | G | C | exonic | nonsynonymous SNV | PCDHB7  | NM_018940:c.G1165C:p.V389L    | rs2910313  | 1 P129    |
| chr5 | 1.41E+08 | 1.41E+08 | C | G | exonic | synonymous SNV    | PCDHB7  | NM_018940:c.C1590G:p.R530R    | rs2907329  | P129      |
| chr5 | 1.41E+08 | 1.41E+08 | A | T | exonic | nonsynonymous SNV | PCDHB7  | NM_018940:c.A2146T:p.R716W    | rs2910314  | 0 P129    |
| chr5 | 1.41E+08 | 1.41E+08 | T | C | exonic | synonymous SNV    | PCDHB7  | NM_018940:c.T2190C:p.F730F    | rs11741863 | P129      |
| chr5 | 1.41E+08 | 1.41E+08 | G | C | exonic | nonsynonymous SNV | PCDHB8  | NM_019120:c.G730C:p.E244Q     | rs2950844  | 0.58 P129 |
| chr5 | 1.41E+08 | 1.41E+08 | G | A | exonic | nonsynonymous SNV | PCDHB16 | NM_020957:c.G2204A:p.R735H    |            | 1 P129    |
| chr5 | 1.41E+08 | 1.41E+08 | T | A | exonic | synonymous SNV    | PCDHB11 | NM_018931:c.T1146A:p.V382V    | rs3733688  | P129      |
| chr5 | 1.41E+08 | 1.41E+08 | G | T | exonic | synonymous SNV    | PCDHB11 | NM_018931:c.G2163T:p.S721S    | rs638054   | P129      |
| chr5 | 1.41E+08 | 1.41E+08 | C | T | exonic | nonsynonymous SNV | PCDHB12 | NM_018932:c.C1259T:p.T420I    | rs2910327  | 0 P129    |
| chr5 | 1.41E+08 | 1.41E+08 | A | G | exonic | nonsynonymous SNV | PCDHB12 | NM_018932:c.A2287G:p.K763E    | rs2910006  | 1 P129    |
| chr5 | 1.51E+08 | 1.51E+08 | C | T | exonic | synonymous SNV    | FAT2    | NM_001447:c.G10437A:p.P3479P  | rs3734051  | P129      |
| chr5 | 1.51E+08 | 1.51E+08 | G | A | exonic | nonsynonymous SNV | FAT2    | NM_001447:c.C9952T:p.R3318W   | rs2304024  | 0.09 P129 |
| chr5 | 1.51E+08 | 1.51E+08 | A | G | exonic | nonsynonymous SNV | FAT2    | NM_001447:c.T6476C:p.V2159A   |            | 0.05 P129 |
| chr5 | 1.69E+08 | 1.69E+08 | G | A | exonic | nonsynonymous SNV | DOCK2   | NM_004946:c.G401A:p.G134E     |            | 0.1 P129  |
| chr5 | 1.69E+08 | 1.69E+08 | G | A | exonic | synonymous SNV    | DOCK2   | NM_004946:c.G2727A:p.Q909Q    | rs261623   | P129      |
| chr5 | 1.69E+08 | 1.69E+08 | C | G | exonic | synonymous SNV    | DOCK2   | NM_004946:c.C3456G:p.L1152L   | rs9791113  | P129      |
| chr6 | 90699079 | 90699079 | G | A | exonic | synonymous SNV    | BACH2   | NM_001170794:c.C2295T:p.N765N | rs3798789  | P129      |
| chr6 | 90717040 | 90717040 | T | C | exonic | synonymous SNV    | BACH2   | NM_001170794:c.A1506G:p.V502V | rs9451298  | P129      |
| chr6 | 1.3E+08  | 1.3E+08  | G | A | exonic | synonymous SNV    | LAMA2   | NM_000426:c.G6237A:p.T2079T   | rs2297738  | P129      |
| chr6 | 1.47E+08 | 1.47E+08 | G | A | exonic | synonymous SNV    | GRM1    | NM_000838:c.G2793A:p.K931K    | rs2942     | P129      |
| chr6 | 1.47E+08 | 1.47E+08 | T | C | exonic | nonsynonymous SNV | GRM1    | NM_000838:c.T2977C:p.S993P    | rs6923492  | 0.3 P129  |
| chr6 | 1.47E+08 | 1.47E+08 | C | A | exonic | synonymous SNV    | GRM1    | NM_000838:c.C3495A:p.P1165P   | rs9373491  | P129      |
| chr6 | 1.53E+08 | 1.53E+08 | G | A | exonic | nonsynonymous SNV | SYNE1   | NM_033071:c.C16064T:p.T5355M  | rs2306914  | 0.08 P129 |
| chr6 | 1.53E+08 | 1.53E+08 | A | T | exonic | nonsynonymous SNV | SYNE1   | NM_033071:c.T14830A:p.L4944M  | rs2306916  | 0.08 P129 |
| chr6 | 1.53E+08 | 1.53E+08 | C | G | exonic | synonymous SNV    | SYNE1   | NM_033071:c.G13848C:p.L4616L  | rs3734365  | P129      |
| chr6 | 1.53E+08 | 1.53E+08 | A | T | exonic | nonsynonymous SNV | SYNE1   | NM_033071:c.T13573A:p.S4525T  | rs6911096  | 0.39 P129 |
| chr6 | 1.53E+08 | 1.53E+08 | T | C | exonic | nonsynonymous SNV | SYNE1   | NM_033071:c.A12149G:p.K4050R  | rs9479297  | 1 P129    |
| chr6 | 1.53E+08 | 1.53E+08 | C | A | exonic | nonsynonymous SNV | SYNE1   | NM_033071:c.G11967T:p.E3989D  | rs4645434  | 0.31 P129 |
| chr6 | 1.53E+08 | 1.53E+08 | A | G | exonic | synonymous SNV    | SYNE1   | NM_182961:c.T10866C:p.S3622S  | rs9397102  | P129      |
| chr6 | 1.53E+08 | 1.53E+08 | G | T | exonic | synonymous SNV    | SYNE1   | NM_033071:c.C10212A:p.G3404G  | rs4407724  | P129      |
| chr6 | 1.53E+08 | 1.53E+08 | T | C | exonic | synonymous SNV    | SYNE1   | NM_033071:c.A9516G:p.E3172E   | rs6913579  | P129      |
| chr6 | 1.69E+08 | 1.69E+08 | G | A | exonic | synonymous SNV    | THBS2   | NM_003247:c.C3075T:p.A1025A   | rs9505895  | P129      |

|       |          |          |   |   |                 |                   |          |                               |            |           |
|-------|----------|----------|---|---|-----------------|-------------------|----------|-------------------------------|------------|-----------|
| chr7  | 1E+08    | 1E+08    | G | C | exonic          | nonsynonymous SNV | MUC17    | NM_001040105:c.G11794C:p.G39C | rs74974199 | P129      |
| chr9  | 21294803 | 21294803 | G | A | exonic          | synonymous SNV    | IFNA5    | NM_002169:c.C453T:p.T151T     | rs10757212 | P129      |
| chr9  | 1.23E+08 | 1.23E+08 | G | A | exonic          | synonymous SNV    | TRAF1    | NM_001190947:c.C144T:p.S48S   | rs3747841  | P129      |
| chr9  | 1.37E+08 | 1.37E+08 | G | A | exonic;splicing | synonymous SNV    | COL5A1   | NM_000093:c.G4122A:p.T1374T   | rs3827848  | P129      |
| chr10 | 35969137 | 35969137 | G | A | exonic          | synonymous SNV    | FZD8     | NM_031866:c.C1227T:p.A409A    | rs74989785 | P129      |
| chr10 | 55425497 | 55425497 | C | T | exonic          | nonsynonymous SNV | PCDH15   | NM_001142765:c.G2573A:p.R858C | rs2135720  | 0.42 P129 |
| chr10 | 56093974 | 56093974 | A | C | exonic          | nonsynonymous SNV | PCDH15   | NM_001142763:c.T55G:p.S19A    | rs11004439 | 0.04 P129 |
| chr10 | 1.16E+08 | 1.16E+08 | A | G | exonic          | synonymous SNV    | C10orf81 | NM_182601:c.A18G:p.Q6Q        | rs10885500 | P129      |
| chr10 | 1.27E+08 | 1.27E+08 | T | C | exonic          | synonymous SNV    | CTBP2    | NM_022802:c.A1254G:p.A418A    | rs3781413  | P129      |
| chr10 | 1.27E+08 | 1.27E+08 | C | T | exonic          | nonsynonymous SNV | CTBP2    | NM_022802:c.G893A:p.R298Q     | rs3781411  | 0 P129    |
| chr10 | 1.27E+08 | 1.27E+08 | C | T | exonic          | nonsynonymous SNV | CTBP2    | NM_022802:c.G700A:p.V234M     | rs3781409  | 0 P129    |
| chr10 | 1.27E+08 | 1.27E+08 | G | A | exonic          | synonymous SNV    | CTBP2    | NM_022802:c.C585T:p.D195D     | rs3781407  | P129      |
| chr10 | 1.29E+08 | 1.29E+08 | T | C | exonic          | synonymous SNV    | DOCK1    | NM_001380:c.T4482C:p.I1494I   | rs2229600  | P129      |
| chr10 | 1.34E+08 | 1.34E+08 | A | G | exonic          | synonymous SNV    | LRRRC27  | NM_001143757:c.A699G:p.P233P  | rs2474328  | P129      |
| chr11 | 750139   | 750139   | A | T | exonic          | nonsynonymous SNV | TALDO1   | NM_006755:c.A347T:p.D116V     |            | 0.09 P129 |
| chr11 | 1.24E+08 | 1.24E+08 | A | G | exonic          | synonymous SNV    | OR8B8    | NM_012378:c.T360C:p.Y120Y     | rs4296049  | P129      |
| chr12 | 6042463  | 6042463  | T | C | exonic          | nonsynonymous SNV | VWF      | NM_000552:c.A1451G:p.H484R    | rs1800378  | 1 P129    |
| chr12 | 46654243 | 46654243 | C | T | exonic          | nonsynonymous SNV | COL2A1   | NM_033150:c.G4006A:p.G1336S   | rs2070739  | 0.01 P129 |
| chr12 | 1.08E+08 | 1.08E+08 | C | T | exonic          | synonymous SNV    | ACACB    | NM_001093:c.C816T:p.A272A     | rs4766516  | P129      |
| chr12 | 1.08E+08 | 1.08E+08 | G | A | exonic          | nonsynonymous SNV | ACACB    | NM_001093:c.G1951A:p.A651T    | rs2300455  | 0.01 P129 |
| chr12 | 1.27E+08 | 1.27E+08 | A | G | exonic          | nonsynonymous SNV | TMEM132C | NM_001136103:c.A482G:p.H161R  | rs11059681 | P129      |
| chr12 | 1.28E+08 | 1.28E+08 | G | A | exonic          | nonsynonymous SNV | TMEM132D | NM_133448:c.C2327T:p.S776F    |            | 0.09 P129 |
| chr12 | 1.28E+08 | 1.28E+08 | C | T | exonic          | nonsynonymous SNV | TMEM132D | NM_133448:c.G2299A:p.V767I    | rs73159540 | 0.37 P129 |
| chr13 | 30131063 | 30131063 | G | A | exonic          | nonsynonymous SNV | USPL1    | NM_005800:c.G2849A:p.S950N    | rs3742302  | 1 P129    |
| chr15 | 26086467 | 26086467 | G | A | exonic          | synonymous SNV    | HERC2    | NM_004667:c.C10515T:p.A3505A  | rs61756152 | P129      |
| chr16 | 54077108 | 54077108 | C | T | exonic          | synonymous SNV    | MMP2     | NM_001127891:c.C600T:p.T200T  | rs1053605  | P129      |
| chr17 | 1509478  | 1509478  | G | A | exonic          | synonymous SNV    | PRPF8    | NM_006445:c.C5061T:p.Y1687Y   |            | P129      |
| chr17 | 7517813  | 7517813  | T | G | exonic          | nonsynonymous SNV | TP53     | NM_001126115:c.A454C:p.T152P  |            | 0 P129    |
| chr17 | 10495647 | 10495647 | C | T | exonic          | nonsynonymous SNV | MYH3     | NM_002470:c.G412A:p.E138K     |            | 0.36 P129 |
| chr17 | 26532901 | 26532901 | G | A | exonic          | synonymous SNV    | NF1      | NM_000267:c.G702A:p.L234L     | rs1801052  | P129      |
| chr17 | 75956371 | 75956371 | G | A | exonic          | synonymous SNV    | RNF213   | NM_020914:c.G12135A:p.P4045P  | rs77506504 | P129      |
| chr18 | 6973194  | 6973194  | G | T | exonic          | synonymous SNV    | LAMA1    | NM_005559:c.C5700A:p.T1900T   | rs11661974 | P129      |
| chr18 | 6975270  | 6975270  | C | T | exonic          | nonsynonymous SNV | LAMA1    | NM_005559:c.G5626A:p.A1876T   | rs11664063 | 0.57 P129 |
| chr18 | 7007322  | 7007322  | A | G | exonic          | synonymous SNV    | LAMA1    | NM_005559:c.T2763C:p.C921C    | rs539713   | P129      |
| chr19 | 43651520 | 43651520 | C | T | exonic          | synonymous SNV    | RYR1     | NM_000540:c.C3456T:p.I1152I   | rs11083462 | P129      |
| chr19 | 43682454 | 43682454 | C | T | exonic          | synonymous SNV    | RYR1     | NM_000540:c.C7281T:p.A2427A   | rs77310009 | P129      |
| chr19 | 43683440 | 43683440 | C | T | exonic          | synonymous SNV    | RYR1     | NM_000540:c.C7584T:p.P2528P   | rs1465698  | P129      |
| chr19 | 43701893 | 43701893 | C | T | exonic          | synonymous SNV    | RYR1     | NM_000540:c.C10218T:p.Y3406Y  | rs41274330 | P129      |
| chr19 | 47959907 | 47959907 | C | T | splicing        |                   | PSG8     |                               |            | P129      |
| chr19 | 48267714 | 48267714 | T | C | exonic          | synonymous SNV    | PSG2     | NM_031246:c.A942G:p.T314T     | rs3746096  | P129      |
| chr19 | 48271482 | 48271482 | A | G | exonic          | synonymous SNV    | PSG2     | NM_031246:c.T573C:p.H191H     | rs77796305 | P129      |
| chr19 | 60040843 | 60040843 | G | A | exonic;splicing | nonsynonymous SNV | KIR2DS4  | NM_012314:c.G71A:p.G24E       | rs58731871 | 0 P129    |
| chr19 | 60041085 | 60041085 | C | A | exonic          | nonsynonymous SNV | KIR2DS4  | NM_012314:c.C313A:p.P105T     | rs1130492  | 0.76 P129 |
| chr19 | 60069895 | 60069895 | T | C | exonic          | nonsynonymous SNV | KIR3DL2  | NM_006737:c.T1265C:p.L422P    | rs58413124 | 1 P129    |
| chr19 | 61102034 | 61102034 | C | T | exonic          | synonymous SNV    | NLRP13   | NM_176810:c.G2871A:p.L957L    | rs302827   | P129      |
| chr20 | 23369101 | 23369101 | G | A | exonic          | nonsynonymous SNV | CSTL1    | NM_138283:c.G197A:p.R66K      | rs17757442 | 0.58 P129 |
| chr20 | 23372638 | 23372638 | C | T | exonic          | nonsynonymous SNV | CSTL1    | NM_138283:c.C287T:p.T96M      | rs3746737  | 0.01 P129 |
| chr20 | 52219626 | 52219626 | G | A | exonic          | synonymous SNV    | CYP24A1  | NM_000782:c.C552T:p.A184A     | rs2296241  | P129      |
| chr21 | 45724838 | 45724838 | C | T | exonic          | synonymous SNV    | COL18A1  | NM_030582:c.C1968T:p.F656F    | rs2236467  | P129      |
| chr21 | 45737905 | 45737905 | G | C | exonic          | nonsynonymous SNV | COL18A1  | NM_030582:c.G2880C:p.Q960H    | rs2230693  | P129      |
| chr21 | 45751917 | 45751917 | A | G | exonic          | synonymous SNV    | COL18A1  | NM_030582:c.A3762G:p.T1254T   | rs12483761 | P129      |
| chr21 | 45755537 | 45755537 | G | A | exonic          | nonsynonymous SNV | COL18A1  | NM_030582:c.G4309A:p.D1437N   | rs12483377 | P129      |
| chr22 | 39877954 | 39877954 | A | G | exonic          | nonsynonymous SNV | EP300    | NM_001429:c.A2989G:p.I997V    | rs20551    | 0.29 P129 |

|       |          |          |   |   |                 |                   |       |                               |           |      |      |
|-------|----------|----------|---|---|-----------------|-------------------|-------|-------------------------------|-----------|------|------|
| chr22 | 39880985 | 39880985 | T | A | exonic          | synonymous SNV    | EP300 | NM_001429:c.T3183A;p.T1061T   | rs20552   |      | P129 |
| chrX  | 32290917 | 32290917 | C | T | exonic          | nonsynonymous SNV | DMD   | NM_004011:c.G1211A;p.R404H    | rs1801187 | 0.01 | P129 |
| chrX  | 32293207 | 32293207 | C | T | exonic          | nonsynonymous SNV | DMD   | NM_004011:c.G853A;p.V285M     |           | 0.14 | P129 |
| chrX  | 1.54E+08 | 1.54E+08 | C | T | exonic          | nonsynonymous SNV | F8    | NM_000132:c.G5000A;p.R1667Q   |           | 0.01 | P129 |
| chr18 | 7039077  | 7039077  | G | A | exonic;splicing | synonymous SNV    | LAMA1 | NM_005559:c.C768T;p.R256R     |           |      | P128 |
| chr2  | 1.7E+08  | 1.7E+08  | G | C | exonic          | synonymous SNV    | LRP2  | NM_004525:c.C13062G;p.P4354P  |           |      | P115 |
| chr2  | 2.12E+08 | 2.12E+08 | G | A | exonic          | nonsynonymous SNV | ERBB4 | NM_001042599:c.C2275T;p.P759S |           | 0.02 | P115 |
