# Supplementary material for: Novel recurrently mutated genes and a prognostic mutation signature in colorectal cancer
Source: HighWire-hosted journal article supplement (doi:10.1136/gutjnl-2013-306620), 2014-06-20
Supplement: gutjnl-2013-306620supp_tableS9.pdf [file gutjnl-2013-306620supp_tableS9.pdf]

**Table S9.** A complete list of somatic small indels identified in 160 colorectal cancer patients by targeted capture sequencing.

| Chror | Start   | End     | Ref          | Obs     | Func     | ExonicFunc             | Gene    | Amino acid change                           | mutated | sample |
|-------|---------|---------|--------------|---------|----------|------------------------|---------|---------------------------------------------|---------|--------|
| chr5  | 1.1E+08 | 1.1E+08 | AC           | -       | exonic   | frameshift deletion    | APC     | NM_001127511:c.3522_3523del:p.1174_1175del  | P47     |        |
| chr5  | 1.1E+08 | 1.1E+08 | C            | -       | exonic   | stopgain SNV           | APC     | NM_001127511:c.3977delC:p.S1326X            | P48     |        |
| chr17 | 7518938 | 7518939 | AA           | -       | exonic   | frameshift deletion    | TP53    | NM_001126115:c.239_240del:p.80_80del        | P49     |        |
| chr17 | 7.6E+07 | 7.6E+07 | -            | CTTCGTC | exonic   | frameshift insertion   | RNF213  | NM_020914:c.10382_10383insCTTCGTC:p.I3461fs | P50     |        |
| chr17 | 7518283 | 7518283 | G            | -       | exonic   | frameshift deletion    | TP53    | NM_001126115:c.327delC:p.S109fs             | P137    |        |
| chr5  | 1.1E+08 | 1.1E+08 | G            | -       | exonic   | frameshift deletion    | APC     | NM_001127511:c.1329delG:p.E443fs            | P45     |        |
| chr6  | 1.7E+08 | 1.7E+08 | -            | A       | splicing |                        | PDE10A  |                                             | P44     |        |
| chr8  | 5.3E+07 | 5.3E+07 | -            | A       | exonic   | frameshift insertion   | PCMTD1  | NM_052937:c.571_572insT:p.I191fs            | P41     |        |
| chr17 | 2.7E+07 | 2.7E+07 | T            | -       | exonic   | frameshift deletion    | NF1     | NM_000267:c.821delT:p.L274fs                | P41     |        |
| chr5  | 1.1E+08 | 1.1E+08 | CACAG        | -       | exonic   | frameshift deletion    | APC     | NM_001127511:c.3926_3930del:p.1309_1310del  | P40     |        |
| chr18 | 4.7E+07 | 4.7E+07 | -            | T       | exonic   | frameshift insertion   | SMAD4   | NM_005359:c.1478_1479insT:p.D493fs          | P40     |        |
| chr2  | 1.7E+08 | 1.7E+08 | -            | G       | exonic   | frameshift insertion   | LRP2    | NM_004525:c.13140_13141insC:p.P4380fs       | P43     |        |
| chr5  | 1.1E+08 | 1.1E+08 | T            | -       | exonic   | frameshift deletion    | APC     | NM_001127511:c.4254delT:p.S1418fs           | P43     |        |
| chr5  | 1.1E+08 | 1.1E+08 | AC           | -       | exonic   | frameshift deletion    | APC     | NM_001127511:c.2431_2432del:p.811_811del    | P37     |        |
| chr13 | 6.7E+07 | 6.7E+07 | T            | -       | exonic   | frameshift deletion    | PCDH9   | NM_020403:c.1734delA:p.Q578fs               | P38     |        |
| chr1  | 1.6E+08 | 1.6E+08 | -            | T       | exonic   | frameshift insertion   | SPTA1   | NM_003126:c.6183_6184insA:p.K2061fs         | P110    |        |
| chr1  | 1.6E+08 | 1.6E+08 | A            | -       | splicing |                        | ATP1A2  |                                             | P110    |        |
| chr1  | 1.8E+08 | 1.8E+08 | A            | -       | exonic   | frameshift deletion    | HMCN1   | NM_031935:c.994delA:p.K332fs                | P110    |        |
| chr2  | 1.9E+08 | 1.9E+08 | -            | C       | exonic   | frameshift insertion   | COL3A1  | NM_000090:c.407_408insC:p.G136fs            | P110    |        |
| chr3  | 1.4E+08 | 1.4E+08 | -            | A       | exonic   | frameshift insertion   | ATR     | NM_001184:c.810_811insT:p.F270fs            | P110    |        |
| chr5  | 2.5E+07 | 2.5E+07 | A            | -       | exonic   | frameshift deletion    | CDH10   | NM_006727:c.1577delT:p.F526fs               | P110    |        |
| chr5  | 1.1E+08 | 1.1E+08 | -            | A       | exonic   | frameshift insertion   | APC     | NM_001127511:c.6518_6519insA:p.G2173fs      | P110    |        |
| chr5  | 1.4E+08 | 1.4E+08 | A            | -       | exonic   | frameshift deletion    | PCDHB1  | NM_013340:c.1482delA:p.P494fs               | P110    |        |
| chr7  | 9.2E+07 | 9.2E+07 | AG           | -       | exonic   | frameshift deletion    | AKAP9   | NM_005751:c.4950_4951del:p.1650_1651del     | P110    |        |
| chr10 | 9.7E+07 | 9.7E+07 | A            | -       | exonic   | frameshift deletion    | SORBS1  | NM_001034954:c.1314delT:p.T438fs            | P110    |        |
| chr2  | 1.7E+08 | 1.7E+08 | G            | -       | exonic   | frameshift deletion    | LRP2    | NM_004525:c.13139delC:p.P4380fs             | P151    |        |
| chr5  | 2.5E+07 | 2.5E+07 | -            | A       | exonic   | frameshift insertion   | CDH10   | NM_006727:c.1578_1579insT:p.F526fs          | P151    |        |
| chr5  | 8.3E+07 | 8.3E+07 | T            | -       | exonic   | frameshift deletion    | VCAN    | NM_001164097:c.6217delT:p.F2073fs           | P151    |        |
| chr6  | 1.3E+08 | 1.3E+08 | G            | -       | exonic   | frameshift deletion    | LAMA2   | NM_000426:c.5285delG:p.R1762fs              | P151    |        |
| chr7  | 8.1E+07 | 8.1E+07 | -            | T       | exonic   | frameshift insertion   | HGF     | NM_000601:c.182_183insA:p.T61fs             | P151    |        |
| chr7  | 9.1E+07 | 9.1E+07 | A            | -       | exonic   | frameshift deletion    | AKAP9   | NM_005751:c.940delA:p.K314fs                | P151    |        |
| chr7  | 1.5E+08 | 1.5E+08 | T            | -       | exonic   | frameshift deletion    | MLL3    | NM_170606:c.8390delA:p.K2797fs              | P151    |        |
| chr7  | 1.5E+08 | 1.5E+08 | CTG          | -       | exonic   | nonframeshift deletion | PAXIP1  | NM_007349:c.1642_1644del:p.548_548del       | P151    |        |
| chr18 | 7028885 | 7028885 | T            | -       | exonic   | frameshift deletion    | LAMA1   | NM_005559:c.1487delA:p.N496fs               | P151    |        |
| chr18 | 4.9E+07 | 4.9E+07 | -            | C       | exonic   | frameshift insertion   | DCC     | NM_005215:c.3251_3252insC:p.H1084fs         | P151    |        |
| chr19 | 7882148 | 7882148 | -            | C       | exonic   | frameshift insertion   | MAP2K7  | NM_145185:c.869_870insC:p.D290fs            | P151    |        |
| chrX  | 2E+07   | 2E+07   | CT           | -       | exonic   | frameshift deletion    | SH3KBP1 | NM_001184960:c.440_441del:p.147_147del      | P151    |        |
| chrX  | 1.5E+08 | 1.5E+08 | -            | T       | exonic   | frameshift insertion   | F8      | NM_000132:c.3301_3302insA:p.E1101fs         | P151    |        |
| chr17 | 4.3E+07 | 4.3E+07 | TTATCTTACCTT | -       | exonic   | nonframeshift deletion | CDC27   | NM_001114091:c.2173_2178del:p.725_726del    | P149    |        |
| chr5  | 1.1E+08 | 1.1E+08 | -            | A       | exonic   | frameshift insertion   | APC     | NM_001127511:c.4606_4607insA:p.E1536fs      | P141    |        |
| chr5  | 1.1E+08 | 1.1E+08 | AG           | -       | exonic   | frameshift deletion    | APC     | NM_001127511:c.4163_4164del:p.1388_1388del  | P36     |        |
| chr5  | 1.1E+08 | 1.1E+08 | -            | A       | exonic   | frameshift insertion   | APC     | NM_001127511:c.3866_3867insA:p.I1289fs      | P29     |        |
| chr6  | 1.5E+08 | 1.5E+08 | A            | -       | exonic   | frameshift deletion    | SYNE1   | NM_033071:c.7107delT:p.N2369fs              | P30     |        |
| chr5  | 1.1E+08 | 1.1E+08 | TG           | -       | exonic   | frameshift deletion    | APC     | NM_001127511:c.1293_1294del:p.431_432del    | P31     |        |
| chr20 | 5.8E+07 | 5.8E+07 | A            | -       | exonic   | nonframeshift deletion | CDH26   | NM_021810:c.497delA:p.X166X                 | P140    |        |
| chrX  | 1.5E+08 | 1.5E+08 | T            | -       | exonic   | frameshift deletion    | F8      | NM_000132:c.3637delA:p.I1213fs              | P140    |        |
| chr5  | 1.1E+08 | 1.1E+08 | CAGA         | -       | exonic   | frameshift deletion    | APC     | NM_001127511:c.1819_1822del:p.607_608del    | P34     |        |
| chr5  | 1.1E+08 | 1.1E+08 | C            | -       | exonic   | frameshift deletion    | APC     | NM_001127511:c.3901delC:p.P1301fs           | P46     |        |

|       |         |         |            |     |                 |                        |          |                                             |      |
|-------|---------|---------|------------|-----|-----------------|------------------------|----------|---------------------------------------------|------|
| chr7  | 9.1E+07 | 9.1E+07 | -          | AAC | exonic          | nonframeshift insert   | AKAP9    | NM_005751:c.4003_4004insAAC;p.K1335delinsKQ | P46  |
| chr11 | 1.1E+08 | 1.1E+08 | -          | A   | exonic          | frameshift insertion   | ATM      | NM_000051:c.5971_5972insA;p.E1991fs         | P2   |
| chrX  | 1.5E+08 | 1.5E+08 | T          | -   | exonic          | frameshift deletion    | F8       | NM_000132:c.3637delA;p.I1213fs              | P2   |
| chr14 | 3.2E+07 | 3.2E+07 | G          | -   | exonic          | frameshift deletion    | ARHGAP5  | NM_001030055:c.3443delG;p.R1148fs           | P143 |
| chr5  | 1.1E+08 | 1.1E+08 | -          | T   | exonic          | frameshift insertion   | APC      | NM_001127511:c.4005_4006insT;p.E1335fs      | P144 |
| chr17 | 7517795 | 7517795 | G          | -   | exonic          | frameshift deletion    | TP53     | NM_001126115:c.472delC;p.R158fs             | P144 |
| chr22 | 1.9E+07 | 1.9E+07 | -          | CAG | exonic          | nonframeshift insert   | MED15    | NM_001003891:c.531_532insCAG;p.L177delinsLQ | P157 |
| chr7  | 9.1E+07 | 9.1E+07 | -          | A   | exonic          | frameshift insertion   | AKAP9    | NM_005751:c.2560_2561insA;p.E854fs          | P158 |
| chr7  | 9.1E+07 | 9.1E+07 | AGA        | -   | exonic          | nonframeshift deletion | AKAP9    | NM_005751:c.4320_4322del;p.1440_1441del     | P158 |
| chr9  | 3.3E+07 | 3.3E+07 | T          | -   | exonic          | frameshift deletion    | TAF1L    | NM_153809:c.1994delA;p.K665fs               | P158 |
| chr11 | 1.1E+08 | 1.1E+08 | T          | -   | exonic          | frameshift deletion    | ATM      | NM_000051:c.179delT;p.V60fs                 | P158 |
| chr17 | 3564974 | 3564974 | A          | -   | exonic          | frameshift deletion    | ITGAE    | NM_002208:c.3456delT;p.F1152fs              | P158 |
| chr19 | 4.8E+07 | 4.8E+07 | C          | -   | exonic          | frameshift deletion    | PSG9     | NM_002784:c.51delG;p.G17fs                  | P158 |
| chr20 | 5.8E+07 | 5.8E+07 | A          | -   | exonic          | nonframeshift deletion | CDH26    | NM_021810:c.497delA;p.X166X                 | P158 |
| chr6  | 1.5E+08 | 1.5E+08 | -          | A   | splicing        |                        | SYNE1    |                                             | P159 |
| chr17 | 7518960 | 7518960 | -          | AA  | exonic          | frameshift insertion   | TP53     | NM_001126115:c.218_219insTT;p.Y73fs         | P23  |
| chr5  | 1.1E+08 | 1.1E+08 | AAAAG      | -   | exonic          | frameshift deletion    | APC      | NM_001127511:c.3867_3871del;p.1289_1291del  | P21  |
| chr6  | 1.5E+08 | 1.5E+08 | -          | T   | exonic          | frameshift insertion   | SYNE1    | NM_033071:c.8516_8517insA;p.M2839fs         | P21  |
| chr7  | 1.5E+08 | 1.5E+08 | -          | T   | splicing        |                        | MLL3     |                                             | P25  |
| chr5  | 1.1E+08 | 1.1E+08 | -          | T   | exonic          | frameshift insertion   | APC      | NM_001127511:c.4080_4081insT;p.Q1360fs      | P86  |
| chr5  | 1.1E+08 | 1.1E+08 | -          | T   | exonic          | frameshift insertion   | APC      | NM_001127511:c.4123_4124insT;p.L1375fs      | P58  |
| chr5  | 1.1E+08 | 1.1E+08 | AAAAG      | -   | exonic          | frameshift deletion    | APC      | NM_001127511:c.3867_3871del;p.1289_1291del  | P145 |
| chr12 | 5998869 | 5998869 | G          | -   | exonic          | frameshift deletion    | VWF      | NM_000552:c.3976delC;p.H1326fs              | P105 |
| chr5  | 1.1E+08 | 1.1E+08 | CAGCAGTGTC | -   | exonic          | frameshift deletion    | APC      | NM_001127511:c.3917_3927del;p.1306_1309del  | P103 |
| chr5  | 1.1E+08 | 1.1E+08 | -          | T   | exonic          | frameshift insertion   | APC      | NM_001127511:c.4130_4131insT;p.S1377fs      | P103 |
| chr5  | 1.1E+08 | 1.1E+08 | AAAAG      | -   | exonic          | frameshift deletion    | APC      | NM_001127511:c.3867_3871del;p.1289_1291del  | P102 |
| chr5  | 1.1E+08 | 1.1E+08 | AAAAG      | -   | exonic          | frameshift deletion    | APC      | NM_001127511:c.3867_3871del;p.1289_1291del  | P99  |
| chr5  | 2.5E+07 | 2.5E+07 | T          | -   | exonic;splicing | frameshift deletion    | CDH10    | NM_006727:c.1001delA;p.K334fs               | P100 |
| chr10 | 1.2E+08 | 1.2E+08 | -          | T   | splicing        |                        | C10orf81 |                                             | P100 |
| chr5  | 1.1E+08 | 1.1E+08 | C          | -   | exonic          | frameshift deletion    | APC      | NM_001127511:c.2222delC;p.A741fs            | P98  |
| chr5  | 1.1E+08 | 1.1E+08 | -          | A   | exonic          | frameshift insertion   | APC      | NM_001127511:c.4606_4607insA;p.E1536fs      | P91  |
| chr1  | 1.6E+08 | 1.6E+08 | A          | -   | splicing        |                        | ATP1A2   |                                             | P117 |
| chr2  | 9.9E+07 | 9.9E+07 | A          | -   | exonic          | frameshift deletion    | LIPT1    | NM_145199:c.361delA;p.K121fs                | P117 |
| chr5  | 2.5E+07 | 2.5E+07 | -          | A   | exonic          | frameshift insertion   | CDH10    | NM_006727:c.1578_1579insT;p.F526fs          | P117 |
| chr6  | 1.7E+08 | 1.7E+08 | -          | A   | splicing        |                        | PDE10A   |                                             | P117 |
| chr10 | 5.5E+07 | 5.5E+07 | T          | -   | exonic          | frameshift deletion    | PCDH15   | NM_001142765:c.3575delA;p.K1192fs           | P117 |
| chr11 | 2125561 | 2125561 | G          | -   | exonic          | frameshift deletion    | INS-IGF2 | NM_001042376:c.460delC;p.Q154fs             | P117 |
| chr11 | 1.1E+08 | 1.1E+08 | T          | -   | exonic          | frameshift deletion    | ATM      | NM_000051:c.2404delT;p.F802fs               | P117 |
| chr15 | 2.6E+07 | 2.6E+07 | AG         | -   | exonic          | frameshift deletion    | HERC2    | NM_004667:c.11840_11841del;p.3947_3947del   | P117 |
| chr16 | 7.4E+07 | 7.4E+07 | T          | -   | exonic          | frameshift deletion    | WDR59    | NM_030581:c.479delA;p.N160fs                | P117 |
| chr20 | 5.8E+07 | 5.8E+07 | A          | -   | exonic          | nonframeshift deletion | CDH26    | NM_021810:c.497delA;p.X166X                 | P117 |
| chr14 | 3.2E+07 | 3.2E+07 | -          | T   | exonic          | frameshift insertion   | ARHGAP5  | NM_001030055:c.169_170insT;p.L57fs          | P82  |
| chr2  | 1.7E+08 | 1.7E+08 | -          | A   | exonic          | frameshift insertion   | LRP2     | NM_004525:c.1349_1350insT;p.S450fs          | P108 |
| chr2  | 2E+08   | 2E+08   | -          | A   | exonic          | frameshift insertion   | CASP8    | NM_033356:c.1367_1368insA;p.R456fs          | P108 |
| chr5  | 1.1E+08 | 1.1E+08 | A          | -   | exonic          | frameshift deletion    | APC      | NM_001127511:c.4306delA;p.K1436fs           | P108 |
| chr5  | 1.5E+08 | 1.5E+08 | -          | G   | exonic          | frameshift insertion   | FAT2     | NM_001447:c.12439_12440insC;p.R4147fs       | P108 |
| chr11 | 1.1E+08 | 1.1E+08 | -          | A   | exonic          | frameshift insertion   | ATM      | NM_000051:c.4735_4736insA;p.Q1579fs         | P108 |
| chr5  | 1.1E+08 | 1.1E+08 | -          | A   | exonic          | frameshift insertion   | APC      | NM_001127511:c.3085_3086insA;p.E1029fs      | P81  |
| chr17 | 7519196 | 7519207 | GGGCGGGGGT | -   | exonic          | nonframeshift deletion | TP53     | NM_001126115:c.52_63del;p.18_21del          | P81  |
| chr7  | 1.5E+08 | 1.5E+08 | T          | -   | exonic          | frameshift deletion    | MLL3     | NM_170606:c.8390delA;p.K2797fs              | P15  |
| chrX  | 7.1E+07 | 7.1E+07 | A          | -   | exonic          | frameshift deletion    | TAF1     | NM_004606:c.1993delA;p.K665fs               | P15  |
| chr1  | 1.5E+08 | 1.5E+08 | CTCA       | -   | exonic          | frameshift deletion    | FLG      | NM_002016:c.3222_3225del;p.1074_1075del     | P13  |
| chr5  | 1.1E+08 | 1.1E+08 | AAAAG      | -   | exonic          | frameshift deletion    | APC      | NM_001127511:c.3867_3871del;p.1289_1291del  | P13  |

|       |         |         |             |        |                 |                        |         |                                                 |      |
|-------|---------|---------|-------------|--------|-----------------|------------------------|---------|-------------------------------------------------|------|
| chr5  | 1.4E+08 | 1.4E+08 | A           | -      | exonic          | frameshift deletion    | PCDHB4  | NM_018938:c.1104delA:p.R368fs                   | P13  |
| chr19 | 4.4E+07 | 4.4E+07 | AAG         | -      | exonic          | nonframeshift deletion | RYR1    | NM_001042723:c.10468_10470del:p.3490_3490del    | P13  |
| chr5  | 1.1E+08 | 1.1E+08 | AAAAG       | -      | exonic          | frameshift deletion    | APC     | NM_001127511:c.3867_3871del:p.1289_1291del      | P14  |
| chr5  | 1.1E+08 | 1.1E+08 | AG          | -      | exonic          | frameshift deletion    | APC     | NM_001127511:c.4331_4332del:p.1444_1444del      | P11  |
| chr7  | 1.5E+08 | 1.5E+08 | G           | -      | exonic          | frameshift deletion    | MLL3    | NM_170606:c.11702delC:p.P3901fs                 | P11  |
| chr3  | 1.2E+08 | 1.2E+08 | ACA         | -      | exonic          | nonframeshift deletion | MYLK    | NM_053025:c.1182_1184del:p.394_395del           | P12  |
| chr5  | 1.1E+08 | 1.1E+08 | -           | A      | exonic          | frameshift insertion   | APC     | NM_001127511:c.4606_4607insA:p.E1536fs          | P67  |
| chr5  | 1.1E+08 | 1.1E+08 | A           | -      | exonic          | frameshift deletion    | APC     | NM_001127511:c.4255delA:p.K1419fs               | P77  |
| chr5  | 1.1E+08 | 1.1E+08 | -           | ATGTTT | exonic;splicing | nonframeshift insertic | APC     | NM_001127511:c.879_880insATGTTT:p.K293delinsKMF | P70  |
| chr5  | 1.1E+08 | 1.1E+08 | -           | A      | exonic          | frameshift insertion   | APC     | NM_001127511:c.4606_4607insA:p.E1536fs          | P70  |
| chr5  | 1.1E+08 | 1.1E+08 | AAAAG       | -      | exonic          | frameshift deletion    | APC     | NM_001127511:c.3867_3871del:p.1289_1291del      | P71  |
| chr1  | 1.6E+08 | 1.6E+08 | T           | -      | exonic          | frameshift deletion    | ATP1A4  | NM_144699:c.989delT;p.I330fs                    | P75  |
| chr2  | 1.5E+07 | 1.5E+07 | -           | TA     | exonic          | frameshift insertion   | NBAS    | NM_015909:c.4101_4102insTA:p.Q1367fs            | P75  |
| chr5  | 1.1E+08 | 1.1E+08 | -           | A      | exonic          | frameshift insertion   | APC     | NM_001127511:c.3853_3854insA:p.Q1285fs          | P75  |
| chr11 | 1.1E+08 | 1.1E+08 | A           | -      | exonic          | frameshift deletion    | ATM     | NM_000051:c.8426delA:p.Q2809fs                  | P6   |
| chr10 | 5.5E+07 | 5.5E+07 | AGGAGC      | -      | exonic          | nonframeshift deletion | PCDH15  | NM_001142767:c.5167_5172del:p.1723_1724del      | P9   |
| chr22 | 4E+07   | 4E+07   | -           | A      | exonic          | frameshift insertion   | EP300   | NM_001429:c.4401_4402insA:p.Y1467fs             | P9   |
| chr12 | 1.3E+08 | 1.3E+08 | -           | GCA    | exonic          | nonframeshift insertic | EP400   | NM_015409:c.8153_8154insGCA;p.R2718delinsRQ     | P57  |
| chr5  | 1.1E+08 | 1.1E+08 | AG          | -      | exonic          | frameshift deletion    | APC     | NM_001127511:c.4331_4332del:p.1444_1444del      | P56  |
| chr5  | 1.1E+08 | 1.1E+08 | AG          | -      | exonic          | frameshift deletion    | APC     | NM_001127511:c.4331_4332del:p.1444_1444del      | P53  |
| chr5  | 1.1E+08 | 1.1E+08 | A           | -      | exonic          | frameshift deletion    | APC     | NM_001127511:c.3872delA:p.E1291fs               | P51  |
| chr5  | 1.1E+08 | 1.1E+08 | AG          | -      | exonic          | frameshift deletion    | APC     | NM_001127511:c.4331_4332del:p.1444_1444del      | P96  |
| chr5  | 1.1E+08 | 1.1E+08 | -           | A      | exonic          | frameshift insertion   | APC     | NM_001127511:c.3989_3990insA:p.R1330fs          | P59  |
| chr5  | 1.1E+08 | 1.1E+08 | TC          | -      | exonic          | frameshift deletion    | APC     | NM_001127511:c.4111_4112del:p.1371_1371del      | P59  |
| chr5  | 1.1E+08 | 1.1E+08 | G           | -      | exonic          | frameshift deletion    | APC     | NM_001127511:c.4185delG:p.M1395fs               | P1   |
| chr5  | 1.1E+08 | 1.1E+08 | -           | A      | exonic          | frameshift insertion   | APC     | NM_001127511:c.4606_4607insA:p.E1536fs          | P135 |
| chr1  | 1.6E+08 | 1.6E+08 | G           | -      | exonic          | frameshift deletion    | SPTA1   | NM_003126:c.3163delC:p.Q1055fs                  | P134 |
| chr2  | 2E+08   | 2E+08   | A           | -      | exonic          | frameshift deletion    | CASP8   | NM_033356:c.1368delA:p.R456fs                   | P134 |
| chr5  | 1.3E+08 | 1.3E+08 | T           | -      | exonic          | frameshift deletion    | ACSL6   | NM_001205251:c.1836delA:p.K612fs                | P134 |
| chr6  | 1.5E+08 | 1.5E+08 | T           | -      | exonic          | frameshift deletion    | GRM1    | NM_000838:c.19delT;p.F7fs                       | P134 |
| chr6  | 1.5E+08 | 1.5E+08 | T           | -      | exonic          | frameshift deletion    | SYNE1   | NM_015293:c.4184delA:p.K1395fs                  | P134 |
| chr7  | 1.5E+08 | 1.5E+08 | -           | T      | exonic          | frameshift insertion   | MLL3    | NM_170606:c.8391_8392insA:p.K2797fs             | P134 |
| chr12 | 1.1E+08 | 1.1E+08 | C           | -      | exonic          | frameshift deletion    | ACACB   | NM_001093:c.4187delC:p.T1396fs                  | P134 |
| chr17 | 1E+07   | 1E+07   | -           | C      | exonic          | frameshift insertion   | MYH4    | NM_017533:c.175_176insG:p.K59fs                 | P134 |
| chr17 | 7.6E+07 | 7.6E+07 | C           | -      | exonic          | frameshift deletion    | RNF213  | NM_020954:c.667delC:p.P223fs                    | P134 |
| chr20 | 5.8E+07 | 5.8E+07 | A           | -      | exonic          | nonframeshift deletion | CDH26   | NM_021810:c.497delA:p.X166X                     | P134 |
| chr22 | 2.2E+07 | 2.2E+07 | G           | -      | exonic          | frameshift deletion    | GNAZ    | NM_002073:c.606delG:p.V202fs                    | P134 |
| chrX  | 3.2E+07 | 3.2E+07 | T           | -      | exonic          | frameshift deletion    | DMD     | NM_004011:c.1674delA:p.K558fs                   | P134 |
| chr5  | 1.1E+08 | 1.1E+08 | G           | -      | exonic          | frameshift deletion    | APC     | NM_001127511:c.4425delG:p.T1475fs               | P132 |
| chr17 | 7518281 | 7518286 | CAGGAA      | -      | exonic          | nonframeshift deletion | TP53    | NM_001126115:c.324_329del:p.108_110del          | P126 |
| chr8  | 1.4E+08 | 1.4E+08 | -           | GAT    | exonic          | nonframeshift insertic | TSNARE1 | NM_145003:c.1522_1523insATC;p.A508delinsIA      | P129 |
| chr12 | 5.1E+07 | 5.1E+07 | CCAAAGCCACC | -      | exonic          | nonframeshift deletion | KRT3    | NM_057088:c.396_413del:p.132_138del             | P129 |
