# Supplementary material for: Novel recurrently mutated genes and a prognostic mutation signature in colorectal cancer
Source: HighWire-hosted journal article supplement (doi:10.1136/gutjnl-2013-306620), 2014-06-20
Supplement: gutjnl-2013-306620supp_tableS10.pdf [file gutjnl-2013-306620supp_tableS10.pdf]

**Table S10.** Number of potentially protein function-changing mutations with SIFT score < 0.05 or PolyPhen2 score > 0.85 versus number of non-silent mutations in 7 SMGs

| Gene         | Number of protein function-changing mutations | Number of non-silent mutations |
|--------------|-----------------------------------------------|--------------------------------|
| <i>KRAS</i>  | 58                                            | 58                             |
| <i>APC</i>   | 66                                            | 151                            |
| <i>TP53</i>  | 64                                            | 80                             |
| <i>CDH10</i> | 12                                            | 20                             |
| <i>SMAD4</i> | 9                                             | 11                             |
| <i>FAT4</i>  | 15                                            | 38                             |
| <i>DOCK2</i> | 10                                            | 17                             |
