# Supplementary material for: Novel recurrently mutated genes and a prognostic mutation signature in colorectal cancer
Source: HighWire-hosted journal article supplement (doi:10.1136/gutjnl-2013-306620), 2014-06-20
Supplement: gutjnl-2013-306620supp_tableS11.pdf [file gutjnl-2013-306620supp_tableS11.pdf]

**Table S11.** SMGs identified by functional screening using Oncodrive

| <b>Gene</b>   | <b>p value</b> | <b>q value</b> |
|---------------|----------------|----------------|
| <i>TP53</i>   | 7.16E-14       | 1.55E-11       |
| <i>APC</i>    | 2.13E-08       | 2.30E-06       |
| <i>SMAD4</i>  | 8.78E-08       | 6.32E-06       |
| <i>ACTC</i>   | 1.20E-07       | 6.50E-06       |
| <i>KRAS</i>   | 1.71E-06       | 7.38E-05       |
| <i>SMAD3</i>  | 8.29E-05       | 2.99E-03       |
| <i>PIK3R3</i> | 1.85E-04       | 5.70E-03       |
| <i>ACSL6</i>  | 6.49E-04       | 1.56E-02       |
| <i>ATP1A2</i> | 6.00E-04       | 1.56E-02       |
| <i>MTOR</i>   | 1.11E-03       | 2.40E-02       |
| <i>FBXW7</i>  | 4.50E-03       | 8.84E-02       |
