# Supplementary material for: Novel recurrently mutated genes and a prognostic mutation signature in colorectal cancer
Source: HighWire-hosted journal article supplement (doi:10.1136/gutjnl-2013-306620), 2014-06-20
Supplement: gutjnl-2013-306620supp_tableS12.pdf [file gutjnl-2013-306620supp_tableS12.pdf]

**Table S12** Cox regression analysis (TCGA cohort)

| Variables                     | Univariate       |         | Multivariate       |         |
|-------------------------------|------------------|---------|--------------------|---------|
|                               | HR (95% CI)      | P value | HR (95% CI)        | P value |
| Age (n=85)                    | 1.03 (0.98-1.08) | 0.2200  |                    |         |
| Sex                           |                  |         |                    |         |
| Male (n=47)                   | 2.67 (0.92-7.73) | 0.0700  | 4.24 (1.23-14.6)   | 0.0220  |
| Female (n=38)                 | 1.00             |         | 1                  |         |
| Tumor localization            |                  |         |                    |         |
| colon (n=71)                  | 0.35 (0.12-1.01) | 0.0530  | 0.14 (0.03-0.60)   | 0.0087  |
| rectum (n=12)                 | 1.00             |         | 1                  |         |
| TNM                           |                  |         |                    |         |
| 1 (n=12)                      | 0.00 (0.00-0.00) | NA      | 0.00 (0.00 - 0.00) | NA      |
| 2 (n=32)                      | 0.29 (0.07-1.13) | 0.0800  | 0.5 (0.11-2.29)    | 0.3700  |
| 3 (n=31)                      | 0.26 (0.06-1.10) | 0.0700  | 0.28 (0.06-1.39)   | 0.1200  |
| 4 (n=8)                       | 1.00             |         |                    |         |
| Hypermutation                 |                  |         |                    |         |
| Yes (n=15)                    | 0.00 (0.00-0.00) | NA      | 0.00 (0.00-0.00)   | NA      |
| No (n=70)                     | 1.00             |         |                    |         |
| MSI                           |                  |         |                    |         |
| 0 (n=57)                      | 1.00             |         |                    |         |
| 1 (n=13)                      | 1.52 (0.52-4.37) | 0.4500  | 4.24 (1.10-16.35)  | 0.0360  |
| 2 (n=14)                      | 0.00 (0.00-0.00) | NA      | 0.00 (0.00-0.00)   | NA      |
| KRAS G12/13X                  |                  |         |                    |         |
| 0 (n=57)                      | 1.00             |         |                    |         |
| 1 (n=28)                      | 0.85 (0.31-2.34) | 0.7600  |                    |         |
| Prognostic mutation signature |                  |         |                    |         |
| Yes (n=48)                    | 0.36 (0.13-0.97) | 0.0426  | 0.15 (0.04-0.57)   | 0.0048  |
| No (n=37)                     | 1.00             |         | 1                  |         |

**Note:** Variables with *P* value < 0.1 in univariate Cox analysis are kept in multivariate Cox analysis. The prognostic mutation signature includes five genes (i.e. CDH10, COL6A3, VCAN, TMEM132D, SMAD4). *P* values for TNM1, hypermutation and MSI2 are not available as all patients survived in these categories.
