# Supplementary material for: Novel recurrently mutated genes and a prognostic mutation signature in colorectal cancer
Source: HighWire-hosted journal article supplement (doi:10.1136/gutjnl-2013-306620), 2014-06-20
Supplement: gutjnl-2013-306620supp_tableS13.pdf [file gutjnl-2013-306620supp_tableS13.pdf]

**Table S13.** Co-occurrence and exclusivity analyses of mutated genes in 182 exome- and capture sequenced-colorectal cancer patients. n1 and n2, number of samples that harbored mutation in gene1 and gene2, respectively; k0, number of samples that harbored mutations in both gene1 and gene2.

| gene1 | gene2    | n1  | n2 | k0 | cooccurrence_pvalue | exclusivity_pvalue |
|-------|----------|-----|----|----|---------------------|--------------------|
| USH2A | NBAS     | 19  | 10 | 7  | 0.00244             | 0.9998             |
| USH2A | FAT4     | 19  | 26 | 9  | 0.03485             | 0.99154            |
| USH2A | AKAP9    | 19  | 10 | 7  | 0.00255             | 0.99975            |
| USH2A | MLL3     | 19  | 14 | 7  | 0.02109             | 0.99686            |
| USH2A | LAMA2    | 19  | 10 | 7  | 0.00235             | 0.99988            |
| CDH9  | KRAS     | 9   | 58 | 2  | 0.99757             | 0.02735            |
| CDH9  | LRP2     | 9   | 15 | 5  | 0.03463             | 0.99603            |
| CDH9  | CDH10    | 9   | 15 | 5  | 0.03553             | 0.9959             |
| RELN  | TP53     | 9   | 76 | 3  | 0.99368             | 0.04382            |
| KRAS  | NBAS     | 58  | 10 | 2  | 0.99887             | 0.01563            |
| KRAS  | DMD      | 58  | 13 | 3  | 0.99735             | 0.01821            |
| KRAS  | AKAP9    | 58  | 10 | 1  | 1                   | 0.00134            |
| KRAS  | TMEM132C | 58  | 9  | 2  | 0.99744             | 0.0273             |
| KRAS  | ATM      | 58  | 18 | 5  | 0.99239             | 0.03262            |
| KRAS  | LAMA2    | 58  | 10 | 1  | 1                   | 0.00106            |
| KRAS  | SYNE1    | 58  | 30 | 6  | 0.99993             | 0.00065            |
| KRAS  | PDE10A   | 58  | 10 | 1  | 1                   | 0.00115            |
| KRAS  | COL1A2   | 58  | 9  | 2  | 0.99751             | 0.02725            |
| KRAS  | CDH10    | 58  | 15 | 4  | 0.99396             | 0.03167            |
| KRAS  | VCAN     | 58  | 15 | 1  | 1                   | 6e-05              |
| NBAS  | DOCK2    | 10  | 14 | 6  | 0.0052              | 0.99969            |
| NBAS  | AKAP9    | 10  | 10 | 5  | 0.01207             | 0.99926            |
| NBAS  | MLL3     | 10  | 14 | 5  | 0.04137             | 0.99437            |
| NBAS  | LAMA2    | 10  | 10 | 5  | 0.01311             | 0.99892            |
| APC   | DMD      | 108 | 13 | 5  | 0.99973             | 0.00214            |
| APC   | HMCN1    | 108 | 15 | 8  | 0.99061             | 0.03871            |
| APC   | VCAN     | 108 | 15 | 8  | 0.99035             | 0.03953            |
| DOCK2 | MLL3     | 14  | 14 | 6  | 0.02981             | 0.99588            |
| DOCK2 | HMCN1    | 14  | 15 | 6  | 0.03788             | 0.99363            |
| AKAP9 | MLL3     | 10  | 14 | 5  | 0.04307             | 0.99452            |
| AKAP9 | LAMA2    | 10  | 10 | 7  | 3e-05               | 1                  |
| AKAP9 | SYNE1    | 10  | 30 | 8  | 0.00313             | 0.99976            |
| MLL3  | LAMA2    | 14  | 10 | 5  | 0.04175             | 0.99461            |
| MLL3  | VCAN     | 14  | 15 | 6  | 0.03945             | 0.99327            |
| HERC2 | PCDH15   | 11  | 13 | 5  | 0.04628             | 0.99317            |
| HMCN1 | TP53     | 15  | 76 | 5  | 0.99615             | 0.02026            |
| HMCN1 | SYNE1    | 15  | 30 | 9  | 0.01563             | 0.99728            |
| HMCN1 | LRP2     | 15  | 15 | 6  | 0.04962             | 0.99094            |
| TP53  | ATM      | 76  | 18 | 6  | 0.99673             | 0.01488            |
| TP53  | SYNE1    | 76  | 30 | 12 | 0.98516             | 0.03947            |
| SMAD4 | SYNE1    | 11  | 30 | 1  | 1                   | 0.01415            |
| LAMA2 | SYNE1    | 10  | 30 | 8  | 0.00289             | 0.99983            |
| LAMA2 | VCAN     | 10  | 15 | 6  | 0.00703             | 0.9994             |
